# Supplementary material for: Nanopore direct RNA sequencing provides additional insight into transcriptome differentiation during transition to the aquatic environment of amphibious liverwort Riccia fluitans L. (Marchantiales)
Source: Research Square preprint supplement (doi:10.21203/rs.3.rs-4043135/v1), 2024-03-13
Supplement: Supplementary file 1 [file 44e6cd006eb8faa7507e0d2f.xlsx]

## Sheet: Table S1
Table S1. Summary stats of RNA-seq and direct Nanopore
	L1	L2	L3	L4	W1	W2	W3	W4
Illumina reads (paired end)	2x48971531	2x63025771	2x95111863	2x72078054	2x81944574	2x77655118	2x47328116	2x94175544
Illumina trimmed reads (paired end)	2x42269112	2x55012232	2x84544658	2x64289402	2x72707514	2x69260303	2x42010648	2x84471782
Nanopore reads	1331055	726251	2026998	1235548	1084740	1275276	652835	905881

## Sheet: Table S2
Table S2. Differentially expressed genes between water and land environmental using direct RNA
gene_id	arabidopsis_id	log2FoldChange	pvalue	padj	Transcripts	L1_counts	L2_counts	L3_counts	L4_counts	W1_counts	W2_counts	W3_counts	W4_counts	description
CL.3787	AT5G63500	-4.03909	2.77849e-24	8.3077e-21	DEGs	43.8876	38.3946	53.1878	49.5909	1.96247	3.05805	1.54833	4.25361	transmembrane protein, putative (DUF 3339) [Source:NCBI gene (formerly Entrezgene);Acc:836469]
CL.23265	AT1G24020	2.0216	2.15097e-23	3.2157e-20	DEGs	34.1348	47.1206	42.5502	38.2807	163.866	137.612	188.122	159.936	MLP-like protein 423 [Source:NCBI gene (formerly Entrezgene);Acc:839014]
CL.33350	AT3G12500	-2.75427	7.33645e-18	7.31199e-15	DEGs	37.3858	55.8466	53.1878	64.8162	3.92494	7.13545	6.19332	15.313	basic chitinase [Source:NCBI gene (formerly Entrezgene);Acc:820429]
CL.21493	NA	-3.24317	3.02788e-15	2.26334e-12	OtherRNA	34.1348	22.6877	35.4585	34.8006	2.9437	4.33224	0	5.10433	NA
CL.29308	NA	-2.44353	2.14769e-13	1.28432e-10	DEGs	56.8914	36.6493	31.9127	32.1906	5.88741	8.91931	6.96748	5.10433	NA
CL.31846	NA	-2.31431	4.33752e-13	2.16153e-10	OtherRNA	45.5131	31.4137	60.2795	36.5407	4.90617	9.93866	5.41915	11.0594	NA
CL.19794	NA	-2.10329	9.88541e-13	4.22248e-10	DEGs	69.8951	41.885	35.4585	60.0311	11.7748	16.3096	6.96748	12.7608	NA
CL.21237	AT2G39050	-6.9116	7.96932e-12	2.97853e-09	DEGs	24.382	27.9233	17.7293	20.8804	0	0	0	0.850722	hydroxyproline-rich glycoprotein family protein [Source:NCBI gene (formerly Entrezgene);Acc:818491]
CL.31036	NA	-6.93144	1.11636e-11	3.7088e-09	DEGs	32.5094	29.6685	10.6376	17.8353	0	0.254837	0	0	NA
CL.4378	NA	-6.97961	1.308e-10	3.91091e-08	DELs	13.0037	8.72603	21.2751	16.9653	0	0	0	0	NA
CL.24835	NA	-6.76599	5.33144e-10	1.44918e-07	DEGs	14.6292	13.9617	10.6376	11.7452	0	0	0	0	NA
CL.6620	NA	-6.56904	2.62891e-09	6.55037e-07	DELs	16.2547	8.72603	7.09171	10.8752	0	0	0	0	NA
CL.2593	AT4G16160	-5.31248	2.85103e-09	6.55736e-07	DEGs	17.8801	6.98083	28.3668	17.8353	0.981235	0	0.774165	0.850722	Mitochondrial import inner membrane translocase subunit Tim17/Tim22/Tim23 family protein [Source:NCBI gene (formerly Entrezgene);Acc:827308]
CL.6999	NA	-6.15828	4.02995e-08	8.60682e-06	DEGs	6.50187	10.4712	7.09171	8.70016	0	0	0	0	NA
CL.29541	AT2G25060	-5.29892	6.8988e-08	1.263e-05	DEGs	16.2547	10.4712	10.6376	9.13517	0	0.254837	0.774165	0	early nodulin-like protein 14 [Source:NCBI gene (formerly Entrezgene);Acc:817044]
CL.16392	NA	-6.08975	7.39991e-08	1.263e-05	OtherRNA	3.25094	6.98083	14.1834	9.13517	0	0	0	0	NA
CL.16402	NA	-6.13437	6.93341e-08	1.263e-05	OtherRNA	4.8764	3.49041	21.2751	8.26515	0	0	0	0	NA
CL.2490	NA	-6.08493	7.60333e-08	1.263e-05	DEGs	9.75281	12.2164	3.54585	6.09011	0	0	0	0	NA
CL.26210	AT5G54500	1.71236	3.56931e-07	5.61697e-05	DEGs	4.8764	20.9425	10.6376	11.3102	40.2306	31.345	51.869	33.1782	flavodoxin-like quinone reductase 1 [Source:NCBI gene (formerly Entrezgene);Acc:835538]
CL.14955	AT5G44310	-5.77927	4.96081e-07	7.41641e-05	DEGs	4.8764	10.4712	3.54585	6.09011	0	0	0	0	Late embryosis abundant protein (LEA) family protein [Source:NCBI gene (formerly Entrezgene);Acc:834454]
CL.11525	NA	-4.98658	5.34719e-07	7.61339e-05	DEGs	6.50187	10.4712	14.1834	8.70016	0	0	1.54833	0	NA
CL.14958	AT4G21020	-4.64394	6.81429e-07	8.85858e-05	DEGs	9.75281	5.23562	10.6376	13.4852	0	0.254837	1.54833	0	Late embryosis abundant protein (LEA) family protein [Source:NCBI gene (formerly Entrezgene);Acc:827849]
CL.31034	NA	-6.71747	6.58176e-07	8.85858e-05	DEGs	27.633	6.98083	3.54585	10.0052	0	0	0	0	NA
CL.29301	NA	-5.34523	1.56897e-06	0.000195468	OtherRNA	6.50187	6.98083	0	12.1802	0	0	0.774165	0	NA
CL.31845	NA	-1.95141	1.67526e-06	0.000200361	DEGs	27.633	24.4329	21.2751	38.2807	5.88741	12.9967	2.32249	5.95506	NA
CL.14960	AT5G44310	-5.6274	2.37544e-06	0.000263058	DEGs	6.50187	5.23562	0	7.83014	0	0	0	0	Late embryosis abundant protein (LEA) family protein [Source:NCBI gene (formerly Entrezgene);Acc:834454]
CL.14956	NA	-5.54323	2.30349e-06	0.000263058	OtherRNA	8.12734	3.49041	3.54585	5.6551	0	0	0	0	NA
CL.2642	AT1G76680	-2.66974	4.46317e-06	0.000476602	DEGs	13.0037	8.72603	7.09171	13.0502	0.981235	2.54837	1.54833	0.850722	12-oxophytodienoate reductase 1 [Source:NCBI gene (formerly Entrezgene);Acc:844001]
CL.12887	AT4G16160	-4.62889	8.09471e-06	0.000834593	DEGs	8.12734	3.49041	14.1834	5.6551	0	0.509675	0	0	Mitochondrial import inner membrane translocase subunit Tim17/Tim22/Tim23 family protein [Source:NCBI gene (formerly Entrezgene);Acc:827308]
CL.8117	AT1G02360	2.184	9.68917e-06	0.000965688	DEGs	3.25094	3.49041	10.6376	3.48006	14.7185	22.1709	12.3866	24.6709	Chitinase family protein [Source:NCBI gene (formerly Entrezgene);Acc:837724]
CL.16398	NA	-5.00344	1.1112e-05	0.00107177	OtherRNA	6.50187	1.74521	3.54585	9.13517	0	0.254837	0	0	NA
CL.5654	AT5G48300	2.91456	1.41812e-05	0.00132506	DEGs	0	0	0	3.48006	10.7936	15.5451	11.6125	18.7159	ADP glucose pyrophosphorylase 1 [Source:NCBI gene (formerly Entrezgene);Acc:834883]
CL.22718	AT5G24090	-5.22331	1.47713e-05	0.00133837	DEGs	4.8764	5.23562	3.54585	3.91507	0	0	0	0	chitinase A [Source:NCBI gene (formerly Entrezgene);Acc:832474]
CL.5950	NA	-4.78803	2.03537e-05	0.00178993	OtherRNA	9.75281	3.49041	3.54585	4.35008	0	0	0	0.850722	NA
CL.22913	AT1G44575	1.25753	2.31854e-05	0.0019807	DEGs	9.75281	20.9425	21.2751	20.0104	41.2119	56.5739	34.8374	36.5811	Chlorophyll A-B binding family protein [Source:NCBI gene (formerly Entrezgene);Acc:841033]
CL.18550	AT1G07890	1.41157	2.54788e-05	0.00211616	DEGs	8.12734	10.4712	7.09171	13.0502	23.5496	28.2869	32.5149	31.4767	ascorbate peroxidase 1 [Source:NCBI gene (formerly Entrezgene);Acc:837304]
CL.12695	NA	2.37208	2.6902e-05	0.00217397	DEGs	1.62547	3.49041	7.09171	2.17504	12.756	14.0161	10.8383	19.5666	NA
CL.8087	AT1G04560	-5.15892	2.87545e-05	0.00226253	DEGs	8.12734	1.74521	3.54585	3.48006	0	0	0	0	AWPM-19-like family protein [Source:NCBI gene (formerly Entrezgene);Acc:839491]
CL.31779	AT1G47980	-4.62668	4.44033e-05	0.00331914	DEGs	4.8764	5.23562	10.6376	2.61005	0	0	0.774165	0	desiccation-like protein [Source:NCBI gene (formerly Entrezgene);Acc:841216]
CL.4379	NA	-4.99027	5.02075e-05	0.00366147	OtherRNA	3.25094	3.49041	7.09171	3.04506	0	0	0	0	NA
CL.25655	NA	1.49131	6.15764e-05	0.00438366	OtherRNA	6.50187	3.49041	24.821	13.4852	35.3244	30.5805	18.58	42.5361	NA
CL.15081	NA	3.14964	6.77206e-05	0.00470895	DEGs	3.25094	1.74521	0	0.435008	10.7936	9.93866	6.96748	12.7608	NA
CL.29341	NA	-3.60308	7.19828e-05	0.00475807	DELs	6.50187	8.72603	7.09171	4.78509	0	0.764512	0	0.850722	NA
CL.33060	NA	1.3987	7.20473e-05	0.00475807	OtherRNA	4.8764	8.72603	10.6376	17.8353	30.4183	39.245	28.6441	28.9246	NA
CL.23615	NA	-3.51508	7.32011e-05	0.00475807	OtherRNA	11.3783	5.23562	7.09171	4.35008	0.981235	0.254837	0.774165	0.850722	NA
CL.16494	AT2G38860	-2.48803	7.85618e-05	0.00499787	DEGs	8.12734	8.72603	14.1834	6.52512	2.9437	1.52902	0.774165	0.850722	Class I glutamine amidotransferase-like superfamily protein [Source:NCBI gene (formerly Entrezgene);Acc:818470]
CL.15515	AT1G54870	-7.02073	0.000100658	0.00614218	DEGs	26.0075	17.4521	0	16.5303	0	0	0	0	NAD(P)-binding Rossmann-fold superfamily protein [Source:NCBI gene (formerly Entrezgene);Acc:841926]
CL.22702	NA	-4.53562	0.000104502	0.00624919	DELs	1.62547	5.23562	14.1834	2.17504	0	0.254837	0	0	NA
CL.4006	NA	-4.88406	0.000110585	0.0064833	OtherRNA	4.8764	3.49041	3.54585	2.61005	0	0	0	0	NA
CL.4969	AT5G01300	-3.05747	0.000132931	0.00764353	DEGs	11.3783	5.23562	0	7.39514	1.96247	0.764512	0	0.850722	PEBP (phosphatidylethanolamine-binding protein) family protein [Source:NCBI gene (formerly Entrezgene);Acc:830983]
CL.29340	NA	-2.38963	0.000137479	0.00775587	OtherRNA	6.50187	10.4712	21.2751	10.8752	0	4.58707	0.774165	0.850722	NA
CL.32966	AT2G30870	-4.58818	0.000149669	0.00828725	DEGs	4.8764	0	3.54585	7.83014	0	0	0.774165	0	glutathione S-transferase PHI 10 [Source:NCBI gene (formerly Entrezgene);Acc:817637]
CL.21420	AT1G43710	-4.46962	0.000155882	0.00832298	DEGs	6.50187	1.74521	3.54585	4.35008	0	0.254837	0	0	Pyridoxal phosphate (PLP)-dependent transferases superfamily protein [Source:NCBI gene (formerly Entrezgene);Acc:840958]
CL.25653	NA	1.3405	0.000155398	0.00832298	OtherRNA	8.12734	5.23562	17.7293	10.8752	20.6059	29.816	21.6766	26.3724	NA
CL.21025	NA	-2.15477	0.000216971	0.0113815	DELs	6.50187	5.23562	14.1834	10.0052	2.9437	1.52902	2.32249	1.70144	NA
CL.31285	NA	1.75703	0.000279882	0.0144284	DELs	4.8764	5.23562	7.09171	3.48006	13.7373	19.1128	12.3866	12.7608	NA
CL.31915	AT5G14740	-1.51938	0.00030466	0.0151822	DEGs	13.0037	12.2164	14.1834	23.0554	4.90617	7.64512	6.19332	3.40289	carbonic anhydrase 2 [Source:NCBI gene (formerly Entrezgene);Acc:831326]
CL.18188	AT2G05100	-1.69542	0.00036184	0.0177361	DEGs	16.2547	15.7069	3.54585	10.4402	2.9437	4.0774	2.32249	5.10433	photosystem II light harvesting complex protein 2.1 [Source:NCBI gene (formerly Entrezgene);Acc:815058]
CL.32525	AT2G42600	1.40919	0.000401754	0.0193749	DEGs	8.12734	10.4712	7.09171	5.6551	19.6247	21.1515	14.7091	20.4173	phosphoenolpyruvate carboxylase 2 [Source:NCBI gene (formerly Entrezgene);Acc:818860]
CL.2489	AT3G23920	-1.96359	0.000431242	0.0204669	DEGs	14.6292	10.4712	3.54585	7.39514	3.92494	2.0387	1.54833	2.55217	beta-amylase 1 [Source:NCBI gene (formerly Entrezgene);Acc:821975]
CL.23364	NA	-4.71514	0.000460343	0.0206578	OtherRNA	6.50187	0	3.54585	2.61005	0	0	0	0	NA
CL.4384	NA	-4.75049	0.000459948	0.0206578	OtherRNA	1.62547	6.98083	0	3.04506	0	0	0	0	NA
CL.30781	NA	-4.75049	0.000459948	0.0206578	DELs	1.62547	6.98083	0	3.04506	0	0	0	0	NA
CL.3752	NA	-1.57591	0.0004629	0.0206578	DELs	22.7565	22.6877	7.09171	30.4506	18.6435	5.09675	3.87082	5.10433	NA
CL.16407	NA	-4.6148	0.000512902	0.0222258	OtherRNA	3.25094	1.74521	3.54585	3.04506	0	0	0	0	NA
CL.7362	NA	-3.16163	0.000553658	0.0236491	OtherRNA	4.8764	1.74521	10.6376	6.09011	0.981235	0	2.32249	0	NA
CL.1939	AT4G36430	2.54016	0.000713349	0.030041	DEGs	1.62547	0	7.09171	0.870016	7.84988	7.89996	9.28998	7.6565	Peroxidase superfamily protein [Source:NCBI gene (formerly Entrezgene);Acc:829795]
CL.32326	ATCG01010	3.53681	0.000881891	0.036623	DEGs	0	0	0	0.435008	6.86864	2.80321	5.41915	5.10433
CL.25293	AT3G26520	-4.49272	0.000960047	0.0380972	DEGs	3.25094	0	7.09171	2.17504	0	0	0	0	tonoplast intrinsic protein 2 [Source:NCBI gene (formerly Entrezgene);Acc:822259]
CL.29229	NA	-3.04776	0.000949808	0.0380972	OtherRNA	3.25094	3.49041	10.6376	4.35008	0	0.254837	1.54833	0.850722	NA
CL.2289	NA	1.89424	0.000968356	0.0380972	OtherRNA	1.62547	3.49041	0	3.91507	9.81235	11.4677	15.4833	7.6565	NA
CL.29964	NA	-2.84762	0.000990171	0.0384495	OtherRNA	8.12734	1.74521	7.09171	4.35008	0	0.509675	1.54833	0.850722	NA
evm.TU.utg2036_2952540_3002010__.5	AT3G22840	-4.43515	0.00111307	0.0421277	DEGs	1.62547	3.49041	3.54585	2.17504	0	0	0	0	Chlorophyll A-B binding family protein [Source:NCBI gene (formerly Entrezgene);Acc:821855]
CL.22616	NA	-4.57055	0.00110172	0.0421277	DELs	6.50187	1.74521	0	2.17504	0	0	0	0	NA
CL.28173	AT3G62290	1.56426	0.00118337	0.0442285	DEGs	4.8764	6.98083	0	4.35008	17.6622	11.7225	10.8383	14.4623	ADP-ribosylation factor A1E [Source:NCBI gene (formerly Entrezgene);Acc:825402]
CL.21377	AT4G02050	-3.48271	0.00123957	0.0457571	DEGs	6.50187	3.49041	0	5.2201	0.981235	0.509675	0	0	sugar transporter protein 7 [Source:NCBI gene (formerly Entrezgene);Acc:828154]

## Sheet: Table S3
Table S3. Correlation of differential expressed genes (DEGs) and differential expressed long noncoding RNAs (DELs) and other RNAs
gene_id	gene_type	correlated_gene	correleted_gene_type	pearson_correlation
CL.22718	DEGs	CL.29341	DELs	0.822563
CL.14955	DEGs	CL.29341	DELs	0.803072
CL.6999	DEGs	CL.29341	DELs	0.82959
CL.8087	DEGs	CL.22616	DELs	0.809974
CL.21377	DEGs	CL.22616	DELs	0.820751
CL.31779	DEGs	CL.22702	DELs	0.818244
CL.2642	DEGs	CL.6620	DELs	0.828872
CL.29541	DEGs	CL.6620	DELs	0.840558
CL.31779	DEGs	CL.29229	OtherRNA	0.851152
CL.8087	DEGs	CL.23364	OtherRNA	0.87703
CL.21420	DEGs	CL.23364	OtherRNA	0.867147
CL.8087	DEGs	CL.14956	OtherRNA	0.864097
CL.21420	DEGs	CL.14956	OtherRNA	0.87722
CL.22718	DEGs	CL.14956	OtherRNA	0.805155
CL.21377	DEGs	CL.14956	OtherRNA	0.805164
CL.21420	DEGs	CL.29964	OtherRNA	0.820592
CL.8087	DEGs	CL.29964	OtherRNA	0.822177
CL.11525	DEGs	CL.16392	OtherRNA	0.824841
CL.32966	DEGs	CL.16398	OtherRNA	0.870541
CL.21420	DEGs	CL.16407	OtherRNA	0.832251
evm.TU.utg2036_2952540_3002010__.5	DEGs	CL.16407	OtherRNA	0.80343
CL.14960	DEGs	CL.29301	OtherRNA	0.835927
evm.TU.utg2036_2952540_3002010__.5	DEGs	CL.4379	OtherRNA	0.823678
CL.31779	DEGs	CL.4379	OtherRNA	0.845458
CL.25293	DEGs	CL.4379	OtherRNA	0.811974
CL.8087	DEGs	CL.23615	OtherRNA	0.811744
CL.12887	DEGs	CL.7362	OtherRNA	0.808021
CL.25293	DEGs	CL.7362	OtherRNA	0.805104
CL.8087	DEGs	CL.5950	OtherRNA	0.879578
CL.21420	DEGs	CL.5950	OtherRNA	0.843351
CL.8087	DEGs	CL.4006	OtherRNA	0.812634
CL.22718	DEGs	CL.4006	OtherRNA	0.881454
CL.21420	DEGs	CL.4006	OtherRNA	0.832867
CL.22702	DELs	CL.29229	OtherRNA	0.819699
CL.21025	DELs	CL.16392	OtherRNA	0.815186
CL.21025	DELs	CL.7362	OtherRNA	0.803666
CL.22616	DELs	CL.5950	OtherRNA	0.805994

## Sheet: Table S4
Table S4. Expression count values for 8 short read RNA-seq libraries
gene_id	log2FoldChange	pvalue	padj	L1_counts	L2_counts	L3_counts	L4_counts	W1_counts	W2_counts	W3_counts	W4_counts
CL.1	0.366025	0.182385	0.541131	549.858	820.936	834.011	815.243	984.054	1134.31	917.634	858.654
CL.10	-0.192821	0.629976	0.91083	617.558	277.012	298.586	322.721	318.887	357.931	385.406	262.906
CL.100	6.16374	NA	NA	0	0	0	0	0	0	62.9235	0
CL.1000	-0.209073	0.364491	0.754382	8388.23	4968.9	5569.1	7907.16	5727.32	7072.28	5170.21	5241.29
CL.10000	0.504205	NA	NA	0	82.2379	0	3.97195	108.169	0	7.86543	5.82797
CL.10001	0.727314	0.626923	0.909381	3.30245	83.6807	6.76682	21.8457	139.074	2.21401	49.8144	0
CL.10002	-2.2529	NA	NA	0	41.8403	0	0	3.51197	0	0	5.18042
CL.10003	-0.952752	0.623071	0.907901	0	36.0693	0	73.4811	26.691	0	26.2181	3.88531
CL.10004	0.882559	NA	NA	0	54.8253	0	13.9018	126.431	0	0	0
CL.10005	1.76131	NA	NA	0	70.6957	0	11.9158	252.862	17.7121	0	9.06573
CL.10006	-2.06332	0.295623	0.690935	62.7466	47.6114	0	19.8597	1.40479	0	30.1508	0
CL.10007	-1.78926	NA	NA	0	0	0	48.6564	14.0479	0	0	0
CL.10008	1.4485	0.657693	NA	0	11.5422	0	0	0	0	31.4617	0
CL.10009	-2.50771	0.205835	0.577639	0	128.407	0	65.5372	21.0718	0	13.1091	0
CL.1001	0.278955	0.800146	0.961541	42.9319	0	89.6604	39.7195	47.7628	69.3722	55.058	37.558
CL.10010	-0.805701	0.747126	0.946702	23.1172	160.148	0	49.6494	109.574	0	23.5963	0
CL.10011	-7.19227	0.00495545	0.0564634	49.5368	14.4277	0	23.8317	0	0	0	0
CL.10012	-0.92464	0.68056	0.928989	0	40.3976	0	21.8457	18.2623	1.476	13.1091	0
CL.10013	1.74002	0.354484	0.745746	0	36.0693	5.07512	6.95091	123.621	0	36.7053	0
CL.10014	0.448658	0.762976	0.951917	0	174.575	0	12.9088	183.325	7.38002	41.949	22.6643
CL.10015	-0.269236	NA	NA	0	66.3674	0	0	47.0604	0	7.86543	0
CL.10016	-0.227758	0.94125	0.991066	0	21.6416	0	11.9158	0	0	28.8399	0
CL.10017	-3.94002	0.0910329	0.357476	0	98.1084	0	11.9158	6.32155	0.738002	0	0
CL.10018	-0.175846	0.886096	0.979486	9.90735	245.271	0	43.6914	162.955	28.0441	47.1926	25.9021
CL.10019	0.791545	0.805541	0.962965	0	86.5662	0	0	102.55	0	44.5708	2.59021
CL.1002	-0.477326	0.599057	0.899049	247.684	23.0843	25.3756	139.018	193.861	32.4721	57.6798	27.8447
CL.10020	2.12192	NA	NA	0	10.0994	0	0	43.5484	0	0	0
CL.10021	-1.72881	0.462112	0.82558	0	56.268	0	25.8177	16.8575	0	0	7.77062
CL.10022	-6.6391	0.0410269	0.22991	0	0	45.6761	13.9018	0	0	0	0
CL.10023	-0.368005	NA	NA	0	173.132	16.9171	0	139.776	7.38002	0	0
CL.10024	2.31968	0.309836	0.705989	0	2.88554	0	10.9229	49.87	0	13.1091	6.47552
CL.10025	2.25012	NA	NA	0	8.65662	0	0	40.7389	0	0	0
CL.10026	-1.22729	0.602906	0.899947	0	54.8253	0	27.8036	2.80958	0	32.7726	0
CL.10027	-0.46662	0.823697	0.967117	59.4441	222.187	0	48.6564	191.051	0	44.5708	3.23776
CL.10028	6.41452	0.0357023	0.212278	0	0	0	0	48.4652	0	26.2181	0
CL.10029	-1.21836	0.549397	0.874342	0	83.6807	0	13.9018	14.0479	4.42801	23.5963	0
CL.1003	1.42289	0.609359	0.902818	0	0	6.76682	8.93689	12.6431	0	0	29.7874
CL.10030	1.09889	0.603491	0.900128	0	46.1687	0	11.9158	74.4538	0	49.8144	0
CL.10031	-6.54533	0.0500554	0.25683	33.0245	23.0843	0	0	0	0	0	0
CL.10032	1.37915	0.47862	0.836063	6.6049	40.3976	0	5.95792	110.978	0	26.2181	0
CL.10033	1.34878	NA	NA	0	17.3132	0	0.992987	46.358	0	0	0
CL.10034	1.84663	0.411081	0.790599	0	2.88554	13.5336	3.97195	50.5724	0	23.5963	0
CL.10035	-6.03758	0.0417221	0.231896	56.1417	0	0	8.93689	0	0.738002	0	0
CL.10036	-1.89937	0.343571	0.738386	13.2098	300.096	13.5336	100.292	103.954	0	0	10.3608
CL.10037	3.40134	0.308987	NA	0	0	3.38341	0	0	0	31.4617	5.82797
CL.10038	-2.12844	NA	NA	0	164.476	0	6.95091	36.5245	0	2.62181	0
CL.10039	-1.31072	0.528884	0.861723	0	72.1385	9.30438	13.9018	2.10718	0	36.7053	0
CL.1004	4.071	0.0533234	0.265217	0	0	5.07512	0	43.5484	1.476	15.7309	29.7874
CL.10040	-1.73071	0.513587	0.8555	0	83.6807	0	0	14.7503	0	10.4872	0
CL.10041	-5.27843	0.0107072	0.0971854	46.2343	77.9096	0	16.8808	3.51197	0	0	0
CL.10042	-7.06849	0.00908333	0.0872414	1.65123	24.5271	54.1346	0	0	0	0	0
CL.10043	0.663996	0.805736	0.962965	0	197.66	0	17.8738	273.231	0	62.9235	5.18042
CL.10044	1.28772	NA	NA	0	28.8554	0	8.93689	92.0136	0	0	0
CL.10045	1.34674	0.519544	0.857676	0	49.0542	0	6.95091	87.0969	0	55.058	0
CL.10046	0.498125	0.747243	0.946775	0	103.879	0	43.6914	125.729	1.476	68.1671	12.951
CL.10047	-1.52518	0.63685	0.913858	0	222.187	0	32.7686	88.5017	0	0	0
CL.10048	-0.36694	0.907727	0.982665	0	109.651	0	27.8036	97.6328	8.85603	0	0
CL.10049	-2.27147	NA	NA	0	4.32831	0	64.5442	7.72634	0	1.31091	5.18042
CL.1005	5.27568	0.119766	NA	0	0	0	0	0	0	34.0835	0
CL.10050	0.974729	0.685031	0.930486	0	20.1988	0	13.9018	49.1676	17.7121	0	0
CL.10051	-1.08927	0.640337	0.91532	39.6294	40.3976	0	0	30.9053	0	0	6.47552
CL.10052	-6.55079	NA	NA	0	56.268	0	0	0	0	0	0
CL.10053	0.864569	0.543045	0.870744	0	115.422	6.76682	56.6003	253.564	0	31.4617	40.1482
CL.10054	-0.248249	0.893548	0.979971	29.7221	34.6265	0	18.8668	63.2155	0	1.31091	5.18042
CL.10055	1.165	0.435737	0.806914	0	77.9096	16.9171	9.92987	113.085	0	110.116	11.6559
CL.10056	1.19785	0.631795	0.911439	0	0	0	41.7055	82.8825	0	13.1091	0
CL.10057	-7.01374	0.00849933	0.0840256	0	56.268	9.30438	11.9158	0	0	0	0
CL.10058	0.399951	NA	NA	0	0	9.30438	41.7055	67.4298	0	0	0
CL.10059	0.133467	0.952815	0.993832	0	416.961	20.3005	67.5231	418.627	0	131.091	3.88531
CL.1006	0.874963	0.0879177	0.349264	85.8637	72.1385	153.945	131.074	192.456	156.456	246.45	220.168
CL.10060	0.604661	0.851491	0.972934	0	132.735	0	18.8668	75.8586	0	154.687	0
CL.10061	-0.967002	0.661707	0.922215	0	83.6807	0	15.8878	27.3934	0	23.5963	0
CL.10062	1.81833	0.462496	0.82558	0	20.1988	0	0	30.9053	0	36.7053	3.23776
CL.10063	0.746178	0.709027	0.937353	13.2098	49.0542	0	1.98597	40.7389	0	66.8562	0
CL.10064	-2.32618	0.088255	0.34993	122.191	79.3524	30.4507	69.5091	16.1551	0	44.5708	0
CL.10065	-0.150196	0.936417	0.990554	0	86.5662	1.69171	30.7826	74.4538	0	32.7726	0
CL.10066	0.217098	0.901662	0.981817	0	98.1084	8.45853	29.7896	140.479	17.7121	0	0
CL.10067	0.222433	0.866427	0.976272	72.6539	31.7409	1.69171	74.474	116.597	2.95201	90.4525	0.647552
CL.10068	0.603418	0.847656	0.971805	0	34.6265	0	85.3969	146.098	0	0	36.2629
CL.10069	1.08648	0.619777	0.906497	0	53.3825	0	2.97896	98.3352	0	20.9745	0
CL.1007	0.157859	0.438457	0.808971	1849.37	2094.9	1772.91	1751.63	2093.13	2084.12	2016.17	2136.92
CL.10070	2.61766	0.260397	0.654912	0	0	0	24.8247	137.669	0	15.7309	0
CL.10071	1.33492	0.618936	0.906497	0	7.21385	0	12.9088	9.13113	0	41.949	0
CL.10072	-0.978549	0.698021	0.934355	46.2343	184.675	0	80.432	147.503	0	0	10.3608
CL.10073	0.163848	0.913414	0.983214	0	66.3674	3.38341	56.6003	106.764	28.0441	5.24362	1.2951
CL.10074	-5.04638	NA	NA	0	89.4518	0	5.95792	2.80958	0	0	0
CL.10075	-0.0179297	0.995414	0.999376	0	95.2228	0	29.7896	72.3466	0	51.1253	0
CL.10076	0.562811	NA	NA	0	89.4518	0	7.9439	132.05	0	0	11.6559
CL.10077	-1.01793	0.411659	0.79109	39.6294	144.277	0	53.6213	40.7389	7.38002	41.949	27.1972
CL.10078	2.43415	0.223416	0.605459	0	1.44277	0	19.8597	30.203	0	62.9235	23.3119
CL.10079	0.919752	0.663371	0.922628	0	37.512	0	0	25.9886	13.284	26.2181	5.18042
CL.1008	1.39024	0.17111	0.521105	0	15.8705	76.1268	55.6073	60.4059	64.9442	136.334	128.215
CL.10080	2.16975	0.285423	0.682097	0	5.77108	0	15.8878	13.3455	0	48.5035	36.2629
CL.10081	-1.69675	0.361564	0.751899	112.283	11.5422	0	32.7686	35.1197	0	13.1091	0
CL.10082	-0.546209	0.830929	0.968813	0	53.3825	0	0.992987	9.83352	0	0	27.1972
CL.10083	-0.00316929	0.998756	0.999633	39.6294	194.774	20.3005	60.5722	261.993	0	52.4362	0
CL.10084	-0.728778	0.707792	0.937142	0	108.208	0	7.9439	47.7628	0	5.24362	16.8363
CL.10085	1.42609	0.540887	0.869608	0	33.1837	18.6088	0	139.074	0	0	0
CL.10086	0.359709	0.853583	0.973708	0	60.5964	0	29.7896	105.359	0	1.31091	9.06573
CL.10087	0.343129	0.841484	0.970919	85.8637	38.9548	0.845853	1.98597	64.6203	0	97.007	0
CL.10088	-1.42037	0.653757	0.918947	0	5.77108	0	35.7475	0	0	15.7309	0
CL.10089	-1.45347	0.426878	0.801049	0	109.651	0	47.6634	43.5484	5.90402	0	7.77062
CL.1009	-0.294485	0.78599	0.957799	0	222.187	88.8145	63.5512	70.2394	8.85603	72.0998	154.117
CL.10090	1.35914	0.49654	0.847024	0	25.9699	0	15.8878	75.8586	0	28.8399	2.59021
CL.10091	-1.17754	0.71525	0.938759	0	210.644	25.3756	313.784	243.028	0	0	0
CL.10092	-0.350379	0.902287	0.981829	0	34.6265	0	11.9158	0	0	36.7053	0
CL.10093	-0.063512	NA	NA	19.8147	18.756	20.3005	0	4.21437	0	52.4362	0
CL.10094	-4.76392	0.0499463	0.256501	23.1172	50.497	8.45853	0	0	2.95201	0	0
CL.10095	2.47964	0.209731	0.584096	0	5.77108	0	14.8948	78.6682	0	26.2181	11.0084
CL.10096	6.34977	0.0392547	0.22434	0	0	0	0	50.5724	0	0	20.7217
CL.10097	0.878697	NA	NA	0	21.6416	0	5.95792	50.5724	0	0	0
CL.10098	-0.830404	0.561219	0.881017	0	131.292	11.8419	147.955	110.276	0	10.4872	42.7384
CL.10099	2.05068	0.261052	0.655232	0	14.4277	0	19.8597	39.3341	0	68.1671	34.9678
CL.101	-0.0402829	0.89669	0.980589	577.929	623.277	779.876	803.327	441.104	772.688	765.569	731.086
CL.1010	-0.841143	NA	NA	59.4441	0	0	0	33.0125	0	0	0
CL.10100	0.813699	0.745099	0.945893	0	148.605	0	57.5933	209.313	0	128.469	24.607
CL.10101	-0.215468	0.946808	0.99173	0	109.651	5.07512	79.439	167.17	0	0	0
CL.10102	-1.48024	0.538136	0.867565	0	98.1084	0	19.8597	42.1437	0	0	0
CL.10103	2.40212	NA	NA	0	21.6416	0	0	110.978	0	0	2.59021
CL.10104	0.941315	0.650429	0.917621	0	14.4277	11.8419	21.8457	89.9065	0	2.62181	0
CL.10105	5.63891	NA	NA	0	0	0	0	43.5484	0	0	0
CL.10106	-4.3617	0.0942887	0.367011	0	34.6265	0	57.5933	0	4.42801	0	0
CL.10107	0.510885	NA	NA	0	4.32831	0	52.6283	74.4538	2.95201	0	3.88531
CL.10108	2.54656	0.440069	NA	0	0	0	5.95792	1.40479	0	34.0835	0
CL.10109	2.19619	NA	NA	0	10.0994	0.845853	0	2.80958	0	47.1926	0
CL.1011	-1.61332	NA	NA	108.981	0	0.845853	1.98597	0	10.332	1.31091	24.607
CL.10110	-0.685525	NA	NA	3.30245	275.569	0	22.8387	158.741	0	15.7309	12.951
CL.10111	-0.0343393	0.982823	0.998424	13.2098	367.906	0	111.215	279.553	26.5681	131.091	43.386
CL.10112	2.2443	0.384311	0.77203	0	12.9849	0	0	21.7742	0	31.4617	7.77062
CL.10113	0.0814418	0.974284	0.99737	0	10.0994	0	31.7756	36.5245	0	0	7.77062
CL.10114	1.52104	NA	NA	0	37.512	0	5.95792	108.871	7.38002	2.62181	5.18042
CL.10115	0.998595	NA	NA	0	21.6416	0	0	0	0	43.2599	0
CL.10116	-5.02504	0.0585136	0.2793	0	51.9397	0	35.7475	0	0	0	2.59021
CL.10117	-0.897759	0.599124	0.899049	0	100.994	8.45853	104.264	88.5017	0	26.2181	0
CL.10118	2.50199	0.194552	0.560039	0	14.4277	6.76682	0	53.382	0	52.4362	14.2461
CL.10119	-0.452305	NA	NA	0	2.88554	0	29.7896	23.8814	0	0	0
CL.1012	-6.2644	NA	NA	46.2343	0	0	0	0	0	0	0
CL.10120	-0.34175	NA	NA	0	86.5662	0	0	68.1322	0	0	0
CL.10121	0.870899	0.659452	0.921111	0	15.8705	8.45853	31.7756	96.228	0	0	6.47552
CL.10122	1.44547	0.429584	0.802461	0	46.1687	3.38341	17.8738	154.527	0	28.8399	0
CL.10123	-0.0375213	0.987456	0.998424	1.65123	25.9699	0	11.9158	9.83352	0	0	28.4923
CL.10124	21.2627	NA	NA	0	0	0	0	88.5017	0	0	0
CL.10125	-1.52455	0.462489	0.82558	52.8392	53.3825	0	31.7756	47.7628	0	0	0
CL.10126	-5.51087	0.0333935	0.203916	3.30245	20.1988	0	49.6494	1.40479	0	0	0
CL.10127	1.07017	NA	NA	0	0	1.69171	43.6914	95.5256	0	0	0
CL.10128	-0.10506	0.968534	0.996212	0	40.3976	0	14.8948	51.2748	0	0	0
CL.10129	-0.165775	0.924446	0.987407	0	73.5813	0	34.7546	68.8346	1.476	23.5963	2.59021
CL.1013	1.6233	0.00682965	0.0719201	7701.32	4784.23	23191.6	12297.2	34226.3	15979.2	59926.7	37673.3
CL.10130	-1.97135	0.513791	0.855565	0	109.651	16.0712	89.3689	54.7868	0	0	0
CL.10131	3.10376	0.229203	0.613958	0	0	0	10.9229	80.7753	0	0	14.2461
CL.10132	0.400328	0.853757	0.973789	0	49.0542	3.38341	1.98597	61.1083	0	10.4872	0
CL.10133	2.22657	0.328584	0.724283	0	0	10.1502	10.9229	70.9418	0	28.8399	0
CL.10134	-0.142189	NA	NA	0	0	0	38.7265	35.1197	0	0	0
CL.10135	1.90659	0.361266	0.75177	0	20.1988	18.6088	0	111.681	0	34.0835	0
CL.10136	-1.33037	0.511766	0.854961	19.8147	20.1988	5.07512	50.6424	37.9293	0	0	0
CL.10137	0.551896	0.841441	0.970919	0	37.512	0	0	18.2623	0	36.7053	0
CL.10138	1.68596	0.462651	0.825665	0	11.5422	0	9.92987	61.8107	0	5.24362	1.94266
CL.10139	0.369071	NA	NA	0	0	0	34.7546	44.9532	0	0	0
CL.1014	5.60844	0.0979937	NA	0	0	0	0	30.9053	0	11.7981	0
CL.10140	0.0308849	0.99229	0.999076	0	125.521	0	23.8317	76.561	0	76.0325	0
CL.10141	-0.0275136	0.993208	0.999223	0	75.0241	0	36.7405	109.574	0	0	0
CL.10142	-0.933602	0.589791	0.894313	52.8392	70.6957	0	27.8036	73.049	0	5.24362	0.647552
CL.10143	2.5581	NA	NA	0	12.9849	0	0	75.8586	0	0	0
CL.10144	4.40416	0.0505793	0.258288	0	0	0	7.9439	140.479	0	31.4617	0
CL.10145	0.0415873	0.980933	0.998293	26.4196	103.879	0	1.98597	110.978	0	1.31091	23.3119
CL.10146	2.3201	NA	NA	0	33.1837	0	0	161.551	3.69001	0	0
CL.10147	0.526462	0.723554	0.940762	0	102.437	15.2254	20.8527	131.348	0	52.4362	15.5412
CL.10148	0.16313	0.94313	0.991066	0	442.93	18.6088	140.011	374.376	2.95201	296.265	0
CL.10149	2.67952	NA	NA	4.95368	0	0	0	28.0958	0	0	2.59021
CL.1015	-2.32613	NA	NA	46.2343	0	0	0	9.13113	0	0	0
CL.10150	0.360857	0.838819	0.970376	29.7221	57.7108	0	42.6985	161.551	0	0	5.18042
CL.10151	1.84231	0.459071	0.823537	0	0	0	28.7966	92.716	0	0	11.0084
CL.10152	1.10451	NA	NA	0	0	0	19.8597	42.846	0	0	0
CL.10153	5.42666	0.109456	NA	0	0	0	0	6.32155	0	31.4617	0
CL.10154	-0.258399	0.919296	0.985145	0	31.7409	0	16.8808	37.9293	0	2.62181	0
CL.10155	0.626292	0.772451	0.954345	0	25.9699	0	19.8597	38.6317	0.738002	31.4617	0
CL.10156	-1.35716	0.603946	0.900128	0	243.828	0	71.4951	98.3352	0	2.62181	22.0168
CL.10157	0.919403	0.777739	NA	0	17.3132	0	0	0	0	32.7726	0
CL.10158	6.49802	0.0311073	0.195517	0	0	0	0	71.6442	7.38002	0	0
CL.10159	-7.71475	0.000374355	0.00736691	0	121.193	0	86.3899	0	0	1.31091	0
CL.1016	5.63765	NA	NA	1.65123	0	0	0	69.537	2.21401	0	0
CL.10160	1.34439	0.533822	0.864563	0	51.9397	0	0	75.1562	0	55.058	1.2951
CL.10161	1.86078	NA	NA	0	8.65662	3.38341	15.8878	99.74	0	0	1.94266
CL.10162	-0.410148	0.898982	0.980914	0	118.307	0	36.7405	116.597	0	0	0
CL.10163	-0.0574628	0.985815	0.998424	0	49.0542	0	63.5512	108.169	0	0	0
CL.10164	0.506735	0.802471	0.962392	0	34.6265	0.845853	31.7756	22.4766	0	73.4107	0
CL.10165	-0.769071	0.72933	0.941816	19.8147	47.6114	2.53756	0	39.3341	1.476	0	0
CL.10166	-2.32736	0.259608	0.653923	33.0245	27.4126	4.22926	27.8036	18.2623	0	0	0
CL.10167	1.04275	0.71067	0.937738	0	14.4277	0	5.95792	2.80958	0	39.3272	0
CL.10168	-0.541329	NA	NA	0	0	0	45.6774	28.7982	0	2.62181	0
CL.10169	2.06729	0.522219	0.858821	0	95.2228	0	5.95792	318.887	0	104.872	0
CL.1017	5.54283	NA	NA	0	0	0	0	40.7389	0	0	0
CL.10170	-2.25332	NA	NA	0	80.7951	0	0	16.8575	0	0	0
CL.10171	1.27461	0.522405	0.858821	1.65123	24.5271	0	37.7335	153.122	1.476	0	0
CL.10172	1.06392	0.615352	0.905507	0	23.0843	0	33.7616	56.1915	0	62.9235	0
CL.10173	-0.436892	NA	NA	0	5.77108	0	65.5372	52.6796	0	0	0
CL.10174	0.575847	0.762466	0.951756	0	30.2982	5.92097	51.6353	125.729	0	5.24362	0
CL.10175	1.3316	0.606868	0.901751	0	20.1988	0	13.9018	85.6921	0	0	0
CL.10176	2.69988	NA	NA	0	25.9699	0.845853	0	3.51197	0	170.418	0
CL.10177	2.14667	0.232848	0.618493	0	31.7409	0.845853	19.8597	111.681	0	120.603	0
CL.10178	0.999443	0.736695	0.943884	0	0	0	22.8387	39.3341	0	0	6.47552
CL.10179	-1.1222	NA	NA	56.1417	20.1988	10.1502	11.9158	44.9532	0	0	0
CL.1018	-6.04115	0.0749949	NA	39.6294	0	0	0	0	0	0	0
CL.10180	-0.632441	NA	NA	0	238.057	6.76682	21.8457	169.277	0	2.62181	0
CL.10181	-2.23922	0.488889	0.842422	0	83.6807	0	92.3478	37.2269	0	0	0
CL.10182	-2.5128	0.0786942	0.326025	0	108.208	84.5853	53.6213	0	14.76	20.9745	7.77062
CL.10183	-4.94083	0.0071111	0.0740977	0	23.0843	126.878	74.474	0	0	7.86543	0
CL.10184	0.616756	0.817869	0.965588	0	27.4126	0	13.9018	63.2155	0	0	0
CL.10185	-0.060495	0.962717	0.994992	0	54.8253	27.0673	115.187	84.9897	10.332	91.7634	2.59021
CL.10186	-1.57267	0.493217	0.845213	0	47.6114	0	43.6914	26.691	0	0	3.88531
CL.10187	-4.93392	0.0975274	0.374995	0	56.268	0	7.9439	0	0	2.62181	0
CL.10188	-3.13149	0.183133	0.542686	0	34.6265	0	59.5792	5.61915	0	5.24362	0
CL.10189	0.230188	NA	NA	0	0	0	37.7335	0	0	44.5708	0
CL.1019	-6.65785	NA	NA	0	60.5964	0	0	0	0	0	0
CL.10190	-1.1935	0.307165	0.704153	115.586	135.62	40.6009	64.5442	63.2155	0	89.1416	3.88531
CL.10191	-4.21575	0.143233	0.473203	0	18.756	0	47.6634	3.51197	0	0	0
CL.10192	1.18418	0.508423	0.853377	0	0	23.6839	51.6353	85.6921	0	83.8979	2.59021
CL.10193	-20.5288	NA	NA	0	0	0	63.5512	0	0	0	0
CL.10194	5.55709	NA	NA	3.30245	0	0	0	144.693	0	0	0
CL.10195	-4.66179	0.135087	0.45745	0	38.9548	0	14.8948	0	0	2.62181	0
CL.10196	0.896142	0.63937	0.915267	0	34.6265	0	19.8597	40.0365	32.4721	28.8399	0
CL.10197	-4.72932	0.0010487	0.0170875	95.7711	53.3825	16.9171	57.5933	7.02394	0	1.31091	0
CL.10198	-0.165195	NA	NA	0	57.7108	0	7.9439	51.2748	4.42801	2.62181	0
CL.10199	-1.58109	0.431667	0.80424	69.3515	12.9849	0.845853	2.97896	18.2623	0	10.4872	0
CL.102	0.0825632	0.870288	0.97629	340.152	126.964	133.645	389.251	174.194	356.455	267.425	249.955
CL.1020	5.59167	NA	NA	0	0	0	0	42.1437	0	0	0
CL.10200	0.0179544	0.995184	0.999351	0	15.8705	0	18.8668	35.1197	0	0	0
CL.10201	1.49305	NA	NA	0	5.77108	3.38341	44.6844	151.717	0	0	0
CL.10202	-5.58462	0.0266181	0.177454	0	67.8102	0	39.7195	2.10718	0	0	0
CL.10203	1.02426	0.69316	0.933257	0	11.5422	0	27.8036	80.0729	0	0	0
CL.10204	-0.0671682	0.977437	0.998116	0	46.1687	0	11.9158	43.5484	0	11.7981	0
CL.10205	1.4541	0.570331	0.884449	0	90.8945	0	3.97195	198.075	0	52.4362	9.06573
CL.10206	0.800448	0.802001	0.962229	0	93.7801	0	19.8597	116.597	0	81.2761	0
CL.10207	0.283913	0.86962	0.976272	9.90735	100.994	3.38341	1.98597	75.8586	0	65.5453	0
CL.10208	0.145368	0.938492	0.990554	0	79.3524	6.76682	11.9158	71.6442	0	36.7053	0
CL.10209	0.522023	0.841968	0.971036	0	0	0	30.7826	10.5359	0	28.8399	5.18042
CL.1021	21.0496	NA	NA	0	0	0	0	75.8586	0	0	0
CL.10210	3.27082	0.192638	0.557317	0	11.5422	0	0	22.4766	0	87.8307	0
CL.10211	-5.75288	0.0328751	0.202353	0	54.8253	0	31.7756	1.40479	0	0	0
CL.10212	-0.0506005	0.979769	0.998116	0	40.3976	0	30.7826	30.9053	0	31.4617	6.47552
CL.10213	1.29013	0.577768	0.887438	1.65123	11.5422	0	14.8948	3.51197	0	65.5453	0
CL.10214	-0.182249	0.952623	0.993832	0	23.0843	0	10.9229	0	0	30.1508	0
CL.10215	-1.31777	0.686031	NA	0	31.7409	0	0	12.6431	0	0	0
CL.10216	0.720962	0.771245	0.953998	0	30.2982	0	5.95792	12.6431	0	47.1926	0
CL.10217	-2.3209	0.414693	0.793128	49.5368	15.8705	0	0	0	0	0	12.951
CL.10218	-4.93619	0.124189	NA	0	17.3132	0	31.7756	1.40479	0	0	0
CL.10219	-0.514971	0.748768	0.947284	92.4686	92.3373	0	13.9018	87.0969	0	51.1253	0.647552
CL.1022	5.32903	NA	NA	0	0	0	0	35.1197	0	0	0
CL.10220	0.484982	0.849769	0.972497	0	23.0843	0	11.9158	44.9532	0	0	3.88531
CL.10221	21.1964	NA	NA	0	0	0	0	84.2873	0	0	0
CL.10222	1.475	0.627585	0.909727	0	0	0	16.8808	39.3341	0	7.86543	0
CL.10223	6.3611	0.0395956	0.225296	0	0	0	0	47.0604	0	24.9072	0
CL.10224	6.13327	NA	NA	0	0	0	0	0	0	61.6125	0
CL.10225	-1.516	0.635653	0.913284	0	226.515	0	16.8808	60.4059	0	0	24.607
CL.10226	1.06989	0.672026	0.92651	0	27.4126	0	0	35.1197	10.332	11.7981	0
CL.10227	2.05993	0.415777	0.793503	0	2.88554	0	13.9018	53.382	0	17.0418	0
CL.10228	-0.468922	0.770026	0.953864	6.6049	75.0241	6.76682	5.95792	14.7503	0	45.8817	7.77062
CL.10229	0.467789	0.788576	0.958418	28.0708	12.9849	0	14.8948	61.8107	0.738002	11.7981	2.59021
CL.1023	5.49228	NA	NA	0	0	0	0	39.3341	0	0	0
CL.10230	0.856308	0.791029	0.958939	0	93.7801	0	1.98597	92.0136	0	81.2761	0
CL.10231	5.11183	NA	NA	0	0	0	0	30.203	0	0	0
CL.10232	2.89041	NA	NA	0	5.77108	0	0	42.1437	0	0	0
CL.10233	-0.974693	0.617856	0.905879	0	73.5813	0	36.7405	19.667	0	34.0835	2.59021
CL.10234	1.64669	NA	NA	0	2.88554	20.3005	0	66.0251	0	0	7.12307
CL.10235	0.558893	0.822952	0.966969	6.6049	31.7409	0	0	37.9293	0	18.3527	0
CL.10236	-1.50957	0.561371	0.881079	0	50.497	0	31.7756	28.7982	0	0	0
CL.10237	-0.701997	0.694778	0.933784	0	54.8253	6.76682	93.3408	63.9179	0	31.4617	0
CL.10238	-0.028426	0.99075	0.998826	0	77.9096	0	0	52.6796	0	23.5963	0
CL.10239	-4.03555	0.126877	0.441029	0	49.0542	0	37.7335	0	0	0	5.18042
CL.1024	0.398669	0.145056	0.476605	710.027	1260.98	1016.72	1216.41	1375.29	1145.38	1671.4	1354.03
CL.10240	1.34646	0.699766	NA	0	0	0	0	2.10718	0	0	0
CL.10241	0.175102	0.960481	NA	0	0	0	0	0.702394	0	0	0
CL.10242	2.69659	0.431613	NA	0	0	0	0	5.61915	0	0	0
CL.10243	-0.27537	0.932076	0.989124	0	150.048	0	0	84.9897	0	0	38.8531
CL.10244	3.85918	0.25689	NA	0	0	0	0	12.6431	0	0	0
CL.10245	-0.447731	0.856658	0.974893	0	28.8554	0	23.8317	20.3694	0	18.3527	0
CL.10246	-0.192215	0.952583	0.993832	0	36.0693	0	71.4951	94.1208	0	0	0
CL.10247	NA	NA	NA	0	0	0	0	0	0	0	0
CL.10248	-1.24996	0.607963	0.902418	0	57.7108	0	14.8948	0	0	27.529	3.23776
CL.10249	1.86491	0.372561	0.761511	0	17.3132	0	21.8457	87.7993	0	55.058	0
CL.1025	-0.0588221	0.797863	0.961197	1462.99	1992.47	1526.76	1767.52	1379.5	1681.17	1613.72	1805.37
CL.10250	NA	NA	NA	0	0	0	0	0	0	0	0
CL.10251	-2.75819	0.427352	NA	0	0	0	3.97195	0	0	0	0
CL.10252	-0.596124	0.857453	NA	0	8.65662	0	0	5.61915	0	0	0
CL.10253	-4.36677	0.199272	NA	0	18.756	1.69171	0	0.702394	0	0	0
CL.10254	-0.0937988	0.949534	0.99274	3.30245	72.1385	5.07512	34.7546	90.6089	1.476	1.31091	14.2461
CL.10255	-0.181193	0.958026	NA	0	0	0	2.97896	0	1.476	1.31091	0
CL.10256	-7.95038	0.00125568	0.0197945	0	54.8253	0	93.3408	0	0	0	0
CL.10257	-1.56495	0.636765	NA	0	11.5422	0	1.98597	0	0	1.31091	3.23776
CL.10258	-1.47922	0.547604	0.873425	0	53.3825	0	1.98597	11.9407	0	1.31091	6.47552
CL.10259	2.91836	0.0547773	0.268324	0	11.5422	1.69171	9.92987	132.05	6.64202	34.0835	2.59021
CL.1026	0.192379	0.339621	0.734278	2762.5	3260.66	2847.99	3044.5	3266.84	3402.19	4007.44	2941.83
CL.10260	-1.85317	0.544769	0.871703	0	8.65662	0	39.7195	13.3455	0	0	0
CL.10261	3.9126	NA	NA	0	4.32831	0	0	63.9179	0	0	0
CL.10262	2.54384	0.169318	0.518757	0	12.9849	0	10.9229	70.2394	0	44.5708	24.607
CL.10263	-4.0038	0.182976	0.542342	0	24.5271	0	32.7686	3.51197	0	0	0
CL.10264	-1.13744	0.593994	0.89653	0	40.3976	3.38341	31.7756	16.1551	0	18.3527	0
CL.10265	0.623639	0.736417	0.943884	16.5123	86.5662	0	0	114.49	0	41.949	1.94266
CL.10266	-1.19606	0.417179	0.794258	33.0245	100.994	0	43.6914	33.7149	1.476	40.6381	1.94266
CL.10267	1.47959	0.458349	0.823021	0	44.7259	0	0.992987	22.4766	0	95.6961	9.06573
CL.10268	-5.82905	0.00574375	0.0631994	0	88.009	14.3795	29.7896	0	2.21401	0	0
CL.10269	NA	NA	NA	0	0	0	0	0	0	0	0
CL.1027	1.39192	0.380921	0.769224	0	5.77108	27.9131	29.7896	39.3341	14.76	114.049	0
CL.10270	0.150851	0.951102	0.993434	0	27.4126	0	21.8457	51.9772	0	2.62181	0
CL.10271	-3.81525	0.263274	NA	0	12.9849	0	0.992987	0.702394	0	0	0
CL.10272	NA	NA	NA	0	0	0	0	0	0	0	0
CL.10273	0.126876	0.964604	0.995454	0	24.5271	0	14.8948	0	0	43.2599	0
CL.10274	1.84782	0.506219	0.851715	0	18.756	0	0	34.4173	0	32.7726	0
CL.10275	1.4739	0.604066	0.900159	0	0	0	20.8527	29.5006	0	28.8399	0
CL.10276	NA	NA	NA	0	0	0	0	0	0	0	0
CL.10277	0.0145158	0.993855	0.999321	0	80.7951	0.845853	43.6914	117.3	0	0	9.06573
CL.10278	-1.02047	0.57008	0.884273	13.2098	70.6957	0	23.8317	6.32155	0	44.5708	2.59021
CL.10279	-0.337467	0.884758	0.979288	0	69.253	0	0	25.9886	0	23.5963	5.18042
CL.1028	0.311511	0.0989965	0.379104	5858.55	5355.56	5684.98	4550.86	6393.19	6392.58	7588.83	6245.64
CL.10280	-1.18069	0.593272	0.896446	0	40.3976	18.6088	36.7405	42.1437	0	0	0
CL.10281	NA	NA	NA	0	0	0	0	0	0	0	0
CL.10282	NA	NA	NA	0	0	0	0	0	0	0	0
CL.10283	2.2592	NA	NA	0	5.77108	0.845853	7.9439	64.6203	0	5.24362	0
CL.10284	2.11585	0.0941708	0.366809	0	25.9699	2.53756	31.7756	136.264	13.284	89.1416	23.3119
CL.10285	-2.70428	0.284801	0.681376	0	31.7409	0	69.5091	15.4527	0	0	0
CL.10286	-1.04728	0.748409	NA	0	14.4277	0	9.92987	1.40479	10.332	0	0
CL.10287	-1.89276	0.5423	0.870547	0	43.2831	0	3.97195	12.6431	0	0	0
CL.10288	NA	NA	NA	0	0	0	0	0	0	0	0
CL.10289	0.243814	NA	NA	0	47.6114	0	0	56.1915	0	0	0
CL.1029	0.273246	0.298033	0.693502	8916.62	4512.99	4521.08	7122.7	6907.35	10033.9	6161.25	7194.3
CL.10290	2.41193	0.424825	0.800122	0	10.0994	0	0	32.3101	0	20.9745	0
CL.10291	-1.18155	0.581396	0.888878	0	31.7409	16.9171	18.8668	23.179	0	0	6.47552
CL.10292	-3.8373	0.256883	NA	0	0	0	22.8387	1.40479	0	0	0
CL.10293	1.06525	0.617233	0.905879	0	51.9397	0	6.95091	104.657	0	0	18.1315
CL.10294	-1.29786	0.514175	0.855795	0	95.2228	8.45853	6.95091	26.691	0	18.3527	0
CL.10295	0.419817	0.871481	0.976432	0	49.0542	0	0	40.7389	0	0	24.607
CL.10296	-7.68536	0.00303814	0.0393016	0	83.6807	0	39.7195	0	0	0	0
CL.10297	-0.788041	0.660805	0.921642	0	164.476	8.45853	0	14.0479	0	68.1671	18.1315
CL.10298	-0.539611	0.792345	0.959636	0	77.9096	6.76682	3.97195	47.7628	0	13.1091	0
CL.10299	1.44855	NA	NA	0	40.3976	0	1.98597	106.062	0	0	9.06573
CL.103	5.14493	NA	NA	0	0	0	0	30.9053	0	0	0
CL.1030	-0.349819	0.905446	0.982275	0	40.3976	0	0	22.4766	0	0	9.06573
CL.10300	-0.344003	0.899187	0.980914	0	31.7409	0	6.95091	27.3934	2.95201	0	0
CL.10301	-1.14535	0.560877	0.880768	0	64.9247	0	31.7756	22.4766	13.284	0	7.77062
CL.10302	1.53613	0.521776	0.858503	0	0	0	25.8177	14.0479	0	55.058	6.47552
CL.10303	-5.12504	0.131879	NA	0	12.9849	0	7.9439	0	0	0	0
CL.10304	NA	NA	NA	0	0	0	0	0	0	0	0
CL.10305	NA	NA	NA	0	0	0	0	0	0	0	0
CL.10306	0.977088	NA	NA	0	0	0	9.92987	19.667	0	0	0
CL.10307	-3.1132	0.192911	0.557441	0	99.5512	0	33.7616	0	0	15.7309	0
CL.10308	0.318674	0.859003	0.975087	0	60.5964	0	43.6914	84.2873	0	36.7053	9.06573
CL.10309	-3.17986	0.340248	NA	0	0	0	25.8177	2.80958	0	0	0
CL.1031	0.218911	0.558537	0.879836	435.924	412.632	614.089	1235.28	681.322	866.415	731.485	863.834
CL.10310	-0.815638	0.802673	NA	0	0	0	22.8387	0	0	0	12.951
CL.10311	-1.41252	0.447511	0.815834	0	80.7951	10.1502	39.7195	37.2269	0	0	11.6559
CL.10312	1.79764	0.439387	0.809522	0	17.3132	0	8.93689	23.179	0	68.1671	0
CL.10313	-1.16289	0.395126	0.779258	0	103.879	21.9922	107.243	46.358	4.42801	52.4362	1.2951
CL.10314	-5.49615	0.0978818	NA	0	18.756	0	25.8177	0.702394	0	0	0
CL.10315	-0.0540297	0.979746	0.998116	0	34.6265	0	23.8317	42.846	8.11802	5.24362	0
CL.10316	NA	NA	NA	0	0	0	0	0	0	0	0
CL.10317	-0.130083	0.962319	0.994992	0	49.0542	0	0	36.5245	8.11802	0	0
CL.10318	0.0180518	0.993246	0.999223	0	129.849	25.3756	85.3969	184.027	0	58.9907	0.647552
CL.10319	6.0263	0.0103649	0.0954926	0	1.44277	0	0	47.7628	0	24.9072	21.3692
CL.1032	-0.0118755	0.967148	0.995622	941.199	1139.79	1444.72	1198.54	775.443	1115.86	1595.37	1203.8
CL.10320	0.694282	0.680917	0.929139	0	30.2982	8.45853	37.7335	89.9065	0	31.4617	2.59021
CL.10321	-0.147372	0.963978	NA	0	18.756	0	0	0	0	17.0418	0
CL.10322	-0.0360541	0.987805	0.998424	0	69.253	0	23.8317	90.6089	0	0	0
CL.10323	0.0518451	0.982327	0.998424	0	34.6265	0	21.8457	24.5838	0	34.0835	0
CL.10324	2.39203	0.349841	0.742504	0	18.756	0	0	70.2394	0	27.529	0
CL.10325	-0.328407	0.90318	0.98196	6.6049	246.714	0	89.3689	199.48	0	73.4107	0
CL.10326	0.549711	0.797092	0.960975	0	37.512	10.1502	25.8177	107.466	0	0	0
CL.10327	-0.703931	0.638278	0.914681	0	128.407	37.2175	28.7966	89.2041	0	18.3527	11.6559
CL.10328	-1.77461	NA	NA	0	59.1536	0	0	2.80958	0.738002	0	13.5986
CL.10329	-4.43917	0.193288	NA	0	0	0	12.9088	0	0	0	0
CL.1033	-0.813481	0.00858413	0.0846171	9686.09	3658.87	3912.92	4524.05	2478.75	4140.19	2511.69	3259.78
CL.10330	NA	NA	NA	0	0	0	0	0	0	0	0
CL.10331	0.386137	0.900691	NA	6.6049	12.9849	0	0.992987	26.691	0	0	0
CL.10332	2.04912	NA	NA	0	2.88554	0	7.9439	44.9532	0	0	0
CL.10333	5.51628	0.102953	NA	0	0	0	0	21.7742	0	14.42	3.88531
CL.10334	NA	NA	NA	0	0	0	0	0	0	0	0
CL.10335	3.3937	NA	NA	0	0	0	13.9018	147.503	0	0	0
CL.10336	1.91863	0.57931	NA	0	0	0	0	0	0	0	3.23776
CL.10337	NA	NA	NA	0	0	0	0	0	0	0	0
CL.10338	-0.0293663	0.988435	0.998424	0	28.8554	11.8419	6.95091	32.3101	0	13.1091	1.2951
CL.10339	0.230068	NA	NA	19.8147	152.934	3.38341	17.8738	208.611	0	15.7309	2.59021
CL.1034	1.55181	0.236128	0.62298	26.4196	2.88554	3.38341	25.8177	96.9304	19.1881	52.4362	2.59021
CL.10340	-0.526887	0.739666	0.944898	19.8147	20.1988	13.5336	19.8597	13.3455	0	32.7726	5.18042
CL.10341	-0.0783309	0.980504	0.998262	0	115.422	0	0	30.203	4.42801	74.7216	0
CL.10342	6.57734	0.0112295	0.100693	0	0	0	0	37.9293	0	28.8399	16.8363
CL.10343	NA	NA	NA	0	0	0	0	0	0	0	0
CL.10344	-1.02124	0.659067	0.92103	0	53.3825	0	27.8036	29.5006	0	10.4872	0
CL.10345	0.533013	0.850907	0.972726	0	0	13.5336	19.8597	48.4652	0	0	0
CL.10346	-1.01421	0.697503	0.93401	11.5586	40.3976	0	0	20.3694	0	0	5.18042
CL.10347	1.70965	0.370405	0.759544	0	8.65662	0	15.8878	54.0844	2.95201	13.1091	10.3608
CL.10348	NA	NA	NA	0	0	0	0	0	0	0	0
CL.10349	0.0594545	0.973272	0.996938	0	66.3674	9.30438	2.97896	49.1676	0	17.0418	15.5412
CL.1035	-0.155874	0.439579	0.8096	2281.99	2347.39	2721.95	2458.64	2405	2208.84	2189.21	2004.17
CL.10350	1.65711	NA	NA	0	25.9699	5.07512	0	85.6921	5.90402	0	5.82797
CL.10351	2.30134	0.455016	0.821284	0	0	0	9.92987	43.5484	0	0	5.82797
CL.10352	3.49836	0.304878	NA	0	0	0	0	9.83352	0	0	0
CL.10353	NA	NA	NA	0	0	0	0	0	0	0	0
CL.10354	-0.433037	0.893415	0.979971	0	31.7409	0	94.3338	92.716	0	0	0.647552
CL.10355	NA	NA	NA	0	0	0	0	0	0	0	0
CL.10356	1.48824	NA	NA	0	21.6416	0	0	60.4059	0	0	0
CL.10357	-1.39531	0.600532	0.899552	0	21.6416	15.2254	1.98597	14.0479	0	0	0.647552
CL.10358	0.699841	0.655283	0.91935	0	34.6265	15.2254	27.8036	61.8107	0	34.0835	30.4349
CL.10359	NA	NA	NA	0	0	0	0	0	0	0	0
CL.1036	0.193484	0.808315	0.963164	115.586	106.765	50.7512	29.7896	81.4777	19.1881	136.334	108.789
CL.10360	0.649198	0.765458	0.952394	0	69.253	0	2.97896	92.0136	0	20.9745	0
CL.10361	-0.954817	NA	NA	0	77.9096	0	2.97896	0	0	41.949	0
CL.10362	-6.25197	0.0652798	NA	0	38.9548	6.76682	0	0	0	0	0
CL.10363	NA	NA	NA	0	0	0	0	0	0	0	0
CL.10364	-1.64105	0.611312	0.904161	0	258.256	0	133.06	121.514	0	0	3.88531
CL.10365	NA	NA	NA	0	0	0	0	0	0	0	0
CL.10366	-0.0301953	0.987227	0.998424	0	60.5964	3.38341	44.6844	90.6089	0	15.7309	0
CL.10367	NA	NA	NA	0	0	0	0	0	0	0	0
CL.10368	NA	NA	NA	0	0	0	0	0	0	0	0
CL.10369	3.34638	0.275993	0.671534	0	0	5.07512	0	32.3101	0	20.9745	0
CL.1037	4.68611	0.0126427	0.109512	0	0	0	7.9439	106.764	97.4163	0	6.47552
CL.10370	-0.331884	0.808583	0.963164	3.30245	50.497	28.759	9.92987	35.8221	8.85603	2.62181	25.9021
CL.10371	-0.641594	0.781978	0.956759	0	56.268	0	15.8878	34.4173	0	0	11.6559
CL.10372	1.82895	NA	NA	0	0	10.1502	0	36.5245	0	0	0
CL.10373	-0.375136	0.822051	0.966964	0	51.9397	6.76682	65.5372	80.0729	0	10.4872	5.18042
CL.10374	-1.00525	0.755616	0.94961	0	138.506	1.69171	105.257	122.217	0	0	0
CL.10375	-2.50971	NA	NA	0	40.3976	0	0	7.02394	0	0	0
CL.10376	-3.00713	0.272091	0.668361	0	40.3976	0.845853	15.8878	7.02394	0	0	0
CL.10377	NA	NA	NA	0	0	0	0	0	0	0	0
CL.10378	-0.624903	0.720808	0.940163	0	118.307	2.53756	19.8597	80.7753	8.85603	0	1.2951
CL.10379	-5.8984	0.0822262	NA	0	15.8705	0	19.8597	0	0	0	0
CL.1038	-2.34327	0.367639	0.757225	0	54.8253	11.8419	0	0.702394	0	0	12.3035
CL.10380	NA	NA	NA	0	0	0	0	0	0	0	0
CL.10381	1.22947	0.71162	NA	0	0	0	4.96494	1.40479	0	0	10.3608
CL.10382	-5.43285	0.109854	NA	0	25.9699	0	0	0	0	0	0
CL.10383	0.51345	0.785268	0.957633	0	72.1385	0	24.8247	127.133	4.42801	6.55453	0
CL.10384	NA	NA	NA	0	0	0	0	0	0	0	0
CL.10385	-0.718715	0.751342	0.947643	0	24.5271	0	27.8036	8.42873	0	17.0418	6.47552
CL.10386	-0.890382	NA	NA	0	0	0	33.7616	0.702394	0	0	17.4839
CL.10387	-1.51307	0.612137	NA	0	17.3132	0	19.8597	0	0	1.31091	11.6559
CL.10388	-3.33555	NA	NA	0	0	0	42.6985	0	2.95201	1.31091	0
CL.10389	NA	NA	NA	0	0	0	0	0	0	0	0
CL.1039	-0.0657333	0.831807	0.969186	961.013	865.662	1640.95	1187.61	686.942	1202.94	1342.37	1219.99
CL.10390	NA	NA	NA	0	0	0	0	0	0	0	0
CL.10391	-4.75357	0.159969	NA	0	36.0693	0	4.96494	0	0	0	1.2951
CL.10392	-1.55858	0.496509	0.847024	6.6049	30.2982	0	22.8387	9.83352	10.332	0	0
CL.10393	-1.25212	0.597596	0.897644	6.6049	24.5271	0	18.8668	9.83352	0	0	11.0084
CL.10394	0.523736	0.755822	0.949619	0	108.208	0	27.8036	130.645	0	41.949	22.6643
CL.10395	-5.298	0.118429	NA	0	38.9548	0	0	0	0	0	0.647552
CL.10396	-1.42633	0.4002	0.781871	0	184.675	0	61.5652	49.1676	0	36.7053	5.82797
CL.10397	0.291036	0.895094	0.979971	0	20.1988	0	23.8317	33.0125	0	18.3527	2.59021
CL.10398	0.426635	NA	NA	0	0	0	20.8527	28.0958	0	0	0
CL.10399	-4.54368	0.0752563	0.319353	0	76.4668	0	23.8317	4.21437	0	0	0
CL.104	5.54283	NA	NA	0	0	0	0	40.7389	0	0	0
CL.1040	6.16897	0.0565735	0.273041	0	0	0	0	54.7868	8.11802	0	0
CL.10400	-0.387694	0.805591	0.962965	66.049	73.5813	0	27.8036	105.359	0	18.3527	3.88531
CL.10401	2.24503	0.507891	NA	0	0	0	1.98597	0	0	6.55453	4.53286
CL.10402	NA	NA	NA	0	0	0	0	0	0	0	0
CL.10403	-1.79122	0.38159	0.76959	0	89.4518	0	15.8878	7.72634	0	19.6636	3.23776
CL.10404	-0.391883	0.83153	0.969104	0	60.5964	13.5336	41.7055	66.0251	0	22.2854	0
CL.10405	-2.37664	0.252386	0.643944	0	63.4819	15.2254	21.8457	1.40479	0	18.3527	0
CL.10406	-2.3262	NA	NA	0	141.391	8.45853	5.95792	30.9053	0	0	0
CL.10407	-5.37692	0.113621	NA	0	12.9849	0	11.9158	0	0	0	0
CL.10408	NA	NA	NA	0	0	0	0	0	0	0	0
CL.10409	NA	NA	NA	0	0	0	0	0	0	0	0
CL.1041	0.0593517	0.848891	0.972027	723.237	526.611	1069.16	670.266	684.834	670.106	922.877	840.522
CL.10410	-0.823922	0.517211	0.856514	13.2098	210.644	16.0712	64.5442	131.348	20.6641	19.6636	0
CL.10411	-0.157662	0.944824	0.991244	0	4.32831	18.6088	50.6424	66.0251	0	0	0
CL.10412	-1.74366	0.385141	0.772393	0	17.3132	1.69171	55.6073	3.51197	0	9.17634	9.71328
CL.10413	NA	NA	NA	0	0	0	0	0	0	0	0
CL.10414	-1.26894	0.54096	0.869608	0	14.4277	8.45853	30.7826	3.51197	0	9.17634	9.71328
CL.10415	NA	NA	NA	0	0	0	0	0	0	0	0
CL.10416	0.886519	0.721912	0.940354	0	49.0542	0	0	78.6682	0	0	11.6559
CL.10417	0.339509	0.844385	0.971442	0	54.8253	13.5336	58.5863	110.978	0	49.8144	0
CL.10418	0.793729	NA	NA	0	20.1988	0	0	30.9053	0	3.93272	0
CL.10419	-2.08131	0.467892	NA	4.95368	17.3132	0	10.9229	7.02394	0.738002	0	0
CL.1042	-1.26078	0.698412	0.934422	0	37.512	0	0	0	0	0	15.5412
CL.10420	NA	NA	NA	0	0	0	0	0	0	0	0
CL.10421	0.272285	0.900196	0.98133	4.95368	1.44277	18.6088	10.9229	34.4173	0	9.17634	0
CL.10422	NA	NA	NA	0	0	0	0	0	0	0	0
CL.10423	0.361616	0.901927	0.981817	0	0	0	31.7756	25.2862	0	15.7309	0
CL.10424	-0.679689	0.787794	NA	0	18.756	3.38341	5.95792	0.702394	0	11.7981	5.18042
CL.10425	NA	NA	NA	0	0	0	0	0	0	0	0
CL.10426	7.75501	0.000183848	0.00409336	0	0	0	0	63.9179	19.1881	106.183	0
CL.10427	-0.207666	0.89414	0.979971	54.4904	11.5422	3.38341	37.7335	70.9418	0	19.6636	1.94266
CL.10428	0.301392	0.864024	0.976067	4.95368	72.1385	0	12.9088	86.3945	0	20.9745	3.23776
CL.10429	-0.0827906	0.954266	0.99389	0	86.5662	27.0673	39.7195	48.4652	0	52.4362	44.0335
CL.1043	5.00769	NA	NA	0	0	0	0	28.0958	0	0	0
CL.10430	1.31006	0.693271	NA	0	0	5.07512	0	0	0	13.1091	0
CL.10431	0.311966	0.889757	0.979971	0	28.8554	0	33.7616	64.6203	0	13.1091	0
CL.10432	-0.663097	0.723314	0.940647	0	80.7951	30.4507	24.8247	84.2873	1.476	0	0
CL.10433	-0.735218	0.78192	0.956759	0	28.8554	0	36.7405	39.3341	0	0	0
CL.10434	-0.640686	NA	NA	0	46.1687	0	0	29.5006	0	0	0
CL.10435	-1.46809	0.439684	0.8096	26.4196	30.2982	0	61.5652	30.9053	0	0	11.6559
CL.10436	NA	NA	NA	0	0	0	0	0	0	0	0
CL.10437	1.37823	0.384096	0.771895	0	24.5271	15.2254	19.8597	74.4538	10.332	70.7889	0
CL.10438	-0.517095	0.749028	0.947365	0	69.253	3.38341	23.8317	20.3694	1.476	40.6381	5.18042
CL.10439	NA	NA	NA	0	0	0	0	0	0	0	0
CL.1044	0.0404755	0.82544	0.967229	7295.12	5782.62	5796.63	6827.78	6642.54	6918.03	6654.16	6217.15
CL.10440	0.641719	NA	NA	0	115.422	0	0	155.229	0	5.24362	19.4266
CL.10441	3.69997	NA	NA	0	5.77108	0	0	67.4298	0	5.24362	0.647552
CL.10442	-1.91623	0.395372	0.779395	0	43.2831	1.69171	27.8036	14.0479	0	5.24362	0
CL.10443	-3.18689	0.355871	NA	0	1.44277	0	3.97195	0	0	0	0
CL.10444	NA	NA	NA	0	0	0	0	0	0	0	0
CL.10445	-0.299797	0.887486	0.979774	0	77.9096	0	23.8317	59.0011	0	23.5963	0
CL.10446	NA	NA	NA	0	0	0	0	0	0	0	0
CL.10447	NA	NA	NA	0	0	0	0	0	0	0	0
CL.10448	-1.90505	0.565318	NA	0	0	0	15.8878	4.21437	0	0	0
CL.10449	-2.0314	NA	NA	0	2.88554	0	57.5933	14.7503	0	0	0
CL.1045	5.20894	NA	NA	0	0	0	0	32.3101	0	0	0
CL.10450	-3.46026	0.311359	NA	0	2.88554	0	7.9439	0.702394	0	0	0
CL.10451	-5.12729	0.131707	NA	0	0	0	20.8527	0	0	0	0
CL.10452	2.58602	NA	NA	13.2098	2.88554	0	0	87.0969	0	7.86543	0
CL.10453	1.57835	0.625271	0.908516	3.30245	53.3825	0	27.8036	252.16	0	0	0
CL.10454	0.151304	NA	NA	0	116.864	0	1.98597	7.72634	0	117.981	6.47552
CL.10455	-1.9825	0.319824	0.715853	0	23.0843	43.9843	41.7055	0	1.476	0	25.9021
CL.10456	-7.759	0.000903045	0.0152138	0	92.3373	35.5258	1.98597	0	0	0	0
CL.10457	-7.33927	0.000661087	0.0118973	42.9319	15.8705	13.5336	24.8247	0	0	0	0
CL.10458	-1.28024	0.620022	0.906497	0	38.9548	6.76682	10.9229	0	0	23.5963	0
CL.10459	NA	NA	NA	0	0	0	0	0	0	0	0
CL.1046	5.89108	NA	NA	0	0	0	0	50.5724	0	1.31091	0
CL.10460	-6.02182	0.0759422	NA	0	0	5.07512	33.7616	0	0	0	0
CL.10461	-0.44113	0.806671	0.963164	0	23.0843	20.3005	25.8177	22.4766	0	22.2854	6.47552
CL.10462	NA	NA	NA	0	0	0	0	0	0	0	0
CL.10463	-3.29962	0.319177	NA	0	0	10.1502	24.8247	3.51197	0	0	0
CL.10464	-6.19638	0.0602384	NA	0	1.44277	30.4507	11.9158	0	0	0	0
CL.10465	-1.68677	0.492269	0.8449	11.5586	2.88554	6.76682	28.7966	15.4527	0	0	0
CL.10466	-0.674048	0.836096	NA	11.5586	14.4277	0	0	16.1551	0	0	0
CL.10467	1.96683	0.560345	NA	0	2.88554	0	0	11.2383	0	0	0
CL.10468	NA	NA	NA	0	0	0	0	0	0	0	0
CL.10469	0.890214	NA	NA	0	20.1988	0	0	37.2269	0	0	0
CL.1047	0.286587	0.455664	0.821669	300.523	271.241	277.44	202.569	240.219	327.673	381.473	333.489
CL.10470	-1.09257	0.672753	0.926602	0	69.253	0	11.9158	37.9293	0	0	0
CL.10471	6.65693	NA	NA	0	0	0	0	84.9897	0	0	3.23776
CL.10472	0.414153	0.904192	NA	0	1.44277	0	0.992987	0	0	0	3.23776
CL.10473	NA	NA	NA	0	0	0	0	0	0	0	0
CL.10474	0.118876	NA	NA	19.8147	54.8253	13.5336	10.9229	95.5256	0	0	11.6559
CL.10475	-0.670342	0.750687	0.947643	6.6049	37.512	27.0673	0	23.8814	0	20.9745	0
CL.10476	0.86549	0.784843	0.957394	0	20.1988	0	0	0	6.64202	30.1508	0
CL.10477	NA	NA	NA	0	0	0	0	0	0	0	0
CL.10478	-0.744034	0.710672	0.937738	0	301.539	0	127.102	135.562	16.9741	91.7634	11.6559
CL.10479	-6.10503	NA	NA	0	1.44277	0	39.7195	0	0	0	0
CL.1048	6.00621	NA	NA	0	0	0	0	56.1915	0	0	0
CL.10480	-1.16954	NA	NA	0	47.6114	0	0	21.0718	0	0	0
CL.10481	-2.45415	0.373046	0.762109	0	63.4819	10.1502	0	13.3455	0	0	0
CL.10482	NA	NA	NA	0	0	0	0	0	0	0	0
CL.10483	1.28199	0.697348	NA	0	7.21385	0	0	5.61915	0	0	11.6559
CL.10484	-0.918818	0.714823	0.938642	0	209.202	10.1502	0	70.2394	0	34.0835	11.6559
CL.10485	2.19321	0.355572	0.746229	0	28.8554	0	0	63.2155	0	68.1671	0
CL.10486	0.279642	0.863516	0.97603	0	64.9247	1.69171	44.6844	55.4891	0	68.1671	11.6559
CL.10487	-0.00941048	0.997247	0.99948	0	10.0994	0	22.8387	11.9407	0	20.9745	0
CL.10488	-4.99307	0.142324	NA	0	0	5.07512	13.9018	0	0	0	0
CL.10489	NA	NA	NA	0	0	0	0	0	0	0	0
CL.1049	0.688591	0.000318378	0.00644174	2425.65	2493.11	2920.73	2434.8	3950.97	3932.08	4305.01	4374.86
CL.10490	0.824502	0.692286	0.933148	0	53.3825	16.9171	0	40.7389	0	83.8979	0
CL.10491	0.250434	0.882261	0.97909	19.8147	85.1234	0	53.6213	115.193	0	73.4107	0
CL.10492	-0.373442	0.863567	0.97603	0	47.6114	0	42.6985	61.8107	0	0	7.77062
CL.10493	-5.37783	0.11356	NA	0	0	0	24.8247	0	0	0	0
CL.10494	-0.452679	0.889452	NA	0	0	0	24.8247	0	0	1.31091	16.8363
CL.10495	0.821793	0.742102	0.945264	0	0	10.1502	21.8457	11.2383	0	45.8817	0
CL.10496	1.51057	0.596419	0.897233	0	14.4277	0	0	20.3694	2.21401	0	18.1315
CL.10497	-0.560418	NA	NA	0	51.9397	0	4.96494	35.8221	0	0	2.59021
CL.10498	-3.00052	0.203277	0.573169	0	40.3976	0	53.6213	2.80958	0	9.17634	0
CL.10499	-0.935628	0.694964	0.933784	0	28.8554	0	81.425	57.5963	0	0	0
CL.105	-0.0874592	0.874173	0.976687	155.215	164.476	126.878	146.962	75.8586	98.8923	230.719	154.117
CL.1050	0.464268	0.0683911	0.30305	6464.55	3138.03	3431.62	5110.91	6627.09	7314.34	5749.63	5337.77
CL.10500	-0.179555	NA	NA	0	56.268	0	0	0	0	49.8144	0
CL.10501	NA	NA	NA	0	0	0	0	0	0	0	0
CL.10502	0.319737	0.7889	0.958446	0	77.9096	32.1424	89.3689	139.074	4.42801	73.4107	32.3776
CL.10503	-0.648256	0.795908	0.960491	0	167.361	13.5336	58.5863	127.836	0	24.9072	0
CL.10504	1.49851	0.452665	0.81967	0	24.5271	0	14.8948	95.5256	0	6.55453	9.06573
CL.10505	0.585609	0.861593	NA	0	4.32831	0	0	0	0	6.55453	0
CL.10506	-6.07191	NA	NA	0	40.3976	0	0	0	0	0	0
CL.10507	-1.0247	0.753325	NA	0	23.0843	4.22926	0	13.3455	0	0	0
CL.10508	-0.364522	0.885342	0.979327	0	34.6265	0	38.7265	56.8939	0	0	0
CL.10509	1.43495	0.369394	0.758814	6.6049	57.7108	1.69171	39.7195	251.457	0	34.0835	0
CL.1051	0.449408	0.30895	0.705411	138.703	986.855	568.413	546.143	716.442	785.234	778.678	779.652
CL.10510	-0.922866	0.674528	0.92707	11.5586	54.8253	0	0	6.32155	0	18.3527	10.3608
CL.10511	NA	NA	NA	0	0	0	0	0	0	0	0
CL.10512	4.49437	NA	NA	0	0	0	0	19.667	0	0	0
CL.10513	-5.43285	0.109854	NA	0	25.9699	0	0	0	0	0	0
CL.10514	0.58667	0.800647	0.961882	0	77.9096	0	0	61.8107	0	55.058	0
CL.10515	3.90824	0.184091	0.544431	0	4.32831	0	0	29.5006	0	34.0835	0
CL.10516	-4.65256	0.171008	NA	3.30245	21.6416	0	0	0.702394	0	0	0
CL.10517	-4.44757	0.190952	NA	0	21.6416	0	0	0.702394	0	0	0
CL.10518	NA	NA	NA	0	0	0	0	0	0	0	0
CL.10519	NA	NA	NA	0	0	0	0	0	0	0	0
CL.1052	5.23992	NA	NA	0	0	0	0	33.0125	0	0	0
CL.10520	5.38081	NA	NA	0	1.44277	0	0	0	0	60.3016	0
CL.10521	5.8256	NA	NA	0	0	0	0	0	0	49.8144	0
CL.10522	5.49228	NA	NA	0	0	0	0	39.3341	0	0	0
CL.10523	-0.253398	0.86962	0.976272	75.9564	18.756	30.4507	0	90.6089	7.38002	1.31091	5.18042
CL.10524	-0.416921	0.845177	0.971442	0	92.3373	0	13.9018	0	0	64.2344	15.5412
CL.10525	-0.506365	0.552074	0.8753	194.845	461.687	74.435	206.541	408.793	8.85603	217.61	24.607
CL.10526	NA	NA	NA	0	0	0	0	0	0	0	0
CL.10527	-0.39796	0.356135	0.746454	246.033	499.199	257.985	374.356	155.932	309.961	326.415	253.84
CL.10528	0.0288203	0.909131	0.983084	1515.83	2791.76	1981.83	2073.36	1681.53	2096.66	2409.44	2345.43
CL.10529	6.00621	NA	NA	0	0	0	0	56.1915	0	0	0
CL.1053	5.43989	NA	NA	0	0	0	0	37.9293	0	0	0
CL.10530	-0.651694	0.14194	0.470856	2896.25	897.403	915.213	413.083	816.182	745.382	1001.53	695.471
CL.10531	0.248015	0.568178	0.883469	660.49	274.126	295.203	919.506	761.395	865.677	393.272	530.993
CL.10532	-0.292644	0.252174	0.643558	7111.83	3794.49	4202.2	3674.05	3425.58	3678.94	4801.85	3426.84
CL.10533	0.0592254	0.820095	0.966141	1363.91	1813.56	1501.39	1958.17	1280.46	1749.07	1573.09	2312.41
CL.10534	0.609188	0.111829	0.409438	211.357	359.25	363.717	222.429	488.866	386.713	550.58	340.612
CL.10535	0.180203	0.558042	0.879836	607.651	966.656	512.587	897.661	835.849	1001.47	710.511	832.104
CL.10536	0.154314	0.516687	0.856514	9454.92	5082.88	5517.5	7789.99	8708.99	8593.3	7220.47	6462.57
CL.10537	0.223197	0.289066	0.685031	2508.21	2461.37	3271.76	2893.56	2906.51	3341.67	2979.69	3772.64
CL.10538	4.96204	NA	NA	0	0	0	0	0	0	0	27.1972
CL.10539	0.068955	0.742438	0.945269	2291.9	3243.35	3354.65	2901.51	3098.26	3028.02	2907.59	3336.83
CL.1054	0.423197	0.121379	0.429684	838.823	832.478	673.299	591.82	842.873	1025.09	904.525	1161.06
CL.10540	6.27954	NA	NA	0	0	0	0	0	0	68.1671	0
CL.10541	4.83773	0.154022	NA	0	0	0	0	21.0718	0	3.93272	0
CL.10542	-0.00769729	0.978582	0.998116	673.7	685.316	517.662	727.86	604.761	587.45	765.569	633.306
CL.10543	0.048489	0.928135	0.987777	122.191	204.873	138.72	160.864	75.8586	215.497	214.988	142.461
CL.10544	5.54283	NA	NA	0	0	0	0	40.7389	0	0	0
CL.10545	-0.334425	0.290098	0.685913	610.954	1071.98	1210.42	1105.19	521.177	895.197	862.576	894.917
CL.10546	-0.480219	0.197257	0.563822	516.834	541.039	658.919	354.496	240.219	515.126	372.297	357.449
CL.10547	0.177604	0.876859	0.977323	52.8392	46.1687	63.439	0	57.5963	40.5901	55.058	30.4349
CL.10548	-6.0784	NA	NA	0	1.44277	38.9092	0	0	0	0	0
CL.10549	-1.00618	0.000654801	0.0118045	1071.65	859.891	874.612	714.951	541.546	399.259	437.842	373.637
CL.1055	NA	NA	NA	0	0	0	0	0	0	0	0
CL.10550	-0.192434	0.370761	0.759864	8119.08	9838.25	8509.28	6275.68	6463.43	6185.2	8974.46	7032.41
CL.10551	-2.8166	0.158659	0.500069	0	70.6957	18.6088	22.8387	0	1.476	0	14.2461
CL.10552	-1.29309	0.56276	0.881665	0	46.1687	45.6761	0	22.4766	0	0	14.8937
CL.10553	-0.558006	0.0325593	0.201255	6218.52	9910.39	7286.18	3921.31	4894.99	4540.93	5096.8	4034.9
CL.10554	5.76288	NA	NA	0	0	0	0	43.5484	0	3.93272	0
CL.10555	-0.128364	0.837991	0.970315	307.128	103.879	65.9765	129.088	115.193	209.593	152.065	76.4111
CL.10556	4.89486	0.149169	NA	0	0	0	0	0	0	26.2181	0
CL.10557	20.6983	NA	NA	0	0	0	0	59.0011	0	0	0
CL.10558	0.552538	0.0953206	0.369665	766.169	441.488	724.05	658.351	1172.3	672.32	1271.58	685.11
CL.10559	2.40634	0.13704	0.461153	42.9319	0	0	0	68.8346	79.7042	28.8399	46.6237
CL.1056	-6.36427	NA	NA	49.5368	0	0	0	0	0	0	0
CL.10560	-2.00326	0.540255	NA	33.0245	0	0	0	0	2.95201	0	5.18042
CL.10561	-5.82557	NA	NA	0	0	33.8341	0	0	0	0	0
CL.10562	5.92895	0.0801446	0.328847	0	0	0	0	35.1197	0	0	18.1315
CL.10563	2.47364	NA	NA	0	0	5.07512	12.9088	78.6682	6.64202	10.4872	5.82797
CL.10564	0.0498086	0.983162	0.998424	0	51.9397	0	5.95792	0	0	20.9745	38.8531
CL.10565	0.00236814	0.996255	0.999466	670.398	129.849	184.396	554.087	400.365	453.871	412.935	273.267
CL.10566	1.51817	0.48523	0.841111	0	0	3.38341	21.8457	0	5.90402	31.4617	35.6154
CL.10567	2.93858	0.0306152	0.193574	0	15.8705	16.9171	0	74.4538	11.808	89.1416	77.7062
CL.10568	-0.205589	0.607556	0.90196	572.975	323.181	416.16	326.693	284.47	479.701	433.91	223.405
CL.10569	0.585442	0.0708089	0.307813	3259.52	1745.75	1428.65	1187.61	1807.96	2823.6	3712.48	3086.88
CL.1057	0.0639854	0.974953	0.997595	0	60.5964	0	4.96494	42.1437	11.808	0	14.2461
CL.10570	0.979816	0.646032	0.916619	23.1172	37.512	0	0	0	35.4241	83.8979	0
CL.10571	0.309794	0.168925	0.518209	6959.92	4458.16	3990.73	5380.01	7173.55	6922.46	6200.58	5466.63
CL.10572	0.363419	0.0447767	0.241484	22613.5	19439.9	18180.8	16732.8	25177.3	22966.6	27539.5	23329.4
CL.10573	6.00365	NA	NA	0	0	0	0	54.7868	0	1.31091	0
CL.10574	0.706886	0.000909692	0.0152887	2353	1941.97	2510.49	2011.79	3201.51	3170.46	4226.36	3797.24
CL.10575	0.0676345	0.75242	0.947973	4081.83	4782.78	5114.03	3958.05	3488.09	4990.37	5404.86	4917.51
CL.10576	0.0446259	0.935926	0.990536	153.564	126.964	192.854	102.278	144.693	237.637	78.6543	132.101
CL.10577	0.0302344	0.920641	0.985827	525.09	1096.51	812.019	879.787	700.989	811.802	977.935	894.917
CL.10578	-0.493355	0.30225	0.698093	181.635	155.819	224.997	291.938	158.741	152.766	104.872	190.38
CL.10579	0.00962901	0.971829	0.996805	1207.05	1739.98	1827.04	2079.32	1726.49	1210.32	2280.98	1686.87
CL.1058	-0.49085	0.139379	0.465477	677.003	1252.32	1110.6	1064.48	594.226	678.962	516.497	1129.98
CL.10580	6.09905	0.0632217	0.291018	0	0	0	0	0	0	44.5708	15.5412
CL.10581	-0.279599	0.159847	0.501915	4956.98	4341.3	3495.06	3991.81	3245.06	3517.32	3405.73	3656.08
CL.10582	1.64993	0.561329	0.881079	0	8.65662	5.07512	0	0	11.808	31.4617	0
CL.10583	-0.218527	0.34869	0.742214	1733.79	1255.21	1520	1534.17	1226.38	1152.76	1430.2	1385.11
CL.10584	-0.756413	0.604709	0.900471	0	54.8253	26.2214	13.9018	16.1551	8.85603	18.3527	12.951
CL.10585	0.609225	0.121616	0.430156	184.937	421.289	395.859	658.351	736.812	515.864	587.286	696.118
CL.10586	0.137119	0.938388	0.990554	24.7684	8.65662	0.845853	20.8527	0	5.90402	47.1926	7.77062
CL.10587	-0.988922	0.638149	0.914681	0	40.3976	18.6088	11.9158	25.2862	10.332	0	0
CL.10588	-1.49925	0.574997	0.88605	39.6294	0	0	11.9158	0	0	7.86543	10.3608
CL.10589	-0.105831	0.625411	0.908516	2369.51	2754.25	3654.08	3122.95	2719.67	2588.91	2666.38	3087.53
CL.1059	0.108222	0.730058	0.941884	8589.68	2917.28	3934.91	7457.33	7403.24	7573.38	5123.02	4580.78
CL.10590	0.0864549	0.626481	0.909056	6555.37	7451.91	6690.7	6614.29	6424.8	7802.16	7341.07	7430.66
CL.10591	NA	NA	NA	0	0	0	0	0	0	0	0
CL.10592	-0.710837	0.501744	0.849736	89.1662	89.4518	21.9922	11.9158	32.3101	29.5201	62.9235	5.18042
CL.10593	-1.03402	0.674274	0.92707	33.0245	31.7409	0	0	21.0718	0	10.4872	0
CL.10594	0.399711	0.613751	0.905131	66.049	49.0542	33.8341	164.836	46.358	36.9001	167.796	163.831
CL.10595	0.360378	0.326201	0.722347	488.763	246.714	727.433	703.035	764.907	602.21	722.309	694.823
CL.10596	-5.62413	0.097717	NA	29.7221	0	0	0	0	0	0	0
CL.10597	5.38553	NA	NA	0	0	0	0	36.5245	0	0	0
CL.10598	5.505	NA	NA	0	0	0	1.98597	94.1208	0	0	0
CL.10599	-1.70689	0.106498	0.396043	95.7711	115.422	79.5102	71.4951	0	57.5642	34.0835	19.4266
CL.106	4.93385	NA	NA	0	0	0	0	26.691	0	0	0
CL.1060	-0.360869	0.299245	0.694301	584.534	484.771	614.089	617.638	331.53	364.573	409.002	686.405
CL.10600	-0.216021	0.42522	0.800517	7485.01	4549.05	3858.78	3013.72	4770.66	3865.66	4057.25	3579.02
CL.10601	-0.315995	0.335131	0.731016	947.804	1084.96	609.014	522.311	671.489	506.27	728.863	633.306
CL.10602	5.20894	NA	NA	0	0	0	0	32.3101	0	0	0
CL.10603	5.66285	0.0947564	NA	0	0	0	0	0	5.16602	39.3272	0
CL.10604	1.04603	0.719008	0.939441	0	0	0	23.8317	0	38.3761	0	11.0084
CL.10605	2.02558	0.00817744	0.0815396	16.5123	5.77108	80.356	75.467	169.979	250.183	149.443	161.888
CL.10606	-0.00595253	0.978216	0.998116	7077.15	5661.43	6582.43	7246.82	6813.22	4637.61	8104.02	6906.79
CL.10607	1.01767	0.0104554	0.0959869	439.226	418.403	382.325	176.752	840.766	901.101	381.473	740.152
CL.10608	0.360426	0.103429	0.389283	2925.97	2102.12	2205.14	3195.43	3582.21	3453.11	3355.92	2996.87
CL.10609	5.0135	0.139467	NA	0	0	0	0	0	2.21401	26.2181	0
CL.1061	5.77201	NA	NA	0	0	0	0	47.7628	0	0	0
CL.10610	6.10215	NA	NA	0	0	0	0	0	0	60.3016	0
CL.10611	-6.70632	NA	NA	62.7466	0	0	0	0	0	0	0
CL.10612	1.56873	0.364332	0.754358	0	1.44277	42.2926	0	68.8346	36.9001	5.24362	20.0741
CL.10613	0.296649	0.196484	0.562849	36199.8	24931.1	19605.2	21979.8	31514.3	35249.9	24199.3	35191.2
CL.10614	0.292909	0.197334	0.563966	3953.03	2871.11	2569.7	2767.46	3721.99	4064.18	2925.94	4179.3
CL.10615	-6.43513	NA	NA	0	51.9397	0	0	0	0	0	0
CL.10616	-6.36427	NA	NA	49.5368	0	0	0	0	0	0	0
CL.10617	5.14493	NA	NA	0	0	0	0	30.9053	0	0	0
CL.10618	20.7565	NA	NA	0	0	0	0	61.1083	0	0	0
CL.10619	0.10344	0.646935	0.916788	1259.89	1669.29	1461.63	1730.78	1603.57	1509.95	1712.04	1752.92
CL.1062	5.24187	0.122175	NA	0	0	0	0	0	4.42801	28.8399	0
CL.10620	-0.394569	0.82481	0.967198	0	66.3674	18.6088	1.98597	30.9053	0	20.9745	14.2461
CL.10621	5.38553	NA	NA	0	0	0	0	36.5245	0	0	0
CL.10622	5.44257	NA	NA	0	0	0	0	36.5245	1.476	0	0
CL.10623	-0.0150914	0.977751	0.998116	188.24	297.211	377.25	244.275	92.716	225.829	576.798	203.331
CL.10624	-5.82002	NA	NA	0	0	0	33.7616	0	0	0	0
CL.10625	-0.699929	0.742192	0.945264	56.1417	0	0	13.9018	12.6431	2.95201	0	27.1972
CL.10626	-0.213677	0.867988	0.976272	0	115.422	29.6048	19.8597	48.4652	25.8301	62.9235	5.18042
CL.10627	-6.56331	0.0474972	0.250822	33.0245	0	23.6839	0	0	0	0	0
CL.10628	1.25368	0.00183083	0.0269073	254.289	219.301	336.649	433.935	405.984	680.438	1234.87	652.085
CL.10629	0.396872	0.326057	0.722106	657.188	262.584	355.258	321.728	398.96	407.377	789.165	506.386
CL.1063	0.209986	0.424107	0.799708	5254.2	2810.52	2613.69	4272.82	4142.72	5263.43	3405.73	4476.53
CL.10630	0.2022	0.577953	0.887438	3574.9	970.984	1492.93	2652.27	3446.65	3039.09	1772.34	1737.38
CL.10631	NA	NA	NA	0	0	0	0	0	0	0	0
CL.10632	1.41001	0.666421	NA	0	0	0	10.9229	0	11.07	0	18.1315
CL.10633	-0.604105	0.000258827	0.00542651	14986.5	15316.4	15099.3	15793.5	10846.4	9432.41	9905.2	10075.3
CL.10634	NA	NA	NA	0	0	0	0	0	0	0	0
CL.10635	0.406564	0.236045	0.62298	776.076	568.452	698.674	1078.38	1685.75	789.662	934.675	728.496
CL.10636	0.876047	0.0559396	0.270923	450.785	187.56	179.321	188.668	312.565	676.748	304.13	548.476
CL.10637	0.431744	0.597376	0.897636	13.2098	129.849	106.577	73.4811	61.8107	31.7341	208.434	135.338
CL.10638	0.468263	0.643094	0.91605	69.3515	25.9699	11.8419	59.5792	67.4298	32.4721	123.225	7.77062
CL.10639	1.29033	6,87410407873011e-06	0.000220734	1647.92	721.385	1091.15	919.506	2584.81	2145.37	3397.87	2581.14
CL.1064	5.03327	0.137899	NA	0	0	0	0	0	0	28.8399	0
CL.10640	5.59167	NA	NA	0	0	0	0	42.1437	0	0	0
CL.10641	-0.16611	0.51258	0.854961	1174.02	1947.74	2035.12	1600.7	1511.55	1352.02	1743.5	1419.43
CL.10642	0.587071	0.00726773	0.0750171	1571.97	1584.16	1953.92	1980.02	3048.39	2428.03	2836.8	2342.84
CL.10643	5.03327	0.137899	NA	0	0	0	0	0	0	28.8399	0
CL.10644	2.7358	0.163075	0.507767	0	0	1.69171	14.8948	19.667	45.7561	0	46.6237
CL.10645	-0.393585	0.893673	0.979971	0	0	33.8341	6.95091	0	0	0	31.0825
CL.10646	-0.460951	0.823165	0.966969	0	28.8554	0	37.7335	10.5359	11.808	0	25.9021
CL.10647	-0.564966	0.0367367	0.215721	994.038	1240.78	1536.07	1429.9	868.159	708.482	1109.03	834.047
CL.10648	2.67635	NA	NA	0	11.5422	0	0	0	0	73.4107	0
CL.10649	0.39709	0.526886	0.86093	112.283	66.3674	94.7355	139.018	96.9304	104.058	77.3434	264.201
CL.1065	0.762144	0.00668717	0.0708133	4141.27	2832.16	2674.59	5339.29	6361.58	8929.83	4210.63	5914.09
CL.10650	6.4958	0.0301969	0.192271	0	0	0	0	44.9532	0	34.0835	0
CL.10651	0.945713	0.434116	0.806035	89.1662	0	21.9922	5.95792	74.4538	39.1141	51.1253	59.5748
CL.10652	0.0309714	0.955136	0.99389	782.681	131.292	213.155	165.829	241.624	425.089	388.028	264.201
CL.10653	-0.0486707	0.871375	0.976432	7731.04	5470.99	5193.54	2643.33	3625.06	4184.47	6751.16	5778.75
CL.10654	5.21291	NA	NA	0	0	0	0	0	0	0	32.3776
CL.10655	5.63891	NA	NA	0	0	0	0	43.5484	0	0	0
CL.10656	5.8256	NA	NA	0	0	0	0	0	0	49.8144	0
CL.10657	0.614	0.0343006	0.206895	601.046	418.403	546.421	449.823	674.298	874.533	752.46	782.89
CL.10658	5.43989	NA	NA	0	0	0	0	37.9293	0	0	0
CL.10659	5.20894	NA	NA	0	0	0	0	32.3101	0	0	0
CL.1066	0.52379	0.609431	0.902861	52.8392	31.7409	18.6088	33.7616	7.02394	28.0441	44.5708	116.559
CL.10660	0.0913399	0.78712	0.957932	449.133	893.075	1089.46	735.804	1123.83	728.408	629.235	894.269
CL.10661	0.584879	0.00899398	0.0870574	1074.95	1079.19	1078.46	1345.5	1596.54	1737.26	1802.49	1732.85
CL.10662	-0.073793	0.791781	0.959289	4182.55	1905.9	2377.69	3239.12	3117.93	3505.51	2219.36	2275.5
CL.10663	-0.108085	0.700512	0.935011	1137.69	946.457	982.035	777.509	936.292	652.394	1116.89	861.244
CL.10664	0.147601	0.715459	0.938759	394.643	187.56	228.38	271.086	309.053	256.087	327.726	304.349
CL.10665	-0.073383	0.704666	0.935962	3328.87	3772.84	3270.07	4117.92	3624.35	3163.82	3456.86	3526.57
CL.10666	5.8256	NA	NA	0	0	0	0	0	0	49.8144	0
CL.10667	-6.35254	NA	NA	0	49.0542	0	0	0	0	0	0
CL.10668	0.138631	0.948263	0.992358	0	0	28.759	17.8738	32.3101	8.85603	0	10.3608
CL.10669	-3.46877	3,24492930775757e-10	2,55186138768558e-08	6654.44	7897.72	10848.9	4958.98	293.601	277.489	954.339	1217.4
CL.1067	1.53285	0.269558	0.665097	0	25.9699	0	55.6073	36.5245	82.6563	91.7634	25.9021
CL.10670	-3.17563	3,58052280938387e-16	6,27042818046721e-14	4666.36	3277.97	4038.1	1997.89	200.885	173.431	553.202	621.002
CL.10671	5.89386	NA	NA	0	0	0	0	51.9772	0	0	0
CL.10672	0.876356	1,21279810122149e-05	0.0003663	11304.3	9776.21	7872.35	8814.75	14869.7	21029.4	17209.6	16214.7
CL.10673	5.68466	NA	NA	0	0	0	0	44.9532	0	0	0
CL.10674	5.43989	NA	NA	0	0	0	0	37.9293	0	0	0
CL.10675	6.86685	0.013639	0.11525	0	0	0	0	21.0718	0	81.2761	0
CL.10676	5.43989	NA	NA	0	0	0	0	37.9293	0	0	0
CL.10677	-0.161066	0.775566	0.955086	145.308	86.5662	115.036	152.92	148.908	128.412	89.1416	80.2964
CL.10678	2.49976	NA	NA	0	17.3132	0	0	4.91676	5.90402	86.5197	0
CL.10679	-0.781485	0.594071	0.89653	21.4659	57.7108	10.1502	23.8317	0	5.90402	18.3527	41.4433
CL.1068	1.30606	0.334386	0.73025	118.888	0	16.9171	0	68.8346	25.0921	183.527	56.9846
CL.10680	6.03783	NA	NA	0	0	0	0	0	0	57.6798	0
CL.10681	-2.5913	0.0160771	0.128684	5280.62	1171.53	1214.64	218.457	415.817	82.6563	734.107	76.4111
CL.10682	6.39093	0.0384194	0.221606	0	0	0	0	66.7275	6.64202	0	0
CL.10683	-0.177386	0.430869	0.803446	1730.48	1815.01	1382.12	1576.86	1467.3	1524.71	1258.47	1497.79
CL.10684	4.85602	NA	NA	0	0	0	0	25.2862	0	0	0
CL.10685	20.6983	NA	NA	0	0	0	0	59.0011	0	0	0
CL.10686	5.81378	NA	NA	0	0	0	0	49.1676	0	0	0
CL.10687	-0.401989	0.858344	0.975087	0	23.0843	30.4507	21.8457	0	0	0	56.9846
CL.10688	-0.142573	0.572855	0.885568	1050.18	1451.43	1378.74	1118.1	1201.09	898.149	1247.98	1182.43
CL.10689	-0.033639	0.912006	0.983134	1436.57	897.403	1336.45	961.212	713.633	1025.82	1289.93	1495.84
CL.1069	-0.0484992	0.855827	0.974639	1367.21	2504.65	2382.77	1557	1947.04	1578.59	1774.97	2253.48
CL.10690	5.54283	NA	NA	0	0	0	0	40.7389	0	0	0
CL.10691	5.93229	NA	NA	0	0	0	0	53.382	0	0	0
CL.10692	0.582112	0.00318942	0.0408529	7123.39	6896.44	7599.14	7848.57	10117.3	8972.63	13845.8	11184.5
CL.10693	-1.27298	2,87664181159539e-05	0.000803609	9572.16	4588.01	3553.43	5127.79	2749.87	3022.86	1654.36	2021.01
CL.10694	-0.921495	0.0068773	0.0723854	6875.7	3526.13	2367.54	1770.5	1810.77	2103.31	2064.68	1695.29
CL.10695	20.6983	NA	NA	0	0	0	0	59.0011	0	0	0
CL.10696	-0.170637	0.582041	0.889342	785.983	1157.1	1089.46	1761.56	942.613	1415.49	818.005	1084
CL.10697	5.74443	0.0900651	NA	0	0	0	0	35.1197	0	11.7981	0
CL.10698	-0.371598	0.60886	0.902578	33.0245	103.879	60.9014	123.13	68.1322	69.3722	52.4362	58.2797
CL.10699	-0.352858	0.118364	0.423114	2442.16	3806.03	4133.68	3326.51	2851.72	2727.66	2379.29	2776.7
CL.107	0.0852833	0.714488	0.938585	1512.52	1452.87	1881.18	1804.26	1566.34	1504.79	2072.54	1916.75
CL.1070	0.629621	0.26977	0.665124	39.6294	311.638	316.349	152.92	266.207	267.157	272.668	464.942
CL.10700	5.14493	NA	NA	0	0	0	0	30.9053	0	0	0
CL.10701	0.106732	0.560741	0.880687	4876.07	4277.81	4540.54	5172.47	4960.31	5363.8	5323.59	4669.5
CL.10702	-0.281454	0.267356	0.662731	1055.13	920.487	1075.92	1131.01	723.466	887.079	823.249	1007.59
CL.10703	0.246623	0.364689	0.754511	2648.57	1183.07	1919.24	2328.56	2610.1	2737.99	2008.31	2227.58
CL.10704	0.669902	0.0612393	0.286471	287.313	559.795	878.841	605.722	1157.55	714.386	820.627	1021.84
CL.10705	-0.220432	0.946178	NA	16.5123	0	1.69171	0	15.4527	0	0	0
CL.10706	5.32903	NA	NA	0	0	0	0	35.1197	0	0	0
CL.10707	2.21387	0.0986608	0.378166	0	17.3132	13.5336	6.95091	92.716	6.64202	20.9745	55.6895
CL.10708	0.0246838	0.903387	0.98196	2377.76	2014.11	2263.5	2618.51	2209.73	2450.17	2363.56	2411.48
CL.10709	0.127817	0.957791	0.994042	0	8.65662	0	39.7195	0	19.1881	0	33.6727
CL.1071	-1.42013	NA	NA	0	0	0	41.7055	0	0	0	15.5412
CL.10710	2.09612	0.339943	0.734669	0	7.21385	0	9.92987	42.1437	0	23.5963	7.77062
CL.10711	6.42804	0.0347768	0.208921	0	0	0	0	49.1676	0	26.2181	0
CL.10712	5.15956	0.128203	NA	0	0	0	0	0	0	31.4617	0
CL.10713	-2.9122	NA	NA	77.6076	0	0	0	0	0	10.4872	0
CL.10714	-1.02273	0.601661	0.8998	0	5.77108	54.1346	37.7335	0	22.1401	0	25.9021
CL.10715	0.0385163	0.90981	0.983134	406.202	522.283	693.599	643.456	450.937	460.513	613.504	804.259
CL.10716	-1.27321	0.2596	0.653923	333.548	37.512	60.9014	21.8457	51.9772	64.9442	70.7889	0
CL.10717	0.0219511	0.991727	0.999076	99.0735	0	0	0	32.3101	0	62.9235	5.18042
CL.10718	-0.0608258	0.877035	0.977323	591.139	528.054	323.962	282.008	559.106	453.133	301.508	336.727
CL.10719	3.36677	0.317148	NA	0	0	2.53756	0	0	0	28.8399	0
CL.1072	-0.0898732	0.857105	0.974893	217.962	115.422	213.155	225.408	205.099	133.578	123.225	262.906
CL.10720	-0.343471	0.355319	0.74621	1562.06	692.53	497.361	768.572	650.417	881.175	511.253	727.848
CL.10721	-0.38587	0.466435	0.828475	515.182	144.277	231.764	139.018	132.05	221.401	196.636	237.004
CL.10722	5.20894	NA	NA	0	0	0	0	32.3101	0	0	0
CL.10723	-6.17164	NA	NA	0	43.2831	0	0	0	0	0	0
CL.10724	-5.91508	0.0813529	NA	36.327	0	0	0	0	0	0	0
CL.10725	4.89486	0.149169	NA	0	0	0	0	0	0	26.2181	0
CL.10726	1.04153	0.345186	0.739578	99.0735	37.512	23.6839	0	105.359	119.556	78.6543	24.607
CL.10727	2.28423	NA	NA	0	0	7.61268	0	35.1197	0	2.62181	0
CL.10728	-0.16045	0.768103	0.952927	211.357	173.132	79.5102	184.696	89.9065	187.453	167.796	134.691
CL.10729	-0.573812	NA	NA	0	0	0	39.7195	26.691	0	0	0
CL.1073	5.21291	NA	NA	0	0	0	0	0	0	0	32.3776
CL.10730	-0.436516	0.697558	0.93401	0	34.6265	94.7355	105.257	32.3101	30.9961	83.8979	27.1972
CL.10731	3.02773	NA	NA	0	5.77108	0	0	46.358	0	0	0
CL.10732	5.57669	NA	NA	0	0	0	0	0	0	41.949	0
CL.10733	-0.0639834	0.835649	0.969784	16451.2	5511.38	5630	6514	7812.03	8089.98	8156.45	8563.23
CL.10734	0.73537	0.782056	0.956759	0	8.65662	18.6088	0	0	0	39.3272	6.47552
CL.10735	20.8378	NA	NA	0	0	0	0	64.6203	0	0	0
CL.10736	-3.11604	0.000873785	0.0148772	151.913	227.958	91.3521	92.3478	7.02394	33.9481	0	23.3119
CL.10737	-6.07191	NA	NA	0	40.3976	0	0	0	0	0	0
CL.10738	0.43611	0.302693	0.698473	901.569	992.626	808.635	210.513	866.755	578.594	1344.99	1150.05
CL.10739	0.0516179	0.856969	0.974893	969.269	1129.69	1236.64	1182.65	814.777	1066.41	1090.67	1711.48
CL.1074	-6.04115	0.0749949	NA	39.6294	0	0	0	0	0	0	0
CL.10740	5.41296	NA	NA	0	0	0	0	37.2269	0	0	0
CL.10741	5.14493	NA	NA	0	0	0	0	30.9053	0	0	0
CL.10742	5.19184	0.125812	NA	0	0	0	0	0.702394	0	31.4617	0
CL.10743	5.81378	NA	NA	0	0	0	0	49.1676	0	0	0
CL.10744	2.78333	NA	NA	0	0	1.69171	11.9158	0	7.38002	87.8307	0
CL.10745	-6.78051	NA	NA	66.049	0	0	0	0	0	0	0
CL.10746	-7.2141	NA	NA	89.1662	0	0	0	0	0	0	0
CL.10747	-2.24664	NA	NA	0	40.3976	0	0	0	0	0	8.41817
CL.10748	0.147544	0.697403	0.93401	229.52	517.955	473.678	540.185	481.842	338.743	574.177	558.837
CL.10749	0.625124	0.0021393	0.030308	3112.56	4335.52	4043.18	3568.8	5095.87	5703.28	6808.84	5624.64
CL.1075	-0.141162	0.434009	0.806035	4674.62	5150.69	5097.96	5272.76	4630.89	4383	4289.28	5010.11
CL.10750	0.241313	0.454556	0.821118	1165.77	816.608	823.015	637.498	758.586	729.146	1465.59	1116.38
CL.10751	0.385398	0.130255	0.448161	4743.97	2752.81	2479.19	2607.58	3738.84	3796.28	5069.27	3828.33
CL.10752	0.200265	0.473273	0.832538	1474.54	908.945	1107.22	833.116	1142.09	1019.92	1286	1517.21
CL.10753	0.118882	0.833289	0.969447	165.123	152.934	268.981	127.102	63.2155	196.309	204.501	312.12
CL.10754	6.11347	0.0613767	0.286985	0	0	0	0	25.2862	0	35.3944	0
CL.10755	1.71644	0.25793	0.651845	0	49.0542	8.45853	0	23.8814	16.236	31.4617	116.559
CL.10756	-0.252036	0.384632	0.772393	2777.36	2475.79	2818.38	2559.92	1434.29	1949.8	1795.94	3745.44
CL.10757	-0.123276	0.547654	0.873425	9887.54	7656.78	6233.94	8573.45	7734.06	8030.2	6412.95	7519.37
CL.10758	NA	NA	NA	0	0	0	0	0	0	0	0
CL.10759	5.95694	0.0778485	0.324647	0	0	0	0	35.1197	19.1881	0	0
CL.1076	0.17364	0.57388	0.88596	3309.06	1243.67	1347.44	2365.3	2354.43	2767.51	2104	2092.89
CL.10760	-0.47363	0.0180705	0.138835	10042.8	15700.2	13061.7	14112.3	9811.75	10269.3	8201.02	9825.3
CL.10761	-0.670359	0.00358075	0.0446576	4123.11	4067.17	3660.85	4011.67	3033.64	3011.05	1864.11	2055.33
CL.10762	5.89108	NA	NA	0	0	0	0	50.5724	0	1.31091	0
CL.10763	0.488731	0.155127	0.494394	2126.78	626.162	908.446	1447.78	1803.75	2160.87	1861.49	1340.43
CL.10764	0.27822	0.827414	0.967264	95.7711	11.5422	11.8419	35.7475	0	53.1362	94.3852	40.1482
CL.10765	0.0365909	0.833578	0.96946	11956.5	12840.7	11348.8	10614	10991.8	11813.2	13151	12005
CL.10766	-0.366463	0.0643508	0.293772	38424	25023.4	27456.4	28480.9	20677.8	25373.3	21408.4	25141.2
CL.10767	0.292676	0.247113	0.637356	1604.99	908.945	1128.37	1311.74	1432.88	1534.31	1507.54	1591.68
CL.10768	-0.584111	0.0573816	0.275791	868.545	1500.48	1455.71	1439.83	882.207	900.363	550.58	1177.25
CL.10769	5.4189	0.109968	NA	0	0	0	0	0	2.21401	35.3944	0
CL.1077	-0.431546	0.0355144	0.211549	3629.39	3752.65	4053.33	3506.24	3052.61	2819.91	2176.1	3027.31
CL.10770	5.93229	NA	NA	0	0	0	0	53.382	0	0	0
CL.10771	4.73078	NA	NA	0	0	0	0	23.179	0	0	0
CL.10772	-0.45599	0.067115	0.300339	16127.5	9115.42	8033.91	11640.8	9165.54	9619.12	7814.31	6143.32
CL.10773	NA	NA	NA	0	0	0	0	0	0	0	0
CL.10774	0.0583151	0.83951	0.970599	10275.6	4015.23	4399.28	5414.76	7186.9	6596.26	6658.09	4653.96
CL.10775	0.227018	0.435556	0.806914	1471.24	1542.32	1591.9	1968.1	2606.59	2038.36	1009.4	2037.2
CL.10776	1.05279	0.0578776	0.277216	66.049	46.1687	159.02	123.13	202.29	216.973	195.325	207.217
CL.10777	-0.121499	0.927757	0.987777	0	17.3132	81.2019	31.7756	15.4527	60.5162	5.24362	38.8531
CL.10778	0.279083	0.134115	0.45526	9375.66	9018.76	8173.48	8624.09	13051.2	10092.9	9787.22	9767.67
CL.10779	1.08699	0.0710266	0.30831	201.45	41.8403	223.305	91.3548	218.445	163.836	563.689	241.537
CL.1078	-4.04267	0.231465	NA	0	8.65662	18.6088	0	0	1.476	0	0
CL.10780	1.01042	0.700575	0.935011	0	20.1988	5.07512	0	0	0	41.949	9.06573
CL.10781	0.900354	0.0329443	0.202644	201.45	126.964	356.95	221.436	396.15	398.521	547.958	354.858
CL.10782	0.106609	0.856053	0.974639	145.308	271.241	59.2097	101.285	158.741	147.6	120.603	192.323
CL.10783	3.25617	0.267278	0.662731	6.6049	0	0	0	44.9532	0	0	16.1888
CL.10784	4.08615	NA	NA	3.30245	0	0	0	49.1676	0	0	0
CL.10785	5.9539	0.0788747	0.326398	0	0	0	0	46.358	0	7.86543	0
CL.10786	0.153316	0.625557	0.908587	422.714	979.641	925.363	846.025	843.576	830.991	912.39	945.426
CL.10787	1.30236	0.489513	0.842422	0	2.88554	21.9922	5.95792	26.691	11.808	0	38.2056
CL.10788	0.218179	0.405774	0.785891	8023.31	3967.62	3873.16	6077.08	7294.36	7405.11	5566.1	5252.94
CL.10789	5.77201	NA	NA	0	0	0	0	47.7628	0	0	0
CL.1079	0.175102	0.960481	NA	0	0	0	0	0.702394	0	0	0
CL.10790	-3.00273	6,73187200287759e-08	3,55170158329035e-06	3753.24	7825.59	12672.6	6059.21	613.893	339.481	1342.37	1486.78
CL.10791	-0.809769	0.00188687	0.027479	2620.5	3465.53	3709.06	2626.45	1240.43	1477.48	2092.2	2278.09
CL.10792	0.353084	0.167743	0.516361	1448.12	1344.66	1132.6	1391.18	1881.71	1594.82	2122.36	1192.79
CL.10793	NA	NA	NA	0	0	0	0	0	0	0	0
CL.10794	0.733486	0.027371	0.180265	1046.88	406.861	543.883	1040.65	1171.59	1336.52	1297.8	1244.59
CL.10795	-0.334636	0.510487	0.854467	234.474	402.533	639.465	168.808	168.575	219.187	262.181	496.672
CL.10796	0.861658	0.118555	0.423279	52.8392	83.6807	167.479	164.836	194.563	282.655	226.787	151.527
CL.10797	NA	NA	NA	0	0	0	0	0	0	0	0
CL.10798	0.435003	0.265997	0.661594	186.589	418.403	499.053	297.896	447.425	541.694	388.028	519.984
CL.10799	-0.753231	0.342532	0.737255	56.1417	89.4518	96.4272	46.6704	32.3101	50.1842	20.9745	67.3454
CL.108	0.49005	0.0653844	0.296091	1317.68	831.036	1359.29	1072.43	2035.54	1472.31	1326.64	1598.16
CL.1080	-0.708691	0.738596	0.944633	0	20.1988	18.6088	25.8177	0	16.236	23.5963	0
CL.10800	NA	NA	NA	0	0	0	0	0	0	0	0
CL.10801	-0.376005	0.10625	0.395684	8873.69	8607.57	10033.5	7381.87	4569.07	5948.3	8805.35	7571.18
CL.10802	-1.32024	0.534552	0.865076	33.0245	1.44277	15.2254	6.95091	0	0	14.42	8.41817
CL.10803	5.38314	NA	NA	0	0	0	0	0	0	36.7053	0
CL.10804	4.85602	NA	NA	0	0	0	0	25.2862	0	0	0
CL.10805	20.321	NA	NA	0	0	0	0	67.4298	0	0	0
CL.10806	-7.21175	0.0115382	0.102357	0	63.4819	25.3756	0	0	0	0	0
CL.10807	-0.24611	0.850616	0.972654	19.8147	0	72.7433	37.7335	28.0958	13.284	55.058	14.2461
CL.10808	0.935693	0.644219	0.91605	0	31.7409	10.1502	6.95091	0	17.7121	76.0325	0
CL.10809	5.27568	0.119766	NA	0	0	0	0	0	0	34.0835	0
CL.1081	NA	NA	NA	0	0	0	0	0	0	0	0
CL.10810	6.84728	0.00499912	0.0567129	0	0	0	0	42.1437	0	28.8399	29.7874
CL.10811	-1.56579	0.315287	0.711189	62.7466	46.1687	0	53.6213	0	23.6161	18.3527	12.951
CL.10812	5.62258	0.0915801	NA	0	0	0	0	35.1197	6.64202	0	1.2951
CL.10813	5.19638	0.125478	NA	0	0	0	0	0	23.6161	0	8.41817
CL.10814	0.530693	0.24584	0.635568	135.401	473.229	257.139	186.682	278.148	361.621	422.112	458.467
CL.10815	0.563667	0.0355272	0.211549	809.101	1077.75	1676.48	1344.5	1798.83	1918.07	1848.38	1695.94
CL.10816	0.461006	0.354564	0.745746	145.308	236.614	227.534	75.467	205.099	214.021	262.181	261.611
CL.10817	0.137471	0.48697	0.842075	3314.01	3112.06	2559.55	2822.07	3498.63	3202.93	3279.89	3003.35
CL.10818	-3.21844	NA	NA	46.2343	0	0	0	0	2.95201	0	1.94266
CL.10819	0.0767412	0.768349	0.952948	4682.88	2614.3	2606.07	3348.35	4151.15	4136.5	3079.32	2604.45
CL.1082	NA	NA	NA	0	0	0	0	0	0	0	0
CL.10820	-1.55592	NA	NA	0	66.3674	0	0	22.4766	0	0	0
CL.10821	5.89987	NA	NA	0	0	0	0	0	0	52.4362	0
CL.10822	5.14493	NA	NA	0	0	0	0	30.9053	0	0	0
CL.10823	2.1052	NA	NA	18.1635	0	0	0	77.2634	0	0	0
CL.10824	0.771225	0.000371231	0.00732608	8682.14	10204.7	9725.62	8567.49	16153	17447.8	19280.8	10577.8
CL.10825	21.0778	NA	NA	0	0	0	0	80.0729	0	0	0
CL.10826	6.00277	0.0748619	0.318457	0	0	0	0	0	0	47.1926	9.06573
CL.10827	4.96204	NA	NA	0	0	0	0	0	0	0	27.1972
CL.10828	5.52989	0.102823	NA	0	0	0	0	0	0	36.7053	3.88531
CL.10829	-6.15709	0.0695146	NA	42.9319	0	0	0	0	0	0	0
CL.1083	4.45156	0.0758774	0.320813	3.30245	0	0	0.992987	77.2634	0	13.1091	0
CL.10830	-0.378637	0.146333	0.478666	1707.37	1281.18	1185.89	1392.17	785.277	1157.93	1227.01	1111.2
CL.10831	-5.96477	0.0787961	NA	0	37.512	0	0	0	0	0	0
CL.10832	-6.17164	NA	NA	0	43.2831	0	0	0	0	0	0
CL.10833	0.0626569	0.759687	0.950893	3021.74	2614.3	2425.91	2679.08	2631.17	2629.5	2650.65	3303.16
CL.10834	1.19021	0.0822353	0.332905	16.5123	222.187	96.4272	182.71	438.294	451.657	188.77	103.608
CL.10835	-0.517174	0.0592883	0.281258	2666.73	2174.25	2891.12	3257	2815.9	1987.44	1276.82	1596.86
CL.10836	0.076061	0.712831	0.938368	7717.83	5566.21	6741.45	8538.7	7144.05	8256.03	8287.54	6425.66
CL.10837	-0.331209	0.616231	0.90557	208.054	96.6656	147.178	165.829	271.827	106.272	39.3272	72.5258
CL.10838	-0.859989	0.759563	0.950882	0	20.1988	8.45853	8.93689	0	20.6641	0	0
CL.10839	6.89237	0.00106848	0.017369	0	0	0	0	27.3934	8.85603	34.0835	33.6727
CL.1084	1.65064	0.248938	0.639367	39.6294	36.0693	0	0	81.4777	23.6161	110.116	20.7217
CL.10840	0.451703	0.57633	0.88653	29.7221	40.3976	79.5102	38.7265	57.5963	32.4721	102.251	66.6978
CL.10841	-0.23787	0.497053	0.847281	396.294	706.957	871.228	744.74	678.513	486.343	734.107	410.548
CL.10842	-0.143958	0.575259	0.886191	1510.87	2480.12	2739.72	2433.81	1884.52	2170.46	1671.4	2568.84
CL.10843	0.473394	0.0540016	0.266918	1086.51	1177.3	1289.08	1259.11	1694.88	2131.35	1296.49	1558.01
CL.10844	1.24534	1,34180159449018e-05	0.000402927	13791	6671.37	20420.6	10697.5	27960.9	23517.9	36722.4	34091.7
CL.10845	6.26734	0.0280986	0.183854	0	0	0	0	49.1676	0	2.62181	15.5412
CL.10846	-5.84903	0.084856	NA	0	34.6265	0	0	0	0	0	0
CL.10847	5.38314	NA	NA	0	0	0	0	0	0	36.7053	0
CL.10848	4.85602	NA	NA	0	0	0	0	25.2862	0	0	0
CL.10849	0.168766	0.569294	0.883833	5970.83	2324.3	2684.74	5279.71	4993.32	5204.39	4447.9	3629.53
CL.1085	-0.245158	0.203543	0.573532	16665.8	16088.3	21723.2	19077.3	13818.2	13945.3	15979.9	18319.9
CL.10850	-1.12255	0.626438	0.909056	0	11.5422	35.5258	11.9158	0	0	26.2181	1.2951
CL.10851	0.404722	0.244846	0.634098	1182.28	352.036	715.591	855.955	933.482	1120.29	921.566	1134.51
CL.10852	-0.651899	0.13148	0.450665	165.123	453.03	471.986	579.905	252.862	237.637	291.021	282.98
CL.10853	5.21522	NA	NA	0	0	0	0	29.5006	2.95201	0	0
CL.10854	-0.441668	0.388914	0.776101	102.376	194.774	258.831	276.05	212.123	127.674	117.981	155.412
CL.10855	-3.0423	NA	NA	0	41.8403	0	0	0	0	5.24362	0
CL.10856	-0.313435	0.293051	0.688598	4171	5180.99	3862.16	5168.5	5031.95	4487.05	1617.66	3652.19
CL.10857	0.255526	0.255861	0.649186	3239.7	5263.23	5932.81	4402.91	5180.86	5399.96	5749.63	6163.4
CL.10858	-0.315739	0.907786	0.982665	0	14.4277	0	23.8317	28.0958	0	2.62181	0
CL.10859	5.26936	NA	NA	0	0	0	0	0	0	0	33.6727
CL.1086	-0.027814	0.933896	0.989872	439.226	578.551	466.065	580.898	323.804	519.554	588.596	594.453
CL.10860	0.0890243	0.703584	0.935658	2229.15	2669.13	3816.49	3046.49	2643.81	2929.87	3641.69	3301.22
CL.10861	1.13184	0.0967058	0.373075	102.376	31.7409	84.5853	69.5091	189.646	52.3982	272.668	117.854
CL.10862	0.0922187	0.664076	0.922876	12268.6	12886.8	11703.2	7838.64	13664.4	10540.1	12642.4	10798.6
CL.10863	-0.0252416	0.931937	0.989079	662.141	1193.17	1473.48	1243.22	1033.22	968.997	1147.04	1346.91
CL.10864	5.15417	NA	NA	0	0	0	0	0	0	0	31.0825
CL.10865	5.20894	NA	NA	0	0	0	0	32.3101	0	0	0
CL.10866	5.27024	NA	NA	0	0	0	0	33.7149	0	0	0
CL.10867	-5.84903	0.084856	NA	0	34.6265	0	0	0	0	0	0
CL.10868	5.48316	NA	NA	0	0	0	0	0	0	39.3272	0
CL.10869	0.0370319	0.865607	0.976272	2341.44	3331.36	3414.71	3172.59	2721.78	2877.47	3404.42	3579.02
CL.1087	0.25079	0.314414	0.710009	1017.16	1324.46	1084.38	1332.59	1250.96	1427.3	1761.86	1225.17
CL.10870	-1.23864	7,92908286374459e-09	4,93259960837126e-07	8622.7	10985.3	11666.8	13081.6	3840.69	4878.19	4260.44	5817.61
CL.10871	0.213222	0.315953	0.711911	4567.29	3895.48	3924.76	3024.64	4554.32	3647.21	4860.84	4802.24
CL.10872	5.21291	NA	NA	0	0	0	0	0	0	0	32.3776
CL.10873	0.900634	0.00116172	0.018467	68469.7	37162.9	34625	21664	69393.7	75345.6	79312.4	78226.9
CL.10874	6.53206	0.0130425	0.111808	0	0	0	0	57.5963	10.332	0	12.951
CL.10875	NA	NA	NA	0	0	0	0	0	0	0	0
CL.10876	5.66197	NA	NA	0	0	0	0	44.2508	0	0	0
CL.10877	0.958004	0.0466352	0.248292	85.8637	164.476	142.103	337.616	405.984	280.441	388.028	347.088
CL.10878	0.928408	0.525238	0.859914	0	34.6265	45.6761	13.9018	106.764	44.2801	0	28.4923
CL.10879	3.93686	0.24729	NA	0	0	0	0	13.3455	0	0	0
CL.1088	-0.064116	0.751487	0.947643	3744.98	3866.62	4377.29	4333.4	3226.8	4109.2	3662.67	4615.1
CL.10880	-7.15961	NA	NA	85.8637	0	0	0	0	0	0	0
CL.10881	1.07879	NA	NA	0	0	0	13.9018	29.5006	0	0	0
CL.10882	5.7498	0.0529943	NA	0	0	0	0	39.3341	4.42801	2.62181	0.647552
CL.10883	-0.930725	9,7174687569111e-05	0.00234118	3162.1	2175.7	2153.54	2603.61	1586.01	1381.54	1175.88	1150.05
CL.10884	5.20894	NA	NA	0	0	0	0	32.3101	0	0	0
CL.10885	5.53897	NA	NA	0	0	0	0	39.3341	0	0	1.2951
CL.10886	5.54283	NA	NA	0	0	0	0	40.7389	0	0	0
CL.10887	5.03327	0.137899	NA	0	0	0	0	0	0	28.8399	0
CL.10888	2.95447	NA	NA	0	0	0	4.96494	0	0	39.3272	0
CL.10889	0.229476	0.721279	0.940289	99.0735	60.5964	238.53	194.626	95.5256	78.2282	191.392	331.547
CL.1089	0.394528	0.168376	0.517317	10795.7	4397.56	5492.97	9260.6	12293.3	11280.4	8720.14	7068.68
CL.10890	-0.915584	0.13943	0.465512	161.82	138.506	202.159	240.303	210.016	58.3022	45.8817	79.0013
CL.10891	0.178545	0.613522	0.905131	6515.74	1768.84	2175.53	4454.54	4912.55	5579.3	3479.14	2904.92
CL.10892	5.07794	NA	NA	0	0	0	0	29.5006	0	0	0
CL.10893	5.00769	NA	NA	0	0	0	0	28.0958	0	0	0
CL.10894	5.38314	NA	NA	0	0	0	0	0	0	36.7053	0
CL.10895	4.84412	NA	NA	0	0	0	0	0	25.0921	0	0
CL.10896	NA	NA	NA	0	0	0	0	0	0	0	0
CL.10897	NA	NA	NA	0	0	0	0	0	0	0	0
CL.10898	-2.37764	0.367212	0.756722	59.4441	0	25.3756	0	0	16.236	0	0
CL.10899	-6.3222	NA	NA	79.2588	0	0	0	0	0.738002	0	0
CL.109	0.331908	0.868125	0.976272	0	25.9699	0	39.7195	0	5.90402	65.5453	11.6559
CL.1090	5.38553	NA	NA	0	0	0	0	36.5245	0	0	0
CL.10900	5.15956	0.128203	NA	0	0	0	0	0	0	31.4617	0
CL.10901	-5.63997	NA	NA	0	0	0	29.7896	0	0	0	0
CL.10902	-5.91508	0.0813529	NA	36.327	0	0	0	0	0	0	0
CL.10903	-2.02621	0.380683	0.769086	0	17.3132	76.1268	0	0	17.7121	0	5.18042
CL.10904	5.8256	NA	NA	0	0	0	0	0	0	49.8144	0
CL.10905	-1.16012	8,38390977681551e-09	5,18458990352627e-07	4398.87	4517.31	5548.79	4561.78	2194.28	2271.57	1788.07	2258.66
CL.10906	0.996168	0.00798403	0.0801094	789.286	386.662	499.053	266.121	1223.57	993.351	1048.72	602.223
CL.10907	0.337697	0.727282	0.941632	56.1417	25.9699	48.2136	12.9088	42.1437	17.7121	86.5197	34.9678
CL.10908	5.38553	NA	NA	0	0	0	0	36.5245	0	0	0
CL.10909	-0.00341578	0.989168	0.998424	11494.2	8291.6	7610.14	12877.1	11344.4	13343.1	7212.6	8274.42
CL.1091	5.54283	NA	NA	0	0	0	0	40.7389	0	0	0
CL.10910	-0.605922	0.817844	0.965588	69.3515	0	0	0	32.3101	0	13.1091	0
CL.10911	5.35664	0.114146	NA	0	0	0	0	0	0	34.0835	1.94266
CL.10912	4.93385	NA	NA	0	0	0	0	26.691	0	0	0
CL.10913	5.59167	NA	NA	0	0	0	0	42.1437	0	0	0
CL.10914	5.07794	NA	NA	0	0	0	0	29.5006	0	0	0
CL.10915	-1.71592	0.599696	NA	29.7221	0	0	0	0	0	9.17634	0
CL.10916	-2.94348	NA	NA	287.313	0	5.07512	0	37.9293	0	0	0
CL.10917	2.45259	0.455695	NA	0	7.21385	0	0	0	10.332	28.8399	0
CL.10918	6.11083	0.0621433	0.288305	0	0	0	0	42.1437	0	18.3527	0
CL.10919	-0.440145	0.373503	0.762445	234.474	302.982	390.784	224.415	115.895	135.792	382.784	217.577
CL.1092	2.27589	0.0240755	0.167163	82.5613	34.6265	21.9922	0	347.685	213.283	39.3272	68.6405
CL.10920	-0.359277	0.136948	0.460991	1925.33	1327.35	1454.02	1457.71	1291	1292.24	1019.88	1199.27
CL.10921	-1.56204	0.00611697	0.0664638	135.401	129.849	325.653	266.121	84.2873	67.8962	44.5708	93.2475
CL.10922	2.89499	0.158826	0.500143	0	0	0	17.8738	61.8107	48.7081	0	23.9594
CL.10923	3.3272	0.119231	0.425038	0	0	1.69171	6.95091	64.6203	7.38002	0	16.8363
CL.10924	-0.481992	0.160047	0.502165	7882.95	3381.85	2877.59	1938.31	3000.63	2556.44	3458.17	2495.67
CL.10925	NA	NA	NA	0	0	0	0	0	0	0	0
CL.10926	0.177023	0.71289	0.938368	160.169	150.048	190.317	198.597	175.599	267.157	112.738	234.414
CL.10927	-4.64574	0.168504	NA	33.0245	8.65662	0	0	0	1.476	0	0
CL.10928	-1.36483	0.663951	NA	0	0	0	31.7756	7.72634	0.738002	3.93272	0
CL.10929	0.0443132	0.825278	0.967229	2869.83	2920.17	2663.59	2629.43	2946.54	3061.23	2366.18	3050.62
CL.1093	5.00769	NA	NA	0	0	0	0	28.0958	0	0	0
CL.10930	6.1911	0.054635	0.268	0	0	0	0	0	0	52.4362	11.6559
CL.10931	5.66452	NA	NA	0	0	0	0	0	0	44.5708	0
CL.10932	6.00621	NA	NA	0	0	0	0	56.1915	0	0	0
CL.10933	5.43989	NA	NA	0	0	0	0	37.9293	0	0	0
CL.10934	5.66452	NA	NA	0	0	0	0	0	0	44.5708	0
CL.10935	4.89486	0.149169	NA	0	0	0	0	0	0	26.2181	0
CL.10936	-0.369845	0.379191	0.768336	340.152	756.012	438.152	611.68	644.798	329.149	209.745	475.303
CL.10937	-6.15709	0.0695146	NA	42.9319	0	0	0	0	0	0	0
CL.10938	4.85602	NA	NA	0	0	0	0	25.2862	0	0	0
CL.10939	0.50116	0.197806	0.564555	330.245	444.373	378.942	323.714	427.758	281.917	791.787	591.215
CL.1094	5.38148	NA	NA	0	0	0	0	35.1197	0	1.31091	0
CL.10940	0.415929	0.0341363	0.206692	2402.53	2966.34	3026.46	3154.72	3894.78	3788.17	3604.99	4124.26
CL.10941	0.525186	0.382535	0.770319	89.1662	193.331	161.558	57.5933	89.9065	202.213	288.399	142.461
CL.10942	-5.30724	0.00132933	0.0207515	75.9564	17.3132	37.2175	51.6353	0	0	5.24362	0
CL.10943	-1.49905	0.31977	0.715853	19.8147	33.1837	137.028	21.8457	30.9053	0	44.5708	0
CL.10944	-4.57589	0.000748621	0.0132245	161.82	24.5271	85.4311	23.8317	0	0	10.4872	2.59021
CL.10945	-0.224456	0.338324	0.733299	1672.69	1499.04	1448.1	1486.5	1389.34	1485.6	1329.26	1021.84
CL.10946	-3.55953	NA	NA	52.8392	0	0	0	0	4.42801	0	0
CL.10947	5.04325	NA	NA	0	0	0	0	28.7982	0	0	0
CL.10948	-0.991052	0.00396804	0.0483874	769.471	1416.8	598.864	929.436	575.963	512.174	432.599	347.088
CL.10949	5.27568	0.119766	NA	0	0	0	0	0	0	34.0835	0
CL.1095	-0.283963	0.172491	0.523782	4360.89	4380.25	4753.69	4756.41	4289.52	3630.97	2822.38	4244.7
CL.10950	5.27568	0.119766	NA	0	0	0	0	0	0	34.0835	0
CL.10951	0.0564081	0.763301	0.952054	3500.6	3325.59	3473.07	3544.96	3181.85	3673.04	3918.3	3625
CL.10952	-4.29081	0.0487512	0.253471	36.327	69.253	11.8419	0	0	5.90402	0	0
CL.10953	-6.36427	NA	NA	49.5368	0	0	0	0	0	0	0
CL.10954	-5.90226	NA	NA	0	0	0	35.7475	0	0	0	0
CL.10955	5.15956	0.128203	NA	0	0	0	0	0	0	31.4617	0
CL.10956	0.084302	0.940117	0.99093	0	132.735	72.7433	37.7335	80.0729	16.236	136.334	25.9021
CL.10957	0.756174	0.541516	0.869899	0	86.5662	35.5258	3.97195	49.1676	41.3281	26.2181	95.8377
CL.10958	5.93651	0.0797582	0.327907	0	0	0	0	47.0604	0	0	6.47552
CL.10959	0.470081	0.128373	0.444057	501.973	1005.61	792.564	798.362	1270.63	1002.21	1266.33	755.693
CL.1096	0.498282	0.129186	0.445932	4884.33	4351.4	3214.24	1274	5708.36	5469.33	4647.16	3555.06
CL.10960	1.56558	0.603737	0.900128	0	0	0	15.8878	28.0958	19.1881	0	0
CL.10961	5.79304	NA	NA	0	0	0	0	48.4652	0	0	0
CL.10962	1.60048	0.625271	NA	0	0	9.30438	0	0	0	28.8399	0
CL.10963	-4.15501	0.218614	NA	29.7221	0	0	0	0	1.476	0	0
CL.10964	-0.396446	0.123765	0.434659	2655.17	3651.65	5601.24	3256.01	2489.29	2610.31	3030.81	3393.82
CL.10965	5.54549	0.101849	NA	0	0	0	0	14.7503	0	26.2181	0
CL.10966	0.835087	0.00237199	0.0326809	2181.27	1650.53	1684.94	1024.76	2759.71	2284.85	3872.41	2750.15
CL.10967	0.588209	0.516579	0.856514	216.311	11.5422	5.07512	164.836	214.933	200.737	86.5197	94.5426
CL.10968	0.0336048	0.87928	0.977987	29168.9	17270	17592.9	25019.3	24842.3	25772.5	21033.5	19497.8
CL.10969	-0.440458	0.0995574	0.380553	1036.97	1768.84	1558.06	1321.67	837.254	1130.62	1013.33	1208.98
CL.1097	5.70269	0.0924417	NA	0	0	0	0	33.7149	11.808	0	0
CL.10970	5.65474	0.0952339	NA	0	0	0	0	4.91676	0	39.3272	0
CL.10971	-6.85107	NA	NA	69.3515	0	0	0	0	0	0	0
CL.10972	5.51777	NA	NA	0	0	0	0	40.0365	0	0	0
CL.10973	5.61549	NA	NA	0	0	0	0	42.846	0	0	0
CL.10974	-0.855648	0.0104317	0.0958537	1063.39	833.921	677.528	516.353	516.962	451.657	401.137	336.727
CL.10975	5.80978	0.0864436	NA	0	0	0	0	37.2269	11.808	0	0
CL.10976	20.6983	NA	NA	0	0	0	0	59.0011	0	0	0
CL.10977	-6.2644	NA	NA	46.2343	0	0	0	0	0	0	0
CL.10978	5.14493	NA	NA	0	0	0	0	30.9053	0	0	0
CL.10979	5.59167	NA	NA	0	0	0	0	42.1437	0	0	0
CL.1098	5.21291	NA	NA	0	0	0	0	0	0	0	32.3776
CL.10980	-3.45523	0.25606	0.6495	227.869	0	0	21.8457	18.2623	4.42801	0	0
CL.10981	5.15956	0.128203	NA	0	0	0	0	0	0	31.4617	0
CL.10982	-3.13407	NA	NA	56.1417	0	0	0	6.32155	0	0	0
CL.10983	5.89386	NA	NA	0	0	0	0	51.9772	0	0	0
CL.10984	4.85602	NA	NA	0	0	0	0	25.2862	0	0	0
CL.10985	6.1322	0.0602373	0.28373	0	0	0	0	45.6556	0	15.7309	0
CL.10986	-5.96477	0.0787961	NA	0	37.512	0	0	0	0	0	0
CL.10987	5.4559	0.107544	NA	0	0	0	0	29.5006	8.85603	0	0
CL.10988	5.43989	NA	NA	0	0	0	0	37.9293	0	0	0
CL.10989	5.85437	NA	NA	0	0	0	0	50.5724	0	0	0
CL.1099	-0.303686	0.820159	0.966141	9.90735	49.0542	37.2175	21.8457	36.5245	14.76	0	44.0335
CL.10990	-3.21867	0.155824	0.495398	46.2343	0	39.7551	11.9158	0	0	0	10.3608
CL.10991	5.07794	NA	NA	0	0	0	0	29.5006	0	0	0
CL.10992	-1.37591	0.470223	0.831173	62.7466	0	25.3756	21.8457	0	16.236	0	25.9021
CL.10993	0.481307	0.0228743	0.161802	12869.7	9441.49	8927.13	7817.79	14864.1	15380.7	11979.1	12290.5
CL.10994	5.27024	NA	NA	0	0	0	0	33.7149	0	0	0
CL.10995	5.96972	NA	NA	0	0	0	0	54.7868	0	0	0
CL.10996	0.784063	0.0150619	0.123287	3376.76	1685.16	2812.46	2008.81	3195.19	2647.21	7410.55	3768.75
CL.10997	-0.913919	NA	NA	0	0	0	31.7756	16.8575	0	0	0
CL.10998	1.30476	0.666248	NA	0	0	3.38341	9.92987	0	0	26.2181	7.12307
CL.10999	1.38326	0.332471	0.728416	0	7.21385	27.9131	8.93689	45.6556	13.284	40.6381	16.8363
CL.11	NA	NA	NA	0	0	0	0	0	0	0	0
CL.110	-5.16482	0.0469389	0.249225	59.4441	37.512	0	0	0	0	0	2.59021
CL.1100	-0.747702	0.661255	0.921961	42.9319	69.253	8.45853	0	0	11.808	5.24362	54.3944
CL.11000	1.71917	0.222226	0.604041	0	21.6416	56.6721	0	24.5838	22.1401	170.418	42.7384
CL.11001	-6.91834	NA	NA	72.6539	0	0	0	0	0	0	0
CL.11002	5.85437	NA	NA	0	0	0	0	50.5724	0	0	0
CL.11003	21.0156	NA	NA	0	0	0	0	74.4538	0	0	0
CL.11004	4.66387	NA	NA	0	0	0	0	0	22.1401	0	0
CL.11005	2.79865	0.12694	0.441029	3.30245	11.5422	0	0	42.1437	2.95201	28.8399	27.1972
CL.11006	-0.327411	0.199265	0.566918	1747	2571.02	2181.45	2204.43	2277.16	1655.34	1225.7	1776.23
CL.11007	0.474486	0.720721	0.940163	0	46.1687	30.4507	21.8457	25.2862	4.42801	70.7889	36.9105
CL.11008	-0.132209	0.780807	0.956658	142.005	178.904	230.072	220.443	146.098	252.397	171.729	134.691
CL.11009	0.340813	0.141662	0.470401	1109.62	1255.21	1002.34	1169.74	1335.95	1360.14	1389.56	1658.38
CL.1101	1.96602	0.2368	0.623882	13.2098	51.9397	0	0	119.407	47.2321	86.5197	0
CL.11010	1.05052	0.350373	0.742504	0	25.9699	21.9922	65.5372	30.9053	61.9922	97.007	46.6237
CL.11011	-0.850167	0.694682	0.933784	0	8.65662	16.9171	39.7195	0	0	28.8399	7.77062
CL.11012	0.223678	0.364085	0.754114	4907.44	2912.95	3791.11	4679.95	5829.87	5600.7	3852.75	3738.32
CL.11013	-0.188666	0.403599	0.784317	2004.59	2944.69	2474.97	2326.57	1947.74	2238.36	1854.93	2513.15
CL.11014	-0.903579	0.0871149	0.346963	75.9564	369.349	494.824	459.753	174.194	205.165	176.972	192.97
CL.11015	-6.17868	0.0685312	NA	0	37.512	0	5.95792	0	0	0	0
CL.11016	-0.98589	0.117201	0.420536	6756.82	2432.51	1596.97	3347.36	2298.94	3014.74	768.191	1052.92
CL.11017	-0.399204	0.274662	0.669988	426.016	516.512	426.31	460.746	224.766	298.153	385.406	479.188
CL.11018	0.0228318	0.937187	0.990554	612.605	799.295	984.573	757.649	616	827.301	803.585	959.672
CL.11019	0.184696	0.516047	0.856359	756.261	546.81	647.923	514.367	684.132	673.796	676.427	766.054
CL.1102	0.302133	0.143498	0.473854	2163.11	2796.09	2203.45	2091.23	2709.84	2763.82	2844.66	3089.47
CL.11020	5.27024	NA	NA	0	0	0	0	33.7149	0	0	0
CL.11021	5.48316	NA	NA	0	0	0	0	0	0	39.3272	0
CL.11022	5.59167	NA	NA	0	0	0	0	42.1437	0	0	0
CL.11023	5.20894	NA	NA	0	0	0	0	32.3101	0	0	0
CL.11024	4.96204	NA	NA	0	0	0	0	0	0	0	27.1972
CL.11025	0.256382	0.188102	0.550491	2519.77	2938.92	2760.02	2948.18	3472.64	2917.32	3447.68	3502.61
CL.11026	5.07794	NA	NA	0	0	0	0	29.5006	0	0	0
CL.11027	0.761748	0.000833177	0.0143737	18592.8	15232.8	15255.8	10750.1	21137.9	26606.5	32928.6	20772.2
CL.11028	-0.036737	0.871035	0.976432	9184.12	5372.88	5610.54	5660.03	5758.93	6989.62	6689.55	5736.66
CL.11029	0.723934	0.00418179	0.0503457	1274.75	940.686	844.161	1173.71	1643.6	1890.76	2024.04	1432.38
CL.1103	5.27568	0.119766	NA	0	0	0	0	0	0	34.0835	0
CL.11030	0.0417565	0.82812	0.96736	3388.32	3689.16	3871.47	3981.88	3330.05	4282.63	3856.68	3902.15
CL.11031	0.243012	0.262883	0.657523	2892.95	4716.42	3939.14	3218.27	4172.92	4177.09	4328.61	4797.71
CL.11032	0.380466	0.0308055	0.194306	7362.82	8379.61	8055.9	8070.01	11376.7	11035.3	9483.09	9589.6
CL.11033	0.584486	0.672075	0.92651	14.861	17.3132	14.3795	40.7125	0	19.1881	79.9652	32.3776
CL.11034	-0.342484	0.099758	0.380764	12252.1	12914.2	18399	16198.6	10256.4	11140.1	11386.5	14354.9
CL.11035	-2.52918	0.356139	0.746454	39.6294	0	33.8341	0	12.6431	0	0	0
CL.11036	-0.26708	0.175633	0.529388	5125.4	6088.49	5653.68	6466.33	5692.2	5087.05	4413.82	4197.43
CL.11037	-1.45139	0.504026	0.850955	41.2806	31.7409	5.07512	0	0	0	24.9072	3.88531
CL.11038	0.880931	0.000209795	0.00458294	25128.4	22841.9	21823	13610.9	29947.3	32439.6	49206.1	41998.3
CL.11039	5.00432	NA	NA	0	0	0	0	0	28.0441	0	0
CL.1104	5.15956	0.128203	NA	0	0	0	0	0	0	31.4617	0
CL.11040	-0.189591	0.495154	0.846139	918.081	1396.6	1011.64	1102.22	879.398	752.762	1255.85	997.23
CL.11041	-0.997408	0.000641893	0.0116221	1436.57	1180.19	1345.75	1485.51	616.702	640.586	471.926	997.23
CL.11042	5.20409	NA	NA	0	0	0	0	30.9053	0	0	1.2951
CL.11043	-0.28879	0.387414	0.774476	627.466	699.744	658.919	793.397	320.994	566.786	765.569	624.24
CL.11044	4.80827	0.114039	0.414013	0	0	1.69171	0	30.9053	0	28.8399	0
CL.11045	0.311332	0.198093	0.565049	1150.9	1240.78	1449.79	1455.72	1413.92	1725.45	1407.91	2026.84
CL.11046	5.27024	NA	NA	0	0	0	0	33.7149	0	0	0
CL.11047	5.68466	NA	NA	0	0	0	0	44.9532	0	0	0
CL.11048	5.03327	0.137899	NA	0	0	0	0	0	0	28.8399	0
CL.11049	0.380207	0.119999	0.427023	1149.25	1879.93	1465.86	1945.26	2295.42	2047.22	1878.53	2162.18
CL.1105	5.43989	NA	NA	0	0	0	0	37.9293	0	0	0
CL.11050	-0.399794	0.685803	0.930826	69.3515	46.1687	89.6604	52.6283	88.5017	1.476	47.1926	58.2797
CL.11051	0.911058	0.518844	0.857335	0	75.0241	32.9883	0	41.4413	22.1401	89.1416	50.509
CL.11052	0.298863	0.232187	0.617874	961.013	1194.61	1358.44	1548.07	1725.08	1718.07	1430.2	1357.27
CL.11053	5.32903	NA	NA	0	0	0	0	35.1197	0	0	0
CL.11054	0.915721	0.515843	0.856359	29.7221	4.32831	5.07512	11.9158	23.8814	2.21401	52.4362	17.4839
CL.11055	0.695286	0.815248	0.965298	0	20.1988	6.76682	0	43.5484	0	0	0
CL.11056	-0.268204	0.422427	0.798267	561.417	585.765	1124.98	1008.88	500.105	667.154	770.812	790.013
CL.11057	5.32903	NA	NA	0	0	0	0	35.1197	0	0	0
CL.11058	5.15956	0.128203	NA	0	0	0	0	0	0	31.4617	0
CL.11059	5.72899	NA	NA	0	0	0	0	46.358	0	0	0
CL.1106	6.00621	NA	NA	0	0	0	0	56.1915	0	0	0
CL.11060	5.03327	0.137899	NA	0	0	0	0	0	0	28.8399	0
CL.11061	0.872424	0.040034	0.226714	274.103	173.132	499.053	460.746	870.969	380.809	825.87	503.795
CL.11062	5.68466	NA	NA	0	0	0	0	44.9532	0	0	0
CL.11063	5.03327	0.137899	NA	0	0	0	0	0	0	28.8399	0
CL.11064	20.8674	NA	NA	0	0	0	0	66.0251	0	0	0
CL.11065	0.0957145	0.700509	0.935011	1756.9	2947.58	2973.17	2191.52	2378.31	2143.16	3032.12	2996.22
CL.11066	5.71529	0.0728516	NA	0	0	0	0	26.691	8.85603	0	10.3608
CL.11067	0.267741	0.411435	0.791057	1486.1	721.385	604.785	731.832	1000.21	1156.45	901.903	1202.5
CL.11068	0.482647	0.0504269	0.257826	823.962	1276.85	1092	1181.65	1344.38	1508.48	1701.56	1561.25
CL.11069	-6.36427	NA	NA	49.5368	0	0	0	0	0	0	0
CL.1107	-0.0304489	0.906493	0.982439	1697.46	1268.2	1510.69	2282.88	1997.61	1706.26	1439.37	1475.12
CL.11070	NA	NA	NA	0	0	0	0	0	0	0	0
CL.11071	0.848967	0.000648105	0.0117041	1358.96	1591.38	1109.76	1244.21	2903	2230.98	1743.5	2669.86
CL.11072	NA	NA	NA	0	0	0	0	0	0	0	0
CL.11073	NA	NA	NA	0	0	0	0	0	0	0	0
CL.11074	NA	NA	NA	0	0	0	0	0	0	0	0
CL.11075	1.05225	0.0224097	0.159774	237.776	582.879	120.111	230.373	657.441	569.738	776.056	422.204
CL.11076	6.80688	0.00617523	0.0669572	0	0	0	0	56.1915	0	31.4617	10.3608
CL.11077	5.85437	NA	NA	0	0	0	0	50.5724	0	0	0
CL.11078	5.19921	NA	NA	0	0	0	0	29.5006	0	0	2.59021
CL.11079	-1.97582	0.441974	0.811448	59.4441	7.21385	0	0	0	0	6.55453	10.3608
CL.1108	-0.801322	0.00867599	0.0850859	8675.54	3751.2	4229.26	3044.5	2288.4	2804.41	3639.07	2572.08
CL.11080	5.32903	NA	NA	0	0	0	0	35.1197	0	0	0
CL.11081	-0.169926	0.617268	0.905879	964.316	675.217	482.136	442.872	550.677	534.314	673.805	518.689
CL.11082	0.433869	0.748517	0.947284	0	51.9397	20.3005	21.8457	47.7628	5.16602	57.6798	16.8363
CL.11083	-0.213933	0.483914	0.840047	1496.01	970.984	1095.38	1499.41	1319.8	1251.65	613.504	1175.95
CL.11084	0.136181	0.619976	0.906497	7136.6	5693.17	4311.31	2597.65	5253.91	5163.06	6228.11	5043.13
CL.11085	0.0487846	0.840346	0.970642	1834.51	1780.38	2168.77	1335.57	1758.09	1529.14	2110.56	1967.91
CL.11086	0.0857831	0.670472	0.92583	2972.21	3635.78	3323.36	3121.95	4024.02	3159.39	3615.48	3055.15
CL.11087	5.72899	NA	NA	0	0	0	0	46.358	0	0	0
CL.11088	6.0418	NA	NA	0	0	0	0	57.5963	0	0	0
CL.11089	-0.181962	0.381209	0.769432	2892.95	2374.8	2387.84	2532.12	2380.41	1986.7	2514.32	2099.36
CL.1109	5.38553	NA	NA	0	0	0	0	36.5245	0	0	0
CL.11090	-0.301887	0.1292	0.445932	3487.39	2703.75	3311.51	3439.71	2709.13	2600.72	2755.52	2434.8
CL.11091	0.23344	0.568519	0.883535	376.479	802.18	275.748	639.484	779.658	751.286	343.457	584.739
CL.11092	-3.30467	0.0626201	0.289422	125.493	17.3132	21.9922	11.9158	0	17.7121	0	0
CL.11093	0.020537	0.980108	0.998116	89.1662	112.536	76.1268	9.92987	73.049	39.8521	78.6543	99.723
CL.11094	5.07794	NA	NA	0	0	0	0	29.5006	0	0	0
CL.11095	-0.149081	0.918591	0.984723	24.7684	17.3132	47.3678	49.6494	0	5.90402	117.981	2.59021
CL.11096	-0.541309	0.364945	0.754584	12940.7	5664.32	4988.84	2063.43	3062.44	5064.17	6654.16	2849.23
CL.11097	0.508551	0.611388	0.904161	52.8392	25.9699	28.759	20.8527	94.8232	10.332	28.8399	47.9188
CL.11098	-0.162238	0.728982	0.941816	151.913	388.105	347.646	578.912	279.553	478.225	359.188	195.561
CL.11099	5.59167	NA	NA	0	0	0	0	42.1437	0	0	0
CL.111	-0.732815	0.697405	0.93401	0	40.3976	16.0712	13.9018	0	5.90402	5.24362	31.0825
CL.1110	5.27024	NA	NA	0	0	0	0	33.7149	0	0	0
CL.11100	5.20894	NA	NA	0	0	0	0	32.3101	0	0	0
CL.11101	-7.9383	NA	NA	145.308	0	0	1.98597	0	0	0	0
CL.11102	0.590861	0.790619	0.958735	56.1417	0	0	0	26.691	0	36.7053	20.7217
CL.11103	-1.35125	0.520931	0.85802	36.327	37.512	8.45853	0	0	8.85603	23.5963	0
CL.11104	5.00432	NA	NA	0	0	0	0	0	28.0441	0	0
CL.11105	-1.1353	0.0267045	0.177746	904.872	903.174	578.563	280.022	219.147	185.977	671.184	139.871
CL.11106	5.48316	NA	NA	0	0	0	0	0	0	39.3272	0
CL.11107	5.12211	0.0407456	0.229258	0	0	1.69171	0	36.5245	25.0921	0	12.951
CL.11108	-0.018465	0.931693	0.988921	2717.92	2749.92	2559.55	2546.02	2858.74	3136.51	2113.18	2327.3
CL.11109	-0.353717	0.267891	0.663362	729.842	522.283	560.8	497.487	571.749	439.111	403.759	391.769
CL.1111	0.0429865	0.952575	0.993832	4266.77	3295.29	1833.81	389.251	2742.85	1236.89	4202.76	1897.97
CL.11110	1.06659	0.743858	NA	0	0	13.5336	0	0	0	28.8399	0
CL.11111	-0.178444	0.571094	0.884746	577.929	1145.56	1065.77	701.049	602.654	755.714	825.87	901.392
CL.11112	-0.248838	0.177592	0.532932	9900.75	8832.64	8343.49	7397.76	7764.97	6966	7591.45	6688.56
CL.11113	0.274733	0.323576	0.719902	8801.03	4081.6	4186.13	6373.99	8008	8806.58	4846.42	6693.1
CL.11114	-0.0866073	0.807096	0.963164	376.479	1069.09	636.081	589.834	644.798	509.222	671.184	690.938
CL.11115	0.340899	0.365221	0.75478	483.809	314.524	276.594	523.304	433.377	638.372	347.39	602.871
CL.11116	0.733025	0.67886	0.928865	0	0	37.2175	45.6774	105.359	14.76	0	18.1315
CL.11117	1.04566	0.695954	0.933878	0	23.0843	0	0	0	4.42801	31.4617	11.6559
CL.11118	-0.303071	0.390485	0.776943	353.362	389.548	333.266	349.532	334.34	245.755	309.374	266.144
CL.11119	5.07794	NA	NA	0	0	0	0	29.5006	0	0	0
CL.1112	-3.3385	0.33251	NA	0	0	5.92097	0	0	0	0	0
CL.11120	5.43989	NA	NA	0	0	0	0	37.9293	0	0	0
CL.11121	6.00621	NA	NA	0	0	0	0	56.1915	0	0	0
CL.11122	-0.489965	0.147811	0.481685	7394.19	2596.99	2535.87	3499.29	4211.56	2730.61	2493.34	1972.44
CL.11123	-0.674735	0.194385	0.560029	37788.3	11449.8	10174.8	14875.9	12808.9	13775.5	10892.3	9059.9
CL.11124	-0.472884	0.0586665	0.279645	15632.2	7395.64	7781.85	10595.2	8468.07	7422.83	6386.73	7551.1
CL.11125	5.59167	NA	NA	0	0	0	0	42.1437	0	0	0
CL.11126	-1.05478	0.262643	0.657159	0	269.798	107.423	224.415	78.6682	56.0882	65.5453	89.3622
CL.11127	0.933951	0.365562	0.755336	46.2343	14.4277	62.5931	3.97195	74.4538	17.7121	104.872	46.6237
CL.11128	-0.173057	0.350866	0.742943	9070.18	7560.12	7342	8458.27	7903.34	7747.55	6527	6583.66
CL.11129	-0.763658	0.0254819	0.172472	726.539	1165.76	688.524	663.316	692.561	376.381	380.163	459.762
CL.1113	NA	NA	NA	0	0	0	0	0	0	0	0
CL.11130	-0.047984	0.813074	0.964148	5726.45	6545.85	5613.93	7243.84	5313.61	6782.98	7031.7	5183.01
CL.11131	-0.572261	0.0853006	0.34199	9048.72	7702.95	11311.6	2824.06	6987.42	4993.32	3451.61	5339.07
CL.11132	-0.00359495	0.992207	0.999076	297.221	1105.16	897.45	847.018	807.753	704.792	778.678	849.588
CL.11133	0.837065	0.263766	0.658833	201.45	72.1385	103.194	9.92987	199.48	208.117	76.0325	204.626
CL.11134	-0.671149	0.690338	0.932493	39.6294	77.9096	3.38341	0	0	13.284	31.4617	31.0825
CL.11135	0.0328945	0.989613	0.998469	0	25.9699	0	18.8668	43.5484	2.21401	0	0
CL.11136	0.938869	6,9631243286922e-07	2,8621599804723e-05	13261	11172.8	12485.6	9303.3	21154.7	20069.2	24852.1	22532.2
CL.11137	0.263658	0.309267	0.705411	696.817	705.515	887.3	945.324	962.28	885.603	1014.64	1024.43
CL.11138	-0.522594	0.222785	0.604741	396.294	295.768	328.191	234.345	130.645	261.253	277.912	203.979
CL.11139	4.72304	NA	NA	0	0	0	2.97896	81.4777	0.738002	0	0
CL.1114	5.66452	NA	NA	0	0	0	0	0	0	44.5708	0
CL.11140	-0.0429353	0.886033	0.979486	2632.05	1641.87	1292.46	1030.72	1403.38	1816.96	1683.2	1495.84
CL.11141	NA	NA	NA	0	0	0	0	0	0	0	0
CL.11142	1.91623	NA	NA	0	8.65662	0	0	32.3101	0	0	0
CL.11143	0.145823	0.478267	0.835805	2982.11	4186.92	4085.47	3806.12	3679.84	4028.02	4221.12	4736.19
CL.11144	5.07794	NA	NA	0	0	0	0	29.5006	0	0	0
CL.11145	4.89486	0.149169	NA	0	0	0	0	0	0	26.2181	0
CL.11146	-1.04667	0.0245138	0.168783	914.779	877.204	576.872	350.525	152.42	256.087	646.276	263.554
CL.11147	5.63891	NA	NA	0	0	0	0	43.5484	0	0	0
CL.11148	0.342111	0.115405	0.416931	3594.72	3485.73	3046.76	2481.48	3716.37	3721.01	4898.85	3645.72
CL.11149	0.67752	0.0543213	0.267364	1486.1	747.355	814.556	431.949	1191.96	1354.23	1841.82	1174.01
CL.1115	4.89486	0.149169	NA	0	0	0	0	0	0	26.2181	0
CL.11150	-0.367779	NA	NA	52.8392	0	0	0	40.7389	0	0	0
CL.11151	0.106655	0.683492	0.929839	5349.97	2861.01	2758.33	3897.48	4302.87	4598.49	4214.56	2888.73
CL.11152	-0.697294	0.748895	0.947365	49.5368	11.5422	0	3.97195	0	23.6161	0	16.1888
CL.11153	5.74731	NA	NA	0	0	0	0	0	0	47.1926	0
CL.11154	5.03327	0.137899	NA	0	0	0	0	0	0	28.8399	0
CL.11155	5.49228	NA	NA	0	0	0	0	39.3341	0	0	0
CL.11156	0.365375	0.0887956	0.351272	1763.51	2596.99	2128.17	2243.16	2599.56	2811.79	3130.44	2709.36
CL.11157	0.0288383	0.92518	0.98774	459.041	603.078	644.54	530.255	546.463	482.653	723.62	532.288
CL.11158	0.0123218	0.980699	0.998293	151.913	204.873	183.55	107.243	162.253	107.748	153.376	229.233
CL.11159	-0.158324	0.483623	0.83995	57839.1	61337.9	41890	60579.2	53299.1	57896.3	32173.5	55234.2
CL.1116	-5.90806	0.0817194	NA	0	36.0693	0	0	0	0	0	0
CL.11160	5.07794	NA	NA	0	0	0	0	29.5006	0	0	0
CL.11161	5.03327	0.137899	NA	0	0	0	0	0	0	28.8399	0
CL.11162	0.719847	0.469168	0.83077	118.888	0	67.6682	39.7195	82.8825	58.3022	99.6288	131.453
CL.11163	0.951248	NA	NA	19.8147	2.88554	100.656	0	66.0251	59.0402	58.9907	55.6895
CL.11164	0.364108	0.146692	0.479163	1013.85	1806.35	1464.17	1479.55	1729.29	1625.82	1966.36	2099.36
CL.11165	5.85437	NA	NA	0	0	0	0	50.5724	0	0	0
CL.11166	0.03426	0.867452	0.976272	8751.5	13419.2	13266.4	9990.45	11359.1	10310.6	12250.4	12602
CL.11167	-0.433734	0.0884214	0.350157	1803.14	3309.72	3557.66	2764.48	1963.89	1977.85	1987.33	2538.4
CL.11168	-0.47636	0.0429617	0.235549	8796.08	8988.46	11540	6836.72	5531.35	5741.66	8953.48	5770.98
CL.11169	0.33044	0.303815	0.699522	544.904	523.726	358.642	651.4	561.915	819.182	652.831	578.911
CL.1117	5.74731	NA	NA	0	0	0	0	0	0	47.1926	0
CL.11170	0.0801075	0.762533	0.951756	1152.56	709.843	914.367	872.836	887.826	1035.42	1009.4	924.704
CL.11171	5.07794	NA	NA	0	0	0	0	29.5006	0	0	0
CL.11172	-0.266737	0.594436	0.89653	125.493	139.949	240.222	179.731	118.002	129.15	141.578	181.962
CL.11173	-5.63997	NA	NA	0	0	0	29.7896	0	0	0	0
CL.11174	5.87272	NA	NA	0	0	0	0	50.5724	0	0	0.647552
CL.11175	0.873892	NA	NA	29.7221	0	0	0	54.0844	0	0	0
CL.11176	-0.0781549	0.863374	0.97603	607.651	219.301	429.693	1062.5	625.833	767.522	492.9	311.472
CL.11177	-0.0309955	0.945347	0.991244	191.542	493.427	585.33	593.806	285.172	428.041	797.03	318.596
CL.11178	5.36746	0.113411	NA	0	0	0	0	30.9053	5.16602	0	0
CL.11179	5.38553	NA	NA	0	0	0	0	36.5245	0	0	0
CL.1118	5.89386	NA	NA	0	0	0	0	51.9772	0	0	0
CL.11180	-0.208164	0.596336	0.897233	270.801	516.512	536.271	504.438	330.125	442.801	251.694	557.542
CL.11181	3.26933	NA	NA	0	0	4.22926	0	40.7389	0	0	1.2951
CL.11182	0.0639071	0.934312	0.990063	49.5368	75.0241	91.3521	59.5792	22.4766	60.5162	141.578	64.7552
CL.11183	0.0681466	0.778932	0.956285	1178.98	1429.79	1504.77	1580.84	1241.83	1311.43	1667.47	1752.28
CL.11184	6.113	0.0354616	0.211497	0	0	0	0	35.1197	0	17.0418	8.41817
CL.11185	-0.347601	0.115669	0.417366	2699.75	2428.18	2128.17	3283.81	2109.99	1959.4	2242.96	1971.8
CL.11186	5.09292	NA	NA	0	0	0	0	0	0	0	29.7874
CL.11187	0.146347	0.806523	0.963164	3454.36	1399.49	1157.13	2367.28	3752.19	2997.77	663.318	1857.18
CL.11188	5.03327	0.137899	NA	0	0	0	0	0	0	28.8399	0
CL.11189	-4.64957	0.000532033	0.00990846	369.875	141.391	466.911	666.294	0	17.7121	47.1926	1.2951
CL.1119	0.094328	0.653213	0.91892	2290.25	2295.45	1900.63	2289.83	2215.35	2433.19	2661.14	2059.86
CL.11190	0.106133	0.883926	0.979288	29.7221	75.0241	165.787	95.3268	136.264	41.3281	83.8979	133.396
CL.11191	5.57669	NA	NA	0	0	0	0	0	0	41.949	0
CL.11192	5.07794	NA	NA	0	0	0	0	29.5006	0	0	0
CL.11193	-6.07191	NA	NA	0	40.3976	0	0	0	0	0	0
CL.11194	-5.91508	0.0813529	NA	36.327	0	0	0	0	0	0	0
CL.11195	-0.985002	0.0195459	0.145634	723.237	903.174	384.017	571.961	369.459	503.318	272.668	158.003
CL.11196	-0.756625	0.240988	0.628997	1344.1	248.156	200.467	170.794	404.579	191.881	479.791	85.4769
CL.11197	5.77201	NA	NA	0	0	0	0	47.7628	0	0	0
CL.11198	6.12456	0.0380384	0.220261	0	0	0	0	50.5724	0	6.55453	3.88531
CL.11199	5.59167	NA	NA	0	0	0	0	42.1437	0	0	0
CL.112	0.0493228	0.829048	0.967756	1274.75	1325.91	1574.98	1527.21	1326.12	1628.03	1347.61	1600.75
CL.1120	-2.84443	0.018871	0.142644	84.2125	60.5964	126.032	12.9088	2.80958	10.332	0	25.9021
CL.11200	-5.77692	0.0888198	NA	33.0245	0	0	0	0	0	0	0
CL.11201	-1.69043	NA	NA	151.913	0	0	0	36.5245	0	10.4872	0
CL.11202	-5.77692	0.0888198	NA	33.0245	0	0	0	0	0	0	0
CL.11203	-0.200703	0.408101	0.787848	1588.48	2627.28	1849.03	1920.44	1435.69	1792.61	1924.41	1796.31
CL.11204	0.340527	0.169879	0.519866	888.359	946.457	1056.47	1058.52	988.269	1241.32	1428.89	1346.26
CL.11205	-0.364247	0.17879	0.534651	6661.04	4195.58	3559.35	2774.41	3939.03	3160.13	3476.52	2775.41
CL.11206	0.0177488	0.947057	0.99173	1311.07	946.457	908.446	1495.44	1128.05	1371.21	1132.62	1086.59
CL.11207	-1.32658	0.0273809	0.180265	7527.94	1350.43	1986.06	1789.36	1772.84	1089.29	1177.19	1005
CL.11208	0.0870238	0.661089	0.921853	2902.85	3151.01	2654.29	2397.07	2820.82	2897.4	3064.9	3010.47
CL.11209	1.43687	0.597503	0.897644	0	0	25.3756	0	0	11.808	57.6798	0
CL.1121	-4.71218	NA	NA	0	0	0	39.7195	0	0	0	1.2951
CL.11210	0.977038	0.0341379	0.206692	221.264	122.635	174.246	135.046	365.245	415.495	166.485	336.079
CL.11211	5.38553	NA	NA	0	0	0	0	36.5245	0	0	0
CL.11212	5.96972	NA	NA	0	0	0	0	54.7868	0	0	0
CL.11213	-0.366339	0.0673181	0.30081	2394.28	2734.05	2363.31	2393.1	2045.37	1797.04	1932.27	1892.79
CL.11214	0.376438	0.146038	0.478077	637.373	714.171	664.84	788.432	811.968	924.717	1014.64	891.679
CL.11215	0.144208	0.722282	0.940371	2584.17	735.813	987.11	829.144	2263.11	1459.03	1136.55	813.325
CL.11216	-0.324482	0.361252	0.75177	12156.3	5883.62	4952.47	2280.89	5605.11	4901.81	5832.22	3840.63
CL.11217	NA	NA	NA	0	0	0	0	0	0	0	0
CL.11218	-1.11671	0.0191162	0.143561	2455.37	914.716	629.315	470.676	690.454	680.438	461.439	227.291
CL.11219	NA	NA	NA	0	0	0	0	0	0	0	0
CL.1122	2.3135	0.296705	0.69205	0	0	0	13.9018	2.80958	12.546	39.3272	15.5412
CL.11220	5.41085	NA	NA	0	0	0	0	36.5245	0	0	0.647552
CL.11221	-0.892273	0.386371	0.773074	1289.61	222.187	143.795	47.6634	307.649	194.833	361.81	53.0993
CL.11222	-7.18711	NA	NA	87.515	0	0	0	0	0	0	0
CL.11223	-0.309588	0.442191	0.811513	2171.36	932.03	567.567	843.046	1040.95	1004.42	1120.82	474.008
CL.11224	-1.10072	0.000350456	0.00698233	22823.2	9147.16	9762.83	6589.46	6061.66	5587.41	5484.83	5395.4
CL.11225	5.20894	NA	NA	0	0	0	0	32.3101	0	0	0
CL.11226	-0.629917	0.035484	0.211497	1946.8	973.87	1004.03	1302.8	812.67	1046.49	731.485	784.833
CL.11227	6.27954	NA	NA	0	0	0	0	0	0	68.1671	0
CL.11228	5.07794	NA	NA	0	0	0	0	29.5006	0	0	0
CL.11229	21.4412	NA	NA	0	0	0	0	101.145	0	0	0
CL.1123	5.15956	0.128203	NA	0	0	0	0	0	0	31.4617	0
CL.11230	5.32903	NA	NA	0	0	0	0	35.1197	0	0	0
CL.11231	-0.228872	0.594223	0.89653	1591.78	392.434	493.978	873.829	939.804	572.69	429.977	914.343
CL.11232	2.79878	0.193938	0.559477	0	0	10.1502	0	8.42873	16.9741	14.42	33.0251
CL.11233	5.38314	NA	NA	0	0	0	0	0	0	36.7053	0
CL.11234	5.63891	NA	NA	0	0	0	0	43.5484	0	0	0
CL.11235	4.93385	NA	NA	0	0	0	0	26.691	0	0	0
CL.11236	-1.11279	0.696661	NA	0	11.5422	16.9171	0	0	1.476	2.62181	9.06573
CL.11237	NA	NA	NA	0	0	0	0	0	0	0	0
CL.11238	0.0960728	0.885186	0.979288	161.82	100.994	48.2136	63.5512	111.681	67.8962	142.889	77.0587
CL.11239	5.6353	NA	NA	0	0	0	0	42.1437	0	0	1.2951
CL.1124	6.01461	0.0445453	0.241061	0	0	0	0	4.21437	23.6161	28.8399	0
CL.11240	0.148095	0.739864	0.944926	680.305	643.476	223.305	367.405	674.298	704.054	235.963	502.5
CL.11241	-0.0444348	0.900704	0.981516	369.875	588.65	554.879	488.55	460.771	295.201	612.193	575.026
CL.11242	-0.0313857	0.95088	0.993385	85.8637	291.44	465.219	260.163	238.814	246.493	220.232	374.933
CL.11243	5.7078	0.081112	NA	0	0	0	0	1.40479	0	36.7053	7.77062
CL.11244	-0.309041	0.92553	NA	0	0	0	8.93689	0	0.738002	0	6.47552
CL.11245	-0.569846	0.0111986	0.100551	1955.05	2314.2	2737.18	2371.25	1482.05	1740.95	1347.61	1747.1
CL.11246	-0.362962	0.453534	0.820185	165.123	565.566	485.52	417.055	150.312	522.506	264.803	332.842
CL.11247	-0.361158	0.408003	0.787784	688.561	301.539	224.997	365.419	320.292	402.949	229.408	275.21
CL.11248	-1.58067	0.062485	0.289122	161.82	184.675	108.269	36.7405	81.4777	26.5681	49.8144	6.47552
CL.11249	0.630849	0.526938	0.860948	36.327	72.1385	8.45853	17.8738	73.049	62.7302	15.7309	55.6895
CL.1125	5.15956	0.128203	NA	0	0	0	0	0	0	31.4617	0
CL.11250	0.16385	0.511471	0.854776	12463.5	6566.05	6952.06	7551.67	10708.7	11337.2	8118.44	7396.34
CL.11251	-0.504361	0.292597	0.688131	627.466	256.813	222.459	196.611	271.124	228.781	251.694	165.773
CL.11252	-0.185886	0.399049	0.781361	6292.82	4199.9	4208.96	4691.86	4861.27	4633.18	3451.61	4097.71
CL.11253	-2.5319	NA	NA	85.8637	0	0	0	0	14.76	0	0
CL.11254	-2.21739	0.00240409	0.0330657	345.106	103.879	86.277	89.3689	29.5006	54.6122	18.3527	31.0825
CL.11255	0.84952	0.077342	0.323981	178.332	75.0241	231.764	186.682	268.315	278.965	235.963	428.679
CL.11256	NA	NA	NA	0	0	0	0	0	0	0	0
CL.11257	-1.07318	0.00146024	0.0224187	14154.3	8598.91	7689.65	4314.53	3357.44	3541.67	6943.87	2678.27
CL.11258	0.206282	0.534929	0.865343	762.866	474.671	364.563	489.543	592.118	611.066	686.914	520.632
CL.11259	-1.62804	0.000365679	0.0072303	264.196	601.635	397.551	534.227	226.171	92.9883	159.93	102.961
CL.1126	5.27024	NA	NA	0	0	0	0	33.7149	0	0	0
CL.11260	-0.27017	0.159928	0.50209	4347.68	3759.86	4110	3510.21	3409.42	2971.94	3167.15	3491.6
CL.11261	3.21899	0.170933	0.520941	0	0	0	8.93689	36.5245	0	31.4617	16.8363
CL.11262	4.85602	NA	NA	0	0	0	0	25.2862	0	0	0
CL.11263	0.479712	0.231011	0.616661	208.054	328.952	473.678	493.515	597.035	302.581	566.311	635.248
CL.11264	-0.318904	0.352599	0.744401	561.417	591.536	610.706	991.001	379.293	699.626	469.304	660.503
CL.11265	0.174475	0.706859	0.936888	148.61	190.446	263.906	254.205	157.336	183.025	339.524	290.103
CL.11266	0.0681956	0.847109	0.971711	56663.5	15691.6	18838.8	46005.1	42117	50437.3	30053.8	21229.3
CL.11267	-0.487287	0.528082	0.861497	6.6049	288.554	277.44	162.85	178.408	110.7	165.174	71.2307
CL.11268	-3.92486	NA	NA	0	0	0	31.7756	0	0	0	1.94266
CL.11269	5.89386	NA	NA	0	0	0	0	51.9772	0	0	0
CL.1127	5.27024	NA	NA	0	0	0	0	33.7149	0	0	0
CL.11270	0.11577	0.703787	0.935814	9871.03	3464.09	3849.48	6811.89	7020.43	7930.57	6146.83	4900.03
CL.11271	-0.15934	0.385944	0.772556	5034.59	5872.08	4949.08	4778.25	4897.09	4675.98	4297.15	4603.45
CL.11272	-0.118675	0.54134	0.869899	3195.12	3754.09	3813.1	4017.63	3568.16	3331.34	3043.92	3669.68
CL.11273	4.89486	0.149169	NA	0	0	0	0	0	0	26.2181	0
CL.11274	5.27024	NA	NA	0	0	0	0	33.7149	0	0	0
CL.11275	5.07794	NA	NA	0	0	0	0	29.5006	0	0	0
CL.11276	5.03327	0.137899	NA	0	0	0	0	0	0	28.8399	0
CL.11277	-0.176917	0.803228	0.962774	95.7711	265.47	105.732	155.899	179.813	268.633	78.6543	23.3119
CL.11278	-0.774635	0.00668529	0.0708133	1119.53	1439.88	1055.62	1245.21	717.145	917.337	479.791	723.963
CL.11279	2.97012	NA	NA	0	0	0	6.95091	51.2748	0	3.93272	0
CL.1128	0.350947	0.509938	0.8542	56.1417	398.205	327.345	264.135	349.792	206.641	391.961	387.236
CL.11280	-0.115564	0.551008	0.874979	3857.26	4729.4	4029.64	3738.6	3693.89	3838.35	3396.56	4164.41
CL.11281	5.68466	NA	NA	0	0	0	0	44.9532	0	0	0
CL.11282	-1.98685	0.54141	NA	33.0245	0	0	7.9439	0	0	10.4872	0
CL.11283	-0.74964	0.660723	0.921642	95.7711	8.65662	18.6088	0	0	11.808	7.86543	53.0993
CL.11284	1.37608	0.119941	0.42691	36.327	24.5271	27.0673	17.8738	68.1322	92.9883	94.3852	18.779
CL.11285	5.41218	0.110413	NA	0	0	0	0	0	0.738002	36.7053	0
CL.11286	4.75681	NA	NA	0	0	0	0	0	23.6161	0	0
CL.11287	4.75681	NA	NA	0	0	0	0	0	23.6161	0	0
CL.11288	-1.25496	NA	NA	62.7466	0	0	0	2.80958	0	23.5963	0
CL.11289	3.03752	NA	NA	0	0	0	5.95792	0	0	49.8144	0
CL.1129	-1.69478	0.0417429	0.231896	406.202	57.7108	161.558	299.882	16.8575	42.8041	213.678	14.2461
CL.11290	5.49228	NA	NA	0	0	0	0	39.3341	0	0	0
CL.11291	5.74449	NA	NA	0	0	0	0	44.2508	0	2.62181	0
CL.11292	5.3675	0.113408	NA	0	0	0	0	0	2.21401	34.0835	0
CL.11293	5.43989	NA	NA	0	0	0	0	37.9293	0	0	0
CL.11294	5.8256	NA	NA	0	0	0	0	0	0	49.8144	0
CL.11295	0.665217	0.234493	0.62061	39.6294	274.126	211.463	182.71	377.888	203.689	225.476	316.653
CL.11296	20.8378	NA	NA	0	0	0	0	64.6203	0	0	0
CL.11297	-7.02075	0.0182228	0.139618	0	49.0542	28.759	0	0	0	0	0
CL.11298	-0.403671	0.0446067	0.241205	3328.87	3964.73	3150.8	3669.09	2303.85	2642.05	2873.5	2849.88
CL.11299	5.72899	NA	NA	0	0	0	0	46.358	0	0	0
CL.113	0.208681	0.618125	0.906029	356.665	506.412	476.215	148.948	415.115	373.429	449.641	481.131
CL.1130	-5.91508	0.0813529	NA	36.327	0	0	0	0	0	0	0
CL.11300	-0.00200507	0.993914	0.999333	4752.23	3569.41	3144.88	4774.28	5134.5	5170.44	2915.45	2994.28
CL.11301	0.371912	0.843242	0.971442	42.9319	0	16.9171	19.8597	53.382	0	49.8144	0
CL.11302	5.32903	NA	NA	0	0	0	0	35.1197	0	0	0
CL.11303	4.96573	0.143314	NA	0	0	0	0	0	0	27.529	0
CL.11304	5.20894	NA	NA	0	0	0	0	32.3101	0	0	0
CL.11305	-0.786262	0.800913	0.961882	0	37.512	0	0	0	7.38002	0	14.2461
CL.11306	-0.450737	0.762388	0.951756	85.8637	0	13.5336	17.8738	28.0958	1.476	44.5708	11.6559
CL.11307	-0.020537	0.968696	0.99628	264.196	95.2228	121.803	244.275	231.79	171.955	174.35	136.633
CL.11308	-0.80645	0.238318	0.625588	130.447	151.491	141.257	61.5652	25.2862	67.8962	108.805	75.7636
CL.11309	-3.9705	0.235527	NA	36.327	0	0	0	0	2.21401	0	0
CL.1131	5.43989	NA	NA	0	0	0	0	37.9293	0	0	0
CL.11310	5.43989	NA	NA	0	0	0	0	37.9293	0	0	0
CL.11311	-0.225442	0.516623	0.856514	1416.75	985.412	717.283	1169.74	982.65	1136.52	429.977	1115.08
CL.11312	-0.260767	0.21315	0.58981	2057.43	1780.38	1824.5	1799.29	1503.12	1622.13	1468.21	1632.48
CL.11313	-0.293273	0.160964	0.503601	6618.11	7704.39	6347.28	6998.57	6900.32	6137.23	5285.57	4254.42
CL.11314	-0.176264	0.932121	0.989124	0	8.65662	11.8419	45.6774	19.667	0	39.3272	0
CL.11315	5.54283	NA	NA	0	0	0	0	40.7389	0	0	0
CL.11316	0.708656	0.210813	0.58578	72.6539	161.59	209.772	107.243	96.9304	187.453	270.046	348.383
CL.11317	0.34084	0.864689	0.976067	0	0	35.5258	21.8457	0	13.284	15.7309	44.0335
CL.11318	5.78476	0.0878158	NA	0	0	0	0	39.3341	8.85603	0	0
CL.11319	1.48127	0.356114	0.746454	0	0	3.38341	51.6353	83.5849	16.236	44.5708	10.3608
CL.1132	1.3336	7,23620606407977e-06	0.000230938	564.719	1037.35	884.762	716.937	1930.88	1434.68	2915.45	1798.9
CL.11320	-0.176147	0.439755	0.8096	1287.96	1657.74	1538.61	1517.28	1337.36	1394.82	1147.04	1431.74
CL.11321	-6.7215	0.010663	0.0969106	42.9319	2.88554	1.69171	15.8878	0	0	0	0
CL.11322	0.549069	0.00524022	0.0586814	15833.6	23241.6	21392.5	18811.2	23729.7	29847.8	30169.2	32252.6
CL.11323	-0.549725	0.305401	0.701252	135.401	193.331	155.637	236.331	80.0729	193.357	89.1416	129.51
CL.11324	0.393761	0.143159	0.47311	757.913	867.105	789.181	1116.12	1438.5	962.355	1137.87	1100.84
CL.11325	5.72029	0.0914335	NA	0	0	0	0	34.4173	0	0	11.6559
CL.11326	1.1093	0.728825	0.941816	0	17.3132	0	0	26.691	0	10.4872	0
CL.11327	6.52273	0.0295868	0.18972	0	0	0	0	66.0251	0	14.42	0
CL.11328	2.33441	NA	NA	0	0	0	10.9229	55.4891	0	0	0
CL.11329	3.69003	0.278687	NA	0	0	0	0	11.2383	0	0	0
CL.1133	-0.080473	0.736347	0.943884	1367.21	1861.17	2352.32	1924.41	1753.18	1765.3	1951.94	1632.48
CL.11330	5.38314	NA	NA	0	0	0	0	0	0	36.7053	0
CL.11331	5.68466	NA	NA	0	0	0	0	44.9532	0	0	0
CL.11332	5.63891	NA	NA	0	0	0	0	43.5484	0	0	0
CL.11333	5.48316	NA	NA	0	0	0	0	0	0	39.3272	0
CL.11334	-0.418689	0.0184624	0.140833	6527.3	7524.05	7122.93	7481.17	5326.26	5709.19	5533.33	4870.24
CL.11335	5.63891	NA	NA	0	0	0	0	43.5484	0	0	0
CL.11336	5.32903	NA	NA	0	0	0	0	35.1197	0	0	0
CL.11337	-6.54541	NA	NA	56.1417	0	0	0	0	0	0	0
CL.11338	0.82253	0.240094	0.628192	257.591	115.422	133.645	17.8738	303.434	74.5382	346.079	202.036
CL.11339	2.67688	NA	NA	0	0	0	6.95091	44.9532	0	0	0
CL.1134	0.0467423	0.908447	0.982768	407.853	258.256	214.001	395.209	417.925	377.857	246.45	273.267
CL.11340	20.8038	NA	NA	0	0	0	0	63.2155	0	0	0
CL.11341	5.63891	NA	NA	0	0	0	0	43.5484	0	0	0
CL.11342	-6.45768	NA	NA	52.8392	0	0	0	0	0	0	0
CL.11343	5.63891	NA	NA	0	0	0	0	43.5484	0	0	0
CL.11344	5.03327	0.137899	NA	0	0	0	0	0	0	28.8399	0
CL.11345	-5.62413	0.097717	NA	29.7221	0	0	0	0	0	0	0
CL.11346	5.43989	NA	NA	0	0	0	0	37.9293	0	0	0
CL.11347	-2.27805	0.487664	NA	0	30.2982	0	0	0.702394	2.95201	2.62181	0
CL.11348	4.89486	0.149169	NA	0	0	0	0	0	0	26.2181	0
CL.11349	0.146104	0.50586	0.851545	2196.13	2214.65	2501.19	2638.37	3099.67	2929.87	2427.8	2112.31
CL.1135	5.20894	NA	NA	0	0	0	0	32.3101	0	0	0
CL.11350	0.109056	0.633217	0.911784	3079.54	4302.34	4946.55	3858.75	4212.96	4309.2	3489.63	5447.21
CL.11351	5.27024	NA	NA	0	0	0	0	33.7149	0	0	0
CL.11352	5.27568	0.119766	NA	0	0	0	0	0	0	34.0835	0
CL.11353	5.54283	NA	NA	0	0	0	0	40.7389	0	0	0
CL.11354	1.23524	NA	NA	0	14.4277	0	0	33.7149	0	0	0
CL.11355	0.988248	0.0559272	0.270923	184.937	173.132	189.471	272.079	518.367	609.59	95.6961	401.482
CL.11356	0.0909561	0.708819	0.937353	1747	3120.71	3484.91	3115	2978.85	3054.59	3022.95	3162
CL.11357	-0.232536	0.381311	0.769563	1875.79	1145.56	1424.42	1435.86	1517.87	1414.75	1031.68	1039.32
CL.11358	0.292736	0.3036	0.699468	1396.94	882.975	740.121	1151.87	1243.24	1601.46	1130	1131.92
CL.11359	1.94926	0.397994	0.780807	0	0	6.76682	7.9439	0	14.76	20.9745	22.0168
CL.1136	5.03327	0.137899	NA	0	0	0	0	0	0	28.8399	0
CL.11360	0.182949	0.342507	0.737255	4699.39	4432.19	4792.6	5202.26	4833.17	4878.93	6420.81	5583.84
CL.11361	-0.0817854	0.676169	0.927545	3599.67	3843.54	3938.29	4373.12	4170.11	3614.73	3922.23	3182.07
CL.11362	-0.194673	0.301808	0.697535	5006.52	6524.21	6670.4	5616.34	5454.09	5225.06	5111.22	5022.41
CL.11363	5.32903	NA	NA	0	0	0	0	35.1197	0	0	0
CL.11364	5.00769	NA	NA	0	0	0	0	28.0958	0	0	0
CL.11365	5.63891	NA	NA	0	0	0	0	43.5484	0	0	0
CL.11366	4.89486	0.149169	NA	0	0	0	0	0	0	26.2181	0
CL.11367	5.27568	0.119766	NA	0	0	0	0	0	0	34.0835	0
CL.11368	-3.48231	0.0672951	0.30081	33.0245	0	21.9922	79.439	0	1.476	0	10.3608
CL.11369	-0.885221	0.535759	0.86607	69.3515	63.4819	11.8419	7.9439	54.7868	22.1401	5.24362	0
CL.1137	21.0028	NA	NA	0	0	0	0	73.049	0	0	0
CL.11370	5.20894	NA	NA	0	0	0	0	32.3101	0	0	0
CL.11371	0.865451	0.695995	0.933878	0	0	4.22926	28.7966	0	5.90402	36.7053	18.1315
CL.11372	0.469095	0.0186844	0.142007	5186.5	4694.77	4915.25	4973.87	6319.44	5421.36	8153.83	7474.69
CL.11373	5.49228	NA	NA	0	0	0	0	39.3341	0	0	0
CL.11374	0.356508	0.177952	0.533294	1065.04	1168.64	1013.33	1215.42	1887.33	1411.8	1413.16	1001.12
CL.11375	21.0784	NA	NA	0	0	0	0	77.2634	0	0	0
CL.11376	-0.41199	0.258119	0.652023	8685.45	2689.32	2219.52	3501.27	4104.79	3958.64	2545.78	2235.35
CL.11377	0.726203	0.000111259	0.0026378	2661.78	2718.18	2863.21	2390.12	4086.53	4398.49	4677.31	4429.25
CL.11378	0.758402	0.566854	0.883101	23.1172	28.8554	27.0673	0	36.5245	26.5681	58.9907	11.6559
CL.11379	0.155179	0.540783	0.869589	970.921	770.439	967.656	1203.5	1042.35	1071.58	1089.36	1155.23
CL.1138	5.74731	NA	NA	0	0	0	0	0	0	47.1926	0
CL.11380	-0.135566	0.540573	0.869475	3318.96	2510.42	2151.85	2522.19	2263.11	2709.21	2207.56	2377.16
CL.11381	-0.000323253	0.998873	0.999633	10089	6416	6084.22	6962.83	5867.1	8120.98	8769.96	6785.7
CL.11382	-1.31061	0.0225159	0.160157	1271.44	559.795	203.005	158.878	351.197	197.785	146.821	186.495
CL.11383	-0.65901	0.00458719	0.0539487	2719.57	3093.3	3709.91	2815.12	1831.14	1485.6	2131.53	2367.45
CL.11384	-1.13497	0.00237189	0.0326809	6273.01	3471.31	2096.87	1349.47	1280.46	1172.69	2034.53	1517.86
CL.11385	5.00769	NA	NA	0	0	0	0	28.0958	0	0	0
CL.11386	0.155159	0.713097	0.938368	175.03	357.807	502.437	444.858	430.568	253.873	524.362	442.925
CL.11387	-0.106712	0.729289	0.941816	6804.7	6310.68	11626.2	7500.03	4228.41	4866.39	10883.1	9970.36
CL.11388	0.65192	0.0246432	0.169166	455.738	686.759	561.646	486.564	877.993	776.378	1034.3	755.046
CL.11389	0.367202	0.246949	0.637091	538.3	1587.05	1341.52	1029.73	1392.15	1327.67	1558.67	1524.34
CL.1139	-7.1006	0.00693087	0.0726921	62.7466	0	6.76682	12.9088	0	0	0	0
CL.11390	-0.809022	0.029007	0.18727	399.597	1128.25	1055.62	877.801	443.913	399.997	435.221	696.766
CL.11391	-0.642726	0.843946	NA	6.6049	14.4277	0	0	13.3455	0	0	0
CL.11392	6.27954	NA	NA	0	0	0	0	0	0	68.1671	0
CL.11393	5.15956	0.128203	NA	0	0	0	0	0	0	31.4617	0
CL.11394	5.39971	NA	NA	0	0	0	0	0	36.9001	0	0
CL.11395	5.38553	NA	NA	0	0	0	0	36.5245	0	0	0
CL.11396	4.89486	0.149169	NA	0	0	0	0	0	0	26.2181	0
CL.11397	5.00769	NA	NA	0	0	0	0	28.0958	0	0	0
CL.11398	5.38314	NA	NA	0	0	0	0	0	0	36.7053	0
CL.11399	5.72899	NA	NA	0	0	0	0	46.358	0	0	0
CL.114	-0.262104	0.654109	0.919193	356.665	144.277	136.182	113.201	92.716	126.936	280.534	125.625
CL.1140	1.4127	0.528383	0.861682	0	5.77108	32.1424	0	0	0	60.3016	41.4433
CL.11400	5.66452	NA	NA	0	0	0	0	0	0	44.5708	0
CL.11401	2.38728	NA	NA	0	0	8.45853	0	44.9532	0	0	0
CL.11402	1.19758	NA	NA	0	0	16.9171	0	0	0	39.3272	0
CL.11403	5.63891	NA	NA	0	0	0	0	43.5484	0	0	0
CL.11404	5.38314	NA	NA	0	0	0	0	0	0	36.7053	0
CL.11405	5.38553	NA	NA	0	0	0	0	36.5245	0	0	0
CL.11406	-1.5118	0.151327	0.487277	12268.6	2547.93	1876.1	305.84	2055.21	791.138	2682.11	432.565
CL.11407	4.85602	NA	NA	0	0	0	0	25.2862	0	0	0
CL.11408	5.74731	NA	NA	0	0	0	0	0	0	47.1926	0
CL.11409	-1.32748	0.0337093	0.20523	1403.54	259.699	274.056	131.074	330.125	107.01	245.139	141.166
CL.1141	5.57669	NA	NA	0	0	0	0	0	0	41.949	0
CL.11410	0.116385	0.46827	0.830526	20610.6	19806.4	19692.3	19061.4	21554.4	20688.4	21227.5	22350.3
CL.11411	2.43628	NA	NA	0	8.65662	0	0	46.358	0	0	0
CL.11412	0.813862	0.00043018	0.00826262	4889.28	3202.95	3233.7	3025.63	6920.69	7405.11	5895.14	5000.4
CL.11413	0.939771	0.00431875	0.0514681	346.757	867.105	693.599	910.569	1259.39	1590.39	1029.06	1529.52
CL.11414	0.899365	0.381531	0.76959	0	25.9699	135.336	87.3829	21.0718	111.438	170.418	163.183
CL.11415	0.187646	0.498999	0.848207	1410.15	848.349	1199.42	1346.49	1634.47	1636.89	1082.81	1116.38
CL.11416	2.56095	0.0744131	0.317131	0	0	18.6088	20.8527	149.61	5.90402	39.3272	41.4433
CL.11417	5.15956	0.128203	NA	0	0	0	0	0	0	31.4617	0
CL.11418	5.27024	NA	NA	0	0	0	0	33.7149	0	0	0
CL.11419	1.85881	NA	NA	0	7.21385	0	0	0	25.8301	0	0
CL.1142	0.321068	0.264411	0.659682	531.695	779.096	593.789	697.077	910.303	870.843	841.601	628.125
CL.11420	6.40973	0.0186774	0.142007	0	0	0	0	36.5245	0	32.7726	5.18042
CL.11421	-6.43513	NA	NA	0	51.9397	0	0	0	0	0	0
CL.11422	5.54283	NA	NA	0	0	0	0	40.7389	0	0	0
CL.11423	0.625005	0.471956	0.832067	16.5123	37.512	55.8263	39.7195	97.6328	41.3281	60.3016	32.3776
CL.11424	5.51007	0.104071	NA	0	0	0	0	28.0958	0	11.7981	0
CL.11425	0.12134	0.586921	0.892396	1509.22	1200.38	1267.93	1303.79	1547.37	1385.23	1427.58	1383.17
CL.11426	-1.10698	1,74432867853389e-07	8,39533710407535e-06	3536.93	2853.8	2755.79	2685.04	1427.27	1476	1324.01	1264.02
CL.11427	-3.33734	0.00758525	0.0771105	175.03	63.4819	54.1346	104.264	0	16.236	23.5963	0
CL.11428	-0.0546375	0.84396	0.971442	13201.5	6088.49	5509.89	7040.28	8850.17	8634.63	7466.92	5700.4
CL.11429	-1.3446	0.679632	NA	36.327	0	0	0	0	0	14.42	0
CL.1143	0.379516	0.316723	0.712664	208.054	343.379	274.902	418.048	307.649	435.421	429.977	447.458
CL.11430	5.93561	NA	NA	0	0	0	0	0	0	53.7471	0
CL.11431	5.15956	0.128203	NA	0	0	0	0	0	0	31.4617	0
CL.11432	20.7475	NA	NA	0	0	0	0	60.4059	0	0	0
CL.11433	4.77374	NA	NA	0	0	0	0	23.8814	0	0	0
CL.11434	0.00125132	0.99675	0.999466	1997.98	1033.02	1031.09	1725.81	2018.68	1225.82	1436.75	1109.9
CL.11435	0.326269	0.134131	0.45526	16816.1	13833.3	20782.6	14100.4	19411.4	15356.4	23460	23938.7
CL.11436	-1.09953	0.655496	0.91935	6.6049	46.1687	0	13.9018	0	30.9961	0	0
CL.11437	3.0302	0.02875	0.186477	0	11.5422	15.2254	0	49.1676	29.5201	112.738	29.7874
CL.11438	1.36229	0.166147	0.513342	0	103.879	11.8419	87.3829	85.6921	138.744	192.703	105.551
CL.11439	5.64125	NA	NA	0	0	0	0	42.1437	1.476	0	0
CL.1144	-2.70405	0.416066	NA	0	21.6416	0	0	0	0	0	3.23776
CL.11440	5.43989	NA	NA	0	0	0	0	37.9293	0	0	0
CL.11441	5.07794	NA	NA	0	0	0	0	29.5006	0	0	0
CL.11442	1.30882	0.398849	0.781287	0	40.3976	23.6839	0	80.0729	16.236	7.86543	54.3944
CL.11443	1.6952	0.00353889	0.0442737	62.7466	28.8554	145.487	67.5231	203.694	298.153	196.636	292.693
CL.11444	21.1347	NA	NA	0	0	0	0	80.7753	0	0	0
CL.11445	0.202363	0.573778	0.88594	270.801	317.409	395.013	520.325	409.496	507.008	450.951	365.219
CL.11446	-6.31989	0.0623819	NA	42.9319	0	5.07512	0	0	0	0	0
CL.11447	-6.91834	NA	NA	72.6539	0	0	0	0	0	0	0
CL.11448	-0.00862754	0.96426	0.995454	6145.86	7773.65	7961.17	7532.8	6077.12	7387.4	7748.76	8028.35
CL.11449	5.27568	0.119766	NA	0	0	0	0	0	0	34.0835	0
CL.1145	-0.16695	0.924123	0.987273	0	31.7409	32.9883	25.8177	0	1.476	68.1671	11.6559
CL.11450	0.147659	0.543893	0.871501	6347.31	3080.31	4047.41	4951.03	5124.67	5800.7	5142.68	4341.84
CL.11451	-5.91508	0.0813529	NA	36.327	0	0	0	0	0	0	0
CL.11452	5.49228	NA	NA	0	0	0	0	39.3341	0	0	0
CL.11453	5.68466	NA	NA	0	0	0	0	44.9532	0	0	0
CL.11454	5.81378	NA	NA	0	0	0	0	49.1676	0	0	0
CL.11455	5.77201	NA	NA	0	0	0	0	47.7628	0	0	0
CL.11456	4.89486	0.149169	NA	0	0	0	0	0	0	26.2181	0
CL.11457	-6.62811	NA	NA	59.4441	0	0	0	0	0	0	0
CL.11458	4.02742	0.236422	NA	0	0	0	0	0	0	9.17634	5.18042
CL.11459	-2.65334	0.170853	0.520856	85.8637	8.65662	5.07512	0	1.40479	10.332	0	3.88531
CL.1146	0.160076	0.464245	0.82687	1742.04	1910.23	2118.02	1846.96	1757.39	2311.42	2018.79	2424.43
CL.11460	0.176197	0.509732	0.853992	807.449	634.819	701.212	685.161	788.789	692.984	912.39	802.317
CL.11461	0.131693	0.528101	0.861497	6555.37	5230.04	4213.19	5239.99	5535.57	6197.74	6529.62	5002.99
CL.11462	-0.883929	0.0173389	0.13493	1766.81	3034.15	2518.95	2243.16	1804.45	1560.87	377.541	1436.27
CL.11463	-0.659734	0.74848	0.947284	0	0	45.6761	67.5231	0	35.4241	0	36.2629
CL.11464	-0.409699	0.0428834	0.235305	25480.1	23535.9	19107	15682.2	15765.2	14398.4	17159.8	15760.8
CL.11465	-0.0084593	0.960939	0.994634	12199.3	11223.3	11417.3	12454	11399.2	12791.1	10467.6	12357.2
CL.11466	0.926503	0.16529	0.511743	72.6539	66.3674	118.419	99.2987	276.743	73.8002	272.668	56.9846
CL.11467	-6.54541	NA	NA	56.1417	0	0	0	0	0	0	0
CL.11468	-3.07655	0.0684189	0.30305	66.049	69.253	0.845853	23.8317	0	4.42801	0	14.2461
CL.11469	-0.296871	0.230634	0.616066	1489.41	1249.44	1341.52	1269.04	872.374	984.495	1203.41	1294.46
CL.1147	-0.728983	0.0352039	0.210577	6793.14	3065.89	2458.89	1608.64	2088.92	1942.42	2364.87	2003.53
CL.11470	-0.112606	0.571791	0.885036	4851.3	5960.08	7393.6	5860.61	5098.68	5825.79	5761.43	5577.36
CL.11471	5.85437	NA	NA	0	0	0	0	50.5724	0	0	0
CL.11472	-0.155035	0.386613	0.773301	28389.5	28791.9	22859.2	22712.6	21012.1	22920.9	24351.4	23996.3
CL.11473	5.45341	0.107706	NA	0	0	0	0	16.1551	22.1401	0	0
CL.11474	NA	NA	NA	0	0	0	0	0	0	0	0
CL.11475	-0.678943	0.0211511	0.153853	914.779	1598.59	1390.58	1284.93	561.915	742.43	947.785	990.754
CL.11476	4.65864	0.17002	NA	0	0	0	0	0	0	22.2854	0
CL.11477	5.07794	NA	NA	0	0	0	0	29.5006	0	0	0
CL.11478	-0.436308	0.88303	0.979288	0	0	0	39.7195	0	17.7121	0	11.6559
CL.11479	5.07794	NA	NA	0	0	0	0	29.5006	0	0	0
CL.1148	5.38314	NA	NA	0	0	0	0	0	0	36.7053	0
CL.11480	-2.85419	0.000236384	0.00506814	1165.77	251.042	125.186	95.3268	37.2269	29.5201	144.2	16.8363
CL.11481	0.498101	0.0499104	0.25638	1438.22	2863.9	2774.4	2155.78	3079.3	2833.19	3451.61	3679.39
CL.11482	0.0646671	0.768748	0.953103	3117.51	2312.76	2160.31	3020.67	2657.86	3052.38	2904.97	2481.42
CL.11483	1.57191	0.510829	0.854521	0	25.9699	0	0	42.1437	0	28.8399	5.82797
CL.11484	-0.0503843	0.850035	0.972569	8000.19	3748.32	3985.66	6426.61	5972.46	5831.69	5514.98	4078.93
CL.11485	-0.149149	0.578462	0.887648	1162.46	1790.48	2345.55	1684.11	1726.49	1291.5	1466.9	1814.44
CL.11486	-0.60307	NA	NA	0	37.512	0	0	24.5838	0	0	0
CL.11487	0.255076	0.630218	0.910903	132.098	118.307	262.214	131.074	102.55	203.689	272.668	191.675
CL.11488	0.111711	0.597421	0.897639	3705.35	3234.69	2366.7	3326.51	3583.62	3403.67	3405.73	3253.3
CL.11489	0.0425563	0.853537	0.973708	1443.17	1875.6	1854.11	2378.2	1923.86	1850.91	1974.22	2031.37
CL.1149	-5.62413	0.097717	NA	29.7221	0	0	0	0	0	0	0
CL.11490	-0.0348746	0.878217	0.977621	1852.68	1933.31	2190.76	1844.97	1436.4	2101.09	1987.33	2111.67
CL.11491	0.999521	0.0145941	0.120652	432.621	178.904	155.637	247.254	507.129	516.602	562.378	437.745
CL.11492	1.2107	2,85969499397087e-06	0.00010101	1083.2	600.192	770.572	851.983	1659.76	2064.93	1882.46	2041.08
CL.11493	6.03329	0.0685763	0.303179	0	0	0	0	36.5245	0	0	20.7217
CL.11494	-0.199524	0.492619	0.845022	761.215	882.975	688.524	1207.47	863.243	673.796	700.023	845.703
CL.11495	0.0625728	0.774181	0.95452	4220.53	3360.21	2924.96	3844.85	4434.92	4050.16	3277.26	3220.28
CL.11496	-0.26964	0.71206	0.938368	317.035	14.4277	104.886	244.275	127.836	219.925	104.872	111.379
CL.11497	4.85602	NA	NA	0	0	0	0	25.2862	0	0	0
CL.11498	2.19927	0.0491083	0.254254	6.6049	25.9699	3.38341	31.7756	7.02394	48.7081	207.123	49.2139
CL.11499	-0.385809	0.75032	0.947588	135.401	31.7409	49.0595	0	36.5245	29.5201	86.5197	12.951
CL.115	5.63891	NA	NA	0	0	0	0	43.5484	0	0	0
CL.1150	0.285885	0.543467	0.871069	700.12	178.904	439.843	349.532	639.179	780.806	254.316	357.449
CL.11500	-0.240976	0.524677	0.859695	234.474	308.753	348.491	291.938	262.695	231.733	267.425	240.889
CL.11501	0.0881454	0.967609	0.995778	26.4196	0	21.9922	0	17.5599	0	28.8399	5.18042
CL.11502	5.51188	NA	NA	0	0	0	0	37.9293	0	0	1.94266
CL.11503	5.38553	NA	NA	0	0	0	0	36.5245	0	0	0
CL.11504	5.68466	NA	NA	0	0	0	0	44.9532	0	0	0
CL.11505	1.57259	NA	NA	0	0	0	17.8738	53.382	0	0	0
CL.11506	6.04697	0.067633	0.301427	0	0	0	0	43.5484	0	0	14.2461
CL.11507	-0.106646	0.751405	0.947643	678.654	923.373	707.133	818.222	966.495	828.039	369.675	737.562
CL.11508	0.165498	0.55183	0.8753	769.471	1239.34	1603.74	1363.37	1568.45	1469.36	1182.44	1363.74
CL.11509	0.111126	0.809015	0.96322	227.869	126.964	244.451	343.574	202.29	309.223	311.995	196.856
CL.1151	5.23992	NA	NA	0	0	0	0	33.0125	0	0	0
CL.11510	0.960001	0.063142	0.290926	72.6539	190.446	228.38	105.257	212.123	216.973	444.397	290.751
CL.11511	5.89678	0.0818072	0.331871	0	0	0	0	35.1197	0	17.0418	0
CL.11512	1.20886	0.688465	0.931467	0	0	19.4546	0	37.9293	7.38002	0	0
CL.11513	0.468547	0.0324019	0.200653	3091.09	2826.39	2348.09	2899.52	4383.64	3825.8	4335.16	2903.62
CL.11514	0.576643	0.736485	0.943884	13.2098	17.3132	1.69171	11.9158	16.1551	0	39.3272	10.3608
CL.11515	0.726645	0.278538	0.674342	155.215	51.9397	131.953	50.6424	254.267	156.456	183.527	50.509
CL.11516	5.00769	NA	NA	0	0	0	0	28.0958	0	0	0
CL.11517	0.176097	0.371829	0.760754	4171	5284.87	5052.28	4285.73	4464.42	5359.37	5930.54	5482.17
CL.11518	0.0548089	0.791198	0.958948	2334.83	2488.78	2934.26	2856.82	3211.35	2628.76	2511.69	2675.68
CL.11519	-0.480458	0.0802498	0.328906	14094.9	6633.86	5619.85	6660.96	6696.63	5498.12	5935.78	5524.91
CL.1152	0.075007	0.715504	0.938759	2526.38	3119.27	3423.17	3135.85	2871.39	2976.36	3507.98	3504.55
CL.11520	5.8256	NA	NA	0	0	0	0	0	0	49.8144	0
CL.11521	-1.42518	3,24539637074621e-16	5,78068892020095e-14	23629	27154.4	24358.9	24463.2	10107.5	7937.95	9308.74	9735.94
CL.11522	-0.859696	0.755008	NA	0	25.9699	1.69171	3.97195	0	14.76	2.62181	0
CL.11523	0.145311	0.776806	0.95579	92.4686	328.952	424.618	470.676	167.17	385.237	406.381	499.91
CL.11524	-0.221881	0.73873	0.944633	138.703	50.497	87.9687	123.13	112.383	47.2321	115.36	68.6405
CL.11525	-3.9151	0.000683968	0.0122667	211.357	577.108	850.928	404.146	0	35.4241	70.7889	29.7874
CL.11526	0.597813	0.178639	0.534431	142.005	328.952	581.947	427.978	532.415	370.477	849.467	494.73
CL.11527	5.14493	NA	NA	0	0	0	0	30.9053	0	0	0
CL.11528	5.07794	NA	NA	0	0	0	0	29.5006	0	0	0
CL.11529	-0.148239	0.945751	0.991244	9.90735	0	32.1424	8.93689	23.179	22.8781	0	0
CL.1153	0.0648894	0.765112	0.952394	2009.54	3047.13	2539.25	2296.78	2676.82	2481.16	2397.65	2791.6
CL.11530	-0.252631	0.671548	0.926457	82.5613	259.699	87.9687	187.675	110.978	194.833	86.5197	125.625
CL.11531	-0.690552	0.294382	0.689816	191.542	103.879	331.574	96.3198	169.979	159.408	34.0835	84.1817
CL.11532	-0.607009	0.185464	0.546378	620.861	334.723	330.728	297.896	396.853	136.53	318.55	187.79
CL.11533	5.33481	NA	NA	0	0	0	0	32.3101	2.95201	0	0
CL.11534	5.15956	0.128203	NA	0	0	0	0	0	0	31.4617	0
CL.11535	-0.605076	0.106163	0.395573	848.73	543.924	397.551	609.694	574.559	391.141	280.534	328.956
CL.11536	-0.235134	0.309551	0.705606	21769.8	11465.7	12627.7	15402.2	14128	14563.7	12628	10728.6
CL.11537	0.0899394	0.872372	0.97644	254.289	190.446	429.693	283.994	66.0251	304.057	595.151	270.677
CL.11538	-6.15709	0.0695146	NA	42.9319	0	0	0	0	0	0	0
CL.11539	6.08853	0.0374795	0.218332	0	0	0	0	12.6431	10.332	36.7053	0
CL.1154	4.89486	0.149169	NA	0	0	0	0	0	0	26.2181	0
CL.11540	-8.14219	0.000847636	0.0145629	155.215	14.4277	0	0	0	0	0	0
CL.11541	-0.382393	0.227649	0.612076	652.234	923.373	688.524	546.143	595.63	456.085	668.562	436.45
CL.11542	-0.510229	0.118358	0.423114	1112.93	999.84	1128.37	694.098	410.198	639.11	765.569	948.016
CL.11543	0.266329	0.196663	0.563107	2493.35	2442.61	2627.22	1928.38	2926.17	2927.65	2958.71	2603.16
CL.11544	0.507901	0.00433492	0.0515638	4616.83	5045.37	4960.08	4909.33	6914.37	6213.24	7039.56	7607.44
CL.11545	-0.173151	0.413253	0.792162	2006.24	2513.31	2733.8	2600.63	2445.03	2108.47	2046.32	2141.45
CL.11546	0.367332	0.0895885	0.353779	1342.45	1786.15	1550.45	1674.18	2008.15	2234.67	1902.12	2050.8
CL.11547	-0.128734	0.65013	0.917621	756.261	760.34	713.9	661.33	532.415	767.522	768.191	577.616
CL.11548	0.474595	0.687812	0.931467	0	11.5422	60.9014	72.4881	30.9053	95.9403	28.8399	46.6237
CL.11549	4.89545	NA	NA	0	0	0	0	25.9886	0	0	0
CL.1155	6.0418	NA	NA	0	0	0	0	57.5963	0	0	0
CL.11550	6.81752	NA	NA	0	0	0	0	92.716	5.90402	0	0
CL.11551	0.0703683	0.757775	0.95042	6393.55	3918.56	4316.39	5945.01	5928.21	5847.93	5539.89	4284.85
CL.11552	-0.690805	0.0300584	0.19174	729.842	640.59	676.682	740.769	299.22	565.31	390.65	471.418
CL.11553	-0.623793	0.833473	0.969447	0	37.512	0	5.95792	28.0958	0	0	0
CL.11554	0.153215	0.452432	0.81967	2331.53	2194.45	2527.41	2087.26	2285.59	2426.55	2615.26	2838.22
CL.11555	6.33801	0.0421771	0.233458	0	0	0	0	0	13.284	57.6798	0
CL.11556	-0.773947	0.725928	0.941344	0	23.0843	6.76682	29.7896	30.9053	0	0	3.88531
CL.11557	-0.159898	NA	NA	36.327	0	0	0	32.3101	0	0	0
CL.11558	4.93385	NA	NA	0	0	0	0	26.691	0	0	0
CL.11559	-0.105352	0.695426	0.933878	1106.32	1529.34	1891.33	1225.35	1081.69	1189.66	1491.81	1587.15
CL.1156	-0.200519	0.834027	0.969533	52.8392	161.59	83.7394	25.8177	8.42873	87.0843	170.418	16.8363
CL.11560	-0.907977	0.266415	0.66174	247.684	187.56	38.9092	21.8457	42.846	67.1582	106.183	47.9188
CL.11561	5.38553	NA	NA	0	0	0	0	36.5245	0	0	0
CL.11562	0.370826	0.280654	0.676401	310.43	340.494	531.196	435.921	560.511	553.502	388.028	591.862
CL.11563	-0.80942	0.578112	0.887438	0	49.0542	81.2019	39.7195	33.7149	13.284	0	49.8615
CL.11564	0.135107	0.927281	0.987777	16.5123	0	55.8263	69.5091	0	32.4721	94.3852	29.7874
CL.11565	-0.867324	0.192654	0.557317	551.509	282.783	263.06	103.271	33.7149	126.936	380.163	118.502
CL.11566	-0.152432	0.543223	0.870895	2542.89	3609.81	3635.48	2496.37	1996.2	2646.48	2802.72	3608.16
CL.11567	0.239734	0.749378	0.947579	92.4686	49.0542	54.1346	53.6213	43.5484	138.006	49.8144	62.165
CL.11568	-0.74571	0.186312	0.547538	7181.18	1615.9	1708.62	2164.71	2702.11	1769.73	1721.22	1361.8
CL.11569	20.7475	NA	NA	0	0	0	0	60.4059	0	0	0
CL.1157	1.34822	NA	NA	0	0	15.2254	0	0	0	39.3272	0
CL.11570	-0.575054	0.0425496	0.234586	995.689	1021.48	877.149	711.972	561.213	580.808	752.46	527.107
CL.11571	-0.260375	0.152477	0.48992	10257.4	8521	8512.66	9420.47	7441.16	8773.37	7116.9	7315.39
CL.11572	5.26936	NA	NA	0	0	0	0	0	0	0	33.6727
CL.11573	-0.101042	0.645173	0.916159	1578.57	1936.2	2226.28	1996.9	1732.81	1977.85	1814.29	1692.7
CL.11574	-0.464847	0.185085	0.545799	3883.68	1223.47	1483.63	2019.74	1784.08	1590.39	1919.17	944.131
CL.11575	0.0917516	0.766945	0.952433	591.139	1024.37	1006.56	1029.73	632.155	1059.03	992.355	1210.27
CL.11576	-0.581621	0.0669464	0.299842	894.964	1298.49	1410.88	1284.93	723.466	470.845	958.272	1116.38
CL.11577	5.43989	NA	NA	0	0	0	0	37.9293	0	0	0
CL.11578	0.0418445	0.912096	0.983134	462.343	339.051	559.109	415.069	733.3	383.023	377.541	334.137
CL.11579	-0.0766541	0.657393	0.920009	7050.73	8391.15	7345.39	7523.86	6945.27	7213.23	7244.06	7340
CL.1158	0.0748255	0.693554	0.933257	12156.3	8825.43	9702.78	9230.81	9754.85	11710.6	10841.2	9731.41
CL.11580	-0.320327	0.428598	0.801577	264.196	672.331	351.875	510.395	254.267	323.245	471.926	392.416
CL.11581	5.48159	0.105885	NA	0	0	0	0	0	0	31.4617	7.77062
CL.11582	1.4045	0.465287	0.827359	0	23.0843	16.9171	0	70.9418	20.6641	0	14.2461
CL.11583	-0.482729	0.344465	0.73889	178.332	265.47	393.322	133.06	143.288	224.353	112.738	213.692
CL.11584	-1.71212	1,42827459911531e-07	7,03670038902199e-06	4395.56	10887.1	10636.6	5626.27	3006.25	3303.3	1394.8	1921.93
CL.11585	0.549871	0.816805	0.965588	0	25.9699	16.9171	0	0	14.76	0	47.9188
CL.11586	-0.098218	0.719477	0.939762	726.539	1121.03	1071.7	1266.06	1095.74	933.573	835.047	1046.44
CL.11587	0.0551025	0.848722	0.971993	667.095	1015.71	1045.47	772.544	781.062	752.024	1143.11	964.205
CL.11588	-3.27185	0.058763	0.279785	75.9564	17.3132	15.2254	11.9158	0	10.332	0	1.94266
CL.11589	0.255583	0.273691	0.669516	25678.2	13888.1	17885.6	14308.9	24470.7	19638.2	24002.7	17555.1
CL.1159	0.694967	0.0807846	0.330173	297.221	551.138	346.8	557.066	925.756	901.839	317.239	690.29
CL.11590	0.131856	0.691416	0.933015	376.479	575.665	837.394	641.47	685.537	512.174	757.703	712.307
CL.11591	0.612512	0.0160287	0.128427	1013.85	943.572	1236.64	1181.65	1220.76	1788.92	2031.9	1653.85
CL.11592	5.81378	NA	NA	0	0	0	0	49.1676	0	0	0
CL.11593	5.32263	0.116481	NA	0	0	0	0	6.32155	0	28.8399	0
CL.11594	0.522931	0.7927	0.959636	29.7221	0	30.4507	0	0	4.42801	55.058	27.1972
CL.11595	5.47965	0.10601	NA	0	0	0	0	0	10.332	28.8399	0
CL.11596	-5.91508	0.0813529	NA	36.327	0	0	0	0	0	0	0
CL.11597	6.04043	NA	NA	0	0	0	0	56.8939	0	0	0.647552
CL.11598	-0.313084	0.320011	0.715906	848.73	1079.19	1071.7	755.663	439.699	838.371	785.232	959.672
CL.11599	5.07794	NA	NA	0	0	0	0	29.5006	0	0	0
CL.116	-3.48427	NA	NA	85.8637	0	0	0	0	0	7.86543	0
CL.1160	5.27024	NA	NA	0	0	0	0	33.7149	0	0	0
CL.11600	-6.26492	NA	NA	0	46.1687	0	0	0	0	0	0
CL.11601	5.63891	NA	NA	0	0	0	0	43.5484	0	0	0
CL.11602	-0.071654	0.753196	0.948149	2206.04	3422.25	3248.92	2568.86	2589.73	2321.02	2915.45	3067.45
CL.11603	5.59167	NA	NA	0	0	0	0	42.1437	0	0	0
CL.11604	5.15956	0.128203	NA	0	0	0	0	0	0	31.4617	0
CL.11605	4.17412	NA	NA	0	0	0.845853	0	25.9886	0	0	0
CL.11606	-6.07191	NA	NA	0	40.3976	0	0	0	0	0	0
CL.11607	0.162291	0.810233	0.963391	267.499	116.864	52.4429	108.236	257.076	83.3943	60.3016	206.569
CL.11608	-6.50459	0.0518833	0.261045	0	0	30.4507	23.8317	0	0	0	0
CL.11609	5.32903	NA	NA	0	0	0	0	35.1197	0	0	0
CL.1161	6.05233	0.0678763	0.301866	0	0	0	0	26.691	0	31.4617	0
CL.11610	5.68466	NA	NA	0	0	0	0	44.9532	0	0	0
CL.11611	5.12964	0.13045	NA	0	0	0	0	26.691	0	0	3.88531
CL.11612	5.27024	NA	NA	0	0	0	0	33.7149	0	0	0
CL.11613	5.77201	NA	NA	0	0	0	0	47.7628	0	0	0
CL.11614	1.13949	0.308223	0.705089	52.8392	11.5422	26.2214	25.8177	167.17	64.9442	20.9745	2.59021
CL.11615	0.767539	0.366376	0.756043	92.4686	23.0843	103.194	57.5933	12.6431	118.08	262.181	79.0013
CL.11616	5.27568	0.119766	NA	0	0	0	0	0	0	34.0835	0
CL.11617	5.85437	NA	NA	0	0	0	0	50.5724	0	0	0
CL.11618	-1.77047	0.358182	0.748638	42.9319	51.9397	17.7629	0	0	19.1881	0	13.5986
CL.11619	-0.329705	0.196727	0.563107	2316.67	1728.44	2486.81	2089.25	1396.36	1411.06	1685.82	2366.8
CL.1162	0.218964	0.261536	0.655758	2648.57	2876.88	2861.52	2640.35	3471.23	2805.15	3450.3	3109.54
CL.11620	-0.665456	0.718295	0.939441	36.327	0	76.9726	11.9158	0	67.8962	0	11.0084
CL.11621	-0.225926	0.303994	0.699522	2840.11	2651.81	2407.3	2762.49	2528.62	2132.83	1774.97	2675.68
CL.11622	-0.417006	0.104562	0.391745	1307.77	2083.36	1854.96	2256.07	1248.86	1664.2	1187.68	1518.51
CL.11623	5.41296	NA	NA	0	0	0	0	37.2269	0	0	0
CL.11624	1.1405	NA	NA	0	17.3132	0	0	37.9293	0	0	0
CL.11625	5.03327	0.137899	NA	0	0	0	0	0	0	28.8399	0
CL.11626	-0.540012	0.132749	0.452631	534.997	1334.56	1197.73	1227.33	809.861	661.25	437.842	1043.85
CL.11627	NA	NA	NA	0	0	0	0	0	0	0	0
CL.11628	-0.936408	0.191644	0.555967	310.43	99.5512	130.261	63.5512	64.6203	82.6563	26.2181	140.519
CL.11629	-2.06271	0.175591	0.529339	115.586	51.9397	48.2136	0	0	19.1881	28.8399	3.88531
CL.1163	2.71328	0.296658	0.69205	0	0	9.30438	0	0	10.332	47.1926	5.18042
CL.11630	-2.06847	0.0288614	0.186909	495.368	135.62	199.621	9.92987	104.657	33.9481	2.62181	58.2797
CL.11631	-0.587174	0.322049	0.717808	72.6539	158.705	243.606	152.92	132.05	69.3722	138.956	79.0013
CL.11632	0.785907	0.547116	0.873323	39.6294	17.3132	25.3756	13.9018	0	67.8962	73.4107	24.607
CL.11633	3.30321	NA	NA	0	0	0	2.97896	0.702394	0	0	29.7874
CL.11634	5.43989	NA	NA	0	0	0	0	37.9293	0	0	0
CL.11635	-0.618454	0.187998	0.550333	1479.5	493.427	490.595	1205.49	727.68	984.495	474.548	202.036
CL.11636	0.648647	0.171596	0.52213	92.4686	341.937	215.692	392.23	316.077	318.817	550.58	451.344
CL.11637	-7.31726	NA	NA	95.7711	0	0	0	0	0	0	0
CL.11638	-0.376408	0.267109	0.662607	1083.2	1996.79	784.951	1400.11	1253.07	1263.46	912.39	625.535
CL.11639	0.445614	0.202838	0.572641	364.921	520.84	397.551	742.755	738.216	810.326	457.506	753.103
CL.1164	0.414112	0.374515	0.763689	442.528	516.512	872.074	417.055	304.839	345.385	1407.91	941.54
CL.11640	5.15956	0.128203	NA	0	0	0	0	0	0	31.4617	0
CL.11641	-1.8679	1,59632405756499e-05	0.000472548	300.523	802.18	561.646	642.463	202.29	115.128	212.367	103.608
CL.11642	-0.552093	0.0578703	0.277216	11812.9	5981.73	5613.08	4234.1	6084.84	4445.73	4228.98	4088.64
CL.11643	0.184627	0.947224	0.99173	29.7221	0	0	0	0	2.95201	23.5963	7.12307
CL.11644	-0.129259	0.515973	0.856359	3213.29	3254.89	3059.45	2929.31	3257.7	2848.69	2860.4	2421.84
CL.11645	2.3189	NA	NA	0	0	6.76682	0	34.4173	0	0	0
CL.11646	20.8674	NA	NA	0	0	0	0	66.0251	0	0	0
CL.11647	3.61648	0.064419	0.293955	0	0	13.5336	0	89.9065	0	57.6798	23.3119
CL.11648	-0.225456	0.235896	0.622919	9463.17	9559.8	10809.2	8222.93	8718.82	7123.2	7464.29	9241.86
CL.11649	-2.51941	NA	NA	52.8392	0	0	0	9.13113	0	0	0
CL.1165	-1.13791	NA	NA	0	40.3976	0	0	18.2623	0	0	0
CL.11650	0.0330981	0.894452	0.979971	1423.36	1526.45	1428.65	1367.34	1983.56	1173.42	1301.73	1418.79
CL.11651	1.22399	3,13163567033816e-10	2,481493816344e-08	7044.13	6733.41	6909.77	5048.35	15617	12646.4	16058.6	15790.6
CL.11652	0.695809	0.00028977	0.00595543	2945.79	3617.03	3867.24	3249.05	5258.12	5164.54	5838.77	5900.49
CL.11653	-2.90823	0.308986	0.705411	59.4441	0	7.61268	0	0	8.85603	0	0
CL.11654	-0.158447	0.416407	0.793881	5217.87	4798.65	5349.17	6104.89	5220.9	5252.36	4011.37	4751.74
CL.11655	NA	NA	NA	0	0	0	0	0	0	0	0
CL.11656	0.453675	0.232561	0.618302	392.992	285.669	177.629	383.293	410.198	407.377	437.842	440.335
CL.11657	0.380887	0.379968	0.768508	290.616	243.828	325.653	144.976	358.923	349.813	401.137	199.446
CL.11658	4.93385	NA	NA	0	0	0	0	26.691	0	0	0
CL.11659	0.138689	0.709224	0.937353	4814.97	1667.84	2112.94	5922.18	5010.18	5674.5	2957.4	2339.6
CL.1166	0.0733374	0.849031	0.97204	264.196	406.861	411.084	339.602	337.149	240.589	511.253	409.253
CL.11660	0.421144	0.200322	0.568684	435.924	877.204	1028.56	695.091	917.327	820.658	943.852	1387.06
CL.11661	5.72899	NA	NA	0	0	0	0	46.358	0	0	0
CL.11662	0.0780767	0.713555	0.938548	3110.91	4085.93	4898.33	4153.67	3765.54	4056.06	4742.86	4593.73
CL.11663	NA	NA	NA	0	0	0	0	0	0	0	0
CL.11664	0.781305	0.450045	0.818004	0	40.3976	102.348	39.7195	54.7868	82.6563	49.8144	127.568
CL.11665	0.2114	0.912599	0.983214	0	0	34.68	31.7756	42.1437	11.07	0	23.9594
CL.11666	-6.70632	NA	NA	62.7466	0	0	0	0	0	0	0
CL.11667	-0.480462	0.00334029	0.0423171	28468.8	27027.4	24418.1	25621.1	18324.1	19687.7	18904.6	18724
CL.11668	5.74503	0.0900313	NA	0	0	0	0	19.667	0	0	27.1972
CL.11669	-2.18006	0.227377	0.611504	79.2588	25.9699	0	7.9439	4.21437	10.332	10.4872	0
CL.1167	5.79304	NA	NA	0	0	0	0	48.4652	0	0	0
CL.11670	0.312998	0.217952	0.597175	8693.7	5771.08	5369.47	7649.97	7986.93	12183.7	5870.23	8096.99
CL.11671	NA	NA	NA	0	0	0	0	0	0	0	0
CL.11672	-1.85397	0.45734	0.82246	0	20.1988	0	47.6634	0	4.42801	0	14.2461
CL.11673	0.0282799	0.951481	0.993434	138.703	238.057	312.966	301.868	242.326	163.836	225.476	380.761
CL.11674	6.70582	0.0197123	0.146402	0	0	0	0	0	0	73.4107	18.1315
CL.11675	1.41115	0.66581	NA	0	0	0	11.9158	26.691	0	0	5.18042
CL.11676	-0.94362	0.551097	0.874998	82.5613	0	25.3756	25.8177	0	20.6641	26.2181	22.6643
CL.11677	-1.1359	0.293955	0.689478	52.8392	34.6265	56.6721	25.8177	2.80958	26.5681	31.4617	16.8363
CL.11678	0.380098	0.294396	0.689816	287.313	416.961	489.749	520.325	500.105	357.931	676.427	700.004
CL.11679	2.41694	0.379941	0.768508	0	0	0	13.9018	0	9.59403	65.5453	0
CL.1168	0.237373	0.446286	0.815381	4392.26	1411.03	1861.72	2754.55	2798.34	3693.7	3096.36	2691.23
CL.11680	0.031856	0.912088	0.983134	614.256	683.873	480.444	623.596	646.203	671.582	563.689	572.436
CL.11681	0.528984	0.176659	0.531251	188.24	328.952	302.815	484.578	602.654	464.941	369.675	446.811
CL.11682	-1.30078	0.00021014	0.00458568	994.038	1387.95	1042.09	1074.41	639.881	455.347	207.123	520.632
CL.11683	-1.03953	3,33752195317513e-06	0.000116311	19141	14609.5	18585.1	16626.6	6509.79	6501.8	9737.4	10801.8
CL.11684	-5.82557	NA	NA	0	0	33.8341	0	0	0	0	0
CL.11685	5.69428	0.0929266	NA	0	0	0	0	15.4527	0	0	29.7874
CL.11686	-0.295798	0.336781	0.732265	838.823	803.623	1055.62	556.073	833.04	653.87	550.58	612.584
CL.11687	1.09192	0.290611	0.686567	0	46.1687	54.1346	41.7055	67.4298	60.5162	133.712	42.7384
CL.11688	-6.39058	0.0594804	NA	0	40.3976	0	9.92987	0	0	0	0
CL.11689	3.79065	0.0617524	0.287663	0	0	10.1502	0	74.4538	60.5162	0	10.3608
CL.1169	5.20894	NA	NA	0	0	0	0	32.3101	0	0	0
CL.11690	1.80052	0.564468	0.882752	0	60.5964	0	0	0	5.90402	136.334	68.6405
CL.11691	1.70997	0.237486	0.624619	0	0	30.4507	23.8317	53.382	30.9961	78.6543	16.8363
CL.11692	5.78052	0.0880501	NA	0	0	0	0	42.1437	5.90402	0	0
CL.11693	5.81378	NA	NA	0	0	0	0	49.1676	0	0	0
CL.11694	5.57669	NA	NA	0	0	0	0	0	0	41.949	0
CL.11695	-0.0965677	NA	NA	52.8392	0	0	0	49.1676	0	0	0
CL.11696	-4.25117	0.0104269	0.0958517	158.518	40.3976	1.69171	55.6073	0	13.284	0	0
CL.11697	-0.400484	0.0703798	0.306588	7189.44	4979	4407.74	4960.96	4158.88	4656.06	4074.29	3424.25
CL.11698	0.421644	0.332862	0.728737	138.703	297.211	191.163	280.022	278.148	221.401	327.726	388.531
CL.11699	0.243967	0.575049	0.886065	125.493	301.539	272.365	223.422	249.35	329.887	246.45	268.086
CL.117	5.44961	0.107953	NA	0	0	0	0	5.61915	0	32.7726	0
CL.1170	0.463252	0.14624	0.478438	5769.38	1957.84	2277.88	4027.56	5762.44	5987.41	3993.02	3598.45
CL.11700	0.0803011	0.978288	0.998116	0	0	33.8341	0	19.667	16.236	0	0
CL.11701	-1.61995	NA	NA	56.1417	0	0	0	0	0	0	18.1315
CL.11702	-0.0747372	0.774602	0.95452	1111.27	1035.91	1132.6	1185.63	1257.29	783.02	1234.87	966.795
CL.11703	2.98339	NA	NA	0	5.77108	0	0	44.9532	0	0	0
CL.11704	0.0126748	0.945031	0.991244	4689.48	4730.84	4757.08	4868.62	4433.51	4992.59	5428.46	4362.56
CL.11705	-0.768019	0.805431	0.962965	0	31.7409	0	5.95792	0	0	0	22.0168
CL.11706	5.48316	NA	NA	0	0	0	0	0	0	39.3272	0
CL.11707	0.472556	0.505594	0.851488	19.8147	115.422	159.02	77.453	78.6682	131.364	95.6961	211.102
CL.11708	NA	NA	NA	0	0	0	0	0	0	0	0
CL.11709	-0.36948	0.41931	0.796153	211.357	227.958	270.673	193.633	168.575	183.025	238.585	110.731
CL.1171	-0.764742	0.000147888	0.00340928	5321.9	5618.15	5450.68	4146.71	2586.92	3182.27	3072.76	3244.88
CL.11710	-0.435529	0.69581	0.933878	0	115.422	43.1385	60.5722	30.9053	57.5642	40.6381	33.0251
CL.11711	-0.0874278	0.774179	0.95452	1720.58	813.722	876.304	1336.56	1069.04	1406.63	1019.88	970.033
CL.11712	4.93385	NA	NA	0	0	0	0	26.691	0	0	0
CL.11713	0.210769	0.520475	0.85802	1723.88	630.491	954.968	1442.81	1319.1	1579.32	1609.79	991.402
CL.11714	1.37155	0.665846	0.923444	0	0	0	15.8878	0	2.21401	39.3272	0
CL.11715	-0.442563	NA	NA	46.2343	0	0	0	0	0	34.0835	0
CL.11716	5.39387	0.111633	NA	0	0	0	0	30.9053	0	0	5.82797
CL.11717	1.29249	NA	NA	0	0	0	15.8878	0	0	39.3272	0
CL.11718	1.17615	0.214472	0.592236	0	14.4277	184.396	121.144	146.098	132.84	285.777	161.888
CL.11719	0.908431	0.000258518	0.0054255	1017.16	1194.61	1515.77	1715.88	2319.31	2892.97	2160.37	2850.52
CL.1172	-0.533048	0.244614	0.633655	728.191	190.446	260.523	441.879	329.423	292.987	235.963	260.316
CL.11720	5.27024	NA	NA	0	0	0	0	33.7149	0	0	0
CL.11721	-0.300463	0.40768	0.787619	947.804	600.192	651.307	379.321	695.37	428.041	563.689	405.367
CL.11722	5.54283	NA	NA	0	0	0	0	40.7389	0	0	0
CL.11723	-5.62413	0.097717	NA	29.7221	0	0	0	0	0	0	0
CL.11724	-0.0327855	0.941674	0.991066	132.098	582.879	408.547	393.223	358.923	472.321	325.105	327.014
CL.11725	0.950887	0.344549	0.738896	19.8147	14.4277	21.9922	25.8177	57.5963	41.3281	41.949	18.1315
CL.11726	0.212087	0.684205	0.929944	85.8637	137.063	141.257	176.752	200.885	152.766	110.116	163.183
CL.11727	0.0486515	0.945522	0.991244	181.635	77.9096	82.8936	35.7475	148.908	92.9883	102.251	45.9762
CL.11728	0.0553877	0.8202	0.966141	1132.74	1087.85	1032.79	1321.67	1109.08	1136.52	1434.13	1076.88
CL.11729	0.196001	0.512506	0.854961	805.798	525.168	631.006	683.175	823.206	811.802	854.71	540.706
CL.1173	-0.0114984	0.971955	0.996805	1165.77	549.695	574.334	1035.69	728.383	985.233	806.207	777.71
CL.11730	0.218663	0.519104	0.857568	832.218	917.602	974.422	959.226	1746.15	1092.24	540.093	905.925
CL.11731	0.891897	0.0343475	0.207059	122.191	201.988	238.53	202.569	484.652	360.883	306.752	270.029
CL.11732	0.492653	0.0880294	0.349368	961.013	790.638	653.844	941.352	1366.16	1295.93	761.636	1280.86
CL.11733	1.25854	0.258996	0.653426	0	25.9699	32.1424	53.6213	108.169	28.7821	104.872	27.1972
CL.11734	0.145994	0.940307	0.990985	0	28.8554	10.1502	45.6774	0	2.95201	0	90.6573
CL.11735	-0.462113	0.244336	0.633444	485.46	305.867	568.413	415.069	212.123	256.825	353.944	466.237
CL.11736	-6.45557	NA	NA	0	0	52.4429	0	0	0	0	0
CL.11737	-0.677829	0.00730396	0.0752419	2021.1	3283.75	3767.43	2617.51	1813.58	1515.86	1782.83	2196.5
CL.11738	20.9765	NA	NA	0	0	0	0	71.6442	0	0	0
CL.11739	0.293423	0.353339	0.744821	4752.23	2660.47	2327.79	1302.8	3323.03	3577.1	3721.66	2906.86
CL.1174	-0.0788892	0.795041	0.960238	2490.05	1249.44	1054.78	1648.36	1475.73	1695.93	1119.51	1803.43
CL.11740	-0.174499	0.678785	0.928865	1717.27	662.232	645.386	401.167	556.296	859.773	1068.39	549.772
CL.11741	1.1855	3,94535023582648e-11	3,51372217583863e-09	10822.1	11418.1	13963.3	10216.8	25852.3	25267	27826.6	26640.9
CL.11742	0.373041	0.10766	0.398798	2291.9	3093.3	3153.34	3743.56	3926.38	4639.08	3034.75	4307.52
CL.11743	0.211386	0.446988	0.815381	1071.65	911.831	1234.1	1421.96	1121.72	1027.3	1789.39	1438.21
CL.11744	0.289057	0.313753	0.709255	942.85	1129.69	1208.72	1046.61	2013.76	1059.03	1140.49	1074.94
CL.11745	-0.025704	0.928904	0.987874	1325.93	1159.99	1286.54	1613.6	2003.23	1033.2	1255.85	999.173
CL.11746	-2.86197	0.164529	0.510456	118.888	0	5.92097	43.6914	0	0	23.5963	0
CL.11747	NA	NA	NA	0	0	0	0	0	0	0	0
CL.11748	1.70114	0.553481	0.876434	18.1635	0	0	0	43.5484	14.76	0	0
CL.11749	5.74731	NA	NA	0	0	0	0	0	0	47.1926	0
CL.1175	0.986379	0.601413	0.899657	6.6049	0	0	33.7616	26.691	1.476	38.0163	14.2461
CL.11750	1.94328	0.253221	0.645124	0	10.0994	5.07512	19.8597	89.9065	8.85603	36.7053	0
CL.11751	2.77771	0.228183	0.613038	0	0	8.45853	0	12.6431	8.85603	31.4617	7.12307
CL.11752	0.571913	0.0072537	0.0749756	2341.44	2021.32	2079.11	2124	3311.79	3761.6	3135.69	2522.86
CL.11753	5.68466	NA	NA	0	0	0	0	44.9532	0	0	0
CL.11754	5.00769	NA	NA	0	0	0	0	28.0958	0	0	0
CL.11755	0.152884	0.897587	0.980831	0	92.3373	5.92097	98.3057	41.4413	23.6161	73.4107	80.2964
CL.11756	-0.21697	0.948011	NA	0	0	6.76682	0	0	5.90402	0	0
CL.11757	NA	NA	NA	0	0	0	0	0	0	0	0
CL.11758	-4.49438	0.183416	NA	36.327	0	0	0	1.40479	0	0	0
CL.11759	6.64662	0.00925522	0.0884047	0	0	0	0	40.7389	0	28.8399	18.1315
CL.1176	5.57669	NA	NA	0	0	0	0	0	0	41.949	0
CL.11760	-6.51756	0.0283303	0.184674	0	11.5422	25.3756	17.8738	0	0	0	0
CL.11761	0.530917	0.0416276	0.231771	848.73	692.53	857.695	804.32	1067.64	1052.39	1480.01	1031.55
CL.11762	5.38553	NA	NA	0	0	0	0	36.5245	0	0	0
CL.11763	-0.531062	0.558569	0.879836	1188.88	529.497	263.906	31.7756	315.375	280.441	582.042	215.635
CL.11764	1.37169	NA	NA	0	0	43.9843	0	0	39.8521	39.3272	35.6154
CL.11765	0.136778	0.608931	0.902578	995.689	871.433	1131.75	748.712	995.995	870.843	1010.71	1242.65
CL.11766	1.33071	1,30223576254593e-10	1,09652613586187e-08	113370	69235.7	70501.8	68854.7	211145	203041	198400	197220
CL.11767	6.0434	0.0697897	0.305269	0	0	0	0	0	13.284	44.5708	0
CL.11768	-6.45768	NA	NA	52.8392	0	0	0	0	0	0	0
CL.11769	5.07794	NA	NA	0	0	0	0	29.5006	0	0	0
CL.1177	-6.15709	0.0695146	NA	42.9319	0	0	0	0	0	0	0
CL.11770	1.68574	0.545899	0.872313	0	0	0	19.8597	40.7389	0	23.5963	0
CL.11771	5.27024	NA	NA	0	0	0	0	33.7149	0	0	0
CL.11772	5.48316	NA	NA	0	0	0	0	0	0	39.3272	0
CL.11773	5.32903	NA	NA	0	0	0	0	35.1197	0	0	0
CL.11774	5.89987	NA	NA	0	0	0	0	0	0	52.4362	0
CL.11775	0.709366	0.00054765	0.010163	2235.76	2141.07	2728.72	2243.16	3981.17	3325.44	4360.07	3625
CL.11776	7.75044	8,75855298229409e-05	0.00214992	0	0	0	0	118.705	8.85603	60.3016	0.647552
CL.11777	0.640552	0.0020499	0.0293003	10528.2	6434.76	7354.69	7308.39	10901.2	12554.2	13498.4	12344.9
CL.11778	0.994028	0.55743	0.879276	0	0	50.7512	27.8036	39.3341	63.4682	0	54.3944
CL.11779	5.54283	NA	NA	0	0	0	0	40.7389	0	0	0
CL.1178	-0.753931	0.134875	0.456966	181.635	302.982	179.321	166.822	143.288	76.7522	125.847	146.347
CL.11780	5.8256	NA	NA	0	0	0	0	0	0	49.8144	0
CL.11781	5.68466	NA	NA	0	0	0	0	44.9532	0	0	0
CL.11782	5.27024	NA	NA	0	0	0	0	33.7149	0	0	0
CL.11783	5.03327	0.137899	NA	0	0	0	0	0	0	28.8399	0
CL.11784	5.00769	NA	NA	0	0	0	0	28.0958	0	0	0
CL.11785	-0.234258	0.401479	0.782823	1538.94	2989.42	2491.88	1811.21	1508.74	1628.03	2557.58	1817.03
CL.11786	-0.377527	NA	NA	49.5368	0	0	0	37.9293	0	0	0
CL.11787	5.66353	0.0947167	NA	0	0	0	0	36.5245	0	0	7.77062
CL.11788	5.14493	NA	NA	0	0	0	0	30.9053	0	0	0
CL.11789	5.66452	NA	NA	0	0	0	0	0	0	44.5708	0
CL.1179	0.0475775	0.809357	0.963239	4709.3	5323.82	5625.77	5072.18	4370.3	6134.27	5054.85	5867.47
CL.11790	5.93229	NA	NA	0	0	0	0	53.382	0	0	0
CL.11791	-2.38768	0.465635	NA	0	12.9849	0	25.8177	0	7.38002	0	0
CL.11792	-0.797944	0.808522	NA	0	12.9849	0	0	0	7.38002	0	0
CL.11793	-1.66815	0.379061	0.768292	85.8637	0	21.9922	25.8177	0	35.4241	6.55453	0
CL.11794	-6.04115	0.0749949	NA	39.6294	0	0	0	0	0	0	0
CL.11795	5.1303	0.1304	NA	0	0	0	0	26.691	0	3.93272	0
CL.11796	5.14493	NA	NA	0	0	0	0	30.9053	0	0	0
[truncated: 45,969 more rows]

## Sheet: Table S5
Table S5. Functional annotations of DEGs between water and land forms of Riccia fluitans
Category	ID	Term	Genes	adj_pval	intersection_size	term_size
GO:BP	GO:0006026	aminoglycan catabolic process	AT1G02360,AT3G12500,AT5G24090	0.000214478	3	24
GO:BP	GO:0006030	chitin metabolic process	AT1G02360,AT3G12500,AT5G24090	0.000214478	3	24
GO:BP	GO:0006032	chitin catabolic process	AT1G02360,AT3G12500,AT5G24090	0.000214478	3	24
GO:BP	GO:0046348	amino sugar catabolic process	AT1G02360,AT3G12500,AT5G24090	0.000214478	3	24
GO:BP	GO:1901072	glucosamine-containing compound catabolic process	AT1G02360,AT3G12500,AT5G24090	0.000214478	3	24
GO:BP	GO:0006022	aminoglycan metabolic process	AT1G02360,AT3G12500,AT5G24090	0.000338359	3	31
GO:BP	GO:1901071	glucosamine-containing compound metabolic process	AT1G02360,AT3G12500,AT5G24090	0.000338359	3	31
GO:BP	GO:0006040	amino sugar metabolic process	AT1G02360,AT3G12500,AT5G24090	0.00112404	3	48
GO:BP	GO:0015979	photosynthesis	AT1G44575,AT2G05100,AT2G42600,AT3G22840	0.001939	4	282
GO:BP	GO:0009628	response to abiotic stimulus	AT1G02360,AT1G07890,AT1G44575,AT1G76680,AT2G05100,AT2G30870,AT3G22840,AT3G23920	0.00403051	8	2173
GO:BP	GO:1901136	carbohydrate derivative catabolic process	AT1G02360,AT3G12500,AT5G24090	0.00403051	3	80
GO:BP	GO:0006950	response to stress	AT1G02360,AT1G07890,AT1G24020,AT1G76680,AT2G05100,AT2G30870,AT2G39050,AT3G12500,AT3G22840,AT3G23920	0.00721827	10	3930
GO:BP	GO:0016998	cell wall macromolecule catabolic process	AT1G02360,AT3G12500	0.00721827	2	33
GO:BP	GO:0010218	response to far red light	AT2G05100,AT3G22840	0.0112976	2	45
GO:BP	GO:0006091	generation of precursor metabolites and energy	AT2G05100,AT2G25060,AT2G42600,AT5G48300,ATCG01010	0.0112976	5	490
GO:BP	GO:0006580	ethanolamine metabolic process	AT1G43710	0.0112976	1	2
GO:BP	GO:0090332	stomatal closure	AT2G05100,AT2G39050	0.0112976	2	57
GO:BP	GO:0070887	cellular response to chemical stimulus	AT1G02360,AT1G07890,AT1G24020,AT1G76680,AT2G05100	0.0112976	5	1781
GO:BP	GO:0042439	ethanolamine-containing compound metabolic process	AT1G43710	0.0126219	1	3
GO:BP	GO:0009642	response to light intensity	AT2G05100,AT3G22840,AT5G24090	0.013743	3	152
GO:BP	GO:0042882	L-arabinose transmembrane transport	AT4G02050	0.0152637	1	1
GO:BP	GO:0015751	arabinose transmembrane transport	AT4G02050	0.0152637	1	1
GO:BP	GO:0009644	response to high light intensity	AT2G05100,AT3G22840	0.0162552	2	64
GO:BP	GO:1901160	primary amino compound metabolic process	AT1G43710	0.0163798	1	5
GO:BP	GO:0010114	response to red light	AT2G05100,AT3G22840	0.0163798	2	67
GO:BP	GO:0072593	reactive oxygen species metabolic process	AT1G07890,AT2G05100,AT4G36430	0.0166757	3	201
GO:BP	GO:1901700	response to oxygen-containing compound	AT1G07890,AT1G24020,AT1G76680,AT2G05100,AT2G30870	0.0178423	5	1750
GO:BP	GO:0009414	response to water deprivation	AT2G05100,AT2G30870,AT3G23920,AT5G24090	0.0191399	4	424
GO:BP	GO:0015980	energy derivation by oxidation of organic compounds	AT2G42600,AT5G48300,ATCG01010	0.0192197	3	167
GO:BP	GO:0009415	response to water	AT2G05100,AT2G30870,AT3G23920,AT5G24090	0.0192197	4	436
GO:BP	GO:0000272	polysaccharide catabolic process	AT3G12500,AT3G23920,AT5G24090	0.0192197	3	195
GO:BP	GO:0009769	photosynthesis, light harvesting in photosystem II	AT2G05100	0.0199764	1	4
GO:BP	GO:0033554	cellular response to stress	AT1G02360,AT1G07890,AT1G76680,AT3G12500,AT3G22840	0.0202303	5	1273
GO:BP	GO:0015750	pentose transmembrane transport	AT4G02050	0.0202303	1	2
GO:BP	GO:0001101	response to acid chemical	AT2G05100,AT2G30870,AT3G23920,AT5G24090	0.0216247	4	466
GO:BP	GO:0009416	response to light stimulus	AT1G44575,AT2G05100,AT3G22840,AT5G24090,AT5G48300	0.0267764	5	779
GO:BP	GO:1903428	positive regulation of reactive oxygen species biosynthetic process	AT2G05100	0.0267764	1	7
GO:BP	GO:0042221	response to chemical	AT1G02360,AT1G07890,AT1G24020,AT1G76680,AT2G05100,AT2G30870	0.0267764	6	3114
GO:BP	GO:0050896	response to stimulus	AT1G02360,AT1G07890,AT1G24020,AT1G44575,AT1G76680,AT2G05100,AT2G30870,AT2G39050,AT3G12500,AT3G22840,AT3G23920,AT4G36430,AT5G14740,AT5G24090,AT5G48300,AT5G54500	0.0267764	16	6380
GO:BP	GO:0071492	cellular response to UV-A	AT3G22840	0.0267764	1	4
GO:BP	GO:0009314	response to radiation	AT1G44575,AT2G05100,AT3G22840,AT5G24090,AT5G48300	0.0267764	5	800
GO:BP	GO:0070141	response to UV-A	AT3G22840	0.0267764	1	4
GO:BP	GO:0005976	polysaccharide metabolic process	AT3G12500,AT3G23920,AT5G24090,AT5G48300	0.0276306	4	490
GO:BP	GO:0036294	cellular response to decreased oxygen levels	AT1G02360,AT1G76680	0.0276335	2	242
GO:BP	GO:0071453	cellular response to oxygen levels	AT1G02360,AT1G76680	0.0276335	2	242
GO:BP	GO:0071456	cellular response to hypoxia	AT1G02360,AT1G76680	0.0276335	2	240
GO:BP	GO:0005982	starch metabolic process	AT3G23920,AT5G48300	0.0276335	2	71
GO:BP	GO:1990066	energy quenching	AT1G44575	0.0276335	1	15
GO:BP	GO:0098754	detoxification	AT1G07890,AT2G30870,AT4G36430	0.0276335	3	289
GO:BP	GO:1902074	response to salt	AT2G05100,AT2G30870,AT3G23920,AT5G24090	0.0276335	4	544
GO:BP	GO:0002239	response to oomycetes	AT1G02360	0.0276335	1	78
GO:BP	GO:0010196	nonphotochemical quenching	AT1G44575	0.0276335	1	15
GO:BP	GO:0010118	stomatal movement	AT2G05100,AT2G39050	0.0293074	2	161
GO:BP	GO:0070482	response to oxygen levels	AT1G02360,AT1G76680	0.0293573	2	272
GO:BP	GO:0071486	cellular response to high light intensity	AT3G22840	0.0293573	1	6
GO:BP	GO:0080170	hydrogen peroxide transmembrane transport	AT3G26520	0.0293573	1	6
GO:BP	GO:0042744	hydrogen peroxide catabolic process	AT1G07890,AT4G36430	0.0293573	2	101
GO:BP	GO:0036293	response to decreased oxygen levels	AT1G02360,AT1G76680	0.0293573	2	271
GO:BP	GO:0034308	primary alcohol metabolic process	AT1G43710	0.0293573	1	23
GO:BP	GO:2000379	positive regulation of reactive oxygen species metabolic process	AT2G05100	0.0293573	1	10
GO:BP	GO:0009056	catabolic process	AT1G02360,AT1G07890,AT2G30870,AT3G12500,AT3G23920,AT4G36430,AT5G24090	0.0293573	7	1872
GO:BP	GO:0009636	response to toxic substance	AT1G07890,AT2G30870,AT4G36430	0.0293573	3	330
GO:BP	GO:0001666	response to hypoxia	AT1G02360,AT1G76680	0.0293573	2	267
GO:BP	GO:0016052	carbohydrate catabolic process	AT3G12500,AT3G23920,AT5G24090	0.0299602	3	301
GO:BP	GO:0015988	energy coupled proton transmembrane transport, against electrochemical gradient	ATCG01010	0.0309488	1	4
GO:BP	GO:0015990	electron transport coupled proton transport	ATCG01010	0.0309488	1	4
GO:BP	GO:0071490	cellular response to far red light	AT3G22840	0.0323789	1	8
GO:BP	GO:0010117	photoprotection	AT3G22840	0.0348742	1	9
GO:BP	GO:0009809	lignin biosynthetic process	AT1G07890	0.0348742	1	51
GO:BP	GO:0051716	cellular response to stimulus	AT1G02360,AT1G07890,AT1G24020,AT1G76680,AT2G05100,AT3G12500,AT3G22840	0.0348742	7	3281
GO:BP	GO:0044036	cell wall macromolecule metabolic process	AT1G02360,AT3G12500	0.0350962	2	179
GO:BP	GO:0009266	response to temperature stimulus	AT1G07890,AT2G05100,AT3G22840,AT5G24090	0.0359275	4	658
GO:BP	GO:0042743	hydrogen peroxide metabolic process	AT1G07890,AT4G36430	0.0361311	2	122
GO:BP	GO:0009269	response to desiccation	AT2G05100	0.0361311	1	17
GO:BP	GO:1903426	regulation of reactive oxygen species biosynthetic process	AT2G05100	0.0361311	1	17
GO:BP	GO:0097306	cellular response to alcohol	AT1G24020,AT2G05100	0.0383018	2	320
GO:BP	GO:0071215	cellular response to abscisic acid stimulus	AT1G24020,AT2G05100	0.0383018	2	320
GO:BP	GO:0071484	cellular response to light intensity	AT3G22840	0.0383018	1	11
GO:BP	GO:0009645	response to low light intensity stimulus	AT2G05100	0.038322	1	19
GO:BP	GO:0071491	cellular response to red light	AT3G22840	0.040619	1	12
GO:BP	GO:0009768	photosynthesis, light harvesting in photosystem I	AT2G05100	0.0432517	1	22
GO:BP	GO:0009808	lignin metabolic process	AT1G07890	0.0437344	1	75
GO:BP	GO:0034599	cellular response to oxidative stress	AT1G07890	0.0460778	1	80
GO:BP	GO:0015976	carbon utilization	AT5G14740	0.0488601	1	10
GO:BP	GO:0005978	glycogen biosynthetic process	AT5G48300	0.0488601	1	9
GO:BP	GO:0031408	oxylipin biosynthetic process	AT1G76680	0.0499484	1	30
GO:CC	GO:0009503	thylakoid light-harvesting complex	AT1G44575,AT2G05100	0.000158075	2	8
GO:CC	GO:0009517	PSII associated light-harvesting complex II	AT1G44575,AT2G05100	0.000158075	2	6
GO:CC	GO:0030076	light-harvesting complex	AT1G44575,AT2G05100	0.000158075	2	8
GO:CC	GO:0009536	plastid	AT1G07890,AT1G44575,AT2G05100,AT2G30870,AT2G42600,AT3G22840,AT3G23920,AT3G26520,AT4G16160,AT4G21020,AT5G14740,AT5G48300,AT5G54500,ATCG01010	0.000533927	14	2878
GO:CC	GO:0009523	photosystem II	AT1G44575,AT2G05100,AT3G22840	0.000533927	3	78
GO:CC	GO:0098807	chloroplast thylakoid membrane protein complex	AT1G44575,AT2G05100	0.000534701	2	20
GO:CC	GO:0009521	photosystem	AT1G44575,AT2G05100,AT3G22840	0.000732174	3	97
GO:CC	GO:0009507	chloroplast	AT1G07890,AT1G44575,AT2G05100,AT2G30870,AT2G42600,AT3G22840,AT3G23920,AT3G26520,AT4G16160,AT5G14740,AT5G48300,ATCG01010	0.00106604	12	2370
GO:CC	GO:0019867	outer membrane	AT1G44575,AT2G05100,AT3G22840,AT4G16160,AT5G14740,ATCG01010	0.001393	6	557
GO:CC	GO:0031968	organelle outer membrane	AT1G44575,AT2G05100,AT3G22840,AT4G16160,AT5G14740,ATCG01010	0.001393	6	557
GO:CC	GO:0009522	photosystem I	AT2G05100,AT3G22840	0.00283756	2	43
GO:CC	GO:0009535	chloroplast thylakoid membrane	AT1G44575,AT2G05100,AT3G22840,AT5G14740,ATCG01010	0.00283756	5	425
GO:CC	GO:0042651	thylakoid membrane	AT1G44575,AT2G05100,AT3G22840,AT5G14740,ATCG01010	0.00283756	5	444
GO:CC	GO:0034357	photosynthetic membrane	AT1G44575,AT2G05100,AT3G22840,AT5G14740,ATCG01010	0.00283756	5	445
GO:CC	GO:0042170	plastid membrane	AT1G44575,AT2G05100,AT3G22840,AT4G16160,AT5G14740,ATCG01010	0.00283756	6	683
GO:CC	GO:0055035	plastid thylakoid membrane	AT1G44575,AT2G05100,AT3G22840,AT5G14740,ATCG01010	0.00283756	5	427
GO:CC	GO:0031976	plastid thylakoid	AT1G44575,AT2G05100,AT3G22840,AT5G14740,ATCG01010	0.00472622	5	524
GO:CC	GO:0005773	vacuole	AT2G25060,AT2G30870,AT3G12500,AT3G26520,AT3G62290,AT4G36430,AT5G54500	0.00472622	7	1159
GO:CC	GO:0009534	chloroplast thylakoid	AT1G44575,AT2G05100,AT3G22840,AT5G14740,ATCG01010	0.00472622	5	522
GO:CC	GO:0030931	heterotetrameric ADPG pyrophosphorylase complex	AT5G48300	0.00549451	1	1
GO:CC	GO:0030929	ADPG pyrophosphorylase complex	AT5G48300	0.00549451	1	1
GO:CC	GO:0043673	sexine	AT3G26520	0.00657083	1	2
GO:CC	GO:0043674	columella	AT3G26520	0.00657083	1	2
GO:CC	GO:0009579	thylakoid	AT1G44575,AT2G05100,AT3G22840,AT5G14740,ATCG01010	0.00690538	5	602
GO:CC	GO:0005829	cytosol	AT1G07890,AT1G24020,AT1G43710,AT1G76680,AT2G30870,AT2G42600,AT3G26520,AT3G62290	0.00816731	8	2754
GO:CC	GO:0005737	cytoplasm	AT1G07890,AT1G24020,AT1G43710,AT1G44575,AT1G76680,AT2G05100,AT2G25060,AT2G30870,AT2G38860,AT2G39050,AT2G42600,AT3G12500,AT3G22840,AT3G23920,AT3G26520,AT3G62290,AT4G16160,AT4G21020,AT4G36430	0.0101141	19	10520
GO:CC	GO:0098796	membrane protein complex	AT1G44575,AT2G05100,AT3G22840,AT4G16160	0.010306	4	627
GO:CC	GO:0043667	pollen wall	AT3G26520	0.010306	1	4
GO:CC	GO:0009526	plastid envelope	AT1G44575,AT2G05100,AT3G22840,AT4G16160,AT5G14740,ATCG01010	0.010306	6	997
GO:CC	GO:0043668	exine	AT3G26520	0.010306	1	4
GO:CC	GO:0048046	apoplast	AT2G30870,AT2G42600,AT5G14740,AT5G48300	0.0115594	4	489
GO:CC	GO:0005794	Golgi apparatus	AT1G07890,AT2G38860,AT2G39050,AT3G26520,AT3G62290	0.0137678	5	1256
GO:CC	GO:0000325	plant-type vacuole	AT2G30870,AT3G12500,AT3G26520,AT3G62290,AT5G54500	0.0137678	5	812
GO:CC	GO:0098588	bounding membrane of organelle	AT1G44575,AT2G05100,AT3G22840,AT3G26520,AT4G16160,AT5G14740,ATCG01010	0.0148597	7	1488
GO:CC	GO:0099503	secretory vesicle	AT2G25060,AT3G12500	0.0178297	2	173
GO:CC	GO:0030312	external encapsulating structure	AT1G07890,AT2G30870,AT3G26520	0.0179221	3	460
GO:CC	GO:0055044	symplast	AT1G07890,AT2G25060,AT2G42600,AT3G62290	0.020116	4	917
GO:CC	GO:0070161	anchoring junction	AT1G07890,AT2G25060,AT2G42600,AT3G62290	0.020116	4	916
GO:CC	GO:0005911	cell-cell junction	AT1G07890,AT2G25060,AT2G42600,AT3G62290	0.020116	4	916
GO:CC	GO:0030054	cell junction	AT1G07890,AT2G25060,AT2G42600,AT3G62290	0.020116	4	916
GO:CC	GO:0009506	plasmodesma	AT1G07890,AT2G25060,AT2G42600,AT3G62290	0.020116	4	916
GO:CC	GO:0005576	extracellular region	AT1G07890,AT2G30870,AT2G42600,AT4G36430,AT5G14740,AT5G24090,AT5G48300	0.0247681	7	1894
GO:CC	GO:0046930	pore complex	AT4G16160	0.0323286	1	16
GO:CC	GO:0009505	plant-type cell wall	AT1G07890,AT2G30870	0.0390507	2	396
GO:CC	GO:0005618	cell wall	AT1G07890,AT2G30870	0.0431544	2	431
GO:CC	GO:0031975	envelope	AT1G44575,AT2G05100,AT3G22840,AT4G16160,AT5G14740,ATCG01010	0.0431544	6	1511
GO:CC	GO:0031967	organelle envelope	AT1G44575,AT2G05100,AT3G22840,AT4G16160,AT5G14740,ATCG01010	0.0431544	6	1511
GO:MF	GO:0004568	chitinase activity	AT1G02360,AT3G12500,AT5G24090	0.000402433	3	24
GO:MF	GO:0019840	isoprenoid binding	AT1G24020,AT1G44575	0.000923977	2	22
GO:MF	GO:0016168	chlorophyll binding	AT1G44575,AT2G05100	0.00446525	2	34
GO:MF	GO:0102705	serine decarboxylase activity	AT1G43710	0.00620369	1	1
GO:MF	GO:0051738	xanthophyll binding	AT1G44575	0.00620369	1	1
GO:MF	GO:0046409	p-coumarate 3-hydroxylase activity	AT1G07890	0.00620369	1	2
GO:MF	GO:0061783	peptidoglycan muralytic activity	AT5G24090	0.00985292	1	1
GO:MF	GO:0046906	tetrapyrrole binding	AT1G07890,AT1G44575,AT2G05100	0.00985292	3	418
GO:MF	GO:0042900	arabinose transmembrane transporter activity	AT4G02050	0.00985292	1	1
GO:MF	GO:0003796	lysozyme activity	AT5G24090	0.00985292	1	1
GO:MF	GO:0016629	12-oxophytodienoate reductase activity	AT1G76680	0.00985292	1	3
GO:MF	GO:0004553	hydrolase activity, hydrolyzing O-glycosyl compounds	AT1G02360,AT3G12500,AT3G23920,AT5G24090	0.00985292	4	399
GO:MF	GO:0016688	L-ascorbate peroxidase activity	AT1G07890	0.00985292	1	8
GO:MF	GO:0019904	protein domain specific binding	AT1G44575,AT2G05100	0.00985292	2	97
GO:MF	GO:0016831	carboxy-lyase activity	AT1G43710,AT2G42600	0.00985292	2	72
GO:MF	GO:0031409	pigment binding	AT1G44575	0.00985292	1	2
GO:MF	GO:0010181	FMN binding	AT1G76680,AT5G54500	0.00985292	2	29
GO:MF	GO:0003954	NADH dehydrogenase activity	AT5G54500,ATCG01010	0.0110278	2	42
GO:MF	GO:0003955	NAD(P)H dehydrogenase (quinone) activity	AT5G54500,ATCG01010	0.0110278	2	41
GO:MF	GO:0050136	NADH dehydrogenase (quinone) activity	AT5G54500,ATCG01010	0.0110278	2	40
GO:MF	GO:0015146	pentose transmembrane transporter activity	AT4G02050	0.012402	1	2
GO:MF	GO:0016798	hydrolase activity, acting on glycosyl bonds	AT1G02360,AT3G12500,AT3G23920,AT5G24090	0.0132771	4	471
GO:MF	GO:0016655	oxidoreductase activity, acting on NAD(P)H, quinone or similar compound as acceptor	AT5G54500,ATCG01010	0.0146419	2	52
GO:MF	GO:0008964	phosphoenolpyruvate carboxylase activity	AT2G42600	0.0154952	1	4
GO:MF	GO:0016830	carbon-carbon lyase activity	AT1G43710,AT2G42600	0.0161013	2	123
GO:MF	GO:0010427	abscisic acid binding	AT1G24020	0.0170357	1	18
GO:MF	GO:0008289	lipid binding	AT1G24020,AT1G44575	0.0170357	2	346
GO:MF	GO:0004611	phosphoenolpyruvate carboxykinase activity	AT2G42600	0.0196527	1	6
GO:MF	GO:0004864	protein phosphatase inhibitor activity	AT1G24020	0.0196527	1	23
GO:MF	GO:0019212	phosphatase inhibitor activity	AT1G24020	0.0206469	1	25
GO:MF	GO:0016491	oxidoreductase activity	AT1G07890,AT1G54870,AT1G76680,AT2G25060	0.0215405	4	1566
GO:MF	GO:0060229	lipase activator activity	AT3G62290	0.0225127	1	6
GO:MF	GO:0016004	phospholipase activator activity	AT3G62290	0.0225127	1	6
GO:MF	GO:0042562	hormone binding	AT1G24020	0.0233083	1	32
GO:MF	GO:0016651	oxidoreductase activity, acting on NAD(P)H	AT5G54500,ATCG01010	0.0246106	2	84
GO:MF	GO:0008753	NADPH dehydrogenase (quinone) activity	AT5G54500	0.0256938	1	5
GO:MF	GO:0043178	alcohol binding	AT1G24020	0.0256938	1	39
GO:MF	GO:0016161	beta-amylase activity	AT3G23920	0.0256938	1	9
GO:MF	GO:0102229	amylopectin maltohydrolase activity	AT3G23920	0.0256938	1	9
GO:MF	GO:0008878	glucose-1-phosphate adenylyltransferase activity	AT5G48300	0.0269048	1	6
GO:MF	GO:0004601	peroxidase activity	AT1G07890,AT4G36430	0.0286648	2	132
GO:MF	GO:0016160	amylase activity	AT3G23920	0.029658	1	12
GO:MF	GO:0019888	protein phosphatase regulator activity	AT1G24020	0.029658	1	51
GO:MF	GO:0019208	phosphatase regulator activity	AT1G24020	0.029658	1	53
GO:MF	GO:0016684	oxidoreductase activity, acting on peroxide as acceptor	AT1G07890,AT4G36430	0.029658	2	138
GO:MF	GO:0043295	glutathione binding	AT2G30870	0.0306179	1	19
GO:MF	GO:0016209	antioxidant activity	AT1G07890,AT4G36430	0.0344431	2	156
GO:MF	GO:0033293	monocarboxylic acid binding	AT1G24020	0.0350023	1	68
GO:MF	GO:0016829	lyase activity	AT1G43710,AT2G42600,AT5G14740	0.0416352	3	458
GO:MF	GO:0022829	wide pore channel activity	AT4G16160	0.0433706	1	17
GO:MF	GO:0008061	chitin binding	AT3G12500	0.0433706	1	24
GO:MF	GO:0015288	porin activity	AT4G16160	0.0433706	1	17
GO:MF	GO:0015267	channel activity	AT3G26520,AT4G16160	0.0433706	2	202
GO:MF	GO:0022803	passive transmembrane transporter activity	AT3G26520,AT4G16160	0.0433706	2	202
GO:MF	GO:0009055	electron transfer activity	AT2G25060,ATCG01010	0.0433706	2	143
GO:MF	GO:0004089	carbonate dehydratase activity	AT5G14740	0.0487786	1	18
GO:MF	GO:0030170	pyridoxal phosphate binding	AT1G43710	0.0487786	1	91
GO:MF	GO:0070279	vitamin B6 binding	AT1G43710	0.0487786	1	91
GO:MF	GO:0016628	oxidoreductase activity, acting on the CH-CH group of donors, NAD or NADP as acceptor	AT1G76680	0.0487786	1	52

## Sheet: Table S6
Table S6. Differential expressed transcript obtained by direct RNA method
gene_id	transcript_id	arabidopsis_id	log2FoldChange	pvalue	padj	Transcripts	L1_counts	L2_counts	L3_counts	L4_counts	W1_counts	W2_counts	W3_counts	W4_counts	description
CL.3787	evm.model.group1.2924	AT5G63500	-4.08934	5.51092e-24	2.19775e-20	DETs	47.3714	38.8195	54.2332	49.0917	1.88588	3.05496	1.48714	4.23196	transmembrane protein, putative (DUF 3339) [Source:NCBI gene (formerly Entrezgene);Acc:836469]
CL.21493	CL.21493.1	NA	-3.37482	2.19859e-14	4.384e-11	OtherRNA	36.8444	22.9388	36.1554	34.4503	1.88588	4.32785	0	5.07835	NA
CL.23265	evm.model.group5.1796	AT1G24020	1.79775	3.34393e-13	4.4452e-10	DETs	50.8804	70.5809	43.3865	53.398	216.877	151.22	258.019	144.733	MLP-like protein 423 [Source:NCBI gene (formerly Entrezgene);Acc:839014]
CL.21237	CL.21237.2	AT2G39050	-7.67027	8.16373e-13	8.13924e-10	DETs	26.3174	28.2324	18.0777	20.6702	0	0	0	0	hydroxyproline-rich glycoprotein family protein [Source:NCBI gene (formerly Entrezgene);Acc:818491]
CL.31846	CL.31846.1	NA	-2.38021	4.63006e-12	3.69294e-09	OtherRNA	49.1259	31.7614	61.4643	35.3116	4.71471	9.92861	5.20499	11.0031	NA
CL.19794	CL.19794.1	NA	-2.1642	1.32782e-11	8.10577e-09	DETs	75.4433	42.3486	36.1554	59.4268	11.3153	16.2931	6.69213	12.6959	NA
CL.27970	CL.27970.2	AT4G08770	1.44159	1.42278e-11	8.10577e-09	DETs	24.5629	42.3486	50.6176	34.4503	90.5224	99.2861	96.6642	104.106	Peroxidase superfamily protein [Source:NCBI gene (formerly Entrezgene);Acc:826447]
CL.31036	CL.31036.1	NA	-6.89104	4.16076e-11	2.07414e-08	DETs	33.3354	28.2324	7.23109	16.7945	0	0.25458	0	0	NA
CL.24835	CL.24835.1	NA	-6.81056	6.49904e-10	2.8798e-07	DETs	15.7905	14.1162	10.8466	11.1964	0	0	0	0	NA
CL.33350	CL.33350.1	AT3G12500	-2.39721	8.57965e-10	3.42156e-07	DETs	40.3534	28.2324	28.9244	53.8287	3.77177	6.10991	5.94856	15.2351	basic chitinase [Source:NCBI gene (formerly Entrezgene);Acc:820429]
CL.2593	CL.2593.1	AT4G16160	-5.35064	4.58433e-09	1.66203e-06	DETs	19.2994	7.05809	28.9244	17.6558	0.942942	0	0.74357	0.846392	Mitochondrial import inner membrane translocase subunit Tim17/Tim22/Tim23 family protein [Source:NCBI gene (formerly Entrezgene);Acc:827308]
CL.4378	evm.model.group1.3286	NA	-6.46026	2.45644e-08	8.16358e-06	DELs	10.527	1.76452	14.4622	13.3495	0	0	0	0	NA
CL.6999	CL.6999.1	NA	-6.21183	4.9814e-08	1.52814e-05	DETs	7.01798	10.5871	7.23109	8.61259	0	0	0	0	NA
CL.6621	evm.model.group11.247	NA	-6.16196	6.99461e-08	1.99246e-05	OtherRNA	8.77248	5.29357	10.8466	8.61259	0	0	0	0	NA
CL.2490	evm.model.group1.2091	NA	-6.15648	1.00062e-07	2.66031e-05	DETs	10.527	12.3517	3.61554	6.02881	0	0	0	0	NA
CL.28138	evm.model.group7.1404	AT1G47980	-6.13833	1.08884e-07	2.71394e-05	DETs	10.527	3.52905	14.4622	6.89007	0	0	0	0	desiccation-like protein [Source:NCBI gene (formerly Entrezgene);Acc:841216]
CL.15515	CL.15515.1	AT1G54870	-6.17336	1.42467e-07	3.15644e-05	DETs	14.036	8.82262	0	7.75133	0	0	0	0	NAD(P)-binding Rossmann-fold superfamily protein [Source:NCBI gene (formerly Entrezgene);Acc:841926]
CL.15515	evm.model.group3.1004	AT1G54870	-6.17336	1.42467e-07	3.15644e-05	DETs	14.036	8.82262	0	7.75133	0	0	0	0	NAD(P)-binding Rossmann-fold superfamily protein [Source:NCBI gene (formerly Entrezgene);Acc:841926]
CL.29541	evm.model.group8.402	AT2G31050	-5.93264	3.02414e-07	6.34752e-05	DETs	8.77248	5.29357	7.23109	6.89007	0	0	0	0	Cupredoxin superfamily protein [Source:NCBI gene (formerly Entrezgene);Acc:817657]
CL.14956	evm.model.group3.586	NA	-6.00471	3.20333e-07	6.38744e-05	OtherRNA	14.036	5.29357	3.61554	6.02881	0	0	0	0	NA
CL.6620	CL.6620.1	NA	-5.95944	5.35275e-07	0.000101651	DELs	12.2815	7.05809	0	6.89007	0	0	0	0	NA
CL.16402	evm.model.group3.1783	NA	-5.86263	5.96446e-07	0.000108119	OtherRNA	5.26349	3.52905	14.4622	6.45944	0	0	0	0	NA
CL.14955	CL.14955.1	AT5G44310	-5.83554	7.05925e-07	0.000122401	DETs	5.26349	10.5871	3.61554	6.02881	0	0	0	0	Late embryosis abundant protein (LEA) family protein [Source:NCBI gene (formerly Entrezgene);Acc:834454]
CL.13373	evm.model.group2.1824	AT1G47710	5.38508	7.83274e-07	0.000130154	DETs	0	0	0	0	5.65765	7.89197	15.615	16.9278	Serine protease inhibitor (SERPIN) family protein [Source:NCBI gene (formerly Entrezgene);Acc:841182]
CL.16392	CL.16392.1	NA	-5.87025	1.04157e-06	0.000166152	OtherRNA	1.7545	3.52905	14.4622	8.61259	0	0	0	0	NA
CL.29301	CL.29301.1	NA	-5.35224	3.47358e-06	0.000532794	OtherRNA	7.01798	7.05809	0	12.0576	0	0	0.74357	0	NA
CL.31845	CL.31845.1	NA	-2.00991	4.81684e-06	0.000711465	DETs	29.8264	24.7033	21.6933	37.8954	5.65765	12.9836	2.23071	5.92475	NA
CL.14960	evm.model.group3.589	AT5G44310	-5.61717	5.61015e-06	0.000799045	DETs	7.01798	5.29357	0	7.3207	0	0	0	0	Late embryosis abundant protein (LEA) family protein [Source:NCBI gene (formerly Entrezgene);Acc:834454]
CL.31034	evm.model.group8.1476	NA	-5.53038	5.89707e-06	0.000810949	OtherRNA	10.527	3.52905	3.61554	3.87566	0	0	0	0	NA
CL.18550	CL.18550.1	AT1G07890	1.97256	7.09645e-06	0.000943355	DETs	8.77248	5.29357	3.61554	6.02881	20.7447	28.0038	31.23	15.2351	ascorbate peroxidase 1 [Source:NCBI gene (formerly Entrezgene);Acc:837304]
CL.11525	CL.11525.2	NA	-5.06864	7.65776e-06	0.000955717	DETs	3.50899	5.29357	7.23109	8.18196	0	0	0.74357	0	NA
CL.26210	evm.model.group7.49	AT5G54500	1.70812	7.66874e-06	0.000955717	DETs	1.7545	17.6452	10.8466	9.47384	35.8318	25.458	40.1528	27.0846	flavodoxin-like quinone reductase 1 [Source:NCBI gene (formerly Entrezgene);Acc:835538]
CL.16751	CL.16751.1	NA	-5.12397	8.86374e-06	0.00107117	OtherRNA	10.527	10.5871	0	4.30629	0	0	0.74357	0	NA
CL.2642	CL.2642.1	AT1G76680	-2.65918	1.30361e-05	0.00152906	DETs	14.036	8.82262	7.23109	11.627	0.942942	2.5458	1.48714	0.846392	12-oxophytodienoate reductase 1 [Source:NCBI gene (formerly Entrezgene);Acc:844001]
CL.22718	CL.22718.1	AT5G24090	-5.28799	1.91172e-05	0.00217827	DETs	5.26349	5.29357	3.61554	3.87566	0	0	0	0	chitinase A [Source:NCBI gene (formerly Entrezgene);Acc:832474]
CL.25655	evm.model.group6.1364	NA	1.32917	2.13216e-05	0.00236196	OtherRNA	15.7905	10.5871	25.3088	23.6846	48.09	47.0972	34.2042	65.1722	NA
CL.21420	evm.model.group5.458	AT1G43710	-4.88766	2.38554e-05	0.00257123	DETs	7.01798	1.76452	7.23109	6.02881	0	0.25458	0	0	Pyridoxal phosphate (PLP)-dependent transferases superfamily protein [Source:NCBI gene (formerly Entrezgene);Acc:840958]
CL.8087	evm.model.group12.181	AT1G04560	-5.37936	2.67303e-05	0.00280528	DETs	0	5.29357	7.23109	6.45944	0	0	0	0	AWPM-19-like family protein [Source:NCBI gene (formerly Entrezgene);Acc:839491]
evm.TU.utg2036_2952540_3002010__.5	evm.model.utg2036_2952540_3002010__.5	AT3G22840	-5.17713	4.28706e-05	0.00438379	DETs	3.50899	7.05809	3.61554	3.0144	0	0	0	0	Chlorophyll A-B binding family protein [Source:NCBI gene (formerly Entrezgene);Acc:821855]
CL.14958	evm.model.group3.587	AT4G21020	-5.13427	4.97835e-05	0.00496341	DETs	5.26349	1.76452	7.23109	3.44503	0	0	0	0	Late embryosis abundant protein (LEA) family protein [Source:NCBI gene (formerly Entrezgene);Acc:827849]
CL.5034	CL.5034.3	AT2G05100	1.22242	6.76588e-05	0.00658106	DETs	28.0719	31.7614	36.1554	81.3889	114.096	105.396	129.381	99.8743	photosystem II light harvesting complex protein 2.1 [Source:NCBI gene (formerly Entrezgene);Acc:815058]
CL.12695	evm.model.group2.1430	NA	2.31575	7.5511e-05	0.00716995	DETs	1.7545	3.52905	7.23109	2.15315	12.2582	14.0019	10.41	19.467	NA
CL.27970	evm.model.group7.1255	AT4G08770	-7.79861	0.000114858	0.0106525	DETs	24.5629	42.3486	0	34.4503	0	0	0	0	Peroxidase superfamily protein [Source:NCBI gene (formerly Entrezgene);Acc:826447]
CL.29340	CL.29340.1	NA	-2.61075	0.000121896	0.0110482	OtherRNA	7.01798	10.5871	21.6933	10.7657	0	4.07328	0.74357	0.846392	NA
CL.4006	CL.4006.1	NA	-4.96229	0.000141217	0.012515	OtherRNA	5.26349	3.52905	3.61554	2.58378	0	0	0	0	NA
CL.5950	evm.model.group10.1144	NA	-4.56534	0.000154546	0.0133985	OtherRNA	8.77248	1.76452	3.61554	3.87566	0	0	0	0.846392	NA
CL.11372	CL.11372.2	AT5G01410	3.54346	0.000234521	0.0188529	DETs	3.50899	0	0	0	9.42942	5.85533	8.17927	7.61753	Aldolase-type TIM barrel family protein [Source:NCBI gene (formerly Entrezgene);Acc:831738]
CL.31285	CL.31285.2	NA	2.18489	0.00023226	0.0188529	DELs	0	5.29357	3.61554	2.58378	12.2582	14.511	9.66642	11.8495	NA
CL.33060	CL.33060.1	NA	1.36939	0.000236371	0.0188529	DELs	5.26349	8.82262	10.8466	17.6558	29.2312	39.2053	27.5121	28.7773	NA
CL.22702	CL.22702.1	NA	-4.52466	0.000251456	0.0196629	DELs	1.7545	3.52905	14.4622	2.15315	0	0.25458	0	0	NA
CL.22913	CL.22913.1	AT1G44575	1.20138	0.000266636	0.0204489	DETs	8.77248	21.1743	14.4622	17.6558	32.06	49.3885	32.7171	30.4701	Chlorophyll A-B binding family protein [Source:NCBI gene (formerly Entrezgene);Acc:841033]
CL.21025	CL.21025.1	NA	-2.19395	0.00028281	0.0208861	DELs	7.01798	5.29357	14.4622	9.90447	2.82883	1.52748	2.23071	1.69278	NA
CL.29341	CL.29341.1	NA	-3.86054	0.000282718	0.0208861	DELs	7.01798	3.52905	7.23109	4.73692	0	0.763739	0	0	NA
CL.31915	CL.31915.1	AT5G14740	-1.5634	0.000366744	0.0261174	DETs	14.036	12.3517	14.4622	22.8234	4.71471	7.63739	5.94856	3.38557	carbonic anhydrase 2 [Source:NCBI gene (formerly Entrezgene);Acc:831326]
CL.15081	CL.15081.1	NA	2.87731	0.000429778	0.0300694	DETs	3.50899	1.76452	0	0.430629	8.48648	8.40113	6.69213	11.0031	NA
CL.16407	CL.16407.1	NA	-4.75371	0.000496593	0.033231	OtherRNA	3.50899	1.76452	3.61554	3.44503	0	0	0	0	NA
CL.2489	CL.2489.1	AT3G23920	-2.21878	0.000492096	0.033231	DETs	14.036	10.5871	3.61554	6.89007	3.77177	1.01832	1.48714	2.53918	beta-amylase 1 [Source:NCBI gene (formerly Entrezgene);Acc:821975]
CL.25653	CL.25653.1	NA	1.28688	0.000499965	0.033231	OtherRNA	8.77248	5.29357	18.0777	10.7657	19.8018	29.5312	20.82	26.2382	NA
CL.5474	evm.model.group10.640	AT1G64780	2.36081	0.000545045	0.0356334	DETs	0	0	0	6.45944	19.8018	12.9836	14.8714	15.2351	ammonium transporter 1;2 [Source:NCBI gene (formerly Entrezgene);Acc:842786]
CL.29541	CL.29541.2	AT2G25060	-4.7991	0.000588898	0.0372782	DETs	0	5.29357	7.23109	2.15315	0	0	0	0	early nodulin-like protein 14 [Source:NCBI gene (formerly Entrezgene);Acc:817044]
CL.4379	CL.4379.3	NA	-4.69683	0.000584285	0.0372782	OtherRNA	1.7545	3.52905	7.23109	1.72252	0	0	0	0	NA

## Sheet: Table S7
Table S7. Expression count transcript values for 8 short read RNA-seq libraries
gene_id	transcript_id	log2FoldChange	pvalue	padj	L1_counts	L2_counts	L3_counts	L4_counts	W1_counts	W2_counts	W3_counts	W4_counts
CL.33350	evm.model.utg2157_1174894_1545155__.8	-3.61215	1,12337073590775e-77	4,50134653878234e-73	18093.8	18139	19706.9	29032.1	1525.73	1797.99	1953.16	1673.86
CL.21420	evm.model.group5.458	-5.33185	9,47024805895846e-76	1,89736419861233e-71	25087.2	31481.2	37323.3	46949.4	762.43	1274.43	597.143	859.924
CL.21490	evm.model.group5.525	-5.05572	5,73976740471674e-61	7,66641599689999e-57	2684.68	4606.82	4258.36	4902.2	100.32	92.1519	186.607	118.905
CL.19054	evm.model.group4.935	1.13196	1,13083933427156e-60	1,13281830310654e-56	31649.5	30742.4	29626.1	28695.7	70298	66311.2	60693	67223.2
CL.29301	CL.29301.1	-6.94302	7,7350163335044e-60	6,19884208967042e-56	8927.41	12248.9	10390.8	11059.8	39.2556	161.095	93.9948	51.8976
CL.20737	evm.model.group5.96	-3.16233	4,58296302995921e-59	3,06065547684109e-55	4586.4	6514.67	5793.01	5602.07	592.323	499.668	807.249	618.83
CL.27722	CL.27722.2	2.91208	4,32623333525747e-55	2,4764595677681e-51	217.939	254.096	316.98	234.674	1977.61	1959.08	2199.2	1604.23
CL.20907	evm.model.group5.182	4.14073	2,84045607169152e-52	1,42271343490849e-48	238.925	192.173	156.171	147.45	2467.87	3634.2	4260.18	2550.21
CL.33272	CL.33272.1	-1.77097	1,66886400341809e-46	7,43015340188475e-43	1685.39	2025.29	1864	1857.67	587.961	532.433	469.974	583.356
CL.23287	CL.23287.1	6.65843	1,22481018795332e-44	4,90781442312894e-41	75.8749	46.9757	99.7328	59.1878	8318.69	10639.8	7254.19	2286.78
CL.3354	CL.3354.1	-1.82758	1,37705212699339e-44	5,01622533896592e-41	4347.47	5331.74	5743.53	5657.1	1387.9	1597.98	1373.98	1577.29
CL.17187	CL.17187.1	-1.66626	2,71310669792085e-44	9,05951544880737e-41	2140.64	2477.97	2565.22	2150.49	733.643	696.259	693.903	815.91
CL.29760	CL.29760.1	1.64858	2,9337751003415e-41	9,04279755928338e-38	1178.48	1018.52	1158.14	1122.49	3682.17	3505.19	3885.58	2968.02
CL.4322	CL.4322.1	2.39242	1,19523532814766e-40	3,42093425706261e-37	608.614	612.819	602.262	554.496	3780.75	2995.28	3369.99	2341.96
CL.32230	CL.32230.1	-11.9814	4,32218634082163e-38	1,15460004451149e-34	1314.09	2259.1	3312.06	2963.54	0	1.36521	0	0.656932
CL.5950	evm.model.group10.1144	-5.50606	4,81602875897417e-38	1,20611420232559e-34	31549.4	48422.3	78814.4	51962.7	721.43	656.668	1192.9	2066.05
CL.19794	CL.19794.1	-6.24024	2,02708468416475e-36	4,77795784085185e-33	31328.3	42185.2	38810	39331.8	165.746	534.481	1018.74	289.707
CL.33987	CL.33987.2	-3.48584	5,51650717388463e-36	1,22803579143087e-32	1307.63	944.852	1451.92	841.089	74.1494	112.63	109.2	109.708
CL.9448	CL.9448.1	3.72721	3,81241067248494e-35	7,63816478232358e-32	169.508	195.376	265.954	136.028	2536.78	1972.73	3546.92	2127.8
CL.5474	evm.model.group10.640	2.16351	3,74924955191286e-35	7,63816478232358e-32	3640.38	2414.98	3774.38	2640.61	13324.2	14298.6	14032.9	14206.8
CL.33350	CL.33350.1	-3.89011	2,55768719867048e-32	4,8803107643203e-29	1841.99	3412.14	3166.71	3508.69	157.895	158.365	311.012	180.656
CL.12887	CL.12887.1	-5.37693	2,7399895155551e-31	4,99051726764968e-28	4407.2	8309.36	10023.5	7881.32	88.9793	120.821	176.931	349.488
CL.21493	CL.21493.1	-6.48559	5,30096400020582e-31	9,23520119514118e-28	22197.5	28531.3	25922.8	27397.7	51.4684	298.982	565.351	247.006
CL.31915	CL.31915.1	-3.65459	1,04131400317988e-30	1,73856050447575e-27	5180.48	3230.65	3703.26	4507.62	334.981	174.065	428.506	384.305
CL.4967	evm.model.group10.353	-2.28238	4,01442430259774e-30	6,43431927220366e-27	1827.46	2693.63	2099.03	2578.3	370.747	505.812	490.708	523.575
CL.2369	evm.model.group1.1968	-1.96728	2,51700862620253e-29	3,87909752507444e-26	1641.8	1847	1468.16	1632.34	332.364	401.373	456.151	495.327
CL.4379	CL.4379.1	-8.23932	2,88413749661101e-29	4,2802736847853e-26	7408.3	10237.5	12756.5	3031.04	20.9363	2.73043	58.0556	30.2189
CL.12180	CL.12180.1	3.44883	5,80722606463191e-29	8,31055530035003e-26	53.2739	88.6132	92.7747	53.9959	625.472	921.519	686.991	940.07
CL.16110	CL.16110.5	3.71743	1,96777226635861e-28	2,71891843837895e-25	62.9601	150.536	128.338	100.723	996.219	1565.9	1495.62	1794.74
CL.24255	CL.24255.1	1.95186	3,12620519860869e-28	4,17556807694167e-25	626.372	605.346	794.77	682.217	2270.72	2234.17	3010.6	2977.87
CL.27385	evm.model.group7.901	0.766081	3,40948295624724e-28	4,40703167925249e-25	9531.18	8605.09	9650.11	8806.52	15389.9	14874.7	15399.9	16561.9
CL.24589	evm.model.group6.619	-8.23267	6,63140564605955e-28	8,3037632574252e-25	364.845	253.028	433.722	643.797	0	1.36521	1.38228	2.62773
CL.12613	evm.model.group2.1313	-1.43913	1,69165179699251e-27	2,05407537895424e-24	853.997	780.437	766.937	764.249	263.448	298.299	270.926	329.78
CL.15989	CL.15989.1	-0.955865	1,8570167380803e-27	2,18854884396698e-24	3286.84	3422.82	3108.73	3148.37	1850.25	1555.66	1622.79	1654.81
CL.6785	evm.model.group11.334	-2.73268	2,31649178885066e-27	2,6520521708356e-24	1664.41	1920.67	1301.16	1500.46	320.151	219.117	250.192	172.773
CL.8071	evm.model.group12.175	-11.6585	8,87691702024333e-27	9,88050180558751e-24	361.617	503.921	620.044	552.419	0	0	0	0
CL.4382	evm.model.group1.3288	-13.8652	1,24674181103295e-26	1,35018768562406e-23	3646.84	1699.67	3636.77	431.967	0	0	0	0
CL.11521	evm.model.group2.575	-1.24207	2,56624225353635e-26	2,7060349236632e-23	4069.8	4112.51	3694.75	3875.24	1651.35	1402.07	1755.49	1851.89
CL.21419	CL.21419.1	-12.0363	1,128618653834e-25	1,15958331946483e-22	506.909	1075.1	422.125	645.874	0	0	0	0
CL.11766	CL.11766.1	1.30687	2,63138252247865e-25	2,63598744189299e-22	26344.7	19775.7	19757.9	19018	53006.3	51056.9	51933.5	54014.3
CL.2490	evm.model.group1.2091	-6.62146	2,81372274105438e-25	2,74989927400119e-22	10086.5	20566.8	40006.8	14570.6	74.1494	95.565	223.929	471.677
CL.23888	CL.23888.1	-5.92965	6,95009075407805e-25	6,63071753609303e-22	1041.26	944.852	3743.46	1010.35	20.064	33.4477	38.7037	19.051
CL.9463	CL.9463.1	2.80484	1,17299494533469e-24	1,09306761533863e-21	469.779	629.901	532.681	326.052	3710.96	3899.05	3743.2	2336.71
CL.18957	CL.18957.2	1.37604	1,2394889852793e-23	1,12878008273049e-20	757.135	539.153	679.575	613.684	1718.52	1642.35	1737.52	1614.08
CL.15053	CL.15053.1	2.67642	2,0110454719499e-23	1,79072426802295e-20	1039.65	1889.7	2038.72	1056.03	9724.91	8885.49	10722.3	9202.96
CL.9918	CL.9918.1	2.03387	2,38978722724679e-23	2,08171248251693e-20	217.939	186.835	246.626	202.484	799.941	949.506	1046.38	707.516
CL.31976	evm.model.group9.424	-3.1557	2,56443279702506e-23	2,18631536546371e-20	871.755	1495.75	896.049	886.778	122.128	119.456	74.6429	147.153
CL.18811	CL.18811.7	1.76813	4,03447087775749e-23	3,3679426681613e-20	133.992	146.265	163.129	173.41	475.428	486.016	548.764	599.779
CL.90	evm.model.group1.79	-1.5285	1,06074116181741e-22	8,67426497020893e-20	565.026	492.177	529.589	642.758	197.15	201.369	176.931	195.109
CL.11521	CL.11521.1	-1.68751	1,10656574711387e-22	8,86801789737057e-20	2026.02	2748.08	2564.45	2416.31	937.772	715.372	680.08	695.691
CL.4526	evm.model.group1.3421	3.27347	1,40133074308601e-22	1,1010063308913e-19	1025.12	665.133	1856.27	896.124	8842.1	9590.63	11099.7	13447.4
CL.2593	CL.2593.1	-2.87707	2,29984008911439e-22	1,77220369943873e-19	3262.62	4054.86	5100.29	3996.73	421.343	433.455	505.913	872.406
CL.30271	CL.30271.1	1.41952	4,16537753624178e-22	3,14918260145676e-19	1640.19	1204.29	1306.58	1362.36	3775.51	4032.84	3799.88	3126.34
CL.24604	CL.24604.1	-5.03519	5,14186908265273e-22	3,81410218633562e-19	1604.67	2294.34	3506.88	954.273	38.3832	35.4956	91.2302	90.6566
CL.3979	evm.model.group1.3049	-3.71568	5,23522885571398e-22	3,81410218633562e-19	7057.98	5628.54	6076.74	3975.96	190.171	469.634	403.625	666.129
CL.5920	CL.5920.1	-2.45701	6,79703365279136e-22	4,8635203297741e-19	1866.2	3660.9	3591.93	3147.34	558.301	509.225	663.493	505.838
CL.31381	CL.31381.1	-2.13629	2,92393136804882e-21	2,05547245469678e-18	4633.21	5810.04	4602.4	5285.36	1007.56	1514.02	811.396	1286.93
CL.18326	evm.model.group4.416	-2.82839	3,13562568139408e-21	2,16628484574932e-18	5027.12	7938.89	5789.91	3957.27	512.939	1022.55	783.751	877.661
CL.25915	CL.25915.1	-2.15928	5,5318090840432e-21	3,75694220334934e-18	1331.85	1723.15	1964.5	1605.34	323.64	300.347	367.686	491.385
CL.15137	CL.15137.1	10.8329	1,29616745273961e-20	8,65623830521266e-18	0	0	0	0	542.599	280.551	405.007	227.955
CL.28912	evm.model.group7.1872	0.852023	1,48462870664704e-20	9,75230693038474e-18	1209.16	1305.71	1440.33	1270.98	2234.95	2311.99	2417.6	2484.52
CL.11822	CL.11822.1	-10.7595	1,54968270437724e-20	1,00154493490961e-17	355.159	336.303	232.71	170.295	0	0	0	0
CL.29195	CL.29195.1	2.43729	1,68238764032465e-20	1,07005194837792e-17	1777.41	1166.92	1446.51	1132.87	7430.64	7615.16	9952.39	4911.22
CL.28924	evm.model.group7.1882	-10.7202	2,35587084108336e-20	1,47499600940954e-17	261.526	190.038	214.155	398.739	0	0	0	0
CL.30781	CL.30781.1	-5.74009	2,97638506804561e-20	1,83482691810135e-17	2599.12	5457.72	10857.7	3509.73	47.979	42.3216	142.374	187.226
CL.30872	evm.model.group8.1390	0.924828	3,7477663782006e-20	2,27534846628027e-17	4026.21	4128.52	4457.05	3774.52	7145.38	7326.42	7974.35	8668.88
CL.6874	CL.6874.1	-10.6869	4,41568915975397e-20	2,64084574076629e-17	214.71	214.593	404.343	205.6	0	0	0	0
CL.1318	CL.1318.2	1.13178	7,07442071901655e-20	4,16870644427931e-17	987.989	1021.72	1024.39	1009.31	2221.86	2447.15	2360.93	1836.13
CL.80	evm.model.group1.77	-1.85499	1,27027987307941e-19	7,37682819047708e-17	1467.45	2038.1	1597.27	1355.09	379.47	451.203	544.617	413.21
CL.7173	CL.7173.1	11.2079	1,38602372285753e-19	7,93399579641448e-17	0	0	0	0	643.791	330.382	716.019	198.394
CL.945	CL.945.2	-10.5232	1,53992381767952e-19	8,69080948935471e-17	339.016	233.811	158.49	198.331	0	0	0	0
CL.20662	evm.model.group5.56	1.31445	4,66635505551476e-19	2,59695620936773e-16	713.547	566.911	674.163	528.536	1463.8	1690.13	1444.48	1568.1
CL.29308	CL.29308.1	-11.7509	5,547017717151e-19	3,04478082090741e-16	153.364	1054.82	550.463	415.353	0	0	0	0
CL.29765	evm.model.group8.494	-10.9751	6,29623951182181e-19	3,40932861133378e-16	521.438	266.907	337.081	145.373	0	0	0	0
CL.32223	CL.32223.1	-3.43356	8,13205579279771e-19	4,28751941601847e-16	2463.51	998.233	948.621	1001	124.745	135.839	111.964	127.445
CL.23	evm.model.group1.19	2.77653	8,04455512644539e-19	4,28751941601847e-16	763.592	1178.66	1111.75	1010.35	6623.72	8603.58	8993.09	3642.69
CL.5945	CL.5945.1	-11.7897	9,94059084883928e-19	5,17298019887e-16	1217.23	187.903	354.09	475.579	0	0	0	0
CL.23187	CL.23187.1	2.204	1,19516100893869e-18	6,1397566189966e-16	222.782	267.975	291.467	321.898	1016.28	1262.82	1071.26	1743.5
CL.28438	CL.28438.1	1.82798	1,23509382904174e-18	6,26458351008894e-16	2707.28	3968.38	5336.09	4246.98	14426.9	14669.2	13826.9	14825
CL.2671	CL.2671.13	9.94753	2,04172853326848e-18	1,02265077910085e-15	0	0	0	0	166.618	159.73	265.397	197.08
CL.31381	evm.model.group9.57	-1.9206	2,76008939305827e-18	1,36539237012154e-15	6543	9383.39	7461.4	9040.15	1979.35	2766.61	1560.59	2255.25
CL.27768	CL.27768.1	-9.50093	2,92989914263719e-18	1,43172022738381e-15	297.042	707.838	1237.77	490.116	0	0	0	3.28466
CL.21606	evm.model.group5.608	1.81803	3,34717410663243e-18	1,61591887292484e-15	32619.8	41640.7	34735.6	27903.4	124708	132056	82897.9	143043
CL.34844	evm.model.utg87_2701784_3545125__.21	2.42398	3,69212504249673e-18	1,76123155301005e-15	306.728	254.096	332.443	181.717	1694.1	1097.63	1726.46	1252.11
CL.17316	CL.17316.1	-1.62991	4,49897127710397e-18	2,12086798910066e-15	21036.7	21807.4	17406.9	20374.1	6684.79	6063.6	4857.32	8438.95
CL.31908	evm.model.group9.375	-3.11803	4,88724140727109e-18	2,27711352545759e-15	2804.14	1443.43	1164.32	1642.72	289.619	186.352	158.962	176.715
CL.24760	CL.24760.1	-3.70152	5,32837668015862e-18	2,45411555832133e-15	907.271	1308.91	1168.19	735.174	38.3832	64.8477	81.5543	131.386
CL.30080	CL.30080.1	10.3619	6,18829508636859e-18	2,81778391034988e-15	0	0	0	0	391.683	238.23	281.984	138.613
CL.32610	evm.model.group9.873	-2.66987	6,3258505746429e-18	2,84805429804428e-15	8047.59	11221.9	11589.9	8748.37	1014.54	1059.41	2163.26	1989.19
CL.12058	CL.12058.1	10.3068	7,83108405494506e-18	3,48657264535165e-15	0	0	0	0	387.322	184.304	157.58	281.167
CL.33806	CL.33806.4	-4.8175	8,80190889552895e-18	3,87574164224005e-15	895.97	499.65	817.19	342.666	36.6385	10.9217	31.7924	12.4817
CL.2299	CL.2299.1	-4.83622	1,22457125221279e-17	5,33354022567026e-15	836.239	890.403	1154.27	916.891	67.1706	37.5434	9.67593	17.7372
CL.14362	CL.14362.1	10.6591	1,37704550186259e-17	5,93314121071334e-15	0	0	0	0	451.003	449.155	132.699	256.86
CL.24623	CL.24623.1	-1.13643	1,83133981640278e-17	7,80657302587866e-15	4502.45	5257.01	5238.68	4861.7	2096.25	2347.48	1932.42	2652.69
CL.32525	CL.32525.3	1.53534	1,8631929411926e-17	7,85875170037765e-15	3558.05	2801.46	2964.92	2878.39	6579.23	8441.8	9974.51	10367
CL.25798	evm.model.group6.1438	-2.79427	2,2091392514707e-17	9,22085518816989e-15	479.465	510.327	988.824	503.615	85.4899	90.1041	84.3189	97.8829
CL.27768	evm.model.group7.1066	-9.67681	2,44047248307715e-17	1,00814157110208e-14	1138.12	1802.16	2616.25	1381.05	0	0	0	7.88319
CL.15267	CL.15267.1	-10.8006	2,9695301699656e-17	1,21417422357675e-14	208.252	112.101	424.444	380.048	0	0	0	0
CL.4322	evm.model.group1.3260	2.25368	3,45269531322866e-17	1,39746970910174e-14	473.008	430.255	313.888	294.9	2395.46	1845.77	1567.5	1388.75
CL.30921	evm.model.group8.1405	-1.75228	4,00334304065984e-17	1,6041395563924e-14	8286.51	12451.8	8740.92	14381.6	3464.96	3005.52	3269.08	3280.72
CL.14958	evm.model.group3.587	-3.95398	4,39118294181826e-17	1,74212574731344e-14	36616.9	42699.8	81119.1	37344.4	1797.9	1572.73	3497.16	5894
CL.6646	CL.6646.1	-11.5833	4,80089719764789e-17	1,88599951676226e-14	702.247	859.442	254.357	120.452	0	0	0	0
CL.7685	evm.model.group11.1069	-5.80687	7,81934304356545e-17	3,0419521918026e-14	1100.99	1159.45	2872.15	1011.38	17.4469	5.46085	59.4379	28.905
CL.15791	CL.15791.4	9.48264	7,98994955625237e-17	3,07843537229839e-14	0	0	0	0	156.15	161.095	109.2	143.868
CL.21339	evm.model.group5.420	-2.2525	8,56705316395974e-17	3,26935066933206e-14	12952	20371.4	26321.7	14775.1	3820.87	4133.18	2909.69	4752.25
CL.17626	evm.model.group3.2647	-1.93927	8,93205160541775e-17	3,37648403612348e-14	4849.54	8022.17	9067.95	7456.62	1806.63	1572.73	1960.07	2326.85
CL.29300	CL.29300.1	10.0768	1,0623270316356e-16	3,97826580912511e-14	0	0	0	0	172.724	336.525	125.787	225.985
CL.34308	evm.model.utg602_4869710_4942748__.1	-2.97602	1,11927473884363e-16	4,15271655420965e-14	246.997	197.511	182.457	128.759	24.4257	22.526	30.4101	19.708
CL.7835	CL.7835.1	2.10386	1,18749620367567e-16	4,36541035608111e-14	59.7313	70.4635	85.8166	103.838	374.236	365.877	348.334	296.933
CL.24075	evm.model.group6.354	-2.49003	1,23618583615737e-16	4,50308785952963e-14	1175.25	1124.21	839.611	1636.49	151.788	199.321	223.929	274.598
CL.19598	evm.model.group4.1245	-1.05191	1,45615164255139e-16	5,25657624477784e-14	7201.66	5781.21	7633.81	6297.79	2891.83	3236.24	3372.75	3481.08
CL.7989	CL.7989.2	-2.66092	2,09146513752587e-16	7,48259000541622e-14	7154.85	7971.99	5092.56	5189.83	760.686	1651.23	830.748	773.209
CL.12302	CL.12302.1	-2.14041	2,72240028504056e-16	9,65367959482967e-14	1578.84	1833.12	1685.41	1327.05	410.875	351.543	228.076	463.137
CL.31383	evm.model.group9.58	-1.8744	2,80378947559593e-16	9,85507406027447e-14	2763.78	2678.68	2306.22	2769.36	616.748	935.171	501.766	809.997
CL.27170	CL.27170.1	0.782611	2,93885436301443e-16	1,02399908109555e-13	1246.29	1405	1338.27	1293.82	2137.25	2416.43	2106.59	2427.36
CL.3687	CL.3687.1	-2.24092	3,15248683259169e-16	1,08896678777542e-13	5918.25	5027.47	4924.02	4663.37	1099.16	959.063	677.315	1604.23
CL.24619	evm.model.group6.636	-5.09854	3,41200087095605e-16	1,16853739230093e-13	15331.6	29807.1	62489.2	25057.2	246.002	550.864	1320.07	1755.98
CL.12069	CL.12069.1	1.59144	3,70998063574527e-16	1,25982139046028e-13	576.327	470.824	494.025	462.08	1833.67	1519.48	1542.62	1135.84
CL.17524	CL.17524.3	-1.28145	3,79889543086673e-16	1,27917428499857e-13	1149.42	986.489	1048.35	1159.87	406.513	475.777	378.744	520.29
CL.22220	CL.22220.3	-4.641	4,77796931791163e-16	1,59544358807266e-13	364.845	588.264	533.454	772.556	23.5533	41.639	5.52911	18.3941
CL.30640	CL.30640.1	-2.66573	5,84245492531856e-16	1,93476999055797e-13	768.436	614.954	898.368	567.995	136.958	70.9911	93.9948	146.496
CL.20704	CL.20704.2	9.67241	6,67968390091334e-16	2,19389290089834e-13	0	0	0	0	168.363	224.578	160.344	97.8829
CL.22702	CL.22702.1	-2.90171	7,34318918219756e-16	2,39220805309476e-13	981.531	1267.28	1340.59	758.019	169.235	92.8345	212.871	109.708
CL.33185	CL.33185.1	-3.3569	7,66227929219234e-16	2,47602847772699e-13	111.391	105.695	104.372	105.915	9.5958	8.87389	17.9696	7.22625
CL.29672	evm.model.group8.456	1.28785	8,97856760067089e-16	2,87816963007106e-13	10367.4	8920.04	11436	11594.6	30362.9	20450.9	24748.3	27767.2
CL.2575	evm.model.group1.2171	-3.0539	1,18474710913324e-15	3,76768386214039e-13	634.444	357.656	743.744	833.821	96.8304	65.5303	95.3771	53.2115
CL.17803	CL.17803.4	9.3597	1,54963494444585e-15	4,889281277476e-13	0	0	0	0	88.1069	142.665	142.374	151.094
CL.27437	CL.27437.1	11.6989	1,61878659383065e-15	5,0675608449058e-13	0	0	0	0	1228.26	77.8172	955.153	392.188
CL.12487	evm.model.group2.1260	2.44362	1,76142395095266e-15	5,471337807339e-13	41.9734	41.6375	65.7154	50.8807	237.278	311.951	219.782	327.809
CL.15697	CL.15697.1	-2.70086	1,81050596446705e-15	5,58053646124576e-13	9405.26	14342.5	12641.3	12440.9	2134.63	896.263	2768.7	1713.94
CL.13764	CL.13764.1	-3.50678	1,8410656795626e-15	5,58875013485405e-13	2084.14	2096.82	3652.23	1412.2	163.129	99.6606	298.572	253.576
CL.15901	CL.15901.1	-4.53437	1,83464476987705e-15	5,58875013485405e-13	130.763	113.169	70.3541	71.6483	2.61704	4.77825	5.52911	3.94159
CL.21046	evm.model.group5.256	-0.588285	2,38051827892922e-15	7,17198251403712e-13	55245	49858.3	50501.9	54548.3	36426.5	31757.6	35466.4	36128
CL.8169	evm.model.group12.261	-1.11731	3,00252405971166e-15	8,9784432143766e-13	1528.8	1794.68	1748.8	1882.59	919.452	802.063	674.551	807.37
CL.4382	CL.4382.3	-10.4856	3,04655020144629e-15	9,04261233866318e-13	1599.83	2466.22	6706.06	576.302	0	7.50868	0	0
CL.21704	evm.model.group5.646	-0.77109	3,16028488368343e-15	9,31122171244081e-13	30474.3	35816.8	36880.3	37054.7	20378	20171	19080.9	22538.7
CL.21752	CL.21752.8	1.5753	3,24060379133516e-15	9,47817473859853e-13	335.787	382.211	449.184	293.862	960.453	1028.69	1288.28	1087.22
CL.19251	evm.model.group4.1022	-10.8017	3,50189653828521e-15	1,01681879919629e-12	555.34	100.357	151.532	319.822	0	0	0	0
CL.20643	evm.model.group5.49	-9.59879	3,89952667132349e-15	1,12412973899232e-12	184.037	106.763	88.136	111.107	0	0	0	0
CL.31635	evm.model.group9.156	-0.917358	3,93905715069699e-15	1,12741442877449e-12	3135.09	3300.04	3174.44	2837.9	1417.56	1646.45	1675.32	1849.92
CL.31036	CL.31036.1	-4.95149	4,07978221566863e-15	1,15941044951661e-12	968.616	1620.66	4759.34	1361.32	70.66	23.8912	106.435	81.4596
CL.16947	evm.model.group3.2256	-0.418071	5,17177198178396e-15	1,45938664302876e-12	30827.8	32581.9	33064.9	32242.8	23728.7	25246.9	22800.6	24552.8
CL.23839	CL.23839.3	9.30547	5,84790788184321e-15	1,63864104073746e-12	0	0	0	0	181.448	109.9	106.435	107.08
CL.18788	CL.18788.1	1.00141	7,21209979263855e-15	2,00686693535435e-12	5459.77	4646.32	5142.04	3983.23	9294.84	10365.4	10024.3	8810.12
CL.33342	evm.model.utg2157_1174894_1545155__.3	9.51954	9,18303969365571e-15	2,53768552086058e-12	0	0	0	0	190.171	117.408	87.0834	190.51
CL.25662	evm.model.group6.1367	1.18915	9,63582811509162e-15	2,64457282583371e-12	997.675	794.316	761.526	785.017	1605.12	1884.68	2066.5	2044.37
CL.32959	evm.model.group9.1271	-26.0196	1,47066363533398e-14	4,00880897060085e-12	0	1640.95	0	464.157	0	0	0	0
CL.11816	CL.11816.2	9.46628	1,54690746029021e-14	4,16657287129613e-12	0	0	0	0	227.682	105.804	113.347	117.591
CL.5952	CL.5952.1	-10.3303	1,54933705471206e-14	4,16657287129613e-12	301.885	314.951	97.4134	98.6463	0	0	0	0
CL.11729	evm.model.group2.661	-25.9676	1,65848290976887e-14	4,37206646016043e-12	1801.63	0	224.205	0	0	0	0	0
CL.19653	evm.model.group4.1277	-1.92137	1,6530219106685e-14	4,37206646016043e-12	3958.41	4675.15	5414.18	4340.44	993.602	1469.65	826.601	1560.87
CL.29760	evm.model.group8.492	1.74024	1,64768670857267e-14	4,37206646016043e-12	758.749	1290.76	1387.75	1057.07	3917.7	3559.11	4336.2	3220.94
CL.31846	CL.31846.1	-2.1657	1,72561433336759e-14	4,51930498941435e-12	40970.9	66409.7	58539.3	72997.2	8192.2	18159.4	14150.4	12746.5
CL.15111	CL.15111.1	-25.9293	1,8114685055594e-14	4,71334694920553e-12	1727.37	0	258.996	0	0	0	0	0
CL.5085	CL.5085.1	-2.43368	2,63387880946879e-14	6,80900154163964e-12	884.669	819.939	1121.8	748.673	112.533	121.504	225.311	204.306
CL.24825	evm.model.group6.771	1.13129	2,65829863182092e-14	6,82807860109387e-12	639.287	479.366	603.809	551.381	1136.67	1159.07	1304.87	1376.27
CL.23176	CL.23176.3	-9.80848	3,44212962337307e-14	8,72950215244044e-12	182.423	92.8837	212.609	77.8786	0	0	0	0
CL.26059	evm.model.group6.1665	1.64172	3,43128739092996e-14	8,72950215244044e-12	2431.23	3948.09	3675.42	4210.64	11835.1	12633.7	8615.73	11438.5
CL.3838	CL.3838.1	-9.5568	3,56338608306785e-14	8,98018115399551e-12	129.149	116.372	166.221	63.3413	0	0	0	0
CL.15096	CL.15096.1	-1.01879	3,81931653141162e-14	9,56500083835398e-12	692.561	679.012	599.17	775.671	355.917	336.525	328.982	332.408
CL.28289	evm.model.group7.1498	-0.625339	3,88243118665543e-14	9,66267190368218e-12	5041.65	5167.33	5170.64	4907.39	3406.51	3155.69	2987.1	3594.08
CL.7581	evm.model.group11.992	-25.5085	4,74213519827422e-14	1,17294665058548e-11	0	262.637	0	1184.79	0	0	0	0
CL.16178	CL.16178.1	2.13924	5,08779673323717e-14	1,2507240190234e-11	957.316	438.796	909.192	650.027	2640.59	3584.37	3170.94	3617.07
CL.31041	evm.model.group8.1478	-4.6828	6,43726489461532e-14	1,57281222150754e-11	5362.91	7916.47	12332.1	5795.21	66.2983	250.517	221.164	683.866
CL.15468	CL.15468.1	-25.3609	6,62125614357604e-14	1,60796202226116e-11	0	237.014	0	1062.26	0	0	0	0
CL.28852	evm.model.group7.1848	-2.49736	6,87728524678924e-14	1,66007722794485e-11	987.989	1822.44	1866.32	2128.68	366.385	302.395	187.99	346.86
CL.30214	CL.30214.1	-25.3231	7,21071500822359e-14	1,72396570235021e-11	703.861	560.505	0	0	0	0	0	0
CL.5291	CL.5291.1	-25.322	7,22800693772984e-14	1,72396570235021e-11	1084.85	212.458	0	0	0	0	0	0
CL.25974	CL.25974.1	-25.3165	7,31988325615915e-14	1,7355486513272e-11	1042.88	0	0	217.022	0	0	0	0
CL.15722	CL.15722.1	-25.3076	7,46791789960445e-14	1,76023217786559e-11	758.749	0	0	491.155	0	0	0	0
CL.34441	evm.model.utg648_1_401008__.1	-2.44111	8,76800422547586e-14	2,054584381958e-11	1081.62	1336.67	610.767	948.043	184.065	236.182	129.934	179.999
CL.5134	CL.5134.1	-25.2277	8,93763781416317e-14	2,08215783263673e-11	721.619	456.945	0	0	0	0	0	0
CL.3315	CL.3315.1	-25.2232	9,02747661557272e-14	2,09093056639306e-11	797.494	385.414	0	0	0	0	0	0
CL.19668	CL.19668.1	-25.2158	9,17871648760459e-14	2,11374235435814e-11	886.284	0	282.19	0	0	0	0	0
CL.4127	CL.4127.1	-25.1585	1,04379861312511e-13	2,39000059588133e-11	841.082	0	282.19	0	0	0	0	0
CL.22161	CL.22161.1	-25.1481	1,06827324896888e-13	2,43214256171494e-11	916.957	0	195.6	0	0	0	0	0
CL.10713	CL.10713.1	-25.1369	1,09546571578414e-13	2,47996108652375e-11	682.874	425.984	0	0	0	0	0	0
CL.11651	evm.model.group2.624	1.31803	1,12428489769312e-13	2,53090426126760e-11	1167.18	1023.86	923.881	783.978	2296.89	2068.3	2595.92	2750.57
CL.26337	evm.model.group7.175	-1.7422	1,15219546206949e-13	2,5792442550349e-11	3107.64	4463.76	3492.97	3025.84	1403.6	810.254	915.067	1082.62
CL.9962	CL.9962.1	-25.1044	1,17796111734857e-13	2,62227233178651e-11	834.624	0	241.987	0	0	0	0	0
CL.6349	CL.6349.1	9.88341	1,21467889852461e-13	2,68907090960669e-11	0	0	0	0	204.129	309.904	64.967	174.087
CL.3690	CL.3690.7	-2.58705	1,24717380163522e-13	2,7458381445892e-11	7816.73	5831.39	4506.53	8880.24	1646.99	630.729	986.945	1234.38
CL.28676	CL.28676.1	9.18658	1,29576114528241e-13	2,83722126182876e-11	0	0	0	0	82.0005	137.887	82.9366	161.605
CL.31039	CL.31039.1	-25.0488	1,33381492154319e-13	2,90467195142586e-11	763.592	272.245	0	0	0	0	0	0
CL.2062	CL.2062.1	-25.0449	1,34551006017708e-13	2,91430206007003e-11	920.185	0	110.557	0	0	0	0	0
CL.31041	CL.31041.2	-5.07183	1,37804089161216e-13	2,96871497456448e-11	1709.61	2579.39	4099.87	2127.64	43.6173	12.9695	91.2302	164.89
CL.26040	evm.model.group6.1659	-25.021	1,4190412905956e-13	3,0406943590463e-11	0	0	594.531	420.545	0	0	0	0
CL.17021	CL.17021.1	-1.72142	1,47396085577125e-13	3,14157507929541e-11	7180.67	10435	11745.3	7742.18	2214.89	2503.12	2988.48	3546.12
CL.25361	CL.25361.1	-25.0002	1,48636267557768e-13	3,15124615928029e-11	610.228	386.482	0	0	0	0	0	0
CL.28656	evm.model.group7.1771	1.64726	1,55662089912502e-13	3,28283154883891e-11	534.353	380.076	355.636	309.438	1142.77	1097.63	1277.22	1415.69
CL.30440	CL.30440.1	-24.9762	1,56794113608576e-13	3,28939273942181e-11	0	691.824	289.921	0	0	0	0	0
CL.4777	CL.4777.1	-24.9625	1,61618993031976e-13	3,37295471395378e-11	718.39	255.163	0	0	0	0	0	0
CL.30074	CL.30074.1	-24.9578	1,63327760916182e-13	3,39095511912508e-11	844.31	125.98	0	0	0	0	0	0
CL.2489	CL.2489.1	-2.73353	1,67719012916097e-13	3,46417569461237e-11	912.114	1218.16	1208.39	796.439	113.405	94.1997	244.663	172.116
CL.8853	CL.8853.1	-24.9409	1,69586330633518e-13	3,4847816761462e-11	0	779.369	177.045	0	0	0	0	0
CL.34555	CL.34555.1	-24.9345	1,72023904209161e-13	3,51683563350056e-11	0	837.021	0	115.26	0	0	0	0
CL.22866	CL.22866.1	8.4699	1,8212479610232e-13	3,7044368425482e-11	0	21.3526	25.513	0	4834.54	5443.11	5435.11	1131.89
CL.31248	CL.31248.1	-24.8983	1,86404659433506e-13	3,77234075934372e-11	0	199.647	730.601	0	0	0	0	0
CL.31759	CL.31759.1	-24.8743	1,96575715432947e-13	3,95818538562723e-11	768.436	0	141.481	0	0	0	0	0
CL.4372	CL.4372.5	-24.857	2,04271650869423e-13	4,09258252516889e-11	818.481	0	79.6316	0	0	0	0	0
CL.5943	CL.5943.1	-24.8431	2,10668517635373e-13	4,19974502569622e-11	744.22	0	145.347	0	0	0	0	0
CL.21800	CL.21800.1	-24.835	2,14454084738706e-13	4,25404711657424e-11	0	452.675	0	430.928	0	0	0	0
CL.24322	CL.24322.1	-24.8216	2,20932141043294e-13	4,36096103034719e-11	0	514.597	0	360.319	0	0	0	0
CL.11297	CL.11297.1	-24.8052	2,29077345145237e-13	4,48959060031691e-11	0	541.288	323.165	0	0	0	0	0
CL.17420	CL.17420.1	-24.804	2,29689561533558e-13	4,48959060031691e-11	0	0	85.0435	779.825	0	0	0	0
CL.27558	CL.27558.1	-24.7818	2,41181170136239e-13	4,66866158809619e-11	461.707	0	0	401.854	0	0	0	0
CL.27728	CL.27728.1	-24.7829	2,40615010441257e-13	4,66866158809619e-11	682.874	172.956	0	0	0	0	0	0
CL.9620	CL.9620.1	-24.7781	2,43215896722508e-13	4,68541393349563e-11	0	607.481	0	239.866	0	0	0	0
CL.6930	CL.6930.1	-9.09607	2,48711839788091e-13	4,76836527287502e-11	88.7898	119.574	66.4885	70.61	0	0	0	0
CL.22827	CL.22827.1	-24.7619	2,52033156311843e-13	4,80903265400741e-11	661.888	0	175.499	0	0	0	0	0
CL.13481	CL.13481.1	1.86327	2,56041633136337e-13	4,86236409467916e-11	295.428	277.584	213.382	222.214	694.387	761.789	1108.59	1098.39
CL.11932	CL.11932.1	-24.726	2,72809529100351e-13	5,13827697418787e-11	610.228	209.255	0	0	0	0	0	0
CL.4255	CL.4255.1	-9.73762	2,73135262166712e-13	5,13827697418787e-11	85.5611	246.622	128.338	77.8786	0	0	0	0
CL.6717	CL.6717.1	-24.7208	2,75930023046952e-13	5,16659627265953e-11	731.305	0	0	84.1089	0	0	0	0
CL.2083	CL.2083.1	-24.7082	2,83672592606292e-13	5,2868654817368e-11	0	561.573	0	257.519	0	0	0	0
CL.5527	evm.model.group10.719	-24.7046	2,85970245507798e-13	5,30501284143401e-11	0	526.341	282.19	0	0	0	0	0
CL.10952	CL.10952.1	-24.7008	2,8836476127661e-13	5,32081120354897e-11	269.598	542.356	0	0	0	0	0	0
CL.4379	CL.4379.3	-7.58067	2,89959666764835e-13	5,32081120354897e-11	4052.04	7146.71	8357.45	2259.52	0	7.50868	42.8506	63.7224
CL.4375	evm.model.group1.3285	-2.87627	2,90805503762721e-13	5,32081120354897e-11	476.236	571.182	800.955	356.165	46.2343	100.343	87.0834	67.0071
CL.13856	CL.13856.1	-1.58316	2,92375321638144e-13	5,32521779001838e-11	7915.21	6149.54	5433.5	4145.22	2218.38	1801.4	1951.77	1918.24
CL.7199	CL.7199.3	24.6869	2,96024154628397e-13	5,3672795818823e-11	0	0	0	0	0	707.181	0	957.807
CL.31746	CL.31746.1	-24.6698	3,08719811870855e-13	5,57225354129061e-11	0	396.09	390.427	0	0	0	0	0
CL.11951	CL.11951.1	-24.6667	3,1082141169351e-13	5,58502868455559e-11	464.936	0	0	317.745	0	0	0	0
CL.1658	CL.1658.1	-24.6478	3,24037626729075e-13	5,7965123674259e-11	343.859	435.593	0	0	0	0	0	0
CL.34587	CL.34587.1	-24.6432	3,27358306317787e-13	5,82988770406833e-11	0	0	511.034	256.48	0	0	0	0
CL.18541	evm.model.group4.535	-1.17699	3,50194128815604e-13	6,20897289453153e-11	2271.41	1902.52	1892.6	1924.12	956.963	1029.37	710.49	831.019
CL.12668	CL.12668.1	-24.606	3,55169809109862e-13	6,26945121190845e-11	516.595	0	231.937	0	0	0	0	0
CL.11426	CL.11426.1	-1.29839	3,61566966610002e-13	6,35438085616788e-11	552.111	486.839	450.73	434.044	192.788	212.973	160.344	210.875
CL.24949	CL.24949.1	-24.5949	3,6390029506612e-13	6,36367691392243e-11	427.806	316.018	0	0	0	0	0	0
CL.3796	CL.3796.7	-24.593	3,65272196207177e-13	6,36367691392243e-11	452.021	332.033	0	0	0	0	0	0
CL.33474	CL.33474.1	-24.5866	3,70608077690434e-13	6,42868643855224e-11	439.106	0	296.879	0	0	0	0	0
CL.379	CL.379.3	9.14231	3,81177901063698e-13	6,58353383431999e-11	0	0	0	0	101.192	72.3563	176.931	101.168
CL.26071	CL.26071.1	-24.5696	3,84082252965887e-13	6,60522569800133e-11	682.874	0	221.886	0	0	0	0	0
CL.23303	CL.23303.1	-24.5655	3,88140197965432e-13	6,61820329041483e-11	579.555	0	150.759	0	0	0	0	0
CL.25096	CL.25096.1	-24.5674	3,86523629211202e-13	6,61820329041483e-11	0	514.597	211.836	0	0	0	0	0
CL.11153	CL.11153.1	24.5534	3,96695148410429e-13	6,73541296474825e-11	0	0	0	0	703.983	0	810.014	0
CL.21100	CL.21100.1	-24.5482	4,03109051590905e-13	6,80940613534331e-11	0	543.423	174.726	0	0	0	0	0
CL.24853	CL.24853.1	-24.5448	4,06151251895945e-13	6,80940613534331e-11	616.686	0	98.1865	0	0	0	0	0
CL.6460	evm.model.group11.141	0.539303	4,05122322130363e-13	6,80940613534331e-11	925.029	982.219	876.721	939.736	1342.54	1323.57	1368.45	1374.3
CL.7524	CL.7524.1	-24.5385	4,11773331753873e-13	6,85118862115409e-11	610.228	0	0	100.723	0	0	0	0
CL.9658	CL.9658.1	-24.537	4,12063004167241e-13	6,85118862115409e-11	0	452.675	0	635.49	0	0	0	0
CL.19426	CL.19426.1	-24.519	4,29721600934612e-13	7,1152663427479e-11	534.353	0	0	173.41	0	0	0	0
CL.8896	CL.8896.1	-24.506	4,42130131729137e-13	7,29059850962409e-11	372.917	323.492	0	0	0	0	0	0
CL.32477	evm.model.group9.779	-24.5037	4,44312673504111e-13	7,29656099479906e-11	0	88.6132	0	605.377	0	0	0	0
evm.TU.utg2545_783869_1007504__.29	evm.model.utg2545_783869_1007504__.29	24.4867	4,58782704165123e-13	7,50343794118224e-11	0	0	0	0	0	0	913.685	572.845
CL.24289	CL.24289.15	9.8346	4,72510106647995e-13	7,69653657454682e-11	0	0	0	0	230.299	154.269	287.513	57.1531
CL.34565	CL.34565.1	-24.4645	4,84035359516723e-13	7,8523469051964e-11	518.21	0	0	155.757	0	0	0	0
CL.14472	CL.14472.6	-24.4522	4,97199334977325e-13	7,89253324194977e-11	524.667	0	143.028	0	0	0	0	0
CL.2402	CL.2402.1	-24.451	4,98330648917717e-13	7,89253324194977e-11	529.51	176.159	0	0	0	0	0	0
CL.4566	CL.4566.1	-24.4544	4,94817075314795e-13	7,89253324194977e-11	540.811	128.116	0	0	0	0	0	0
CL.8361	CL.8361.3	-9.22708	4,90276873579849e-13	7,89253324194977e-11	71.0319	62.9901	106.691	137.066	0	0	0	0
CL.8578	CL.8578.1	-24.456	4,93079819075938e-13	7,89253324194977e-11	531.125	0	0	140.182	0	0	0	0
CL.18278	evm.model.group4.392	1.40503	4,9237631077236e-13	7,89253324194977e-11	348.702	321.356	248.172	363.434	788.601	979.541	870.834	747.589
CL.14514	CL.14514.1	-24.4301	5,21414282295842e-13	8,16135558265405e-11	553.726	0	0	161.988	0	0	0	0
CL.19474	CL.19474.1	-24.4331	5,18350622064148e-13	8,16135558265405e-11	602.156	0	0	57.111	0	0	0	0
CL.3611	CL.3611.1	-24.4306	5,21161268987611e-13	8,16135558265405e-11	458.478	0	0	198.331	0	0	0	0
CL.32764	CL.32764.1	9.58798	5,37925328545794e-13	8,38703031705446e-11	0	0	0	0	117.767	116.043	295.807	85.4012
CL.15377	CL.15377.1	-24.4085	5,46851172392273e-13	8,49314979758076e-11	0	461.216	0	184.832	0	0	0	0
CL.7072	CL.7072.1	-24.4047	5,5140533815432e-13	8,53081540534502e-11	0	357.656	0	287.632	0	0	0	0
CL.14991	CL.14991.1	-24.3872	5,72369455337477e-13	8,7204730324611e-11	418.119	281.854	0	0	0	0	0	0
CL.20980	CL.20980.1	-24.3894	5,70088793047086e-13	8,7204730324611e-11	590.856	46.9757	0	0	0	0	0	0
CL.5056	evm.model.group10.386	-24.3892	5,70398255008101e-13	8,7204730324611e-11	132.378	0	504.849	0	0	0	0	0
CL.22829	evm.model.group5.1525	-24.3881	5,71659654179007e-13	8,7204730324611e-11	0	515.665	0	123.567	0	0	0	0
CL.10898	CL.10898.1	-24.3851	5,75479722458708e-13	8,73464866625774e-11	460.093	0	179.364	0	0	0	0	0
CL.24026	CL.24026.1	-24.3814	5,8005277407923e-13	8,75347893870268e-11	590.856	0	47.1605	0	0	0	0	0
CL.27366	CL.27366.1	-24.3803	5,81089442898655e-13	8,75347893870268e-11	447.178	250.893	0	0	0	0	0	0
CL.11136	evm.model.group2.289	1.11203	5,83713756229748e-13	8,76007873113333e-11	2147.1	1585.43	1948.27	1545.11	3739.75	3491.53	4268.47	4113.71
CL.19771	CL.19771.1	-24.3723	5,90386223141507e-13	8,8271552094329e-11	653.816	0	195.6	0	0	0	0	0
CL.34710	CL.34710.1	-24.3658	6,00124851028388e-13	8,93940623818123e-11	0	453.742	176.272	0	0	0	0	0
CL.964	CL.964.1	-24.3534	6,165239277922e-13	9,1496717728272e-11	0	350.182	269.82	0	0	0	0	0
CL.14253	CL.14253.1	-1.32534	6,25809944602644e-13	9,25321198532397e-11	3130.24	3317.12	4031.83	3373.7	1539.69	1030.74	1611.73	1351.31
CL.11974	CL.11974.1	-24.3441	6,29000257735673e-13	9,26619129686339e-11	482.694	0	136.843	0	0	0	0	0
CL.11879	CL.11879.1	2.56409	6,583423114285e-13	9,61401136013396e-11	400.361	376.873	368.779	264.787	2527.19	2757.73	2073.41	982.114
CL.26713	CL.26713.8	-24.3228	6,58845560905032e-13	9,61401136013396e-11	0	291.463	318.526	0	0	0	0	0
CL.4905	CL.4905.3	-1.29185	6,5980861593133e-13	9,61401136013396e-11	503.68	388.617	437.587	399.777	166.618	203.417	160.344	172.773
CL.23914	CL.23914.3	8.65515	6,76182968173927e-13	9,81690272997436e-11	0	0	0	0	72.4047	78.4998	100.906	70.2917
CL.17679	CL.17679.1	-24.2907	7,062554356236e-13	1,02164820597248e-10	482.694	0	0	114.222	0	0	0	0
CL.25796	CL.25796.1	24.2788	7,2028691469933e-13	1,03615248758797e-10	0	0	0	0	1243.09	0	0	197.737
CL.3828	evm.model.group1.2994	24.2783	7,21453815914755e-13	1,03615248758797e-10	0	0	0	0	0	0	816.925	433.575
CL.999	CL.999.1	-24.2756	7,29860616407413e-13	1,04448267498018e-10	448.792	137.724	0	0	0	0	0	0
CL.32398	CL.32398.1	-24.2703	7,37933051227023e-13	1,05227677447213e-10	542.425	0	78.8585	0	0	0	0	0
CL.10874	CL.10874.1	9.84426	7,56112400467712e-13	1,07437673357238e-10	0	0	0	0	327.13	81.9128	233.605	91.3136
CL.24831	evm.model.group6.770	-9.40764	7,70864623077048e-13	1,09146803698577e-10	150.136	145.198	73.4466	60.2261	0	0	0	0
CL.12343	CL.12343.1	-24.2369	7,93655400764457e-13	1,11195006673538e-10	448.792	116.372	0	0	0	0	0	0
CL.20209	CL.20209.1	-24.2394	7,89439741306469e-13	1,11195006673538e-10	503.68	0	67.2616	0	0	0	0	0
CL.29175	evm.model.group8.138	0.521028	7,9229616845271e-13	1,11195006673538e-10	805.566	845.562	811.779	879.509	1218.67	1211.63	1174.93	1191.67
CL.30962	CL.30962.1	-24.2293	8,04793175081062e-13	1,12362587196858e-10	616.686	165.483	0	0	0	0	0	0
CL.14165	CL.14165.1	24.1998	8,54709225934904e-13	1,18917356538929e-10	0	0	0	0	0	272.36	901.244	0
CL.8660	CL.8660.3	-24.1994	8,60659796748385e-13	1,19330927528401e-10	0	0	135.296	422.621	0	0	0	0
CL.22691	CL.22691.1	24.1917	8,69871368995555e-13	1,20192226743627e-10	0	0	0	0	689.153	0	481.032	0
CL.27423	CL.27423.1	-24.1905	8,77448548028988e-13	1,20822554362617e-10	485.922	0	0	65.4181	0	0	0	0
evm.TU.group1.1447	evm.model.group1.1447	24.1769	8,98045595432773e-13	1,23235229482847e-10	0	0	0	0	0	596.598	558.44	0
evm.TU.group16.400	evm.model.group16.400	24.1752	9,01362267640793e-13	1,23268211823777e-10	0	0	0	0	800.813	0	0	354.086
CL.2088	CL.2088.1	24.1615	9,28333466371875e-13	1,26524904753473e-10	0	0	0	0	987.495	0	0	157.664
CL.30909	CL.30909.1	-24.1563	9,4450162327934e-13	1,28292135745095e-10	455.25	0	82.7241	0	0	0	0	0
CL.23848	CL.23848.1	-24.1461	9,65525030980196e-13	1,30704689160056e-10	0	402.496	0	127.721	0	0	0	0
CL.9349	CL.9349.1	-2.75099	9,72749893774122e-13	1,31239354355317e-10	351.931	297.869	271.366	255.442	34.0215	29.3521	74.6429	39.4159
CL.19692	evm.model.group4.1327	-2.81727	9,85699623110653e-13	1,32540214422966e-10	30290.2	39411.5	79428.3	33151.4	4308.52	4514.08	7775.3	9264.71
CL.23522	CL.23522.1	1.67184	1,00730392077579e-12	1,34980492645788e-10	90.4042	90.7485	113.649	89.3008	316.662	334.477	341.422	237.809
evm.TU.group16.264	evm.model.group16.264	-24.1243	1,01058517079452e-12	1,34980492645788e-10	0	541.288	0	73.7251	0	0	0	0
CL.20565	CL.20565.1	-0.682892	1,0302673907185e-12	1,37152207129868e-10	6358.97	7584.44	7348.53	6843.97	4480.37	4486.09	4630.63	3938.97
CL.15333	CL.15333.1	-24.1111	1,04041530585725e-12	1,38044507634769e-10	460.093	100.357	0	0	0	0	0	0
CL.18419	CL.18419.1	-24.0838	1,10410804470711e-12	1,46011912050871e-10	455.25	0	54.1186	0	0	0	0	0
CL.25175	CL.25175.1	24.0779	1,11093300430356e-12	1,4643120224488e-10	0	0	0	0	655.132	0	0	419.78
CL.5240	CL.5240.1	24.07	1,13003923326155e-12	1,48461219923902e-10	0	0	0	0	367.258	0	702.196	0
evm.TU.group7.117	evm.model.group7.117	24.063	1,14705605632853e-12	1,50204366591778e-10	0	0	0	0	0	0	675.933	387.59
CL.34064	evm.model.utg548_4040903_4386744__.11	-24.0641	1,15193046205491e-12	1,50351314705343e-10	0	53.3815	448.411	0	0	0	0	0
CL.33951	CL.33951.1	24.0433	1,19648672129182e-12	1,55583330908719e-10	0	0	0	0	666.472	0	0	382.334
CL.7583	evm.model.group11.1002	-24.0442	1,19978161344632e-12	1,55583330908719e-10	0	478.298	0	128.759	0	0	0	0
CL.25706	CL.25706.1	-24.0363	1,22150253010105e-12	1,57783590760027e-10	406.819	0	136.843	0	0	0	0	0
CL.33190	CL.33190.1	-24.0356	1,22462432558943e-12	1,57783590760027e-10	0	393.955	97.4134	0	0	0	0	0
CL.9895	CL.9895.1	-24.0274	1,24629831344816e-12	1,60061453268807e-10	427.806	0	0	63.3413	0	0	0	0
evm.TU.group4.1297	evm.model.group4.1297	24.0157	1,26938672717193e-12	1,62505834369901e-10	0	0	0	0	749.345	0	279.22	0
CL.15354	CL.15354.1	9.20463	1,30038059513387e-12	1,65943472761192e-10	0	0	0	0	153.533	105.804	55.2911	155.693
CL.10022	CL.10022.1	-23.9988	1,3251023127321e-12	1,6856142752754e-10	0	0	442.999	38.4201	0	0	0	0
CL.16234	CL.16234.1	-23.9826	1,3721611505853e-12	1,73995244632763e-10	0	404.631	68.0348	0	0	0	0	0
CL.11015	CL.11015.1	-23.9793	1,38024629350255e-12	1,74468356405827e-10	0	450.54	0	71.6483	0	0	0	0
CL.20884	CL.20884.1	23.9747	1,38588215976781e-12	1,74629868370743e-10	0	0	0	0	0	730.389	0	268.028
CL.30614	CL.30614.1	23.9694	1,40163844351857e-12	1,76061606369244e-10	0	0	0	0	367.258	0	627.553	0
CL.16707	CL.16707.1	-23.9706	1,40786576874921e-12	1,76291191730565e-10	408.433	0	0	60.2261	0	0	0	0
CL.21833	CL.21833.1	-10.7951	1,46854232531032e-12	1,8274686638256e-10	473.008	291.463	327.804	29.0747	0	0	0	0
CL.8366	CL.8366.1	23.9486	1,46529417285506e-12	1,8274686638256e-10	0	0	0	0	0	0	850.1	133.357
CL.33782	evm.model.utg415_5514107_5609984__.7	23.9276	1,52914518335686e-12	1,89699218257304e-10	0	0	0	0	0	1260.09	0	674.669
CL.33688	CL.33688.1	23.9232	1,54673311170581e-12	1,91288875882876e-10	0	0	0	0	772.898	0	189.372	0
CL.34920	CL.34920.1	-23.9025	1,6284356336671e-12	2,00773587203202e-10	0	54.4491	0	391.47	0	0	0	0
CL.21434	CL.21434.1	23.8897	1,66129196241517e-12	2,04196223723852e-10	0	0	0	0	674.323	0	266.779	0
CL.10968	CL.10968.4	-23.8881	1,6786002988481e-12	2,05692703286982e-10	392.29	0	0	64.3797	0	0	0	0
CL.26027	CL.26027.1	23.8732	1,72078483973993e-12	2,102190503914e-10	0	0	0	0	272.172	0	0	656.932
CL.3481	CL.3481.1	-23.8746	1,72622326158525e-12	2,10242450126811e-10	432.649	56.5843	0	0	0	0	0	0
CL.30912	CL.30912.1	0.986318	1,75373564030587e-12	2,12946021536534e-10	308.343	296.801	301.518	354.088	596.685	600.694	594.379	703.574
evm.TU.group4.1105	evm.model.group4.1105	23.8488	1,8125751948203e-12	2,19425643675074e-10	0	0	0	0	820.005	0	0	95.2552
CL.4969	evm.model.group10.354	-2.80377	1,8620692607901e-12	2,2473829903572e-10	7319.51	19458.6	21144.9	14517.6	2211.4	1507.2	1704.35	3518.53
CL.16	CL.16.1	-23.831	1,89426212798917e-12	2,25526783003705e-10	43.5877	437.728	0	0	0	0	0	0
CL.32600	CL.32600.1	23.8299	1,88680533470018e-12	2,25526783003705e-10	0	0	0	0	587.961	0	313.777	0
CL.34819	CL.34819.1	9.92975	1,88609288717872e-12	2,25526783003705e-10	0	0	0	0	141.32	374.751	56.6733	204.963
CL.6556	CL.6556.1	23.8274	1,89674384507733e-12	2,25526783003705e-10	0	0	0	0	456.237	0	447.858	0
evm.TU.group8.266	evm.model.group8.266	23.8284	1,88850529835715e-12	2,25526783003705e-10	0	0	0	0	1572.84	0	0	262.773
CL.4508	CL.4508.1	-23.8247	1,92247289938623e-12	2,27909731001202e-10	380.989	0	0	43.612	0	0	0	0
CL.11446	CL.11446.1	-23.8211	1,93721722035094e-12	2,28980218346496e-10	377.76	0	44.8411	0	0	0	0	0
CL.6968	evm.model.group11.468	23.8145	1,94930040119736e-12	2,29730785517583e-10	0	0	0	0	433.556	0	0	466.422
CL.33550	CL.33550.1	23.8062	1,9840818477879e-12	2,3314416316968e-10	0	0	0	0	674.323	0	0	210.218
CL.24922	evm.model.group6.814	-23.8051	2,00438575110118e-12	2,34841336393638e-10	384.218	30.9612	0	0	0	0	0	0
CL.34806	evm.model.utg87_2701784_3545125__.3	-0.537799	2,04747879034983e-12	2,39190889589847e-10	7887.76	7846.01	6989.8	7332.01	5237.56	4812.38	5164.18	5482.76
CL.8143	CL.8143.1	-23.7902	2,06057521495831e-12	2,40021072277266e-10	403.59	197.511	0	0	0	0	0	0
CL.27157	CL.27157.1	23.7837	2,08134503769917e-12	2,41737668581466e-10	0	0	0	0	498.109	0	374.597	0
CL.24210	CL.24210.1	23.7815	2,09077614870478e-12	2,42131214678037e-10	0	0	0	0	635.94	0	0	233.868
CL.18105	CL.18105.1	23.7707	2,13937427344433e-12	2,47045323161136e-10	0	0	0	0	580.11	0	0	279.853
CL.24498	CL.24498.1	23.7563	2,20560928561324e-12	2,53961965731387e-10	0	0	0	0	0	262.804	591.614	0
CL.16080	CL.16080.5	-2.55582	2,21245656032262e-12	2,54020442327013e-10	350.316	329.897	156.171	251.288	46.2343	39.5912	48.3797	50.5838
CL.30802	CL.30802.1	-23.7461	2,26430034946149e-12	2,59230042865491e-10	443.949	0	107.464	0	0	0	0	0
CL.14624	CL.14624.1	23.7419	2,27396790392137e-12	2,59595139345098e-10	0	0	0	0	0	0	717.401	129.416
CL.23511	CL.23511.1	23.7299	2,33246486954315e-12	2,65516668530097e-10	0	0	0	0	411.747	0	0	425.692
CL.7067	CL.7067.1	23.7122	2,42162299062696e-12	2,74885079984199e-10	0	0	0	0	313.172	0	514.207	0
CL.5863	CL.5863.1	23.6955	2,50792714854932e-12	2,83877516503873e-10	0	0	0	0	635.94	227.991	0	0
CL.17437	CL.17437.1	23.6884	2,54629700285619e-12	2,87408791280133e-10	0	0	0	0	288.746	0	525.265	0
CL.10986	CL.10986.1	-23.6896	2,56136307004679e-12	2,88297242181952e-10	29.0585	355.521	0	0	0	0	0	0
CL.24369	CL.24369.1	23.6787	2,59916821864513e-12	2,91732970647368e-10	0	0	0	0	367.258	440.281	0	0
CL.2975	CL.2975.1	-23.6728	2,63697261733847e-12	2,95149421164114e-10	0	569.046	163.129	0	0	0	0	0
CL.18297	CL.18297.1	23.6618	2,69379311016514e-12	3,00669331265508e-10	0	0	0	0	0	0	537.706	260.145
CL.25673	evm.model.group6.1373	-9.61329	2,72835209099523e-12	3,03680745239386e-10	203.409	140.927	45.6142	104.877	0	0	0	0
CL.5002	CL.5002.1	23.6419	2,80804004452249e-12	3,11684666437718e-10	0	0	0	0	257.342	596.598	0	0
CL.151	CL.151.1	23.6359	2,84483385024685e-12	3,14896387788373e-10	0	0	0	0	0	0	536.323	246.35
CL.11824	CL.11824.2	1.57346	2,87499041308267e-12	3,17357757168657e-10	192.109	200.714	241.987	230.521	855.771	578.168	588.85	558.392
CL.1226	CL.1226.1	23.618	2,95457663241438e-12	3,25246938628693e-10	0	0	0	0	0	139.934	635.847	0
CL.17648	CL.17648.1	23.6104	3,00214864200178e-12	3,29578345438387e-10	0	0	0	0	713.579	64.165	0	0
CL.27259	CL.27259.1	23.6088	3,01214405443417e-12	3,29772164648026e-10	0	0	0	0	526.024	0	241.898	0
CL.16379	CL.16379.1	23.5956	3,09681442498889e-12	3,38118130815544e-10	0	0	0	0	355.917	0	407.772	0
CL.13190	CL.13190.1	23.5851	3,16630564832413e-12	3,44765943827032e-10	0	0	0	0	150.043	0	608.202	0
CL.11943	CL.11943.1	23.5768	3,22225536501032e-12	3,48164001591264e-10	0	0	0	0	546.961	0	0	204.306
CL.12046	CL.12046.1	23.5753	3,23226874449589e-12	3,48164001591264e-10	0	0	0	0	451.003	0	298.572	0
CL.23870	CL.23870.2	23.5754	3,23165073424181e-12	3,48164001591264e-10	0	0	0	0	0	322.19	0	427.663
CL.3111	CL.3111.1	-23.5785	3,22472890795116e-12	3,48164001591264e-10	0	417.443	0	100.723	0	0	0	0
CL.6689	CL.6689.1	23.5721	3,25433137887646e-12	3,49600692631581e-10	0	0	0	0	357.662	390.451	0	0
CL.6159	CL.6159.5	9.17693	3,29520709928852e-12	3,53045316760671e-10	0	0	0	0	191.916	82.5954	63.5847	123.503
CL.27618	CL.27618.1	23.5647	3,3053125306053e-12	3,53183661603611e-10	0	0	0	0	539.11	207.512	0	0
CL.1252	CL.1252.1	23.5586	3,34807269127116e-12	3,56556706820188e-10	0	0	0	0	288.746	0	452.004	0
CL.3770	CL.3770.3	9.44963	3,35467627829326e-12	3,56556706820188e-10	0	0	0	0	150.916	127.647	229.458	50.5838
CL.13550	CL.13550.1	23.5557	3,36825597531309e-12	3,57052954843374e-10	0	0	0	0	0	0	478.268	272.627
CL.29146	CL.29146.1	23.5506	3,40474209708946e-12	3,59968379499669e-10	0	0	0	0	498.109	0	239.134	0
CL.34084	CL.34084.1	23.5457	3,43963951083323e-12	3,62360030234088e-10	0	0	0	0	651.642	0	0	82.7734
CL.14218	evm.model.group2.2468	-1.74039	3,44544975091558e-12	3,62360030234088e-10	1417.41	1107.13	1780.5	2096.49	462.343	547.451	503.149	404.013
CL.26819	CL.26819.1	10.3401	3,51794408991682e-12	3,69015758332374e-10	0	0	0	0	549.578	228.673	45.6151	210.218
CL.28359	CL.28359.1	23.5309	3,54848202003144e-12	3,71247192017388e-10	0	0	0	0	507.705	0	218.4	0
CL.34647	evm.model.utg7713_1788465_2127490__.10	23.529	3,56249310581658e-12	3,71742444661642e-10	0	0	0	0	0	225.943	501.766	0
CL.10925	CL.10925.1	23.5252	3,59138482407083e-12	3,73783869871476e-10	0	0	0	0	591.45	131.743	0	0
CL.34757	CL.34757.1	23.5227	3,61028977970982e-12	3,74778008997338e-10	0	0	0	0	0	240.96	482.414	0
CL.8709	CL.8709.1	23.5184	3,64256347925636e-12	3,77151210888378e-10	0	0	0	0	437.918	0	0	283.138
CL.30322	CL.30322.1	23.5104	3,70469426728911e-12	3,82595616727512e-10	0	0	0	0	519.918	0	0	197.737
CL.16983	evm.model.group3.2271	-2.31235	3,71797197486099e-12	3,82979786716401e-10	211.481	185.767	183.23	316.706	39.2556	45.7347	38.7037	55.8392
CL.17140	CL.17140.1	23.5039	3,7515094370002e-12	3,85443546514354e-10	0	0	0	0	793.835	0	81.5543	0
CL.12422	CL.12422.1	9.14112	3,81831976743355e-12	3,90181892374669e-10	0	0	0	0	176.214	68.2607	136.845	69.6348
CL.2489	evm.model.group1.2089	-2.384	3,80832609570562e-12	3,90181892374669e-10	3257.78	2092.55	3323.65	2454.73	553.94	289.425	800.338	491.385
CL.28004	evm.model.group7.1318	23.4949	3,82684012236698e-12	3,90181892374669e-10	0	0	0	0	644.664	62.7998	0	0
CL.33898	CL.33898.1	23.4926	3,84580012870226e-12	3,91119825271826e-10	0	0	0	0	460.599	0	0	245.693
CL.3642	CL.3642.1	23.4899	3,86744312651005e-12	3,92325179947488e-10	0	0	0	0	170.107	0	534.941	0
CL.4786	CL.4786.8	-7.33301	3,89994739489258e-12	3,94623464932692e-10	129.149	134.521	96.6403	138.105	0	0	0	2.62773
CL.28212	CL.28212.1	23.4837	3,91811404812212e-12	3,94649840681212e-10	0	0	0	0	342.832	0	0	361.313
CL.818	CL.818.1	23.4834	3,91990607913957e-12	3,94649840681212e-10	0	0	0	0	497.237	204.782	0	0
CL.30227	CL.30227.1	23.477	3,97356914144771e-12	3,99049913528345e-10	0	0	0	0	372.492	0	327.6	0
CL.12598	CL.12598.1	23.473	4,00676375875587e-12	4,01377559533369e-10	0	0	0	0	429.194	0	0	267.371
CL.2295	CL.2295.1	23.4546	4,16418393467087e-12	4,16106858509381e-10	0	0	0	0	507.705	0	179.696	0
CL.29579	CL.29579.1	23.4525	4,18229395813997e-12	4,16876912693206e-10	0	0	0	0	526.024	160.413	0	0
CL.31275	CL.31275.1	23.4492	4,21180322351653e-12	4,18776563688108e-10	0	0	0	0	322.768	0	362.156	0
CL.3573	CL.3573.1	23.4379	4,31228000161074e-12	4,27705593229065e-10	0	0	0	0	531.259	0	147.904	0
CL.15269	CL.15269.1	23.4338	4,34951879778093e-12	4,30061717488156e-10	0	0	0	0	0	260.073	418.83	0
CL.29809	CL.29809.1	23.4327	4,35750080609412e-12	4,30061717488156e-10	0	0	0	0	498.109	0	240.516	0
CL.27180	CL.27180.1	23.4246	4,43374549858936e-12	4,35151013808119e-10	0	0	0	0	416.109	0	0	259.488
CL.3281	CL.3281.1	23.4238	4,44119652252042e-12	4,35151013808119e-10	0	0	0	0	477.173	0	0	195.109
CL.6470	CL.6470.1	-1.7542	4,44164623527628e-12	4,35151013808119e-10	1181.71	1337.74	1020.52	1380.01	368.13	468.951	237.752	379.707
CL.27879	CL.27879.1	23.4214	4,46389835586398e-12	4,36264407608462e-10	0	0	0	0	0	0	221.164	451.969
CL.23041	CL.23041.1	23.4188	4,48760506889729e-12	4,3751419734967e-10	0	0	0	0	0	191.813	478.268	0
CL.4456	CL.4456.1	23.4093	4,57791598176474e-12	4,45235663566294e-10	0	0	0	0	0	157	508.678	0
CL.1917	CL.1917.1	23.4044	4,62483141118958e-12	4,4870943013648e-10	0	0	0	0	0	0	501.766	161.605
CL.8573	CL.8573.1	23.4008	4,65977445102832e-12	4,51007638291558e-10	0	0	0	0	243.384	0	0	419.78
CL.17987	CL.17987.1	23.3984	4,68322356756819e-12	4,52184983981825e-10	0	0	0	0	0	345.399	0	314.67
CL.15801	CL.15801.1	23.3909	4,75773663846147e-12	4,55630822806937e-10	0	0	0	0	561.791	0	96.7593	0
CL.18369	CL.18369.1	23.3933	4,73394403646701e-12	4,55630822806937e-10	0	0	0	0	429.194	228.673	0	0
CL.31452	CL.31452.1	23.3914	4,75206243253014e-12	4,55630822806937e-10	0	0	0	0	0	163.143	494.855	0
CL.6540	CL.6540.1	23.3902	4,76439517734231e-12	4,55630822806937e-10	0	0	0	0	431.811	224.578	0	0
CL.12086	CL.12086.1	23.3877	4,78970644390285e-12	4,56960802874255e-10	0	0	0	0	0	0	369.068	286.422
CL.26583	CL.26583.1	23.3864	4,80186780800659e-12	4,57032881393881e-10	0	0	0	0	0	306.49	0	348.174
CL.9240	CL.9240.1	23.382	4,84126305797082e-12	4,58881415786047e-10	0	0	0	0	596.685	0	0	197.737
CL.27722	evm.model.group7.1033	1.88511	4,84419363307956e-12	4,58881415786047e-10	414.891	281.854	461.554	412.238	2011.63	1314.7	1383.66	1093.14
CL.20420	CL.20420.1	23.3782	4,87914190513111e-12	4,59455661748693e-10	0	0	0	0	572.259	240.96	0	0
CL.5363	CL.5363.1	-10.6206	4,86313104124391e-12	4,59455661748693e-10	95.2473	59.7872	241.987	596.031	0	0	0	0
CL.9968	CL.9968.1	23.3782	4,88465465198261e-12	4,59455661748693e-10	0	0	0	0	0	0	570.88	82.1165
CL.17141	CL.17141.1	23.3767	4,90068455919841e-12	4,59883911679345e-10	0	0	0	0	588.833	0	0	61.0947
CL.16247	CL.16247.1	23.3739	4,92946171557680e-12	4,61503576970006e-10	0	0	0	0	560.918	88.0563	0	0
CL.5453	CL.5453.1	23.3718	4,95092641590306e-12	4,61682981168459e-10	0	0	0	0	511.195	136.521	0	0
CL.9327	CL.9327.2	2.25296	4,9544218093945e-12	4,61682981168459e-10	142.064	136.657	175.499	119.414	613.259	615.029	1042.24	470.363
CL.6927	CL.6927.1	23.3694	4,97544137507532e-12	4,62565976564427e-10	0	0	0	0	549.578	0	0	99.1968
CL.17797	CL.17797.1	23.3658	5,01291564281969e-12	4,63897297477564e-10	0	0	0	0	336.725	0	308.248	0
CL.18648	CL.18648.1	23.3658	5,01291564281969e-12	4,63897297477564e-10	0	0	0	0	336.725	0	308.248	0
CL.28516	CL.28516.1	23.3626	5,04009215380746e-12	4,65132331707747e-10	0	0	0	0	580.11	0	0	227.299
CL.7750	CL.7750.1	23.3623	5,04947752165884e-12	4,65132331707747e-10	0	0	0	0	334.108	0	0	312.043
CL.5689	CL.5689.1	23.3594	5,08088054604003e-12	4,66951567614275e-10	0	0	0	0	515.556	127.647	0	0
CL.16637	CL.16637.1	23.3549	5,12730306483996e-12	4,70139665464845e-10	0	0	0	0	336.725	0	340.04	0
CL.25303	CL.25303.1	23.3505	5,17615510134742e-12	4,73318494033276e-10	0	0	0	0	427.449	0	212.871	0
CL.5959	CL.5959.1	23.3496	5,18559567957595e-12	4,73318494033276e-10	0	0	0	0	370.747	0	266.779	0
CL.9327	CL.9327.1	2.83517	5,20139604642718e-12	4,73681680864403e-10	71.0319	143.062	107.464	45.6888	639.429	769.981	728.46	490.071
CL.27697	CL.27697.1	23.3441	5,2456318046024e-12	4,76626907960132e-10	0	0	0	0	533.003	102.391	0	0
CL.26918	CL.26918.1	23.3384	5,30809999070893e-12	4,81211689202956e-10	0	0	0	0	0	264.851	367.686	0
CL.15908	CL.15908.1	23.3367	5,32666474508368e-12	4,81366777532388e-10	0	0	0	0	557.429	74.4041	0	0
CL.25682	CL.25682.1	23.3361	5,3338370158318e-12	4,81366777532388e-10	0	0	0	0	0	0	218.4	413.21
CL.31778	CL.31778.1	23.3349	5,347117478484e-12	4,81480892950234e-10	0	0	0	0	477.173	0	0	153.722
CL.12338	CL.12338.1	23.3325	5,37327565475609e-12	4,82751469699723e-10	0	0	0	0	490.258	0	139.61	0
CL.18423	CL.18423.1	23.3313	5,38755568627201e-12	4,82951580198925e-10	0	0	0	0	0	0	384.273	245.036
CL.26244	CL.26244.1	23.326	5,44744785319472e-12	4,87230436333733e-10	0	0	0	0	554.812	0	71.8784	0
CL.11692	CL.11692.1	23.323	5,48065630636797e-12	4,88021995991477e-10	0	0	0	0	546.961	78.4998	0	0
CL.676	CL.676.1	23.3233	5,47360069137202e-12	4,88021995991477e-10	0	0	0	0	540.854	0	165.873	0
CL.33417	CL.33417.1	23.3192	5,52459689613362e-12	4,89757959354147e-10	0	0	0	0	483.28	140.617	0	0
CL.8289	CL.8289.1	23.3198	5,51708997429356e-12	4,89757959354147e-10	0	0	0	0	329.747	0	297.189	0
CL.23834	CL.23834.1	23.3178	5,54126419960618e-12	4,90151118053465e-10	0	0	0	0	0	245.738	377.361	0
CL.20556	CL.20556.1	23.3132	5,59387734364351e-12	4,92630033318232e-10	0	0	0	0	517.301	110.582	0	0
CL.7764	CL.7764.1	2.09399	5,58520834991326e-12	4,92630033318232e-10	201.795	127.048	197.919	105.915	755.451	745.407	674.551	522.261
CL.8985	CL.8985.1	23.312	5,60771090495002e-12	4,92765298160849e-10	0	0	0	0	452.747	0	168.638	0
CL.12592	CL.12592.1	23.3093	5,64002854613272e-12	4,9452066486551e-10	0	0	0	0	278.278	0	341.422	0
CL.2082	CL.2082.1	23.3059	5,68012793984063e-12	4,96949184605708e-10	0	0	0	0	0	0	384.273	233.868
CL.16756	CL.16756.1	23.2958	5,80003394985601e-12	5,05629294513973e-10	0	0	0	0	351.555	0	264.015	0
CL.26629	CL.26629.1	23.2955	5,80457887388139e-12	5,05629294513973e-10	0	0	0	0	241.64	0	371.832	0
CL.17703	CL.17703.1	23.2926	5,83898590521308e-12	5,07523134971557e-10	0	0	0	0	558.301	0	0	53.8684
CL.2289	CL.2289.1	1.53839	5,89131830985102e-12	5,10963473324092e-10	989.603	1009.98	1265.6	1344.7	2544.63	2843.06	3830.29	4180.06
CL.29986	CL.29986.1	9.97026	5,94759806130149e-12	5,14730570877648e-10	0	0	0	0	41.8726	183.621	370.45	204.963
CL.18299	CL.18299.1	23.2784	6,01397721404999e-12	5,19353592601257e-10	0	0	0	0	354.172	0	0	252.262
CL.19820	CL.19820.1	23.2732	6,0793806716017e-12	5,23872652712001e-10	0	0	0	0	496.365	0	0	107.08
CL.29386	CL.29386.1	23.2694	6,12749870851165e-12	5,26885994098845e-10	0	0	0	0	0	55.9738	547.381	0
CL.28867	CL.28867.1	23.2648	6,18714119129556e-12	5,30875262388037e-10	0	0	0	0	0	0	418.83	181.313
CL.16264	CL.16264.1	23.2636	6,2019397331893e-12	5,31007959634392e-10	0	0	0	0	492.875	107.169	0	0
CL.16241	CL.16241.1	23.253	6,33976951523147e-12	5,41651523401546e-10	0	0	0	0	442.279	0	0	152.408
CL.29959	CL.29959.1	23.2501	6,37857397037288e-12	5,43807359559237e-10	0	0	0	0	382.96	212.291	0	0
CL.29740	CL.29740.1	23.2393	6,5231132382921e-12	5,53946725109097e-10	0	0	0	0	389.939	0	0	199.05
evm.TU.group3.1585	evm.model.group3.1585	23.2391	6,52515233969288e-12	5,53946725109097e-10	0	0	0	0	464.088	0	0	126.131
CL.14461	CL.14461.1	23.2372	6,55103717454291e-12	5,5496841349669e-10	0	0	0	0	0	0	456.151	132.043
CL.23298	CL.23298.1	23.234	6,59477188574425e-12	5,57494745699941e-10	0	0	0	0	444.024	142.665	0	0
CL.12459	CL.12459.1	23.2312	6,63385827051186e-12	5,59618317682969e-10	0	0	0	0	425.705	0	160.344	0
CL.1732	CL.1732.1	23.2248	6,72115373482968e-12	5,65791239820642e-10	0	0	0	0	475.428	0	120.258	0
CL.7109	CL.7109.1	23.2235	6,74031121296679e-12	5,66214403152158e-10	0	0	0	0	383.832	0	0	198.394
CL.23618	CL.23618.1	-1.71263	6,83604941607673e-12	5,7305543954434e-10	7179.06	10120.1	11756.9	8529.27	2657.17	2178.88	2612.5	4018.45
CL.29984	CL.29984.1	23.2148	6,86303421122661e-12	5,74116452701149e-10	0	0	0	0	0	160.413	420.212	0
CL.20874	CL.20874.1	23.2115	6,91059457568112e-12	5,76517278759984e-10	0	0	0	0	461.471	0	0	116.277
CL.9412	CL.9412.1	23.2108	6,9205093856639e-12	5,76517278759984e-10	0	0	0	0	0	149.491	428.506	0
CL.20308	CL.20308.1	23.2096	6,93528822650094e-12	5,76549790945835e-10	0	0	0	0	457.982	0	157.58	0
CL.23218	CL.23218.1	0.873095	6,9998046936159e-12	5,80708434934139e-10	1853.29	2252.7	2080.47	2127.64	3240.76	4017.14	3700.35	4273.34
CL.13123	CL.13123.1	23.2017	7,05267841399197e-12	5,83886000100533e-10	0	0	0	0	408.258	0	165.873	0
CL.17241	CL.17241.5	-9.12837	7,11803669636264e-12	5,88081918398455e-10	150.136	67.2606	56.4379	79.9554	0	0	0	0
CL.13255	CL.13255.1	23.1943	7,16178385416813e-12	5,90478763449623e-10	0	0	0	0	493.748	76.452	0	0
CL.31423	CL.31423.1	23.1838	7,31881041043956e-12	6,02186310362039e-10	0	0	0	0	0	143.347	422.977	0
CL.20407	CL.20407.1	23.1771	7,414554913463e-12	6,08813965947669e-10	0	0	0	0	540.854	97.6128	0	0
CL.19031	CL.19031.1	23.1731	7,48214682872532e-12	6,11856374340864e-10	0	0	0	0	403.024	0	158.962	0
CL.25702	CL.25702.1	23.1736	7,47471029592969e-12	6,11856374340864e-10	0	0	0	0	500.726	62.1172	0	0
CL.15224	CL.15224.1	23.1693	7,5368833582189e-12	6,12581980048339e-10	0	0	0	0	555.684	59.3868	0	0
CL.15460	CL.15460.1	23.1705	7,52219749505814e-12	6,12581980048339e-10	0	0	0	0	410.003	0	150.668	0
CL.22368	evm.model.group5.1041	-1.05864	7,52042250741367e-12	6,12581980048339e-10	22326.6	29355.5	27572.6	28268.9	13604.2	10737.4	11875.1	15403.7
CL.996	CL.996.1	23.1604	7,68186556407576e-12	6,23101929458534e-10	0	0	0	0	497.237	59.3868	0	0
CL.17453	CL.17453.1	23.1485	7,87323013733295e-12	6,34769278879137e-10	0	0	0	0	407.385	0	0	144.525
CL.27528	CL.27528.1	23.1491	7,86415810195103e-12	6,34769278879137e-10	0	0	0	0	75.0217	0	0	476.933
CL.3053	CL.3053.1	23.1502	7,84494546861716e-12	6,34769278879137e-10	0	0	0	0	505.088	0	51.1442	0
CL.15812	CL.15812.1	23.1459	7,91516218138062e-12	6,3686857150185e-10	0	0	0	0	471.067	79.865	0	0
CL.13106	CL.13106.1	23.1425	7,97215816508886e-12	6,40169093537296e-10	0	0	0	0	494.62	0	55.2911	0
CL.15074	CL.15074.1	9.65385	8,04123996938235e-12	6,44424971146301e-10	0	0	0	0	288.746	64.8477	78.7898	210.218
CL.14362	CL.14362.2	4.45898	8,13404672313682e-12	6,50561381628927e-10	29.0585	37.367	57.2111	11.4222	668.217	916.741	1170.79	229.269
CL.24410	evm.model.group6.489	-1.07369	8,28439437186909e-12	6,61266299762539e-10	1459.38	1723.15	1591.86	1750.71	656.876	889.437	691.138	859.267
CL.17841	CL.17841.1	23.1215	8,32585751568669e-12	6,63254693148242e-10	0	0	0	0	440.535	0	0	101.168
CL.4385	CL.4385.1	-6.96278	8,54733922751118e-12	6,79547386599946e-10	4754.29	5915.73	8923.38	2248.1	32.2768	0	82.9366	60.4378
CL.929	CL.929.1	23.1068	8,5825753024353e-12	6,80997608650658e-10	0	0	0	0	455.364	0	80.172	0
CL.31923	CL.31923.1	23.0978	8,74279965528753e-12	6,92339885745793e-10	0	0	0	0	0	0	418.83	114.306
CL.1180	CL.1180.1	23.0915	8,85761434847469e-12	7,0004853440509e-10	0	0	0	0	448.386	81.2302	0	0
CL.33774	CL.33774.1	10.4058	8,92709214212484e-12	7,04150752234138e-10	0	0	0	0	592.323	296.251	149.286	44.6714
CL.33266	CL.33266.1	23.086	8,95790973784383e-12	7,05193405099022e-10	0	0	0	0	441.407	86.6911	0	0
CL.24978	CL.24978.1	23.0838	8,99922963453704e-12	7,07057120501763e-10	0	0	0	0	406.513	0	120.258	0
CL.25623	CL.25623.1	23.0814	9,04378988836626e-12	7,09167633712008e-10	0	0	0	0	0	0	460.298	65.6932
CL.6115	CL.6115.1	23.072	9,22054133840101e-12	7,21615412948688e-10	0	0	0	0	483.28	0	0	41.3867
CL.31309	CL.31309.1	23.069	9,27866413659838e-12	7,24748678271924e-10	0	0	0	0	101.192	0	420.212	0
evm.TU.group12.965	evm.model.group12.965	23.0669	9,31767049000139e-12	7,26379487420925e-10	0	0	0	0	464.088	0	59.4379	0
CL.26385	CL.26385.1	23.0607	9,43491701238835e-12	7,3409150424544e-10	0	0	0	0	0	0	445.093	97.8829
CL.18210	CL.18210.1	23.0553	9,54319241318945e-12	7,41076976737405e-10	0	0	0	0	478.918	38.226	0	0
CL.23928	CL.23928.1	23.0535	9,57894769159578e-12	7,42414765961785e-10	0	0	0	0	410.003	105.804	0	0
CL.24521	CL.24521.1	23.0393	9,86432059231192e-12	7,63056614158183e-10	0	0	0	0	430.066	0	0	80.1457
CL.30423	CL.30423.1	1.82267	9,95129487417223e-12	7,68301321017498e-10	67.8031	73.6664	110.557	98.6463	294.853	337.208	261.25	354.743
CL.31019	CL.31019.1	23.0335	9,98261697516393e-12	7,69237427297728e-10	0	0	0	0	415.237	93.5171	0	0
CL.3455	CL.3455.1	23.0297	1,0050982133625e-11	7,73018913808739e-10	0	0	0	0	412.62	0	0	160.291
CL.17776	CL.17776.1	23.0261	1,01343717170747e-11	7,76451768074923e-10	0	0	0	0	38.3832	0	467.209	0
CL.27314	evm.model.group7.853	8.86775	1,01193500538567e-11	7,76451768074923e-10	0	0	0	0	133.469	79.865	109.2	50.5838
CL.22147	CL.22147.1	23.0218	1,02256356800762e-11	7,81948896375295e-10	0	0	0	0	439.662	0	0	65.6932
CL.26815	CL.26815.1	23.0155	1,03591832820102e-11	7,90652331638381e-10	0	0	0	0	0	410.247	0	91.9705
CL.21802	CL.21802.1	23.0011	1,06551452473456e-11	8,08985960953745e-10	0	0	0	0	401.279	0	197.666	0
CL.32073	CL.32073.1	23.0015	1,06599597550182e-11	8,08985960953745e-10	0	0	0	0	436.173	0	62.2024	0
CL.8122	CL.8122.1	23.0019	1,06511786300516e-11	8,08985960953745e-10	0	0	0	0	402.151	95.565	0	0
CL.24935	CL.24935.1	22.994	1,08262516422084e-11	8,20052747265203e-10	0	0	0	0	0	76.452	418.83	0
CL.13542	CL.13542.1	1.23341	1,09035579242924e-11	8,23347946197278e-10	807.18	751.611	739.105	500.5	1600.75	1720.85	1629.7	1622.62
evm.TU.group7.1214	evm.model.group7.1214	22.9902	1,09108499982719e-11	8,23347946197278e-10	0	0	0	0	0	75.0868	418.83	0
CL.9276	CL.9276.1	22.983	1,10728040427921e-11	8,33998605253154e-10	0	0	0	0	449.258	43.6868	0	0
CL.3045	CL.3045.1	22.9807	1,1125888670986e-11	8,34858350274175e-10	0	0	0	0	425.705	64.8477	0	0
CL.7137	CL.7137.1	22.981	1,11185550445966e-11	8,34858350274175e-10	0	0	0	0	0	0	409.154	81.4596
CL.32456	CL.32456.1	22.9696	1,13835221948331e-11	8,52593895975631e-10	0	0	0	0	58.4472	0	427.123	0
CL.15725	CL.15725.1	22.9583	1,16508419917794e-11	8,70490495545147e-10	0	0	0	0	442.279	0	0	39.4159
CL.29204	CL.29204.1	22.9577	1,16659195434925e-11	8,70490495545147e-10	0	0	0	0	413.492	0	0	67.664
CL.32107	CL.32107.1	22.9489	1,18780494385856e-11	8,84671823427739e-10	0	0	0	0	440.535	0	0	38.759
CL.12127	CL.12127.1	22.9442	1,1992155411389e-11	8,91513297466338e-10	0	0	0	0	416.981	0	0	59.7808
CL.13542	evm.model.group2.1907	1.57785	1,21188164102407e-11	8,99261062145081e-10	899.199	769.761	638.599	916.891	2087.52	3203.47	2454.92	1872.91
CL.12298	CL.12298.1	9.75892	1,2407001070822e-11	9,1894368374831e-10	0	0	0	0	79.3835	212.973	335.893	63.7224
CL.8354	CL.8354.1	22.9207	1,25854919586104e-11	9,30444027272176e-10	0	0	0	0	0	0	409.154	59.7808
CL.27917	evm.model.group7.1183	22.9161	1,26319946700719e-11	9,32162111288732e-10	0	0	0	0	525.152	0	1043.62	0
CL.8293	CL.8293.1	22.8919	1,33418864344366e-11	9,82737848213008e-10	0	0	0	0	449.258	37.5434	0	0
CL.14375	CL.14375.1	22.8799	1,36291411074386e-11	1,00205446637626e-09	0	0	0	0	732.77	82.5954	0	0
CL.10609	CL.10609.1	22.8724	1,38923478065602e-11	1,01853601006388e-09	0	0	0	0	0	42.3216	410.536	0
CL.33594	CL.33594.1	22.8714	1,3904147679185e-11	1,01853601006388e-09	0	0	0	0	436.173	98.978	0	0
CL.32402	CL.32402.1	22.8572	1,4330123872777e-11	1,04782493354412e-09	0	0	0	0	397.79	0	0	49.9268
CL.10229	CL.10229.1	22.8536	1,44353301157149e-11	1,05167941406672e-09	0	0	0	0	407.385	0	0	40.0729
CL.6532	CL.6532.1	22.8539	1,44287538825903e-11	1,05167941406672e-09	0	0	0	0	39.2556	0	0	407.298
CL.1637	CL.1637.1	22.8524	1,44708390348814e-11	1,0517339030891e-09	0	0	0	0	401.279	45.7347	0	0
CL.5237	CL.5237.1	22.8519	1,44885728601243e-11	1,0517339030891e-09	0	0	0	0	404.768	0	0	41.3867
CL.32937	CL.32937.1	22.8361	1,49613190097171e-11	1,08408689461006e-09	0	0	0	0	404.768	0	0	36.1313
CL.7648	CL.7648.1	22.8316	1,51006895235267e-11	1,09221052203559e-09	0	0	0	0	404.768	0	0	34.8174
CL.12915	CL.12915.1	22.8276	1,52242122704412e-11	1,09916069491275e-09	0	0	0	0	377.726	62.1172	0	0
CL.104	CL.104.1	22.8055	1,59277619258149e-11	1,14172704895779e-09	0	0	0	0	390.811	0	41.4683	0
CL.18900	CL.18900.1	22.8056	1,59211801649645e-11	1,14172704895779e-09	0	0	0	0	404.768	0	38.7037	0
CL.21945	CL.21945.1	22.8077	1,58540829562564e-11	1,14172704895779e-09	0	0	0	0	0	32.0825	400.86	0
CL.33773	CL.33773.1	22.8071	1,58742877694047e-11	1,14172704895779e-09	0	0	0	0	34.0215	0	398.096	0
CL.15407	CL.15407.1	22.7832	1,65749511981241e-11	1,18388287791236e-09	0	0	0	0	674.323	0	463.063	0
CL.3220	CL.3220.1	22.7865	1,65551407753745e-11	1,18388287791236e-09	0	0	0	0	376.853	49.8303	0	0
CL.2216	CL.2216.1	1.73434	1,69181669647937e-11	1,20624724248983e-09	95.2473	109.966	152.305	101.761	307.066	431.408	382.891	415.181
CL.25147	CL.25147.1	22.7581	1,754275604041e-11	1,24855814305369e-09	0	0	0	0	383.832	0	34.5569	0
CL.26744	CL.26744.2	22.7442	1,79633909020149e-11	1,27622885362365e-09	0	0	0	0	561.791	0	265.397	0
CL.24765	CL.24765.1	1.90761	1,81026925887782e-11	1,28384936642892e-09	301.885	147.333	292.24	310.476	942.133	924.25	957.918	1120.07
CL.9076	evm.model.group12.1174	-4.8203	1,85928180445813e-11	1,31627953895119e-09	1666.02	2696.83	2496.41	724.791	23.5533	30.0347	172.785	44.0145
CL.33847	CL.33847.1	22.7251	1,87597753609714e-11	1,32575696422244e-09	0	0	0	0	377.726	0	30.4101	0
CL.31501	CL.31501.1	22.7165	1,89824846948414e-11	1,33913408753925e-09	0	0	0	0	539.11	0	523.883	0
CL.5859	CL.5859.1	22.7103	1,93338132926134e-11	1,36152179021972e-09	0	0	0	0	0	42.3216	362.156	0
CL.28534	CL.28534.1	22.7007	1,97147676103466e-11	1,38591357569577e-09	0	0	0	0	359.406	0	0	42.0437
CL.17295	CL.17295.1	22.6959	1,98116270298475e-11	1,39028352904727e-09	0	0	0	0	0	245.738	568.116	0
CL.3086	CL.3086.1	22.6951	1,99385134615797e-11	1,39674166854108e-09	0	0	0	0	364.641	0	0	34.1605
CL.30953	CL.30953.1	22.6901	2,01422023631018e-11	1,40609416147995e-09	0	0	0	0	38.3832	0	359.392	0
CL.5827	CL.5827.1	22.6901	2,01422023631018e-11	1,40609416147995e-09	0	0	0	0	38.3832	0	359.392	0
CL.26520	CL.26520.1	22.6798	2,04694595565453e-11	1,42645433814047e-09	0	0	0	0	575.748	0	236.369	0
CL.9402	CL.9402.1	22.675	2,07680203383307e-11	1,44474752596686e-09	0	0	0	0	362.023	0	0	30.8758
CL.21259	CL.21259.1	9.86292	2,09082708635071e-11	1,45198338561652e-09	0	0	0	0	170.107	36.1782	344.187	193.138
CL.6787	CL.6787.1	22.6426	2,21194332281321e-11	1,5334354488776e-09	0	0	0	0	404.768	124.917	0	0
evm.TU.group1.1691	evm.model.group1.1691	22.6375	2,22748424971798e-11	1,54154220874265e-09	0	0	0	0	798.196	0	234.987	0
CL.34378	CL.34378.1	22.6352	2,23794332526059e-11	1,5461101559171e-09	0	0	0	0	0	0	803.103	227.299
CL.4375	CL.4375.1	-2.97181	2,26527293408749e-11	1,56229752958495e-09	342.244	415.308	392.746	215.983	47.979	49.8303	17.9696	56.4962
CL.14468	CL.14468.1	22.6284	2,28258525988473e-11	1,57153249765603e-09	0	0	0	0	347.194	34.1303	0	0
CL.3391	CL.3391.2	-1.6034	2,34936048667309e-11	1,6147319845796e-09	3362.71	2172.63	2163.2	1865.97	731.898	657.35	917.832	840.873
CL.2735	CL.2735.1	22.605	2,39366206108142e-11	1,6423636778687e-09	0	0	0	0	344.577	0	29.0278	0
CL.9175	CL.9175.1	22.5858	2,48822337554409e-11	1,70432667791542e-09	0	0	0	0	336.725	0	31.7924	0
CL.6010	CL.6010.1	9.85637	2,68824083387871e-11	1,83818788760273e-09	0	0	0	0	396.917	140.617	44.2328	157.664
CL.30130	CL.30130.1	22.5378	2,74026031822593e-11	1,87056611501385e-09	0	0	0	0	341.087	0	0	34.8174
CL.7677	CL.7677.1	22.533	2,76840299462178e-11	1,88656306113087e-09	0	0	0	0	27.9151	0	0	327.152
CL.12175	CL.12175.1	22.5212	2,81865673179979e-11	1,91754796677789e-09	0	0	0	0	715.324	0	0	57.1531
CL.32703	CL.32703.7	8.73281	2,90434327703683e-11	1,97249212052315e-09	0	0	0	0	94.2133	70.9911	48.3797	125.474
CL.23270	CL.23270.1	9.86873	3,22903788903603e-11	2,18929861613661e-09	0	0	0	0	360.279	45.0521	241.898	99.1968
evm.TU.group2.334	evm.model.group2.334	22.4416	3,3071261923754e-11	2,23845517784598e-09	0	0	0	0	0	0	494.855	275.255
CL.12586	CL.12586.1	-3.05206	3,34104167976027e-11	2,25759764094425e-09	109.777	206.052	126.792	156.796	25.298	11.6043	23.4987	13.1386
CL.4382	CL.4382.1	-8.569	3,78453156861993e-11	2,55296599250169e-09	4523.44	6812.54	8984.46	2893.97	8.72346	0	0	51.8976
CL.28820	CL.28820.1	1.68123	3,89249291942661e-11	2,62138136607436e-09	707.09	560.505	622.364	379.009	2303.87	1532.45	1794.19	1641.02
CL.1040	CL.1040.1	22.3449	4,01566499167081e-11	2,69979356067532e-09	0	0	0	0	571.386	0	0	68.3209
CL.33630	CL.33630.1	9.50428	4,02589431533418e-11	2,70213710578628e-09	0	0	0	0	285.257	68.2607	165.873	60.4378
CL.12877	CL.12877.1	-2.8903	4,03856607573804e-11	2,70610940894353e-09	818.481	595.737	1605	1435.04	140.448	89.4215	215.635	157.007
CL.14488	evm.model.group3.46	-8.13882	4,09706718917826e-11	2,74072591436349e-09	66.1888	46.9757	96.6403	83.0705	0	0	0	0.656932
CL.17881	CL.17881.1	22.3169	4,24678968583558e-11	2,8361477118572e-09	0	0	0	0	546.961	90.7867	0	0
CL.3619	CL.3619.1	1.4503	4,67514450248894e-11	3,11702229974595e-09	1031.58	772.964	766.164	640.682	2371.91	2290.83	2468.75	1636.42
CL.11787	CL.11787.1	22.256	4,79447961636531e-11	3,19127571806907e-09	0	0	0	0	436.173	183.621	0	0
CL.1073	CL.1073.1	22.2192	5,15704243024074e-11	3,42691028490459e-09	0	0	0	0	349.811	0	0	291.678
CL.3189	CL.3189.1	9.78147	5,29744539491092e-11	3,51438140685564e-09	0	0	0	0	307.938	31.3999	153.433	209.561
CL.24783	CL.24783.4	-0.727896	5,33152572275855e-11	3,53114439191628e-09	868.526	735.597	813.325	778.786	468.45	459.394	523.883	480.217
CL.4114	CL.4114.1	22.1339	6,11413145910188e-11	4,04279286412892e-09	0	0	0	0	444.024	0	0	72.2625
CL.26335	CL.26335.1	22.1302	6,16740972979716e-11	4,07130325985127e-09	0	0	0	0	49.7237	0	378.744	0
CL.8641	CL.8641.1	22.081	6,76941370278078e-11	4,46135537944779e-09	0	0	0	0	674.323	0	0	124.817
CL.3219	CL.3219.2	10.1165	6,89687954692773e-11	4,53789759352043e-09	0	0	0	0	200.64	200.004	457.533	28.2481
CL.7753	CL.7753.1	22.0617	7,03309975727603e-11	4,61993946350903e-09	0	0	0	0	0	131.743	664.875	0
CL.28345	evm.model.group7.1525	22.0473	7,24635892266500e-11	4,75223571245805e-09	0	0	0	0	457.109	0	138.228	0
CL.33141	CL.33141.1	-1.23863	7,46504246979449e-11	4,88765117262525e-09	2479.66	3629.94	3823.09	4156.64	1571.97	1404.8	1382.28	1612.77
CL.30160	evm.model.group8.827	-0.707434	7,59049184634803e-11	4,96168039613647e-09	8665.89	8404.38	9008.42	8303.94	5211.39	4839.68	4806.17	6193.56
CL.6999	CL.6999.1	-10.0858	8,08504251823926e-11	5,27634615156103e-09	193.723	35.2318	370.326	86.1857	0	0	0	0
CL.6875	evm.model.group11.425	-6.66057	8,50533247357928e-11	5,54160442628166e-09	132.378	330.965	960.991	223.252	0	3.41303	11.0582	2.62773
CL.8163	CL.8163.1	21.957	8,64208162015964e-11	5,62156185908761e-09	0	0	0	0	627.217	0	113.347	0
CL.8294	CL.8294.1	21.8467	1,0720743328387e-10	6,96240170451322e-09	0	0	0	0	703.983	0	89.848	0
CL.12906	CL.12906.3	-1.65948	1,1118180130402e-10	7,20882650202605e-09	2261.72	4646.32	3586.51	3445.35	877.58	1176.13	1058.82	1300.07
CL.10978	CL.10978.1	21.8259	1,12183748082452e-10	7,26204004146015e-09	0	0	0	0	351.555	0	29.0278	0
CL.19621	CL.19621.1	21.7867	1,20713679484673e-10	7,80160828540461e-09	0	0	0	0	456.237	0	0	117.591
CL.29235	CL.29235.1	21.7622	1,26627015811448e-10	8,17060309752774e-09	0	0	0	0	459.726	96.9302	0	0
CL.28768	CL.28768.1	9.10405	1,32903931667982e-10	8,56183366870746e-09	0	0	0	0	127.362	34.8129	176.931	100.511
CL.20889	CL.20889.1	21.7175	1,38198703018723e-10	8,87614403522164e-09	0	0	0	0	452.747	58.7042	0	0
CL.22992	CL.22992.1	-0.965304	1,38225951534273e-10	8,87614403522164e-09	471787	614598	588727	464709	265491	241454	262237	326771
CL.23266	CL.23266.1	-8.69512	1,41200297775907e-10	9,05263349100896e-09	74.2606	33.0965	71.1273	83.0705	0	0	0	0
CL.29536	CL.29536.1	3.76805	1,58219564656175e-10	1,01275686194456e-08	38.7446	90.7485	155.398	43.612	601.919	1374.77	1803.87	717.37
CL.31845	CL.31845.1	-1.74989	1,6923422479721e-10	1,08153355464501e-08	27355.3	40135.4	44245	48131.1	7212.55	15087	12159.9	13072.9
CL.30877	CL.30877.2	-1.61941	1,71313339933551e-10	1,09307731387538e-08	4187.65	7595.11	4883.04	6029.88	1712.41	2135.88	1356.01	2179.7
CL.23280	CL.23280.1	21.5972	1,74157317166966e-10	1,10945686786651e-08	0	0	0	0	446.641	0	0	215.474
CL.34468	CL.34468.1	21.5903	1,76472908547389e-10	1,12242372150697e-08	0	0	0	0	316.662	0	0	350.145
CL.8016	evm.model.group12.159	1.38827	1,77763633406037e-10	1,1288413297274e-08	858.84	761.22	1129.53	785.017	2549.87	1814.37	2796.35	2100.87
CL.23614	evm.model.group6.105	-2.66551	1,8732850943134e-10	1,18769831849902e-08	15108.8	22004.9	22276.7	13463.7	1505.67	1542.01	3998.93	4437.58
CL.15152	CL.15152.1	-1.28146	2,10839974103037e-10	1,33465367493028e-08	418.119	332.033	286.828	328.129	143.937	139.934	124.405	149.781
CL.12313	CL.12313.1	21.4921	2,13359854941338e-10	1,34847466679801e-08	0	0	0	0	498.982	0	0	93.2844
CL.8503	CL.8503.1	21.4747	2,20687161148431e-10	1,39258811767207e-08	0	0	0	0	446.641	0	0	116.934
CL.20282	CL.20282.1	-3.71833	2,27825447673912e-10	1,43311863238519e-08	760.364	746.273	836.518	736.213	33.1491	15.0174	102.288	84.7442
CL.12966	evm.model.group2.1538	-2.53563	2,27563271634309e-10	1,43311863238519e-08	1123.59	1249.13	577.522	1126.64	239.895	221.847	139.61	101.168
CL.29679	CL.29679.1	21.4353	2,37956810868923e-10	1,49450304255764e-08	0	0	0	0	484.152	0	0	105.109
CL.33942	evm.model.utg535_4499152_4864212__.3	-1.78642	2,40172482810812e-10	1,50605811991068e-08	6391.25	8292.28	8076.04	11967.4	2185.23	3513.38	1777.61	2588.31
CL.27030	CL.27030.6	9.31318	2,47147941335722e-10	1,54737781395662e-08	0	0	0	0	253.853	144.03	49.7619	59.7808
CL.32091	CL.32091.1	9.3959	2,50859985652109e-10	1,56816842824961e-08	0	0	0	0	235.533	79.865	35.9392	185.912
CL.2847	evm.model.group1.2302	0.993086	2,55262116548108e-10	1,59320140343967e-08	17331.8	17153.6	25094	23128.9	41894.4	40449.2	38453.5	43839.7
CL.3867	CL.3867.1	21.3906	2,59432172573644e-10	1,61671028849548e-08	0	0	0	0	415.237	0	93.9948	0
CL.31036	evm.model.group8.1477	-6.89389	2,81836383441232e-10	1,75359998206369e-08	6646.32	9036.41	19892.4	7228.18	0	61.4346	63.5847	234.525
CL.14851	evm.model.group3.504	-10.0408	2,83583232919665e-10	1,76173335551798e-08	400.361	46.9757	51.7992	166.141	0	0	0	0
CL.4402	evm.model.group1.3299	1.08324	2,8863143703524e-10	1,79031914582075e-08	2051.85	1778.67	2808.75	2421.51	4668.79	4351.62	5101.98	5085.97
CL.4667	CL.4667.1	-2.6345	3,02084296289625e-10	1,87086827702091e-08	5545.33	10941.1	10551.6	8646.61	620.238	1080.57	1926.89	2119.92
CL.4839	CL.4839.1	-2.39287	3,07651050698777e-10	1,90240395084876e-08	771.664	882.929	1339.82	880.548	139.575	122.869	170.02	304.817
CL.18500	evm.model.group4.515	2.9337	3,35256893387733e-10	2,06991428629375e-08	79.1037	145.198	343.266	130.836	1416.69	1325.62	1552.3	1062.92
CL.8087	evm.model.group12.181	-3.14839	3,41099962582968e-10	2,1027500770307e-08	7040.23	7761.66	20525.6	8868.82	872.346	544.72	2033.33	1535.91
CL.15814	CL.15814.1	21.1811	3,86629566144617e-10	2,37976140021733e-08	0	0	0	0	39.2556	0	467.209	0
CL.14551	CL.14551.1	-8.64374	4,3115291226452e-10	2,64973883350296e-08	32.2872	68.3283	57.9842	93.4544	0	0	0	0
CL.34183	evm.model.utg550_7040347_7062877__.1	-7.55436	4,35024620392728e-10	2,66943897995966e-08	116.234	71.5312	69.581	57.111	0	1.36521	0	0
CL.22338	CL.22338.1	-0.87718	5,33810197442116e-10	3,27060773876232e-08	10712.9	13368.9	9668.67	11215.6	6289.61	6494.32	5168.33	6522.68
CL.22250	evm.model.group5.930	-4.00935	5,38451120292846e-10	3,2940055557457e-08	343.859	953.393	876.721	591.878	13.0852	21.8434	78.7898	59.1239
CL.20125	CL.20125.3	8.63755	5,44168598394365e-10	3,32390788683875e-08	0	0	0	0	130.852	89.4215	58.0556	39.4159
CL.11879	evm.model.group2.783	2.37822	5,47492157069405e-10	3,33911883314628e-08	690.946	485.771	404.343	371.741	2938.06	3043.74	3025.8	1135.84
CL.3685	CL.3685.1	-1.51078	5,4932353062578e-10	3,34519663710866e-08	2571.68	1994.33	1932.03	1532.65	600.174	557.007	780.986	879.632
CL.14956	evm.model.group3.586	-10.0041	5,51179199866061e-10	3,35140372361655e-08	109.777	103.56	405.116	29.0747	0	0	0	0
CL.12359	CL.12359.2	-9.58509	5,58815902860638e-10	3,3926898829736e-08	298.657	62.9901	51.0261	72.6867	0	0	0	0
CL.30247	CL.30247.1	9.2747	5,73313276092472e-10	3,4754406918344e-08	0	0	0	0	88.1069	67.5781	286.131	53.2115
CL.176	CL.176.1	9.09859	5,75527641690618e-10	3,48342315315763e-08	0	0	0	0	27.0427	122.869	113.347	174.087
CL.20300	evm.model.group4.1704	8.48642	5,76368742336787e-10	3,48342315315763e-08	0	0	0	0	45.362	108.534	87.0834	45.3283
CL.7262	evm.model.group11.712	0.916932	6,0366171028694e-10	3,64288023060206e-08	747.449	758.017	1039.85	877.433	1545.8	1595.93	1712.64	1621.31
CL.21866	CL.21866.2	-1.78744	6,05524139880794e-10	3,64862440376292e-08	164.665	180.429	213.382	223.252	61.0642	47.7825	44.2328	72.2625
CL.20270	CL.20270.1	1.20901	6,1024416908969e-10	3,67154412243601e-08	416.505	478.298	495.571	562.803	1033.73	1311.97	1277.22	899.997
CL.20290	CL.20290.1	-3.51174	6,13113891935445e-10	3,6832794077741e-08	600.542	387.549	179.364	310.476	45.362	43.0042	12.4405	27.5911
CL.21891	CL.21891.1	3.33043	6,23064390402347e-10	3,73745361129072e-08	69.4175	50.1786	73.4466	19.7293	517.301	734.485	634.465	252.262
CL.878	CL.878.1	8.94527	7,20602689452496e-10	4,31607619826031e-08	0	0	0	0	149.171	27.3043	111.964	105.109
CL.7158	CL.7158.1	-1.08521	7,33997515533007e-10	4,38974335035934e-08	38434.7	53745.5	38897.3	46945.2	23660.6	18388.1	24323.9	17538.8
CL.25503	CL.25503.1	-4.56067	7,47943562317509e-10	4,46648264412259e-08	1062.25	1048.41	490.933	413.276	30.5321	15.7	76.0252	7.22625
CL.4865	CL.4865.6	-1.32101	7,57230475907506e-10	4,51521207881157e-08	1635.35	1700.73	2058.82	1273.06	744.983	523.559	745.047	658.246
CL.6150	evm.model.group10.1323	9.15089	7,71674538606728e-10	4,59450204486948e-08	0	0	0	0	239.895	42.3216	63.5847	107.737
CL.9433	CL.9433.1	9.10079	8,59891507423756e-10	5,11214431787387e-08	0	0	0	0	38.3832	71.6737	229.458	99.1968
CL.4384	CL.4384.5	-6.29714	8,80834770881044e-10	5,22889618803014e-08	4521.82	4277.99	4996.69	1363.4	0	28.6695	82.9366	81.4596
CL.7353	CL.7353.1	1.53219	9,91087796681969e-10	5,87468757589445e-08	127.534	135.589	139.162	100.723	334.108	308.538	478.268	338.32
CL.2695	CL.2695.1	1.63783	1,02246427081121e-09	6,05171984215734e-08	812.023	577.587	474.697	386.278	1483.86	1943.38	1852.25	1711.31
CL.20768	evm.model.group5.113	-1.58692	1,08103354135181e-09	6,38894011828421e-08	5532.41	11314.7	9466.11	12205.1	3633.32	3329.07	2801.87	3058.02
CL.4384	CL.4384.1	-6.67349	1,19721321906713e-09	7,06514487305152e-08	11470	15160.3	19450.2	6595.8	0	101.708	95.3771	318.612
CL.14140	CL.14140.4	3.55738	1,21427104901005e-09	7,15527072556365e-08	41.9734	13.8792	34.0174	19.7293	140.448	437.551	469.974	235.839
CL.24867	CL.24867.1	0.76294	1,23544729409941e-09	7,26936462181548e-08	5966.68	5184.41	6609.42	4956.2	9071.52	9100.51	9855.63	10523.4
CL.11492	CL.11492.2	1.90374	1,24624503966625e-09	7,31517733788877e-08	53.2739	43.7728	89.6822	71.6483	216.342	251.199	251.574	255.547
CL.22220	CL.22220.1	-7.66573	1,24688448259996e-09	7,31517733788877e-08	319.643	447.337	351.771	178.602	0	0	0	5.91239
CL.22951	CL.22951.1	0.62951	1,25438008107755e-09	7,34839325274523e-08	545.654	609.616	578.296	587.724	937.772	849.163	843.189	961.749
CL.4321	CL.4321.1	1.05091	1,29330095924881e-09	7,56533860395619e-08	114.62	117.439	106.691	99.6847	242.512	212.973	218.4	231.897
CL.24305	CL.24305.2	-0.997571	1,30750750191537e-09	7,62617548788195e-08	673.188	783.64	550.463	738.29	331.491	338.573	356.627	348.174
CL.32605	evm.model.group9.870	-2.55142	1,30729148235147e-09	7,62617548788195e-08	4899.58	8267.72	11187.9	7233.37	631.578	1131.08	1339.43	2286.12
CL.14467	CL.14467.2	-9.10469	1,33496659494587e-09	7,77501620050596e-08	100.09	67.2606	25.513	154.719	0	0	0	0
CL.14158	CL.14158.1	2.84145	1,36384333072796e-09	7,93166941397233e-08	19.3723	23.4878	31.698	28.0363	180.576	253.247	218.4	89.9997
CL.12906	evm.model.group2.1521	-1.49687	1,39540239563267e-09	8,10344550623203e-08	28625.8	20841.2	18509.3	21369.9	8914.5	9792.68	4977.58	7967.27
CL.5898	CL.5898.1	-2.12831	1,40080267032979e-09	8,12303371926406e-08	255.069	313.883	378.83	364.472	45.362	77.1346	69.1138	107.737
CL.11142	CL.11142.1	8.88214	1,47200888253472e-09	8,52361212762521e-08	0	0	0	0	160.512	27.3043	99.5239	89.3428
evm.TU.group5.473	evm.model.group5.473	-8.4046	1,49953428290526e-09	8,67046734718811e-08	59.7313	68.3283	27.8324	58.1494	0	0	0	0
CL.26909	evm.model.group7.624	-2.01755	1,54890371968459e-09	8,94302190889935e-08	9193.78	9285.17	11190.2	9635.15	1503.05	1866.25	2088.62	4247.72
CL.5147	CL.5147.2	-7.15568	1,62440928436889e-09	9,36547914023903e-08	72.6462	114.236	94.3209	52.9575	0	0	0	1.9708
CL.12191	CL.12191.1	-8.99556	1,71702807979742e-09	9,87106386764455e-08	64.5744	26.6907	148.439	82.0322	0	0	0	0
CL.18621	evm.model.group4.561	2.22628	1,71656872277743e-09	9,87106386764455e-08	689.332	295.733	351.771	710.253	2825.53	2880.6	2125.94	1736.93
CL.25525	CL.25525.1	-3.29867	1,77820675506436e-09	1,02081296096603e-07	129066	239612	78244.6	101776	27314	8590.61	15079.3	4778.52
CL.17954	evm.model.group4.151	-5.55427	1,85768121662129e-09	1,06491110658105e-07	163.05	356.588	120.607	233.636	5.23407	0	11.0582	3.28466
CL.12205	CL.12205.1	-1.30602	1,8736555005401e-09	1,07253394152345e-07	1191.4	2091.49	1601.14	2004.08	692.643	651.207	682.845	760.07
CL.5920	CL.5920.2	-1.88031	1,93906825108437e-09	1,10839464794509e-07	1657.95	1909.99	1671.49	2629.18	666.472	530.386	299.954	637.881
CL.16932	CL.16932.2	9.04218	1,97097748626646e-09	1,12502945690452e-07	0	0	0	0	169.235	27.9869	156.197	67.664
CL.2191	CL.2191.1	9.62221	2,02017512614102e-09	1,1514710854121e-07	0	0	0	0	356.789	28.6695	71.8784	171.459
CL.2642	CL.2642.1	-2.38218	2,03515129383468e-09	1,15835955034028e-07	4894.74	2332.77	3009.77	2013.42	523.407	322.19	787.898	717.37
CL.10669	CL.10669.1	-3.50436	2,04202858129613e-09	1,16062532273101e-07	2957.51	3402.53	4663.47	2231.48	93.341	126.282	402.242	546.568
CL.14362	CL.14362.3	6.81255	2,06115833162886e-09	1,16983873014686e-07	0	14.9468	0	14.5373	861.878	1187.05	884.657	401.386
CL.18760	CL.18760.1	1.27437	2,11519281311443e-09	1,19711877536351e-07	435.877	271.178	344.039	272.056	792.09	772.711	879.128	749.56
CL.20270	evm.model.group4.1677	1.029	2,11519863478255e-09	1,19711877536351e-07	1212.38	1349.48	1383.89	1790.17	2589.99	3104.5	3329.9	2688.82
CL.34760	CL.34760.2	3.27364	2,15999674927879e-09	1,22074851542456e-07	12.9149	4.27052	22.4205	18.6909	127.362	123.552	165.873	154.379
CL.29897	CL.29897.1	-2.43065	2,19398606440555e-09	1,23821157184127e-07	161.436	161.212	150.759	168.218	47.979	17.7478	30.4101	23.6496
CL.18174	CL.18174.1	-1.91571	2,24900469267728e-09	1,2674770469139e-07	2959.12	2442.74	3022.14	3983.23	514.684	758.376	1286.9	731.822
CL.4969	CL.4969.1	-2.83338	2,33502469618186e-09	1,31410729741583e-07	1898.49	3079.04	3868.7	3253.25	212.852	296.251	340.04	847.442
CL.27609	CL.27609.1	-2.42701	2,4719384250795e-09	1,3892085931688e-07	2242.35	2071.2	1632.06	1120.41	368.13	524.242	182.46	237.152
CL.23265	evm.model.group5.1796	1.12916	2,50030582020960e-09	1,40318283215404e-07	16739.3	18361.1	16794.5	16647.3	50171.2	27345.2	36687	35721.3
CL.7123	CL.7123.2	-3.9568	2,56806466443591e-09	1,43919372173352e-07	2072.84	3729.23	614.632	1824.44	245.129	96.2476	40.086	148.467
CL.4384	CL.4384.4	-6.65348	2,66117532641284e-09	1,48929183420898e-07	8042.74	9149.58	14015.2	3773.48	0	25.2565	174.167	148.467
CL.12188	evm.model.group2.1063	-0.72389	3,07247908414144e-09	1,71707443377333e-07	3304.6	3726.03	3802.22	3677.95	1865.08	2269.67	2149.44	2500.94
CL.22226	CL.22226.8	-2.8053	3,07781995428199e-09	1,71766358729915e-07	598.928	794.316	1095.51	953.235	50.5961	88.7389	194.901	159.635
CL.14105	CL.14105.3	1.86697	3,1601321915757e-09	1,76114738409511e-07	12299.8	6208.26	14244.8	8339.24	25125.3	35105.1	41436.5	48222.8
CL.2642	evm.model.group1.2202	-2.11454	3,43519543857375e-09	1,91178168366181e-07	4794.65	6006.48	7709.58	4967.62	795.579	896.945	1700.2	2029.92
CL.25567	evm.model.group6.1145	-8.98001	3,47735521909188e-09	1,93256066059656e-07	133.992	29.8936	114.422	40.4969	0	0	0	0
CL.26641	CL.26641.1	-2.27144	3,52219446958979e-09	1,95476914676541e-07	200.181	235.946	191.734	163.026	20.9363	45.7347	55.2911	42.7006
CL.14470	evm.model.group3.42	-1.68513	3,75295427092767e-09	2,07995681377693e-07	734.534	400.361	448.411	415.353	159.639	138.569	178.314	145.182
CL.27280	evm.model.group7.839	1.59452	4,05072939583952e-09	2,24188849297361e-07	288.971	212.458	315.434	164.064	671.706	701.72	874.981	714.742
CL.17040	CL.17040.1	-3.48704	4,31078049731332e-09	2,38252378658406e-07	246.997	134.521	237.349	258.557	6.97877	15.0174	40.086	17.7372
CL.301	CL.301.2	1.0666	4,39872039924058e-09	2,42777860051749e-07	269.598	213.526	218.794	204.561	496.365	410.929	539.088	448.685
CL.16402	CL.16402.2	-8.1865	4,46836132358054e-09	2,4628230843999e-07	799.108	625.631	803.274	1469.31	0	12.2869	0	0
CL.15243	CL.15243.2	0.915634	4,5434319738449e-09	2,50075987901051e-07	506.909	704.635	558.194	500.5	1108.75	1070.33	1087.85	1020.22
CL.10921	CL.10921.3	-5.83431	4,56643405028173e-09	2,50653441636697e-07	37.1303	62.9901	59.5304	100.723	0	2.04782	0	1.9708
CL.15676	evm.model.group3.1160	-1.41901	4,56325885442498e-09	2,50653441636697e-07	19013.9	14177	10604.1	12813.6	4021.51	5028.08	5209.8	6907.64
CL.32940	evm.model.group9.1263	-2.29542	4,59446764167836e-09	2,51847220796241e-07	607	895.741	753.021	549.304	86.3622	213.656	95.3771	174.087
CL.16925	CL.16925.1	10.0005	4,66809423804354e-09	2,55533519287438e-07	0	0	0	0	365.513	45.0521	26.2633	380.364
CL.16243	CL.16243.1	8.28228	4,80174431566497e-09	2,62490988715819e-07	0	0	0	0	47.1067	38.9086	52.5265	109.708
CL.4683	CL.4683.3	8.55457	4,81768765021449e-09	2,63003738615933e-07	0	0	0	0	118.639	81.9128	74.6429	24.9634
CL.32541	CL.32541.2	-9.21196	5,32252943160476e-09	2,9016837323048e-07	175.965	48.0433	23.9668	126.683	0	0	0	0
CL.12966	CL.12966.1	-2.29764	5,54756025424132e-09	3,02025461124252e-07	253.455	560.505	245.853	446.504	59.3195	73.7215	92.6125	81.4596
CL.4093	CL.4093.1	-6.3279	5,81089363710481e-09	3,15932846728344e-07	253.455	233.811	62.6229	92.416	0	4.77825	0	2.62773
CL.1240	CL.1240.1	10.377	5,96187178420085e-09	3,2370217126413e-07	0	0	0	0	744.983	19.113	230.84	66.3501
CL.12547	evm.model.group2.1280	0.75676	6,22612790309365e-09	3,37592618507392e-07	734.534	736.664	751.475	807.861	1410.58	1301.73	1062.97	1340.8
CL.29754	evm.model.group8.487	1.3114	6,58794055836643e-09	3,56728078613166e-07	513.367	531.679	475.47	309.438	1136.67	1108.55	1303.49	991.968
CL.23364	CL.23364.1	-3.93347	6,61103608966589e-09	3,57495568303525e-07	1112.29	319.221	627.002	197.293	33.1491	34.8129	64.967	15.7664
CL.21859	CL.21859.1	8.41772	6,64918513395908e-09	3,59073919565688e-07	0	0	0	0	51.4684	27.9869	88.4657	105.109
CL.24046	evm.model.group6.342	-1.47274	6,71803532490591e-09	3,62303735489878e-07	1289.87	1455.18	1646.75	1200.37	417.854	415.025	456.151	724.596
CL.10942	CL.10942.1	-9.89903	6,78239742646164e-09	3,65283151718169e-07	240.54	8.54103	149.986	203.523	0	0	0	0
CL.16111	CL.16111.1	6.28375	7,06831128065318e-09	3,80170782571507e-07	0	0	7.73122	1.03838	130.852	198.639	160.344	260.802
CL.8581	CL.8581.1	9.18713	8,1257742033939e-09	4,36460820817686e-07	0	0	0	0	281.768	56.6564	93.9948	32.8466
CL.33315	CL.33315.2	0.912384	8,26568478780787e-09	4,4338151197786e-07	1281.8	1158.38	1029.03	1034.23	2339.63	1704.47	2101.06	2323.57
CL.1288	evm.model.group1.1076	2.78618	9,13081567666788e-09	4,8913340128888e-07	41.9734	20.285	32.4711	19.7293	97.7027	229.356	226.693	229.926
CL.16845	evm.model.group3.2202	-1.75539	9,2191627931266e-09	4,9320674648943e-07	2205.22	2883.67	3409.47	2327.01	568.769	961.11	561.204	1112.84
CL.3152	CL.3152.2	-1.07892	9,33716513030404e-09	4,98853609028377e-07	368.074	395.023	404.343	488.039	169.235	185.669	225.311	206.277
CL.20814	evm.model.group5.135	-0.656145	9,37990030497437e-09	5,00469514274731e-07	96391.8	127444	107472	104881	77068.3	67930.3	65656.7	66139.3
CL.709	CL.709.1	-3.7725	9,92578627324338e-09	5,28891297830934e-07	369.689	130.251	190.961	186.909	5.23407	27.9869	9.67593	20.3649
CL.7661	evm.model.group11.1054	-8.58461	1,02857371560247e-08	5,47343277346493e-07	103.319	49.1109	67.2616	22.8444	0	0	0	0
CL.16571	CL.16571.3	8.68586	1,02999352202075e-08	5,47371888957181e-07	0	0	0	0	116.894	27.9869	138.228	45.9852
CL.22931	CL.22931.3	-2.16897	1,0616465245333e-08	5,63446042888069e-07	237.311	420.646	388.107	409.122	120.384	59.3868	56.6733	86.715
CL.10672	CL.10672.1	0.925222	1,06649395069587e-08	5,65270007994491e-07	1241.44	1131.69	964.084	1174.41	2023.84	2535.88	1776.23	2219.12
CL.5083	CL.5083.1	-1.42071	1,0773464293142e-08	5,70267786296167e-07	587.627	447.337	604.582	488.039	155.278	169.286	257.103	215.474
CL.18053	CL.18053.1	1.32306	1,10889233649841e-08	5,86191502948436e-07	726.462	1001.44	607.674	531.652	1646.12	1879.9	1849.49	1795.4
CL.11816	CL.11816.1	1.42288	1,13456467824438e-08	5,98972419726642e-07	164.665	158.009	138.389	134.99	278.278	472.364	406.389	436.86
CL.26893	CL.26893.1	7.70393	1,22192017746267e-08	6,44241335670122e-07	0	0	0	0	47.979	45.0521	31.7924	41.3867
CL.27766	evm.model.group7.1065	-4.27609	1,22931750430468e-08	6,47289781832961e-07	1714.45	1381.51	1376.93	1582.49	4.36173	82.5954	96.7593	128.759
CL.28267	CL.28267.1	1.227	1,24210474903952e-08	6,53164531417499e-07	205.024	168.685	183.23	140.182	373.364	372.703	387.037	493.356
CL.4786	CL.4786.1	9.10743	1,30491311101276e-08	6,85293163280227e-07	0	0	0	0	165.746	23.2086	200.43	51.2407
CL.20924	CL.20924.1	-0.678046	1,32788944815465e-08	6,96446730203623e-07	1866.2	2175.83	2019.4	1739.29	1195.99	1105.14	1253.72	1323.06
CL.30573	CL.30573.2	8.22856	1,34764162091011e-08	7,0496083224371e-07	0	0	0	0	105.554	42.3216	59.4379	32.1897
CL.31034	CL.31034.1	-4.50119	1,34679051857652e-08	7,0496083224371e-07	1057.41	1134.89	3168.26	733.098	88.1069	7.50868	49.7619	123.503
CL.34073	evm.model.utg548_4040903_4386744__.17	1.34235	1,44555138597021e-08	7,55192229932547e-07	752.292	468.689	565.926	444.427	1199.48	1454.64	1291.05	1702.11
CL.3395	evm.model.group1.2729	2.24445	1,49946749066639e-08	7,82339353528673e-07	209.867	154.806	320.073	144.335	652.515	849.163	1491.48	942.041
CL.4358	CL.4358.1	9.72312	1,58594963893064e-08	8,26384941897929e-07	0	0	0	0	482.407	48.4651	31.7924	111.678
CL.12778	CL.12778.1	2.05648	1,5911704619731e-08	8,28028576769638e-07	59.7313	70.4635	37.883	57.111	195.405	191.813	210.106	334.378
CL.4383	CL.4383.1	-7.68502	1,60906759117832e-08	8,36256010097476e-07	3248.09	5242.06	8256.17	2154.64	70.66	0	0	21.0218
CL.3766	evm.model.group1.2914	0.938491	1,64280472924019e-08	8,52683750008478e-07	531.125	534.882	470.058	406.007	809.537	905.819	930.272	1070.8
CL.2978	CL.2978.2	-2.91087	1,67090083313832e-08	8,65253644688636e-07	2541	1592.9	1185.2	830.705	251.236	73.7215	214.253	278.539
CL.26205	evm.model.group7.43	2.23632	1,67134095579986e-08	8,65253644688636e-07	83.9467	97.1543	70.3541	99.6847	685.664	386.355	265.397	315.327
CL.5948	CL.5948.1	-2.86865	1,74116646319703e-08	9,00239228132966e-07	259.912	921.364	923.881	668.718	96.8304	53.2433	89.848	139.927
CL.29891	CL.29891.1	9.80647	1,81075346041149e-08	9,35011484003717e-07	0	0	0	0	444.896	159.047	98.1416	12.4817
CL.16651	evm.model.group3.2078	-0.686242	1,8132571552485e-08	9,35099281992374e-07	1162.34	1031.33	1032.89	990.616	742.366	646.429	598.526	628.684
CL.13356	evm.model.group2.1821	-0.762362	1,89066656843531e-08	9,73766187624716e-07	1606.29	1540.59	1889.51	1699.83	1027.62	838.924	1018.74	1089.19
CL.11667	CL.11667.1	-0.470793	1,93684790558523e-08	9,96270803296535e-07	3746.93	3428.16	3173.67	3335.28	2364.93	2624.62	2442.48	2431.96
CL.14718	CL.14718.1	-1.74541	1,94493354074849e-08	9,99147268946054e-07	443.949	504.989	805.594	697.793	124.745	204.782	192.136	210.218
CL.23425	CL.23425.3	1.67693	1,9746510259778e-08	1,01311480935891e-06	145.292	325.627	281.417	239.866	963.07	790.459	735.371	693.063
CL.32610	CL.32610.2	-2.2509	1,99593853647419e-08	1,0227270736128e-06	9757.19	18277.8	21041.3	11292.4	1899.97	2011.64	3798.5	4973.63
CL.13214	CL.13214.2	-6.78675	2,01450435252772e-08	1,03092195920544e-06	853.997	332.033	766.937	710.253	19.1916	4.77825	0	0
CL.27665	CL.27665.1	-5.16377	2,0482445416062e-08	1,04685151507858e-06	322.872	382.211	355.636	276.21	6.97877	0	22.1164	9.19705
CL.12567	CL.12567.1	-3.02159	2,07030463968355e-08	1,05677843200153e-06	326.101	167.618	299.198	231.559	23.5533	12.2869	40.086	50.5838
CL.12205	evm.model.group2.1070	-1.80841	2,12993073866382e-08	1,08583110303129e-06	1076.78	2868.72	1789.78	1929.31	444.896	577.485	635.847	531.458
CL.21158	CL.21158.1	0.990596	2,16897822527302e-08	1,10433236958946e-06	305.114	395.023	395.066	369.664	658.621	683.289	884.657	695.691
CL.20516	CL.20516.1	1.78763	2,22048040013531e-08	1,12911991920586e-06	38.7446	46.9757	45.6142	33.2282	132.597	187.717	120.258	128.102
CL.1303	CL.1303.1	0.731763	2,22362058753612e-08	1,12928361143945e-06	803.951	746.273	872.855	679.102	1258.79	1204.8	1437.57	1256.71
CL.22600	CL.22600.2	7.80077	2,27762886814224e-08	1,15524795881594e-06	0	0	0	0	60.1919	29.3521	51.1442	37.4451
CL.10670	CL.10670.1	-3.24678	2,32737808081454e-08	1,17859506956285e-06	1314.09	1013.18	1233.13	613.684	46.2343	44.3694	164.491	185.255
CL.3179	CL.3179.1	8.09333	2,32954154003937e-08	1,17859506956285e-06	0	0	0	0	80.2558	58.7042	23.4987	55.1823
CL.7939	evm.model.group12.123	0.380834	2,34540755837317e-08	1,18512586209348e-06	3051.14	2938.12	2815.71	2674.87	3689.15	3889.49	3714.18	3642.03
CL.20283	evm.model.group4.1684	4.77319	2,37593270392737e-08	1,19903807866964e-06	0	13.8792	12.37	14.5373	228.555	108.534	533.559	266.714
CL.16249	CL.16249.6	-6.18669	2,63541422395529e-08	1,32831506860237e-06	142.064	54.4491	33.2443	99.6847	0	2.73043	0	1.31386
CL.12269	CL.12269.1	0.991306	2,65274668791335e-08	1,335371354079e-06	461.707	423.849	404.343	387.316	897.644	958.38	646.905	822.479
CL.24802	CL.24802.1	-1.8283	2,75055594225539e-08	1,38287047184659e-06	161.436	272.245	184.003	249.212	47.979	69.6259	51.1442	74.2333
CL.30780	evm.model.group8.1323	-0.97301	2,82881626290766e-08	1,42043443176328e-06	2657.24	3213.56	2235.87	2421.51	1241.35	1512.66	1136.23	1468.24
CL.9496	CL.9496.2	-0.791554	2,98325841301971e-08	1,49610969473967e-06	758.749	774.031	652.515	709.215	462.343	367.242	393.949	446.057
CL.5612	CL.5612.2	-3.99342	3,02375178949614e-08	1,51452167756388e-06	4588.01	1958.03	3100.22	3048.69	100.32	555.642	67.7315	72.2625
CL.30145	evm.model.group8.820	2.20879	3,08644357487263e-08	1,54399243502055e-06	154.979	102.492	119.061	148.489	494.62	1021.86	540.47	365.911
CL.22726	CL.22726.8	8.32096	3,16007625562809e-08	1,57885605440172e-06	0	0	0	0	66.2983	120.139	29.0278	39.4159
CL.18830	CL.18830.1	-1.71024	3,16988776021956e-08	1,58178583501865e-06	8518.98	20179.3	12133.4	9954.97	3343.7	3054.67	4327.91	4795.6
CL.20287	CL.20287.1	-1.87432	3,42069106022087e-08	1,70481456197824e-06	4408.82	4556.64	7946.15	4534.61	1015.41	1010.26	2112.12	1714.59
CL.1049	CL.1049.1	0.737996	3,44458196113158e-08	1,71458880972102e-06	371.303	361.926	449.957	372.779	649.898	610.251	651.052	690.436
CL.16651	CL.16651.1	-0.741851	3,45738143210621e-08	1,71882473926173e-06	1020.28	917.094	843.477	845.243	567.897	596.598	494.855	503.21
CL.25169	CL.25169.1	-9.37181	3,62575866554017e-08	1,80029925313748e-06	119.463	170.821	8.50435	119.414	0	0	0	0
CL.18204	evm.model.group4.360	2.67411	3,6506364196796e-08	1,81040843238319e-06	372.917	310.68	531.135	222.214	837.452	1894.92	3390.72	3052.11
CL.14509	CL.14509.1	9.83712	3,71963811513626e-08	1,83866180580967e-06	0	0	0	0	363.768	303.76	49.7619	12.4817
CL.28476	CL.28476.1	-2.8756	3,71347455507869e-08	1,83866180580967e-06	154.979	144.13	136.843	85.1473	29.6598	19.7956	8.29366	12.4817
CL.1746	evm.model.group1.1325	2.05016	3,72137440606849e-08	1,83866180580967e-06	80.718	182.565	122.926	146.412	818.26	432.773	447.858	512.407
CL.25295	CL.25295.1	-1.35815	3,88436526772145e-08	1,91682901819703e-06	907.271	1258.73	1213.03	1115.22	302.704	501.033	403.625	544.597
CL.18326	CL.18326.1	-2.33406	4,10936758069853e-08	2,02536726886335e-06	824.938	2213.2	1584.9	1104.84	386.449	341.303	156.197	250.948
CL.20853	CL.20853.1	2.35837	4,12556251863681e-08	2,03085122999726e-06	20.9867	27.7584	19.3281	17.6525	133.469	135.156	66.3493	102.481
CL.12201	evm.model.group2.1068	-1.50866	4,13525832359423e-08	2,03312639296222e-06	39474.3	45264.3	28386.7	40013	14228	18166.9	7831.98	13587.3
CL.26041	CL.26041.1	-0.687142	4,2082859893346e-08	2,06649533814507e-06	497.223	460.148	497.118	517.114	280.895	292.838	330.364	322.554
CL.9877	evm.model.group13.465	-1.48631	4,38867343156174e-08	2,15243750798873e-06	7910.37	14631.9	13852	10322.6	4522.24	4256.05	2781.14	5112.9
CL.24610	CL.24610.1	-2.85632	4,42832250585377e-08	2,1692283962049e-06	422.962	235.946	453.05	489.078	51.4684	34.8129	29.0278	104.452
CL.31130	CL.31130.1	-4.19227	4,49817879523615e-08	2,20075731776694e-06	227.625	337.371	263.635	362.395	1.74469	23.8912	31.7924	8.54012
CL.18208	CL.18208.1	-3.19436	4,53926107890762e-08	2,21814867599791e-06	121.077	213.526	208.743	170.295	34.8938	15.0174	5.52911	21.6788
CL.848	CL.848.1	1.56646	4,64422715291473e-08	2,26667700386472e-06	640.901	665.133	408.982	498.423	1877.29	2060.11	1062.97	1546.42
CL.7746	CL.7746.1	2.40924	4,72406709090324e-08	2,30107047045128e-06	322.872	77.9369	248.172	173.41	1163.71	1294.22	984.181	919.048
CL.8342	evm.model.group12.482	-2.95287	4,72618167502223e-08	2,30107047045128e-06	148.521	166.55	102.825	131.874	26.1704	25.9391	9.67593	8.54012
CL.34346	CL.34346.1	1.66838	4,87172898596437e-08	2,36618400566779e-06	293.814	379.008	241.214	320.86	1020.64	1228.69	1098.91	576.786
CL.5159	CL.5159.1	-0.977355	4,86781949660036e-08	2,36618400566779e-06	18001.7	18575.7	14516.1	18326.4	8924.97	10468.5	6426.2	9432.23
CL.13752	CL.13752.1	7.83635	4,94273784452608e-08	2,3977664095661e-06	0	0	0	0	43.6173	25.9391	70.4961	42.7006
CL.5346	evm.model.group10.555	-1.67094	5,04311465276454e-08	2,44350186380019e-06	607	1012.11	1102.47	944.928	246.002	339.938	200.43	363.283
CL.1706	CL.1706.2	2.47924	5,6003176715133e-08	2,71020204224079e-06	45.2021	24.5555	23.9668	23.8828	161.384	228.673	161.726	95.2552
CL.103	CL.103.1	9.49855	5,86646422996227e-08	2,83557565373448e-06	0	0	0	0	377.726	124.917	59.4379	15.1094
CL.18208	evm.model.group4.362	-3.12285	5,88971225653597e-08	2,84338277252285e-06	3115.72	3645.95	3700.94	2722.64	59.3195	443.012	515.589	495.984
CL.14218	CL.14218.1	-1.87869	6,23418775938181e-08	3,00606382091972e-06	3068.9	1229.91	1615.83	2237.71	599.302	631.411	613.731	372.481
CL.24061	CL.24061.1	1.68798	6,2419374299702e-08	3,0061830867657e-06	813.638	1482.94	1416.36	979.194	2271.59	4690.87	4397.02	3766.85
CL.7508	evm.model.group11.887	-1.49757	6,37279808866423e-08	3,06552244193008e-06	870.14	1271.55	1302.71	1036.31	331.491	476.46	276.455	499.925
CL.31743	CL.31743.1	9.864	6,38225115377059e-08	3,06638853395189e-06	0	0	0	0	520.79	169.286	17.9696	35.4743
CL.3833	CL.3833.1	-0.824575	6,68824628382813e-08	3,2095572286586e-06	85984.1	109325	86341.5	88229.2	46008.4	50512.9	47420.4	64906.9
CL.6350	evm.model.group11.76	3.07587	6,86724756897648e-08	3,29151447474746e-06	11.3005	8.54103	9.27747	4.15353	69.7877	102.391	51.1442	53.2115
CL.15470	CL.15470.2	-1.24713	6,98947468986914e-08	3,3460961866554e-06	1059.02	762.287	648.65	709.215	289.619	374.069	374.597	300.218
CL.20195	CL.20195.1	-2.04648	7,22032994089952e-08	3,4524895075399e-06	195.338	215.661	464.647	300.092	78.5111	64.8477	77.4075	65.0363
CL.9930	CL.9930.2	-1.79307	7,27749482023906e-08	3,47567601247889e-06	1349.61	1289.7	1431.05	1717.48	239.895	441.647	344.187	642.48
CL.12081	CL.12081.1	1.2455	7,50268794515824e-08	3,57739345107452e-06	1021.89	1229.91	1222.31	1594.95	3854.9	3150.23	2219.94	2795.9
CL.32854	CL.32854.1	-4.08506	7,50833015311622e-08	3,57739345107452e-06	750.678	235.946	211.062	107.992	8.72346	21.8434	34.5569	12.4817
CL.34723	CL.34723.1	9.52223	7,59118276685428e-08	3,61257355662531e-06	0	0	0	0	430.939	19.7956	67.7315	68.3209
CL.19866	CL.19866.1	-2.4517	7,62721295927532e-08	3,6254142737623e-06	621.529	345.912	223.432	253.365	70.66	66.2129	84.3189	43.3575
CL.20485	CL.20485.1	-1.18214	8,25671461659734e-08	3,91534384245036e-06	28729.2	22014.5	19427	14439.7	8024.71	10091.7	9435.42	9733.11
CL.7764	evm.model.group11.1111	1.58288	8,25449369003256e-08	3,91534384245036e-06	288.971	542.356	695.037	457.926	1421.05	1367.26	1762.4	1407.15
CL.7764	CL.7764.3	1.83794	8,31615979916318e-08	3,93887143206228e-06	100.09	58.7196	88.9091	130.836	328.874	255.295	348.334	419.78
CL.23046	CL.23046.2	8.13156	8,72166201026028e-08	4,12605663224474e-06	0	0	0	0	68.9153	43.6868	91.2302	20.3649
CL.6351	CL.6351.1	0.603363	8,86052896730248e-08	4,18680891179022e-06	763.592	762.287	841.93	674.948	1093.05	1123.57	1184.61	1225.18
CL.28959	CL.28959.1	-0.985153	9,28671241495843e-08	4,3830219843037e-06	63996.5	77158.6	56876.3	66063.9	32077.9	35206.1	24723.4	41399.9
CL.24944	CL.24944.2	-9.40625	9,36430271163833e-08	4,4144424665335e-06	75.8749	148.4	196.373	7.26867	0	0	0	0
CL.26857	evm.model.group7.600	-2.42006	9,52318241742724e-08	4,48406485859353e-06	668.345	643.78	1447.29	965.695	147.426	279.869	89.848	177.372
CL.26894	evm.model.group7.617	1.13372	9,710945585174e-08	4,56710785913054e-06	765.207	474.027	514.9	549.304	1357.37	1422.55	1185.99	1077.37
CL.23958	evm.model.group6.291	-6.76619	9,79675692338877e-08	4,60206389120971e-06	103.319	52.3138	44.8411	52.9575	0	0	0	1.9708
CL.26576	CL.26576.6	2.4003	9,9221749061071e-08	4,65552164505517e-06	103.319	282.922	92.0016	97.6079	770.281	916.058	682.845	671.385
CL.3255	evm.model.group1.2634	-3.25587	9,94787206368122e-08	4,66211969113107e-06	324.486	113.169	233.483	269.979	24.4257	25.9391	41.4683	7.88319
CL.21597	CL.21597.1	-3.33508	1,0125303498992e-07	4,73973027108188e-06	3407.91	1377.24	1187.52	1122.49	329.747	135.156	189.372	49.2699
CL.18612	CL.18612.1	-0.863554	1,03154025888074e-07	4,82308263399666e-06	408.433	460.148	453.05	493.231	259.087	212.291	284.749	246.35
CL.11741	CL.11741.1	1.16925	1,10867483535202e-07	5,17769238374773e-06	1599.83	2567.65	3054.61	2260.56	5307.35	4578.93	5542.93	5909.76
CL.18478	CL.18478.1	-2.12841	1,11067650460476e-07	5,18100204185248e-06	1746.74	633.104	615.405	1013.46	202.384	227.991	269.544	216.788
CL.28958	evm.model.group7.1894	-3.92875	1,16162917636407e-07	5,41238152289631e-06	3333.65	4172.3	3653.78	3364.36	329.747	19.7956	476.885	128.759
CL.7776	CL.7776.2	-1.01219	1,18060256182e-07	5,49439542997996e-06	1180.1	1113.54	1125.67	1223.21	537.365	562.468	450.622	746.275
CL.18500	CL.18500.1	2.40157	1,18254065857956e-07	5,4970306484087e-06	166.279	56.5843	211.062	95.5311	751.962	609.568	857.011	580.728
CL.4328	CL.4328.2	-8.86273	1,19746463412533e-07	5,55995456424126e-06	129.149	19.2173	26.2862	119.414	0	0	0	0
CL.31298	evm.model.group9.24	8.00551	1,24004019715619e-07	5,75097346065375e-06	0	0	0	0	100.32	31.3999	34.5569	38.759
CL.9930	CL.9930.1	-1.65148	1,27241008869841e-07	5,89427424903415e-06	6170.09	10950.7	14273.4	10395.2	2362.31	3200.74	3043.77	4695.09
CL.23	CL.23.1	2.02318	1,28146741576511e-07	5,92937636832654e-06	272.827	270.11	249.719	182.755	1015.41	845.75	1582.71	522.261
CL.12166	evm.model.group2.1053	1.21574	1,28964940223402e-07	5,96035196626497e-06	818.481	543.423	689.625	650.027	1127.07	1588.43	1622.79	1930.72
CL.17076	evm.model.group3.2314	-1.65022	1,33749427463071e-07	6,17435433000604e-06	1267.27	637.375	824.922	950.119	267.81	343.351	201.812	356.057
CL.31132	evm.model.group8.1529	-7.78173	1,37069827879e-07	6,32035443396032e-06	37.1303	46.9757	34.0174	20.7676	0	0	0	0
CL.23900	CL.23900.1	2.36676	1,39559589552117e-07	6,42776178546358e-06	80.718	294.666	158.49	169.256	562.663	1045.75	872.216	1152.26
CL.8517	CL.8517.1	-3.77144	1,43141248656083e-07	6,58515480327124e-06	663.502	644.848	244.307	170.295	49.7237	19.113	48.3797	9.85398
CL.1861	evm.model.group1.1463	2.30151	1,45203850220045e-07	6,67238334669406e-06	626.372	177.226	445.318	248.173	2173.89	1761.13	2161.88	1275.76
CL.33219	CL.33219.1	2.22397	1,51534213380305e-07	6,95529888905934e-06	448.792	713.176	890.637	345.781	2042.16	3329.07	4174.47	1667.95
CL.4293	CL.4293.5	-8.45043	1,58415011144968e-07	7,26280262766459e-06	12.9149	49.1109	74.2197	84.1089	0	0	0	0
CL.1593	CL.1593.1	-9.4232	1,60367740911109e-07	7,34392614663786e-06	237.311	16.0144	22.4205	157.834	0	0	0	0
CL.31122	evm.model.group8.1521	-2.42263	1,63472386785922e-07	7,47755540926016e-06	263.141	337.371	187.096	329.167	28.7874	57.339	87.0834	36.7882
CL.4835	evm.model.group10.117	-1.8494	1,66352152216733e-07	7,60060517596864e-06	237.311	407.834	386.561	462.08	116.022	93.5171	67.7315	135.985
CL.29921	CL.29921.1	2.30892	1,68920002126687e-07	7,70177861001736e-06	45.2021	23.4878	48.7067	48.8039	166.618	159.047	326.217	174.087
CL.5239	CL.5239.1	-2.27512	1,68950920843655e-07	7,70177861001736e-06	232.468	240.217	137.616	333.321	38.3832	34.8129	73.2606	49.9268
CL.2459	CL.2459.1	8.26055	1,72583416564572e-07	7,85842897925273e-06	0	0	0	0	40.1279	33.4477	138.228	33.5035
CL.291	CL.291.3	7.40622	1,73681088319751e-07	7,89943383538302e-06	0	0	0	0	27.9151	37.5434	29.0278	40.7298
CL.26446	evm.model.group7.292	-2.04493	1,77322608071566e-07	8,05591485876152e-06	1896.87	3691.86	2749.22	1823.4	635.068	294.886	816.925	717.37
CL.31637	evm.model.group9.158	1.65675	1,77645485370763e-07	8,06144348675706e-06	150.136	290.395	247.399	306.323	561.791	966.571	886.039	727.881
CL.28722	CL.28722.1	-2.05042	1,78028247463128e-07	8,06967406770081e-06	158.207	225.27	177.045	123.567	46.2343	30.0347	59.4379	31.5327
CL.11910	CL.11910.1	-2.61522	1,89457968151267e-07	8,5780573828489e-06	463.321	186.835	250.492	323.975	78.5111	54.6085	23.4987	42.0437
CL.20565	evm.model.group4.1901	-0.763043	1,9513194347747e-07	8,82498529925758e-06	14698.8	22216.3	21039.8	18583.9	11280.3	10596.8	11723.1	11506.2
CL.3690	CL.3690.2	-2.57211	2,00632475629647e-07	9,06352119332575e-06	3118.94	2303.94	2136.14	3492.08	570.514	357.003	143.757	785.034
CL.5654	CL.5654.1	1.3523	2,06659523117228e-07	9,32527825597672e-06	558.569	342.709	641.692	492.193	1472.52	1326.99	1419.6	979.486
CL.13762	evm.model.group2.2078	7.45835	2,07343178647935e-07	9,34560311408633e-06	0	0	6.9581	0	201.512	329.016	717.401	78.1749
CL.32117	evm.model.group9.560	1.02255	2,14938677089195e-07	9,67707055164501e-06	2499.03	2414.98	2728.35	2175.41	4243.96	3849.22	6388.88	5468.3
CL.29536	evm.model.group8.400	2.96194	2,24402117992152e-07	1,00917989539231e-05	267.984	321.356	236.575	73.7251	1039.84	2045.09	3047.92	875.691
CL.27731	CL.27731.1	-0.916576	2,27365851412071e-07	1,02136207018853e-05	5064.25	7268.42	4822.74	5898.01	3224.19	3305.18	2529.57	3150.65
CL.17307	CL.17307.2	0.854883	2,308173780029e-07	1,03570574877673e-05	411.662	365.129	330.123	377.971	624.6	578.851	782.368	697.662
CL.23972	CL.23972.1	-3.0696	2,3913099553883e-07	1,07042278222713e-05	514.981	566.911	716.684	439.236	83.7452	30.0347	23.4987	128.102
CL.3685	evm.model.group1.2889	-1.44935	2,39041080577525e-07	1,07042278222713e-05	3230.34	3186.87	2460.08	2372.7	818.26	724.246	1068.5	1507.66
CL.892	evm.model.group1.734	-2.66712	2,39355830515475e-07	1,07042278222713e-05	435.877	788.978	1717.88	856.665	95.958	131.061	123.023	247.663
CL.32954	CL.32954.1	8.44427	2,48307967922963e-07	1,10921965158006e-05	0	0	0	0	137.831	51.1955	74.6429	14.4525
CL.5758	CL.5758.1	8.91847	2,4874914314701e-07	1,10995302515598e-05	0	0	0	0	267.81	34.8129	26.2633	57.1531
CL.25375	CL.25375.1	-3.31228	2,5569414285696e-07	1,13967344875177e-05	707.09	137.724	209.516	228.444	31.4044	17.7478	40.086	40.0729
CL.2236	CL.2236.1	8.95741	2,60372528501201e-07	1,15923635744924e-05	0	0	0	0	219.831	11.6043	117.493	47.956
CL.26849	CL.26849.1	7.73444	2,60670251876592e-07	1,15927380607048e-05	0	0	0	0	26.1704	36.8608	31.7924	74.8903
CL.26611	CL.26611.1	-1.26838	2,65471536765687e-07	1,17931756964535e-05	6.91239e+06	1.36631e+07	1.15062e+07	8.40353e+06	3.75973e+06	3.58172e+06	4.21818e+06	5.24676e+06
CL.187	CL.187.1	-8.90296	2,67514421979842e-07	1,18707673186404e-05	156.593	54.4491	81.951	9.34544	0	0	0	0
CL.12407	CL.12407.6	-8.7927	2,74906165625623e-07	1,21852766113039e-05	177.58	21.3526	53.3454	28.0363	0	0	0	0
CL.34754	CL.34754.3	-0.880388	2,75655763380829e-07	1,22050015896904e-05	1128.44	1249.13	1063.04	1500.46	626.344	673.05	609.584	772.552
CL.21790	CL.21790.1	-11.974	2,76509571689062e-07	1,22292919840847e-05	1428.71	587.196	522.631	0	0	0	0	0
CL.27465	CL.27465.1	1.12371	2,80480876114582e-07	1,23912554640698e-05	632.829	576.52	486.294	453.773	941.261	1030.74	1226.08	1479.41
CL.33152	CL.33152.1	1.43978	2,81113061355475e-07	1,24055070137818e-05	211.481	258.366	219.567	213.907	379.47	761.789	604.055	704.888
CL.28163	CL.28163.15	8.06778	2,84262142795638e-07	1,25306755355569e-05	0	0	0	0	61.9365	70.9911	13.8228	67.0071
CL.3887	evm.model.group1.3013	-0.442714	2,87924820682893e-07	1,26781841371028e-05	23524.5	23648	25509.9	25303.3	17788	19326.6	15915.5	19054.3
CL.20449	evm.model.group4.1815	-1.64821	2,92536905938596e-07	1,28671282337646e-05	879.826	637.375	747.609	611.607	263.448	162.46	163.109	326.495
CL.11651	CL.11651.2	1.18432	2,93241919096746e-07	1,28839952831213e-05	824.938	774.031	907.646	509.845	1779.59	1382.96	1919.98	1774.37
CL.33605	evm.model.utg349_3200640_3770178__.10	1.45554	2,93973304720915e-07	1,29019828260318e-05	679.646	323.492	497.891	685.332	1720.27	1563.17	1350.48	1356.56
CL.3690	CL.3690.12	-2.15184	2,94612684927753e-07	1,29158974672375e-05	6407.4	4640.98	3289.64	3505.58	723.175	1129.03	493.473	1666.64
CL.13817	evm.model.group2.2089	-1.85739	3,02888787952516e-07	1,32642117303359e-05	293.814	367.264	470.058	536.843	70.66	107.169	124.405	158.321
CL.21267	CL.21267.3	7.77517	3,23915820640968e-07	1,41540969826429e-05	0	0	0	0	47.979	53.9259	56.6733	16.4233
CL.2955	CL.2955.1	-11.7923	3,23789270786201e-07	1,41540969826429e-05	726.462	793.249	718.231	0	0	0	0	0
CL.12593	CL.12593.1	6.31402	3,24998253457004e-07	1,41765506675799e-05	0	0	3.86561	0	119.511	53.2433	91.2302	94.5982
CL.18938	CL.18938.1	-3.31289	3,25137261380233e-07	1,41765506675799e-05	1225.3	2123.51	3214.64	1781.86	99.4474	53.9259	252.957	433.575
CL.33272	CL.33272.3	-1.50516	3,25779245382907e-07	1,41891025679273e-05	3972.94	5827.12	6403.77	4473.35	1310.26	1296.95	2460.45	2219.77
CL.4778	evm.model.group10.65	1.22765	3,30479127011524e-07	1,43781743966903e-05	192.109	155.874	145.347	123.567	376.853	329.016	434.035	301.532
CL.30343	CL.30343.1	1.79616	3,33524891194717e-07	1,44949483624429e-05	327.715	227.405	160.809	259.595	913.346	1131.08	507.295	825.764
CL.34192	evm.model.utg55_1614235_1729606__.3	1.81338	3,39261638262596e-07	1,47282923566438e-05	540.811	380.076	654.062	423.66	1920.03	1479.89	2626.33	1002.48
CL.33560	CL.33560.1	-2.10304	3,41511157902519e-07	1,48099048670497e-05	453.635	725.988	606.128	264.787	116.894	99.6606	170.02	92.6274
CL.31904	evm.model.group9.374	2.08025	3,43627180911187e-07	1,48855579882284e-05	2319.84	1315.32	4525.86	2026.92	8450.41	7551.68	14448.9	12640
CL.5146	CL.5146.5	-8.48443	3,5138948055721e-07	1,52053741748676e-05	114.62	29.8936	15.4624	66.4564	0	0	0	0
CL.3219	CL.3219.1	5.00259	3,61497093047204e-07	1,56258775818786e-05	32.2872	23.4878	37.883	0	720.558	1070.33	971.74	238.466
CL.24825	CL.24825.2	0.807202	3,64097261743587e-07	1,57213117220534e-05	561.797	483.636	398.931	482.848	865.367	746.089	850.1	901.311
CL.2026	CL.2026.5	0.976262	3,65916229146209e-07	1,57828453195787e-05	627.986	435.593	709.726	584.609	1210.82	1190.47	1208.11	1032.04
CL.4944	CL.4944.1	9.0837	3,68404865979243e-07	1,58730999782669e-05	0	0	0	0	322.768	38.9086	46.9974	24.3065
CL.33511	CL.33511.1	8.79853	3,72825951223455e-07	1,60463328308527e-05	0	0	0	0	46.2343	17.7478	55.2911	235.839
CL.3690	CL.3690.20	-1.34418	3,87258954886015e-07	1,66496419766981e-05	21969.8	17421.6	13187.1	13335.9	6999.7	6143.46	4332.05	8482.31
CL.20682	CL.20682.1	8.70653	3,89359980014242e-07	1,67220304385538e-05	0	0	0	0	194.533	54.6085	12.4405	71.6056
CL.31716	evm.model.group9.195	2.32674	4,05728783669633e-07	1,74063729782036e-05	127.534	172.956	169.314	106.953	710.962	309.904	1221.93	655.618
CL.34192	CL.34192.1	2.16184	4,15367293543978e-07	1,78008208046066e-05	61.3457	186.835	231.164	155.757	769.409	626.633	866.687	591.896
CL.7164	CL.7164.2	-2.29331	4,26951986661964e-07	1,82777415657531e-05	439.106	858.374	661.793	575.264	152.661	206.83	93.9948	63.0655
CL.6585	evm.model.group11.243	-3.33615	4,51892788059404e-07	1,93248068490292e-05	326.101	348.047	285.282	283.478	19.1916	11.6043	77.4075	17.0802
CL.7800	CL.7800.1	8.76554	4,54566086637263e-07	1,94184041487795e-05	0	0	0	0	187.554	10.9217	45.6151	103.138
CL.2570	evm.model.group1.2168	-2.00886	4,55866038902239e-07	1,94531972085332e-05	1214	2410.71	2890.7	2406.97	382.96	382.26	557.057	894.742
CL.14807	evm.model.group3.498	-8.80859	4,68432283319248e-07	1,99681719070237e-05	119.463	56.5843	99.7328	7.26867	0	0	0	0
CL.13005	evm.model.group2.1560	-1.28631	4,71187321558728e-07	2,00642677734944e-05	6710.9	4222.47	3659.96	3382.01	1909.56	2071.03	1832.9	1554.3
CL.15534	evm.model.group3.1017	1.2738	4,94759866169922e-07	2,1045677109797e-05	708.704	592.534	574.43	350.973	1123.58	1394.57	1448.63	1411.75
CL.2166	CL.2166.1	9.0088	5,0633625172462e-07	2,1515263633728e-05	0	0	0	0	33.1491	22.526	304.101	51.8976
CL.7188	CL.7188.1	2.09859	5,08164075184737e-07	2,15700577252674e-05	356.774	146.265	219.567	157.834	575.748	862.815	945.477	1377.59
CL.13279	CL.13279.5	1.23037	5,13531533694339e-07	2,17748238678647e-05	154.979	118.507	148.439	142.258	281.768	435.503	302.719	300.875
CL.31340	evm.model.group9.49	-0.842117	5,30138357158633e-07	2,24552261853556e-05	2634.64	3663.04	3158.98	3181.6	1482.12	2016.42	1597.91	1951.75
CL.30751	CL.30751.1	-1.38101	5,63923146669097e-07	2,38610353611729e-05	1523.96	2590.07	1470.48	1408.05	678.685	800.015	514.207	689.779
CL.4716	CL.4716.1	-4.76696	5,67789843190338e-07	2,39993027601655e-05	88.7898	246.622	124.473	184.832	0	4.09564	15.205	5.25546
CL.14823	CL.14823.1	-0.861033	5,69703889170065e-07	2,40548312318699e-05	3853.48	4352.72	3305.87	4664.41	2623.14	2309.94	2131.47	1841.38
CL.27812	CL.27812.2	-1.65065	5,79102916377131e-07	2,44259514307701e-05	576.327	996.098	813.325	638.605	198.022	290.791	157.58	314.67
CL.28373	evm.model.group7.1649	-1.26326	5,96858059701527e-07	2,51483727152894e-05	2080.91	2082.94	1733.34	2239.79	1132.3	903.771	539.088	811.311
CL.1956	evm.model.group1.1765	11.6931	5,98962157438055e-07	2,52105185383854e-05	0	0	0	0	737.132	845.067	1060.21	0
CL.4865	CL.4865.4	-1.70304	6,09224068898216e-07	2,56155387625934e-05	1720.91	2824.95	2806.43	1616.76	572.259	525.607	581.938	1074.08
CL.20155	CL.20155.1	-2.58795	6,15227066405568e-07	2,58408265732402e-05	1202.7	376.873	729.054	549.304	70.66	80.5476	205.959	119.562
CL.34441	CL.34441.1	-2.72922	6,27695890576167e-07	2,6336936476845e-05	159.822	239.149	83.4972	122.529	36.6385	19.7956	12.4405	21.6788
CL.20939	CL.20939.1	0.466293	6,3239359875196e-07	2,6506288181999e-05	1151.04	1268.34	1088.56	1167.14	1607.73	1492.86	1667.03	1691.6
CL.21890	CL.21890.1	1.17077	6,69454288872052e-07	2,80303378841203e-05	258.298	192.173	207.97	256.48	492.003	658.033	493.473	411.896
CL.10993	CL.10993.2	0.711437	6,87402809581375e-07	2,87518064508619e-05	828.167	734.529	879.813	827.59	1333.82	1587.74	1221.93	1209.41
CL.32704	evm.model.group9.914	-1.10067	7,22373861848219e-07	3,0183024655118e-05	1283.42	1070.83	1179.78	945.966	392.556	494.207	678.698	526.203
CL.22544	evm.model.group5.1141	8.02208	7,32378644660549e-07	3,05691794703627e-05	0	0	0	0	29.6598	23.2086	40.086	114.306
CL.29298	CL.29298.1	-1.07404	7,62447081044854e-07	3,17911077393e-05	51678.9	80007.1	76569.3	69506.2	24281.7	30645	34764.3	42243.4
CL.26093	CL.26093.1	-1.62525	7,79086618798165e-07	3,24511442985889e-05	1611.13	4129.59	3199.95	4394.43	1237.86	1160.43	953.771	970.946
CL.33361	evm.model.utg2157_1174894_1545155__.11	1.73899	7,80099166657684e-07	3,24595779937419e-05	1829.07	1006.77	2949.46	2138.03	5348.35	5018.53	8283.98	7803.7
CL.21355	CL.21355.3	9.00278	7,84567518482241e-07	3,26116394871197e-05	0	0	0	0	126.49	4.77825	82.9366	195.109
CL.34028	CL.34028.1	2.15322	7,93255658640412e-07	3,29386054318355e-05	138.835	64.0578	75.766	68.5332	241.64	286.695	499.002	509.122
CL.30145	CL.30145.1	1.74128	7,98299633918567e-07	3,31137332620259e-05	198.566	287.192	405.889	192.101	960.453	1175.45	876.363	618.83
CL.8052	CL.8052.6	-1.76241	8,0587275806736e-07	3,33933003265348e-05	226.01	254.096	180.911	183.794	43.6173	69.6259	45.6151	88.0289
CL.20163	CL.20163.1	-1.34984	8,15307179209213e-07	3,37493374699516e-05	1130.05	825.277	1234.68	879.509	355.045	389.086	295.807	553.794
CL.7044	CL.7044.1	-1.64964	8,23604551463879e-07	3,40576206162617e-05	3953.57	9431.44	6737.76	7626.91	2160.8	2800.05	1335.28	2546.27
CL.11321	CL.11321.1	-9.46185	8,56222516885724e-07	3,53699342800113e-05	311.572	18.1497	10.8237	104.877	0	0	0	0
CL.18086	evm.model.group4.194	1.34413	8,69729401267497e-07	3,58908930059615e-05	395.518	424.916	701.222	522.306	1037.22	1201.39	1708.49	1252.77
CL.14414	evm.model.group2.2581	1.83992	8,71760818744762e-07	3,59377119414636e-05	1985.66	1479.73	1741.07	640.682	5105.84	3510.65	6014.28	6298.01
CL.25908	evm.model.group6.1489	2.64509	8,97289907526481e-07	3,69521136635006e-05	445.563	1450.91	1134.94	697.793	1873.8	4780.98	8874.21	7806.98
CL.31421	CL.31421.8	-0.934258	9,10840325346108e-07	3,74716343291772e-05	1391.58	1344.15	1201.43	1593.92	792.09	544.038	735.371	823.136
CL.9076	CL.9076.5	-5.01804	9,65188379191943e-07	3,96667675427909e-05	598.928	122.777	173.179	112.145	0	10.9217	12.4405	7.88319
CL.28373	CL.28373.1	-1.44562	1,00027714628588e-06	4,1066706200487e-05	768.436	1292.9	1373.07	1123.53	435.301	421.168	277.838	537.37
CL.15606	evm.model.group3.1122	-4.73328	1,02187901975125e-06	4,19106369717837e-05	523.053	463.351	788.585	449.619	0	15.7	45.6151	22.9926
CL.19594	evm.model.group4.1244	0.460926	1,03178155569447e-06	4,22735040252326e-05	1142.97	975.813	1083.92	1046.69	1544.92	1379.55	1409.92	1507.66
CL.27823	CL.27823.3	0.939488	1,05286913534535e-06	4,3093428246464e-05	532.739	494.312	473.924	337.474	800.813	863.498	975.887	882.917
CL.31111	evm.model.group8.1512	-8.22829	1,06472939629871e-06	4,35343948058054e-05	69.4175	26.6907	12.37	80.9938	0	0	0	0
CL.4551	CL.4551.2	1.63814	1,06981383602682e-06	4,3697696645866e-05	62.9601	60.8549	74.9929	53.9959	204.129	123.552	217.017	244.379
CL.30132	evm.model.group8.814	-8.74926	1,08006836594199e-06	4,40716287406268e-05	161.436	71.5312	28.6055	10.3838	0	0	0	0
CL.2122	evm.model.group1.1862	1.31399	1,0978890405372e-06	4,47532185700159e-05	67.8031	98.2219	126.019	93.4544	220.703	246.421	225.311	273.284
CL.20449	CL.20449.1	-1.85711	1,17033210111592e-06	4,76093475042789e-05	363.231	318.154	218.021	210.792	58.4472	54.6085	111.964	82.7734
CL.31874	CL.31874.3	-2.05275	1,17029665438566e-06	4,76093475042789e-05	889.513	2182.23	995.009	1086.15	232.916	219.117	487.944	304.16
evm.TU.group10.879	evm.model.group10.879	-8.01943	1,17919582675668e-06	4,79212746228603e-05	77.4893	12.8116	33.2443	40.4969	0	0	0	0
CL.26230	CL.26230.1	-2.42083	1,18923424311654e-06	4,82802594951161e-05	124.306	170.821	237.349	105.915	13.9575	36.8608	37.3215	31.5327
CL.22107	CL.22107.1	-0.878368	1,19075604726791e-06	4,82931121599447e-05	4904.43	5955.24	4206.56	3626.03	2665.89	2279.22	2558.59	2663.86
CL.24835	CL.24835.1	-4.09591	1,19958223008921e-06	4,86018806467895e-05	7177.45	7211.84	12394.7	3918.85	34.8938	118.091	839.042	804.085
CL.29383	CL.29383.1	-2.0338	1,20327354578086e-06	4,87021929085242e-05	984.76	589.331	483.975	286.593	144.809	119.456	161.726	146.496
CL.14105	evm.model.group2.2393	2.11026	1,22108453378419e-06	4,93732162146645e-05	6718.97	1514.97	5694.82	4590.69	15059.3	16229.7	27340	21329.3
CL.31597	CL.31597.1	-1.41905	1,24878837542821e-06	5,04424901244035e-05	2888.09	3165.52	2890.7	1347.82	978.772	910.598	1092	868.464
CL.22723	CL.22723.1	-2.82671	1,27592604385812e-06	5,14867639248691e-05	5921.47	15083.5	24154.7	11174	792.09	921.519	2741.05	3486.34
CL.22226	CL.22226.3	-11.3575	1,28444502172769e-06	5,17783823145158e-05	648.973	617.09	389.654	0	0	0	0	0
CL.27661	CL.27661.2	1.34852	1,291801704407e-06	5,20226073322498e-05	445.563	464.419	620.044	369.664	1023.26	896.263	1622.79	1302.04
CL.13356	CL.13356.1	-1.35068	1,29669343479169e-06	5,21671746306254e-05	925.029	1409.27	1264.06	1186.87	372.492	354.956	482.414	666.786
CL.17623	CL.17623.1	8.50961	1,30742265375918e-06	5,2546063927914e-05	0	0	0	0	105.554	8.19128	134.081	43.3575
CL.28438	CL.28438.4	1.7709	1,31157801937558e-06	5,26602517398593e-05	103.319	197.511	216.474	120.452	401.279	455.981	623.407	703.574
CL.6984	evm.model.group11.476	-7.68386	1,34632894675214e-06	5,4001402298657e-05	14.5292	46.9757	40.9755	26.9979	0	0	0	0
CL.5898	CL.5898.2	-2.08624	1,38801667371919e-06	5,56178281159281e-05	481.079	314.951	303.837	201.446	45.362	112.63	74.6429	72.9195
CL.30283	evm.model.group8.870	-2.10112	1,39253697334191e-06	5,57432133085017e-05	80.718	113.169	126.019	151.604	19.1916	41.639	22.1164	26.2773
CL.5358	CL.5358.4	2.17899	1,40828211807464e-06	5,63172300112283e-05	211.481	377.941	398.931	96.5695	1197.73	1094.9	1291.05	1334.89
CL.26446	CL.26446.1	-2.01564	1,43805841129933e-06	5,74506485949793e-05	679.646	580.79	928.52	424.698	190.171	100.343	244.663	113.649
CL.28934	evm.model.group7.1890	-0.590181	1,46107386062743e-06	5,83119816686664e-05	23492.2	20236.9	22334.7	22196.5	12738.9	14053.5	14273.4	17557.2
CL.9087	evm.model.group12.1178	-1.37599	1,47120175978397e-06	5,86577656861129e-05	758.749	455.878	414.394	460.003	243.384	194.543	194.901	170.802
CL.23615	evm.model.group6.106	-3.18197	1,49712090734592e-06	5,96318436951799e-05	11145.5	13898.4	34945.9	14643.3	787.728	502.399	3555.21	3379.26
CL.23895	CL.23895.1	-8.98331	1,51335285766463e-06	6,02185193710244e-05	222.782	46.9757	41.7486	8.30705	0	0	0	0
CL.1042	CL.1042.1	8.56917	1,53616943239891e-06	6,10657828930795e-05	0	0	0	0	8.72346	104.439	35.9392	153.722
CL.3156	CL.3156.1	-1.6916	1,57460949319936e-06	6,25318160480659e-05	74.2606	83.2751	78.0854	71.6483	18.3193	19.113	30.4101	28.2481
CL.18354	CL.18354.1	9.15882	1,61695682291919e-06	6,41499602914574e-05	0	0	0	0	365.513	29.3521	15.205	45.9852
CL.33140	CL.33140.1	-11.5394	1,63266149641699e-06	6,47089477363292e-05	1301.17	0	312.341	264.787	0	0	0	0
CL.23891	CL.23891.1	-0.98176	1,66966561023875e-06	6,61101788559949e-05	347.087	509.259	398.158	466.233	207.618	252.565	199.048	211.532
CL.8883	CL.8883.1	0.886343	1,68869840872334e-06	6,67977741732916e-05	1770.95	1339.87	1472.03	1164.03	2622.27	2195.26	3075.56	2726.27
CL.20816	evm.model.group5.134	1.4492	1,69477370794723e-06	6,69719748298279e-05	153.364	151.603	184.776	129.798	301.832	516.733	333.129	539.341
CL.30940	CL.30940.3	-0.726422	1,76637298506317e-06	6,97325768586022e-05	3306.21	3131.36	3111.82	3940.66	2342.25	2121.54	2015.36	1675.18
CL.12022	CL.12022.2	1.77457	1,82760693250265e-06	7,20789466391549e-05	71.0319	36.2994	71.9004	40.4969	218.086	155.634	165.873	210.218
CL.27286	CL.27286.1	1.57188	1,84747592961588e-06	7,27909149456324e-05	111.391	160.144	166.221	224.29	507.705	666.907	436.799	361.313
CL.19662	evm.model.group4.1310	0.94015	1,85344529345179e-06	7,29543741734905e-05	213.096	261.569	253.584	224.29	526.024	513.32	409.154	381.678
CL.15740	evm.model.group3.1226	2.07936	1,86771196781674e-06	7,34437866049234e-05	61.3457	70.4635	21.6474	55.0342	188.427	204.782	236.369	245.693
CL.28466	CL.28466.5	8.91086	1,88287460477373e-06	7,39674366796896e-05	0	0	0	0	111.66	199.321	69.1138	3.94159
CL.9417	CL.9417.1	9.05236	1,89375442448488e-06	7,43219782459445e-05	0	0	0	0	287.002	5.46085	77.4075	53.8684
CL.24477	CL.24477.1	2.51848	1,95927811482705e-06	7,68182720754597e-05	130.763	54.4491	66.4885	175.487	682.174	793.189	689.756	278.539
CL.31794	evm.model.group9.282	-5.04474	1,96137466463545e-06	7,68253008914392e-05	62.9601	235.946	1434.14	181.717	21.8086	4.77825	4.14683	26.9342
CL.11472	CL.11472.1	-0.893442	1,99406499586615e-06	7,80294769378481e-05	1110.68	729.191	1056.09	979.194	536.493	466.903	504.531	576.786
CL.26304	evm.model.group7.152	8.05814	2,00673374181822e-06	7,84486058874695e-05	0	0	0	0	35.7662	11.6043	109.2	56.4962
CL.20464	CL.20464.6	8.72709	2,04676391136677e-06	7,99355067528915e-05	0	0	0	0	123.873	4.09564	136.845	73.5764
CL.31337	evm.model.group9.48	2.32721	2,12793013980948e-06	8,3024499223141e-05	489.151	398.226	497.891	268.941	598.429	2472.4	2912.46	2317.66
CL.1425	CL.1425.1	3.50101	2,16152079525099e-06	8,4253052787653e-05	25.8298	11.7439	11.5968	13.499	150.916	350.177	157.58	42.0437
CL.5587	CL.5587.2	11.2228	2,17092424217914e-06	8,45373511993375e-05	0	0	0	0	0	431.408	1033.94	442.115
CL.33204	evm.model.utg1661_840873_1372191__.11	-1.10121	2,19730778179543e-06	8,54816726374204e-05	1419.02	2098.96	1920.44	1476.58	676.068	671.003	843.189	1034.01
CL.28863	evm.model.group7.1851	8.3229	2,28854562464664e-06	8,89447363526584e-05	0	0	0	0	25.298	46.4173	167.255	17.0802
CL.20935	CL.20935.1	-3.98604	2,34499640101676e-06	9,10503932061449e-05	1125.21	1114.6	1412.49	613.684	161.384	5.46085	74.6429	28.2481
CL.31447	CL.31447.2	-0.644965	2,35768197472378e-06	9,1454324034058e-05	5664.79	7587.64	7735.86	6991.43	4431.52	4957.77	4008.6	4496.04
CL.5563	CL.5563.2	1.31002	2,4091055358571e-06	9,3358664237712e-05	337.401	292.53	348.678	533.728	1152.37	978.176	913.685	707.516
CL.1567	evm.model.group1.1250	-11.5177	2,43399066585811e-06	9,42318898366518e-05	1359.29	0	160.809	330.205	0	0	0	0
CL.16251	CL.16251.1	8.70997	2,46186854989626e-06	9,52191822339221e-05	0	0	0	0	109.916	4.77825	167.255	52.5546
CL.11984	CL.11984.3	-5.6935	2,47061843206744e-06	9,54654586045733e-05	298.657	64.0578	173.179	118.376	4.36173	0	0	7.88319
CL.34598	CL.34598.1	1.71506	2,47493423970411e-06	9,55400915076527e-05	43.5877	70.4635	45.6142	52.9575	212.852	199.321	109.2	176.058
CL.29065	CL.29065.1	-0.793991	2,48061792070242e-06	9,56673340544235e-05	1039.65	869.05	1191.38	868.087	512.939	599.329	624.789	553.794
CL.32968	evm.model.group9.1288	-0.732093	2,55840908217123e-06	9,85725499255782e-05	3030.15	4373.01	3423.39	3567.88	1986.33	1978.88	2441.1	2264.45
CL.5085	evm.model.group10.405	-2.61001	2,62152946287947e-06	0.000100907	445.563	1252.33	1114.07	774.633	69.7877	113.313	110.582	292.992
CL.22524	evm.model.group5.1138	0.796444	2,67922389889696e-06	0.000103029	1249.51	1677.25	1479.76	1840.01	2818.55	3056.03	2313.93	2663.2
CL.7164	CL.7164.1	-2.41422	2,68681683786722e-06	0.000103222	747.449	405.699	276.778	480.771	114.277	83.278	125.787	36.1313
CL.14535	CL.14535.1	11.2505	2,69006955438341e-06	0.000103248	0	0	0	0	1093.05	0	422.977	428.32
CL.17490	CL.17490.1	1.30115	2,78813726216012e-06	0.00010691	79.1037	93.9514	113.649	104.877	209.363	188.399	291.66	281.824
CL.4386	CL.4386.1	-9.87802	2,80085841075981e-06	0.000107295	6859.42	6840.3	12848.5	1645.84	0	0	30.4101	0
CL.14794	CL.14794.1	-5.12073	2,80370271845164e-06	0.000107301	72.6462	127.048	81.951	43.612	0	5.46085	0	3.28466
CL.7764	CL.7764.2	2.01463	2,87082382555318e-06	0.000109765	37.1303	39.5023	98.1865	43.612	232.044	204.099	248.81	206.934
CL.3043	CL.3043.1	-3.25804	2,93877629354097e-06	0.000112256	437.492	219.932	166.221	115.26	18.3193	18.4304	9.67593	50.5838
CL.9137	CL.9137.1	-1.88971	3,01377189516314e-06	0.000115011	589.242	1326	1060.72	651.065	376.853	214.339	165.873	221.386
CL.14955	CL.14955.1	-5.08316	3,05633871799209e-06	0.000116525	227.625	175.091	640.918	90.3392	9.5958	0	17.9696	6.56932
CL.1462	CL.1462.1	-11.165	3,06187729697401e-06	0.000116625	339.016	560.505	0	549.304	0	0	0	0
CL.23701	CL.23701.1	1.4362	3,07302261802213e-06	0.000116938	58.117	37.367	60.3035	38.4201	142.192	122.869	140.992	119.562
CL.16494	evm.model.group3.1848	-1.7498	3,14181232247139e-06	0.000119443	11560.4	11073.5	13986.6	12462.7	1931.37	2269.67	6224.39	4172.18
CL.31034	evm.model.group8.1476	-5.43498	3,15237251762466e-06	0.00011973	5577.62	6181.57	12281	4389.24	0	54.6085	272.308	330.437
CL.27874	CL.27874.3	-1.56197	3,16346346164571e-06	0.000120038	393.904	492.177	391.2	449.619	78.5111	145.395	167.255	193.795
CL.33060	CL.33060.1	1.43572	3,17432883149399e-06	0.000120336	8594.85	9449.59	11898.4	9064.04	30911.6	28569.8	12531.7	33506.8
CL.15644	CL.15644.1	-0.476276	3,22454184061183e-06	0.000122124	6433.23	6211.47	6517.42	7631.07	4559.75	4994.63	4518.66	5182.54
CL.10873	CL.10873.4	1.96812	3,38312428935869e-06	0.000128009	113.005	250.893	317.753	124.606	565.28	765.885	909.538	922.99
CL.15981	evm.model.group3.1414	-1.87022	3,43655348785693e-06	0.000129908	1451.31	2721.39	3550.95	3110.99	599.302	451.203	707.726	1205.47
CL.31361	CL.31361.1	11.4255	3,48089317814715e-06	0.00013146	0	0	0	0	536.493	0	1501.15	157.664
CL.25875	CL.25875.5	-2.94796	3,69267078187968e-06	0.000139196	127.534	95.019	95.8672	57.111	10.4681	15.7	2.76455	18.3941
CL.30125	CL.30125.1	11.0506	3,69266252406354e-06	0.000139196	0	0	0	0	649.898	448.473	594.379	0
CL.17219	evm.model.group3.2402	-1.90046	3,70029106182333e-06	0.000139352	297.042	617.09	382.696	286.593	137.831	74.4041	134.081	79.4888
CL.17788	evm.model.group3.2790	0.772189	3,75241928131199e-06	0.000141183	2090.6	1650.55	1788.23	1309.4	3076.76	2770.02	3028.57	2798.53
CL.649	CL.649.1	1.85379	3,76253374613464e-06	0.00014143	62.9601	46.9757	52.5723	30.1131	150.043	132.426	254.339	158.321
CL.24806	CL.24806.1	-1.41345	3,82996942683418e-06	0.00014383	1641.8	2188.64	1504.5	1106.92	779.005	447.107	713.255	480.874
CL.17758	evm.model.group3.2778	1.69588	3,84284078339606e-06	0.000144178	382.603	270.11	292.24	300.092	1060.77	773.394	1618.65	580.728
CL.5897	CL.5897.1	-1.20931	3,84769451136144e-06	0.000144226	1054.18	1770.13	1049.13	1536.81	739.749	488.747	550.146	561.677
CL.23892	CL.23892.1	-5.12163	3,87684049132453e-06	0.000145182	792.651	297.869	753.794	160.949	13.9575	0	35.9392	8.54012
CL.10574	CL.10574.1	0.808244	3,98185044595817e-06	0.000148909	468.165	392.888	492.479	401.854	683.919	679.194	908.156	806.056
CL.4779	CL.4779.1	1.71595	3,98378217022433e-06	0.000148909	96.8616	165.483	219.567	172.371	459.726	724.928	615.113	358.028
CL.34297	evm.model.utg596_8117332_8245845__.2	-1.50129	4,00951894504589e-06	0.000149731	657.045	560.505	501.756	558.649	172.724	293.521	118.876	216.131
CL.28943	CL.28943.1	7.96037	4,01458130588394e-06	0.000149781	0	0	0	0	116.894	13.6521	38.7037	29.5619
CL.18957	CL.18957.3	2.28126	4,0365406125779e-06	0.00015046	33.9016	108.898	187.096	118.376	619.365	524.925	544.617	501.896
CL.2280	evm.model.group1.1929	1.4015	4,28498753266001e-06	0.000159572	2168.09	1972.98	2697.42	998.923	5920.61	4470.39	5352.17	4963.12
CL.20444	CL.20444.1	8.61728	4,32817425610766e-06	0.000161031	0	0	0	0	90.724	3.41303	147.904	71.6056
CL.5171	CL.5171.1	0.992592	4,40262413508663e-06	0.000163649	967.002	1647.35	1492.9	1084.07	2834.25	2269.67	2725.85	2508.82
CL.26093	evm.model.group6.1707	-1.33501	4,41116110398528e-06	0.000163814	4068.19	10289.8	6285.49	8374.55	3316.66	2787.08	2613.88	2785.39
CL.13278	CL.13278.1	-1.96116	4,4547241003948e-06	0.000165279	277.67	245.555	376.511	386.278	89.8516	130.378	42.8506	65.6932
CL.12778	evm.model.group2.1465	1.33004	4,4590582556825e-06	0.000165286	962.159	407.834	566.699	566.957	1495.2	1671.7	1422.36	1694.23
CL.26666	CL.26666.2	-2.7637	4,4791846413055e-06	0.000165879	38.7446	134.521	76.5391	53.9959	7.85111	10.9217	13.8228	12.4817
CL.21622	CL.21622.1	-2.22919	4,67737935949763e-06	0.000173059	384.218	259.434	451.503	321.898	31.4044	55.9738	113.347	102.481
CL.19194	CL.19194.2	-3.70349	4,94265558693974e-06	0.000182705	708.704	2414.98	2685.83	1465.16	50.5961	24.5738	120.258	362.627
CL.34396	CL.34396.1	-11.1611	4,94988308092925e-06	0.000182804	894.356	427.052	123.7	0	0	0	0	0
CL.11931	CL.11931.12	-1.06023	5,05203861639903e-06	0.000186404	1423.87	1409.27	1346.78	1002.04	839.197	511.955	563.969	569.56
CL.24073	evm.model.group6.352	0.648105	5,16619541005304e-06	0.000190441	878.212	797.519	999.647	876.394	1552.78	1200.02	1490.09	1330.29
CL.22273	CL.22273.1	2.3483	5,18527697037985e-06	0.000190969	297.042	77.9369	384.242	238.828	960.453	1093.54	1998.77	1032.04
CL.26745	CL.26745.1	-3.67695	5,23719843956177e-06	0.000192704	188.88	259.434	122.153	29.0747	8.72346	4.77825	16.5873	17.0802
CL.5947	CL.5947.1	-2.21331	5,24302431075261e-06	0.000192741	251.84	423.849	295.333	312.553	34.0215	45.7347	77.4075	119.562
CL.24744	evm.model.group6.694	-3.66223	5,26618807551659e-06	0.000193415	2258.49	550.897	898.368	142.258	83.7452	82.5954	111.964	26.2773
CL.17524	CL.17524.1	-1.61498	5,48115152961349e-06	0.000201125	311.572	551.964	801.728	554.496	145.682	170.652	178.314	230.583
CL.5396	CL.5396.1	10.8905	5,48613855250787e-06	0.000201125	0	0	0	0	616.748	0	454.769	443.429
CL.7131	CL.7131.1	-1.79555	5,52499444147144e-06	0.000202364	584.398	1609.98	1641.34	1262.67	246.002	479.873	375.979	367.225
CL.4616	CL.4616.2	-0.700047	5,5830806499725e-06	0.000204305	3638.77	4989.03	3727.22	4401.7	2275.95	2679.91	2438.34	2918.75
CL.23403	evm.model.group5.1849	0.989276	5,67388373346447e-06	0.000207438	2899.39	2784.38	3539.35	2266.79	5113.69	4471.07	7439.41	5792.17
CL.24689	CL.24689.1	0.76826	5,8192515185436e-06	0.000212559	347.087	462.283	453.823	346.82	685.664	666.224	646.905	748.246
CL.28966	CL.28966.1	-11.5792	5,84141507934351e-06	0.00021298	1670.86	0	186.322	73.7251	0	0	0	0
CL.531	CL.531.1	-1.06689	5,83805430158029e-06	0.00021298	684.489	835.954	721.323	846.281	361.151	264.851	486.561	365.911
CL.24806	evm.model.group6.718	-1.28253	5,861201406755e-06	0.000213508	1804.85	1944.15	1468.93	996.847	560.046	761.789	738.136	495.327
CL.26697	CL.26697.1	-1.31439	5,94438567562949e-06	0.000216341	1238.21	2767.3	2692.01	2657.22	857.516	1036.2	847.335	1020.87
CL.21206	evm.model.group5.335	-1.35573	5,96843312782326e-06	0.000217019	1509.43	2291.13	2310.09	2312.48	572.259	610.933	1004.91	1104.96
CL.8632	CL.8632.1	10.9156	6,05999906138442e-06	0.000220149	0	0	0	0	711.834	304.443	525.265	0
CL.13827	CL.13827.1	-1.99671	6,22792364899986e-06	0.000226044	267.984	343.777	831.88	398.739	128.235	89.4215	107.818	136.642
CL.29497	CL.29497.1	7.48881	6,2938134879224e-06	0.000228229	0	0	0	0	30.5321	10.9217	59.4379	42.7006
CL.20428	CL.20428.1	8.33278	6,31571417678344e-06	0.000228816	0	0	0	0	109.043	87.3737	4.14683	56.4962
CL.879	evm.model.group1.727	1.06046	6,4834792269395e-06	0.000234682	103.319	101.425	84.2703	103.838	163.129	229.356	230.84	194.452
CL.13770	evm.model.group2.2085	-1.14787	6,51233066310128e-06	0.000235514	513.367	527.409	620.044	616.799	164.873	301.712	277.838	283.795
CL.9306	CL.9306.1	1.32912	6,57149762393884e-06	0.000237439	623.143	286.125	569.791	576.302	1427.16	1487.4	1136.23	1110.22
CL.34525	CL.34525.1	0.843974	6,79932121535733e-06	0.000245449	742.606	818.872	1203.75	923.121	1573.71	1645.08	1792.81	1620.65
CL.11570	evm.model.group2.594	-0.642679	6,83850049199196e-06	0.000246642	1293.1	1383.65	1274.11	1070.57	751.962	862.815	886.039	718.027
CL.9259	evm.model.group13.88	0.669678	6,90288755615947e-06	0.00024874	1683.78	2392.56	2051.87	1976.04	3046.23	3560.48	2870.99	3416.7
CL.34354	evm.model.utg622_3728749_3832454__.1	-0.695085	6,91823784917764e-06	0.000249069	2294.01	2260.17	2617.02	2475.5	1647.86	1562.49	1141.76	1601.6
CL.32214	evm.model.group9.604	-2.79641	6,96534808441041e-06	0.00025054	745.834	310.68	195.6	183.794	74.1494	45.0521	62.2024	25.6204
CL.17852	CL.17852.1	0.915175	7,05907678240934e-06	0.000253684	187.266	203.917	195.6	159.911	334.108	363.829	421.594	292.335
CL.26205	CL.26205.1	2.26533	7,07366169806214e-06	0.00025398	82.3324	28.826	67.2616	50.8807	467.577	215.704	187.99	227.299
CL.33421	evm.model.utg233_2382423_2676918__.16	0.818366	7,12984177550843e-06	0.000255768	1042.88	807.128	949.394	971.925	1292.82	1708.56	1636.62	2007.58
CL.15534	CL.15534.1	1.10265	7,19418768905529e-06	0.000257845	256.683	389.685	323.165	236.751	573.131	550.864	733.989	737.078
CL.4967	CL.4967.1	-2.28192	7,24462644919037e-06	0.000259421	161.436	574.385	363.368	558.649	68.043	80.5476	62.2024	129.416
CL.18505	evm.model.group4.520	-0.566467	7,28695098792552e-06	0.000260471	1682.16	1412.47	1566.35	1347.82	1011.92	1118.11	910.92	1009.7
CL.29425	evm.model.group8.321	0.544602	7,28495939137633e-06	0.000260471	535.968	555.167	451.503	544.112	728.409	736.533	807.249	768.611
CL.7152	CL.7152.1	-1.11625	7,34241548630126e-06	0.00026222	433777	753270	524456	501801	354520	245348	226132	194975
CL.29736	CL.29736.1	8.91372	7,4367076663108e-06	0.000265351	0	0	0	0	12.2128	13.6521	308.248	51.2407
CL.4381	evm.model.group1.3289	-9.83421	7,59152601704521e-06	0.000270634	9414.95	11765.3	22550.4	2549.23	0	50.5129	0	0
CL.7064	CL.7064.1	10.9383	7,77090629322757e-06	0.000276782	0	0	0	0	753.707	0	645.523	166.861
CL.21712	CL.21712.1	-0.670597	7,78001768156047e-06	0.000276861	2029.25	1677.25	1531.56	1473.46	992.729	1177.5	1036.71	1004.45
CL.12664	CL.12664.1	10.8743	7,9585314390862e-06	0.000282962	0	0	0	0	878.452	0	333.129	286.422
CL.32605	CL.32605.2	-2.01956	8,00996797092497e-06	0.000284538	1273.73	1035.6	1001.97	583.571	211.98	101.708	355.245	292.992
CL.23189	CL.23189.1	0.717604	8,2068386013296e-06	0.000291205	161.436	153.739	149.213	187.947	271.3	262.121	276.455	262.773
CL.30219	CL.30219.1	-2.36713	8,21215775119832e-06	0.000291205	337.401	329.897	578.296	404.969	71.5324	25.2565	105.053	118.905
CL.3857	evm.model.group1.2998	-1.40968	8,26230102958709e-06	0.000292724	1205.93	955.528	954.033	627.183	444.896	342.669	396.713	225.328
CL.22285	CL.22285.7	-3.6756	8,47207283455243e-06	0.00029989	248.611	147.333	142.255	149.527	20.064	18.4304	0	14.4525
CL.11641	evm.model.group2.618	-1.90454	8,49667693979818e-06	0.000300496	83.9467	172.956	110.557	154.719	50.5961	28.6695	33.1746	27.5911
CL.23429	CL.23429.1	-8.45325	8,61056289624074e-06	0.000304255	114.62	85.4103	13.1431	8.30705	0	0	0	0
CL.19654	evm.model.group4.1278	-1.58911	8,66668985088286e-06	0.000305969	1012.2	1074.04	1000.42	447.543	209.363	297.617	299.954	367.225
CL.1409	evm.model.group1.1157	-1.21309	8,68157439156997e-06	0.000306224	644.13	508.192	405.116	589.801	191.916	306.49	187.99	236.496
CL.15697	CL.15697.2	-1.85837	8,7607975529334e-06	0.000308747	1083.24	779.369	808.686	665.603	321.023	126.965	331.746	142.554
CL.7020	CL.7020.1	2.31681	8,91803773945104e-06	0.000314012	274.441	98.2219	256.677	233.636	663.855	511.955	1733.37	1390.07
CL.17020	CL.17020.2	-1.57249	9,07652879655867e-06	0.000319312	342.244	787.91	958.672	785.017	241.64	270.995	241.898	212.846
CL.17497	CL.17497.3	1.47206	9,10284050421375e-06	0.000319957	50.0452	91.8161	99.7328	92.416	209.363	257.343	284.749	183.284
CL.14403	CL.14403.1	10.6333	9,11613309175721e-06	0.000320143	0	0	0	0	800.813	231.404	0	235.182
CL.75	CL.75.2	1.05142	9,20765703687485e-06	0.000323074	117.848	87.5456	98.9597	92.416	241.64	217.752	171.402	186.569
CL.4415	CL.4415.1	-10.6562	9,25323123647317e-06	0.000324389	421.348	0	224.205	372.779	0	0	0	0
CL.14444	CL.14444.1	-0.769155	9,26794915884563e-06	0.000324621	826.553	662.998	675.709	661.449	373.364	381.577	505.913	400.072
CL.13345	CL.13345.1	8.41283	9,39603246793943e-06	0.00032882	0	0	0	0	202.384	25.2565	33.1746	11.1678
CL.3027	CL.3027.1	-0.817484	9,44506349524262e-06	0.000330248	1507.81	1360.16	957.126	1311.48	809.537	693.529	677.315	730.509
CL.27276	CL.27276.6	-0.956296	9,54430820204942e-06	0.000333427	461.707	529.544	543.505	569.033	328.874	253.247	200.43	299.561
CL.30343	evm.model.group8.978	1.54694	9,60417842584984e-06	0.000335226	431.034	438.796	242.76	339.551	751.962	1540.64	758.87	1184.45
CL.18600	CL.18600.6	7.84078	9,67710420624252e-06	0.000337477	0	0	0	0	77.6388	16.3826	77.4075	11.8248
CL.16095	CL.16095.1	3.54254	9,73157426222025e-06	0.000339082	3.22872	8.54103	48.7067	14.5373	246.874	174.747	294.425	174.744
CL.18541	CL.18541.2	-1.30506	9,74934791583579e-06	0.000339406	689.332	401.429	424.444	637.566	192.788	280.551	183.843	211.532
CL.15273	CL.15273.1	-5.09374	9,96293205694293e-06	0.000346541	93.6329	197.511	132.977	191.062	0	8.19128	0	9.19705
CL.31449	CL.31449.1	1.3196	9,99572662073931e-06	0.00034738	319.643	148.4	193.281	210.792	585.344	522.194	613.731	448.685
CL.21664	CL.21664.2	0.715006	1,00879012207897e-05	0.000350279	663.502	957.663	749.929	913.776	1427.16	1404.8	1257.87	1305.98
CL.22640	evm.model.group5.1344	10.5666	1,04781799070758e-05	0.000363516	0	0	0	0	567.025	505.129	0	137.956
CL.27053	CL.27053.1	-1.31067	1,05580271759137e-05	0.000365969	11918.8	22698.9	30738.6	19222.5	7410.58	7611.07	8147.14	10928.7
CL.34397	CL.34397.9	-8.88262	1,09121715558022e-05	0.000377918	8.0718	234.878	40.2024	14.5373	0	0	0	0
CL.5828	evm.model.group10.979	-1.89765	1,09492774580873e-05	0.000378875	2828.36	1266.21	1140.36	863.934	280.895	398.642	516.971	440.145
CL.24629	evm.model.group6.638	-0.892508	1,10119996830813e-05	0.000380717	468.165	560.505	419.032	580.455	300.087	307.173	230.84	252.262
CL.32999	CL.32999.1	7.7183	1,11028568457159e-05	0.000383527	0	0	0	0	49.7237	68.9433	42.8506	6.56932
CL.14970	CL.14970.1	1.5435	1,13082516572548e-05	0.000390286	471.393	337.371	693.491	452.734	1303.28	985.002	1223.31	2189.55
CL.24474	evm.model.group6.574	-2.95757	1,13419090704063e-05	0.00039111	8055.66	16517.3	6540.62	14378.5	2536.78	376.116	2518.51	426.349
CL.22802	CL.22802.1	-10.4571	1,13938391093154e-05	0.000392563	0	427.052	282.19	177.563	0	0	0	0
CL.1556	CL.1556.1	8.55553	1,15819432230805e-05	0.000398701	0	0	0	0	203.257	4.09564	45.6151	47.2991
CL.7697	CL.7697.1	1.63915	1,19537808011813e-05	0.000411148	40.359	66.193	102.052	96.5695	208.491	231.404	288.896	230.583
CL.14008	CL.14008.1	1.26894	1,20174536682582e-05	0.000412984	113.005	132.386	192.507	178.602	387.322	451.886	371.832	281.167
CL.29681	CL.29681.1	1.44517	1,22994419825428e-05	0.000422312	143.678	80.0722	168.541	190.024	365.513	467.586	393.949	359.999
CL.781	CL.781.1	-4.35149	1,23401162180525e-05	0.000423346	248.611	355.521	292.24	336.436	0	25.2565	29.0278	6.56932
CL.8348	CL.8348.1	8.45572	1,23701590807534e-05	0.000424014	0	0	0	0	170.107	6.14346	85.7011	18.3941
CL.29912	CL.29912.1	-2.19603	1,26450465920973e-05	0.000433066	101.705	220.999	152.305	113.184	45.362	15.7	37.3215	30.8758
CL.4532	evm.model.group1.3422	-2.31317	1,26989036905955e-05	0.000434539	85.5611	199.647	105.145	179.64	44.4896	26.6217	29.0278	15.1094
CL.31353	CL.31353.5	6.24584	1,2748086116883e-05	0.00043585	0	2.13526	0	0	24.4257	45.7347	73.2606	25.6204
CL.25264	evm.model.group6.1005	1.83122	1,29562791138982e-05	0.00044259	122.691	41.6375	63.396	86.1857	280.895	302.395	327.6	199.707
CL.16402	CL.16402.1	-6.09492	1,30400113034805e-05	0.000445071	313.186	742.002	1794.42	1524.34	40.1279	0	0	23.6496
CL.8117	evm.model.group12.201	0.484128	1,30913853628651e-05	0.000446444	29299	34093.7	37804.1	31061.1	47806.3	41519.6	46263.4	49417.7
CL.14104	CL.14104.1	10.6175	1,318005380524e-05	0.000449086	0	0	0	0	410.003	0	604.055	239.78
CL.21867	CL.21867.1	-0.784243	1,32578284098944e-05	0.000451352	913.728	1061.22	1237	1307.32	571.386	620.49	753.341	683.866
CL.2157	CL.2157.1	0.784342	1,33993374133332e-05	0.000455782	219.553	279.719	290.694	261.672	522.535	408.881	411.918	472.991
CL.24913	CL.24913.1	1.8962	1,34784186083e-05	0.000458083	12.9149	26.6907	20.8743	16.6141	95.0857	55.9738	70.4961	68.9779
CL.16596	evm.model.group3.1998	-1.8441	1,3581602310978e-05	0.000461199	219.553	240.217	268.273	221.175	28.7874	67.5781	70.4961	97.226
CL.3337	CL.3337.2	-1.64989	1,36425484515932e-05	0.000462876	201.795	374.738	466.193	398.739	164.873	103.074	96.7593	95.2552
CL.1277	CL.1277.1	-2.34055	1,36688866874973e-05	0.000463378	153.364	262.637	163.902	128.759	32.2768	17.0652	64.967	27.5911
CL.19801	CL.19801.1	8.05006	1,3753951896581e-05	0.000465579	0	0	0	0	75.0217	15.7	111.964	9.19705
CL.9930	evm.model.group16.8	-1.7936	1,375705100559e-05	0.000465579	2923.61	3723.89	4967.31	3513.88	664.727	757.694	861.158	2079.19
CL.15267	evm.model.group3.817	-5.80986	1,39709002800794e-05	0.000472417	895.97	1272.61	3333.7	2918.89	0	6.14346	5.52911	137.956
CL.17758	CL.17758.1	1.25639	1,40583265507675e-05	0.000474972	482.694	401.429	362.594	255.442	733.643	843.019	1223.31	786.348
CL.13873	CL.13873.1	-11.0195	1,41953329900381e-05	0.000479197	1026.73	147.333	0	136.028	0	0	0	0
CL.12228	CL.12228.8	8.3209	1,42198092223654e-05	0.000479619	0	0	0	0	163.129	4.77825	52.5265	34.8174
CL.13396	CL.13396.2	-0.76191	1,42607294108626e-05	0.000480595	818.481	696.094	937.024	853.55	398.662	483.968	523.883	543.94
CL.5870	evm.model.group10.1021	1.13923	1,45659856924181e-05	0.00049047	713.547	883.997	658.7	803.708	1971.5	2247.82	1255.11	1263.28
CL.4824	CL.4824.1	-10.6104	1,45836949630418e-05	0.000490654	463.321	300.004	0	223.252	0	0	0	0
CL.30035	evm.model.group8.777	-2.11863	1,46682996724445e-05	0.000493086	5650.26	6102.57	10574.8	4791.09	900.261	645.063	2616.65	2084.45
CL.25420	CL.25420.3	-0.872156	1,47647494132113e-05	0.000495912	791.037	686.486	725.962	518.153	427.449	357.686	322.07	377.079
CL.25209	CL.25209.2	7.70519	1,48615157678299e-05	0.000498745	0	0	0	0	6.97877	59.3868	29.0278	70.9487
CL.33705	CL.33705.1	1.23558	1,49227628098646e-05	0.000500381	163.05	119.574	156.171	197.293	355.917	289.425	499.002	356.057
CL.33248	evm.model.utg166_5246104_5260942__.1	-2.57891	1,49896532922988e-05	0.000502204	1869.43	752.679	586.8	298.016	181.448	149.491	171.402	84.7442
CL.1972	evm.model.group1.1773	-0.513846	1,50351439061549e-05	0.000503307	4328.1	5058.43	4698.26	4729.83	2787.14	3346.82	3734.91	3314.88
CL.8421	CL.8421.1	1.34948	1,50744649199298e-05	0.000504089	695.789	538.085	531.135	303.208	1174.18	1258.04	1748.58	1086.57
CL.17053	evm.model.group3.2304	-0.827746	1,50836827444621e-05	0.000504089	1741.89	1724.22	1685.41	1792.25	1180.28	888.754	717.401	1121.38
CL.28152	evm.model.group7.1413	8.31892	1,54020408561485e-05	0.0005143	0	0	0	0	4.36173	24.5738	106.435	119.562
CL.16764	CL.16764.1	-0.43225	1,54500126677716e-05	0.000515472	36641.1	33359.1	34751.1	33337.2	25637.4	21943.8	26161	28594.9
CL.5963	evm.model.group10.1200	-2.72473	1,55082154266176e-05	0.000516984	37.1303	67.2606	44.8411	44.6504	11.3405	2.73043	6.91138	8.54012
CL.10873	evm.model.group2.106	1.44749	1,55221264490658e-05	0.000517017	1025.12	2216.4	1417.13	1503.58	3952.6	2497.66	5718.48	4643.85
CL.14092	CL.14092.1	-10.4385	1,55425194855231e-05	0.000517266	311.572	259.434	304.61	0	0	0	0	0
CL.33355	CL.33355.1	-10.5684	1,61046013194308e-05	0.000535528	558.569	0	148.439	251.288	0	0	0	0
CL.31089	CL.31089.1	-1.94151	1,62581352121601e-05	0.000540185	227.625	191.106	207.197	80.9938	41.8726	40.2738	40.086	61.0947
CL.2721	CL.2721.1	6.41453	1,63568250119491e-05	0.000543014	0	0	0	8.30705	311.427	108.534	215.635	82.7734
CL.13241	CL.13241.1	1.67494	1,6831793303859e-05	0.00055832	133.992	46.9757	88.9091	74.7635	234.661	275.773	334.511	250.291
CL.6621	evm.model.group11.247	-8.20712	1,68530743601004e-05	0.000558563	4074.65	8140.67	28181.1	2345.7	0	12.9695	0	131.386
CL.13373	evm.model.group2.1824	-0.856463	1,69079049339504e-05	0.000559917	9066.25	6395.1	5715.69	6261.44	4410.58	3170.03	4126.09	3446.92
CL.34798	CL.34798.1	8.43148	1,73153004451367e-05	0.000572935	0	0	0	0	138.703	27.3043	106.435	3.28466
CL.16949	CL.16949.1	0.734572	1,77665558752071e-05	0.000587381	1314.09	1544.86	1635.15	1579.38	2401.57	2119.49	3204.12	2392.55
CL.31219	evm.model.group8.1587	1.59	1,78021069272762e-05	0.000588071	122.691	328.83	272.912	154.719	755.451	628.681	608.202	660.874
CL.17192	CL.17192.1	0.59366	1,78572974616537e-05	0.000588923	6965.97	7376.25	8117.01	6405.78	9010.46	10786.6	11156.4	12609.2
CL.18390	CL.18390.1	0.964463	1,78568050985185e-05	0.000588923	364.845	253.028	282.19	397.7	546.088	737.215	606.819	637.224
CL.23364	evm.model.group5.1830	-4.85755	1,82625840235896e-05	0.000601794	1068.71	872.253	2016.3	708.176	68.9153	6.14346	0	85.4012
CL.26001	CL.26001.1	0.744761	1,86403677793839e-05	0.000613738	219.553	248.758	184.003	242.981	397.79	390.451	344.187	363.94
CL.31877	evm.model.group9.362	-4.00523	1,88043150183647e-05	0.000618628	345.473	606.413	661.793	506.73	27.9151	56.6564	0	46.6422
CL.11775	CL.11775.1	0.729991	1,90099473571392e-05	0.00062488	923.414	792.181	860.485	866.01	1472.52	1081.25	1642.14	1514.89
CL.16615	CL.16615.1	0.493925	1,91417206590551e-05	0.000628696	458.478	512.462	471.605	520.229	662.983	746.772	639.994	712.114
CL.19183	evm.model.group4.984	6.03715	1,92204033661358e-05	0.000630763	0	0	4.63873	0	73.277	30.7173	129.934	107.08
CL.27206	CL.27206.2	6.39422	1,94258636803204e-05	0.000636984	0	0	2.31937	0	26.1704	113.995	71.8784	21.0218
CL.12228	CL.12228.5	5.13482	1,95049358259825e-05	0.000639054	0	7.4734	4.63873	0	122.128	163.143	27.6455	126.131
CL.29149	CL.29149.1	-0.805422	1,96411272166297e-05	0.000642465	527.896	493.245	563.606	411.199	278.278	245.738	286.131	331.751
CL.4711	CL.4711.1	-1.51092	1,96394236476166e-05	0.000642465	314.8	648.051	685.76	761.134	228.555	155.634	207.341	254.89
CL.16542	evm.model.group3.1912	1.59265	2,02709784649933e-05	0.000662527	406.819	141.995	209.516	252.327	785.111	836.193	852.865	566.275
CL.29904	CL.29904.5	-1.35942	2,10692080997621e-05	0.000688055	553.726	327.762	388.881	277.248	116.894	170.652	136.845	176.715
CL.959	evm.model.group1.764	0.734806	2,12069870962313e-05	0.00069199	1946.92	1959.1	1649.07	2472.39	2751.38	3483.34	3461.22	3661.08
CL.20635	CL.20635.1	-0.569591	2,13386420781717e-05	0.00069572	4328.1	4511.8	4239.03	4609.38	3047.1	2368.65	3112.89	3391.74
CL.25888	CL.25888.2	-6.40765	2,15807066461468e-05	0.00070304	256.683	100.357	64.9423	68.5332	0	5.46085	0	0
CL.994	evm.model.group1.806	-1.07371	2,17884663228895e-05	0.000709231	1178.48	1110.33	910.738	1059.15	710.089	361.099	481.032	471.02
CL.13249	CL.13249.1	10.4826	2,18918078777055e-05	0.000712017	0	0	0	0	657.749	0	291.66	192.481
CL.29023	evm.model.group8.14	-0.667586	2,19860231970911e-05	0.000714501	821.709	934.176	748.382	816.168	526.897	558.372	425.741	573.502
CL.33247	CL.33247.2	-2.17585	2,21944311190448e-05	0.00072069	269.598	144.13	252.038	242.981	20.9363	81.9128	40.086	57.1531
CL.24207	evm.model.group6.404	2.31658	2,30563274627386e-05	0.00074807	33.9016	30.9612	25.513	16.6141	178.831	184.986	107.818	58.467
CL.2797	evm.model.group1.2267	1.49705	2,34095849577084e-05	0.000758918	30.6728	24.5555	30.1518	18.6909	85.4899	71.6737	63.5847	71.6056
CL.8647	CL.8647.1	10.4774	2,36774375383545e-05	0.000766981	0	0	0	0	849.665	109.9	0	178.029
CL.4093	CL.4093.2	-4.59335	2,37428856111856e-05	0.000768479	229.239	240.217	39.4292	131.874	13.0852	5.46085	8.29366	0
CL.4065	CL.4065.2	-5.85241	2,39875054122379e-05	0.00077577	38.7446	37.367	65.7154	29.0747	0	0	0	2.62773
CL.14982	CL.14982.1	8.67232	2,43017971052053e-05	0.000785301	0	0	0	0	236.406	6.14346	73.2606	9.85398
CL.23973	CL.23973.1	-3.673	2,43245532976357e-05	0.000785403	216.324	77.9369	75.766	21.806	10.4681	8.19128	9.67593	2.62773
CL.3897	evm.model.group1.3015	-1.861	2,43961945409277e-05	0.000787082	256.683	364.062	159.263	249.212	107.299	73.7215	59.4379	42.7006
CL.23203	CL.23203.1	2.34265	2,45922160330118e-05	0.000792768	22.601	8.54103	17.0087	31.1515	102.064	144.03	67.7315	86.0581
CL.27948	CL.27948.2	1.37954	2,47296089698255e-05	0.000796556	74.2606	88.6132	139.935	117.337	268.682	361.782	225.311	242.408
CL.7383	CL.7383.3	-1.59467	2,49280008438744e-05	0.000802301	154.979	254.096	211.062	148.489	83.7452	45.7347	48.3797	76.2041
CL.15711	CL.15711.2	-5.86656	2,57048604563476e-05	0.00082664	71.0319	71.5312	44.068	71.6483	0	4.09564	0	0
CL.18193	evm.model.group4.352	-0.792854	2,58059160292329e-05	0.000829097	3362.71	4174.43	3970.76	3812.94	1682.75	2176.83	2857.17	2132.4
CL.27475	evm.model.group7.935	-0.777364	2,58226389087854e-05	0.000829097	894.356	1058.02	687.306	809.938	547.833	520.829	476.885	465.108
CL.17622	evm.model.group3.2646	-1.8408	2,59293246489813e-05	0.000831856	242.154	100.357	122.926	136.028	28.7874	47.0999	51.1442	40.7298
CL.25296	CL.25296.4	-0.74978	2,63475742032573e-05	0.000844598	2151.94	3025.66	2947.92	2917.85	1442.86	1425.97	1886.81	1817.07
CL.13585	CL.13585.1	10.3839	2,66089905085335e-05	0.000852296	0	0	0	0	0	191.813	682.845	191.824
CL.22087	CL.22087.1	10.352	2,67058142891348e-05	0.000854714	0	0	0	0	378.598	191.813	472.739	0
CL.22226	CL.22226.4	-3.2753	2,68423937888408e-05	0.0008584	594.085	351.25	490.933	435.082	116.894	8.19128	17.9696	49.9268
CL.15793	CL.15793.1	10.3927	2,68930444806927e-05	0.000859334	0	0	0	0	408.258	0	515.589	149.124
CL.27661	CL.27661.5	1.03829	2,69737967894781e-05	0.00086122	261.526	366.197	434.495	271.018	618.493	605.472	814.161	708.83
CL.8021	CL.8021.1	2.03667	2,6995059529478e-05	0.00086122	62.9601	39.5023	74.9929	22.8444	222.448	189.082	268.162	143.211
CL.27823	CL.27823.1	1.64032	2,75505019928937e-05	0.000878241	75.8749	103.56	37.883	56.0726	193.661	208.195	243.281	203.649
CL.11377	CL.11377.3	1.11858	2,77689580329937e-05	0.000884501	140.449	237.014	267.5	168.218	423.96	451.886	465.827	432.261
CL.28969	CL.28969.1	-10.6332	2,77931067027247e-05	0.000884567	642.515	285.057	0	74.7635	0	0	0	0
CL.33843	CL.33843.1	-0.732646	2,79811965687169e-05	0.000889846	3243.25	4695.43	4381.28	4180.53	2216.63	2151.58	2633.24	2931.89
CL.18724	CL.18724.1	0.508996	2,81534618179757e-05	0.000894615	942.786	1226.71	1166.64	1134.95	1459.43	1630.07	1669.79	1614.08
CL.33381	CL.33381.1	3.41635	2,82313084894666e-05	0.000896378	33.9016	11.7439	14.6893	91.3776	664.727	492.16	338.658	122.846
CL.29924	evm.model.group8.676	1.14139	2,83203545344934e-05	0.000898493	217.939	399.293	217.247	343.704	638.557	703.085	649.67	609.633
CL.4786	evm.model.group10.72	10.0987	2,85161639186898e-05	0.000903989	0	0	0	0	356.789	378.164	0	139.927
CL.15392	evm.model.group3.864	-1.42544	2,86420285903927e-05	0.000907262	3537.06	3518.91	3814.59	3747.52	1063.39	802.746	2355.4	1225.18
CL.3431	CL.3431.1	-1.24483	2,98685190180959e-05	0.000945365	3367.56	3134.56	2283.8	3639.53	1939.22	1387.74	1003.53	911.165
CL.22686	evm.model.group5.1364	1.44223	3,01323895416228e-05	0.000952964	258.298	270.11	532.681	219.099	866.239	806.841	1049.15	764.669
CL.6366	CL.6366.1	-1.06212	3,02991079973755e-05	0.00095748	3876.08	3670.51	5963.09	3103.72	1550.16	1879.9	2308.4	2220.43
CL.14111	evm.model.group2.2396	1.65746	3,0476878233228e-05	0.000962339	11051.9	4811.81	17689	10065	25515.2	25638	46751.4	39697.1
CL.28743	CL.28743.1	7.67815	3,06437598894759e-05	0.000966086	0	0	0	0	75.0217	6.14346	60.8202	21.6788
CL.9341	CL.9341.3	-0.557028	3,06270973464417e-05	0.000966086	1522.34	1632.41	1462.75	1806.78	1081.71	939.95	1206.73	1142.4
CL.2420	CL.2420.1	5.92816	3,11989037670987e-05	0.000982815	0	0	9.27747	3.11515	257.342	452.568	30.4101	45.3283
CL.32120	CL.32120.1	4.29059	3,12552421218935e-05	0.000983816	12.9149	4.27052	3.86561	0	48.8514	61.4346	197.666	89.3428
CL.27283	evm.model.group7.841	-2.16665	3,14237189568699e-05	0.000988343	849.154	782.572	688.852	694.677	318.406	113.995	56.6733	181.313
CL.33678	evm.model.utg386_11027284_11496772__.20	1.0226	3,14599496716726e-05	0.000988706	269.598	352.318	322.392	231.559	496.365	532.433	591.614	769.924
CL.11652	CL.11652.3	2.30851	3,14881472551027e-05	0.000988817	66.1888	33.0965	47.9336	23.8828	256.47	108.534	146.521	331.094
CL.34943	CL.34943.1	10.4949	3,17799248815403e-05	0.000997198	0	0	0	0	408.258	0	660.728	82.7734
CL.25073	CL.25073.1	10.4405	3,18101352440876e-05	0.000997365	0	0	0	0	0	71.6737	612.348	425.035
CL.19572	CL.19572.1	-1.2296	3,19581796386924e-05	0.00100044	290.585	360.859	330.123	218.06	125.618	169.969	103.671	111.022
CL.27521	CL.27521.1	10.1815	3,19537346899451e-05	0.00100044	0	0	0	0	584.472	223.895	0	118.248
CL.23578	CL.23578.1	-1.82251	3,24579035329801e-05	0.00101529	261.526	518.868	750.702	513.999	99.4474	103.756	181.078	195.109
CL.3060	CL.3060.4	-1.62462	3,27414116615468e-05	0.00102256	631.215	355.521	453.05	415.353	121.256	204.782	192.136	84.0873
CL.34404	CL.34404.1	6.12228	3,27669778730674e-05	0.00102256	0	0	0.773122	1.03838	6.10642	32.0825	46.9974	61.0947
CL.13165	evm.model.group2.1678	-1.25766	3,27538055058724e-05	0.00102256	1381.89	2248.43	2961.06	1575.23	697.004	755.646	902.626	1061.6
CL.300	CL.300.1	0.969388	3,30223447456024e-05	0.00102973	2373.11	3289.37	2647.17	3379.93	5444.31	6710.71	3862.08	6869.54
CL.28173	CL.28173.1	0.35122	3,33821813032748e-05	0.00104014	3842.18	4378.35	3733.41	3742.33	5289.9	4823.3	4837.97	5068.89
CL.5755	CL.5755.3	-5.7784	3,34617008141319e-05	0.00104072	43.5877	41.6375	73.4466	45.6888	0	3.41303	0	0
CL.977	CL.977.2	-1.14844	3,34648856843145e-05	0.00104072	2347.28	3751.65	2834.27	2195.14	1771.73	1157.7	1137.61	953.865
CL.9932	evm.model.group16.11	-5.93065	3,3478661700784e-05	0.00104072	19.3723	51.2462	52.5723	60.2261	0	2.73043	0	0
CL.4378	evm.model.group1.3286	-7.63759	3,35386124244673e-05	0.00104178	3758.23	5042.41	22757.6	1781.86	0	94.8824	0	72.2625
CL.21611	CL.21611.1	10.3465	3,35898772560925e-05	0.00104256	0	0	0	0	787.728	111.265	0	139.927
CL.28627	CL.28627.1	10.544	3,36238700659378e-05	0.00104281	0	0	0	0	0	260.756	863.923	67.0071
CL.15614	CL.15614.1	1.30028	3,38583645371777e-05	0.00104846	69.4175	95.019	70.3541	133.951	226.81	207.512	257.103	219.415
CL.29308	evm.model.group8.247	-4.93575	3,38571787045839e-05	0.00104846	5829.46	6237.09	5866.45	5019.54	389.939	24.5738	0	335.035
CL.24723	CL.24723.1	1.20734	3,40568519342649e-05	0.00105379	48.4308	45.9081	42.5217	32.1898	95.958	101.708	82.9366	106.423
CL.32465	CL.32465.1	-9.97343	3,42383500721026e-05	0.00105859	0	210.323	223.432	200.408	0	0	0	0
CL.34003	CL.34003.1	-5.50896	3,43134320881229e-05	0.00106009	58.117	402.496	469.285	247.135	0	10.2391	0	15.1094
CL.33843	evm.model.utg4551_431494_512601__.1	-0.472061	3,44157715448794e-05	0.00106243	8409.2	8467.37	9019.25	8492.93	6693.51	6418.55	5054.98	6617.28
CL.11683	evm.model.group2.643	-0.969205	3,45295174697488e-05	0.00106513	5010.97	3732.43	4901.6	4848.2	1715.9	1911.98	2835.05	2984.44
CL.33606	CL.33606.2	-1.19353	3,48980616708585e-05	0.00107567	1880.73	1636.68	1993.88	1403.89	557.429	524.925	977.269	965.69
CL.19043	CL.19043.1	10.4969	3,50004270729518e-05	0.00107799	0	0	0	0	628.089	0	457.533	67.664
CL.34639	CL.34639.1	-0.70543	3,62087236598045e-05	0.00111435	8233.24	8528.22	8532.18	6722.48	3666.47	5068.36	5273.38	5625.97
CL.30893	CL.30893.1	-1.79518	3,66291209409973e-05	0.00112642	1693.46	4170.16	6048.91	3266.75	916.835	690.116	1136.23	1631.16
CL.7748	evm.model.group11.1107	0.819609	3,72363364406289e-05	0.00114334	2410.24	2849.5	3626.72	2773.52	6075.89	3899.73	5060.51	5551.08
CL.8737	evm.model.group12.877	-0.67499	3,72185902682484e-05	0.00114334	1882.34	2544.16	1760.4	1878.43	1287.58	1203.44	1398.86	1164.74
CL.34640	CL.34640.4	1.95652	3,76605732183508e-05	0.00115548	82.3324	86.478	51.0261	32.1898	160.512	224.578	367.686	222.7
CL.20413	CL.20413.1	10.1623	3,79873814498612e-05	0.00116373	0	0	0	0	599.302	98.2954	0	216.788
CL.5563	CL.5563.1	0.92924	3,79592755655491e-05	0.00116373	626.372	495.38	709.726	431.967	936.899	1063.5	1015.97	1292.84
CL.18692	evm.model.group4.683	-4.46518	3,84504343032196e-05	0.00117701	64.5744	54.4491	18.5549	16.6141	2.61704	0.682607	0	3.28466
CL.21206	CL.21206.1	-1.05021	3,855313187198e-05	0.00117925	1078.39	1296.1	1550.88	1592.88	615.004	902.406	483.797	661.531
CL.34532	evm.model.utg756_3513843_3770622__.1	0.367091	3,87490062861396e-05	0.00118434	41505.2	44190.2	39939.5	38720.2	56559.4	52882.9	46736.1	55786.7
CL.8676	CL.8676.3	-10.4195	3,88476528340469e-05	0.00118645	592.47	0	203.331	68.5332	0	0	0	0
CL.3038	CL.3038.1	-1.33404	3,96545830206293e-05	0.00121017	1964.68	2562.31	1893.38	1741.37	1150.62	946.776	450.622	687.151
CL.27973	CL.27973.1	10.3653	3,97237484636642e-05	0.00121136	0	0	0	0	0	131.061	772.692	149.124
CL.12434	CL.12434.1	10.5378	4,00007214381102e-05	0.00121796	0	0	0	0	822.622	0	60.8202	302.846
CL.12898	CL.12898.1	1.17446	3,99862019414144e-05	0.00121796	255.069	134.521	197.146	161.988	324.513	455.981	468.592	436.203
CL.21380	CL.21380.1	-0.934825	4,02241142709985e-05	0.00122383	2581.36	5138.5	4070.49	4251.14	2326.55	1968.64	1931.04	2166.56
CL.5598	CL.5598.1	10.0597	4,0395363244094e-05	0.0012281	0	0	0	0	0	392.499	225.311	233.868
CL.6857	evm.model.group11.416	-1.86709	4,05988683139526e-05	0.00123336	45.2021	83.2751	64.1692	78.917	12.2128	21.8434	24.881	16.4233
CL.7389	CL.7389.1	0.443663	4,08385972061232e-05	0.0012397	1740.28	2135.26	1901.11	2205.52	2744.4	2569.33	2839.2	2713.13
CL.22495	CL.22495.1	-10.0668	4,11445334453563e-05	0.00124804	282.513	0	185.549	208.715	0	0	0	0
CL.2978	evm.model.group1.2373	-1.08386	4,12435843555248e-05	0.0012501	2645.94	3004.31	2768.55	3407.97	1306.77	853.941	1896.48	1526.05
CL.22846	CL.22846.2	3.06821	4,14719492454973e-05	0.00125607	46.8165	28.826	10.0506	23.8828	60.1919	148.808	378.744	323.211
CL.797	evm.model.group1.577	-5.1676	4,19361776196309e-05	0.00126917	51.6595	48.0433	16.2356	29.0747	0	0	1.38228	2.62773
CL.3514	CL.3514.1	10.4332	4,20960702324768e-05	0.00127305	0	0	0	0	287.002	79.865	736.753	0
CL.6966	CL.6966.1	0.521941	4,21449432433408e-05	0.00127357	2323.06	2736.33	2586.09	2534.69	3820.87	3004.84	3768.09	4030.28
CL.9877	CL.9877.1	-1.45368	4,2817486846135e-05	0.00129291	1142.97	2472.63	1915.8	1317.71	771.154	567.246	387.037	773.866
CL.29341	CL.29341.1	-2.41062	4,29482963521233e-05	0.00129589	1276.96	3296.84	2622.43	775.671	481.535	121.504	487.944	409.269
CL.12574	CL.12574.1	-0.69156	4,30514727156127e-05	0.00129802	1044.49	1006.77	1027.48	1130.8	704.855	754.281	497.619	644.45
CL.26096	CL.26096.4	-1.41387	4,42964562544107e-05	0.00133456	96.8616	82.2075	108.237	109.03	35.7662	40.9564	23.4987	46.6422
CL.33671	CL.33671.1	-0.695856	4,43776973906711e-05	0.001336	1574	1370.84	1772	1548.23	759.813	957.697	1049.15	1102.33
CL.33608	evm.model.utg349_3200640_3770178__.12	-0.862343	4,44655464907237e-05	0.00133764	14107.9	10444.6	12754.2	11223.9	4685.37	6102.51	7724.16	8182.75
CL.27286	evm.model.group7.842	1.376	4,56533138393266e-05	0.00137234	314.8	435.593	374.964	576.302	1161.96	1238.25	1400.25	620.801
CL.26059	CL.26059.1	1.17416	4,61124217753415e-05	0.0013851	915.342	697.162	586.027	996.847	1681.01	2574.11	1371.22	1577.95
CL.17261	CL.17261.1	8.28592	4,66730262516078e-05	0.00140089	0	0	0	0	172.724	6.14346	9.67593	60.4378
CL.18977	CL.18977.1	10.131	4,70486492520776e-05	0.00141111	0	0	0	0	0	221.847	540.47	132.7
CL.22899	CL.22899.1	10.0422	4,74395365157806e-05	0.0014207	0	0	0	0	287.002	0	279.22	275.255
CL.30341	CL.30341.3	-1.24087	4,74376997076504e-05	0.0014207	674.803	456.945	340.947	391.47	209.363	184.304	157.58	234.525
CL.5242	evm.model.group10.518	-0.946761	4,79559035292913e-05	0.0014351	639.287	574.385	548.144	399.777	258.214	236.865	340.04	287.736
CL.31927	CL.31927.1	1.62328	4,84887794422807e-05	0.00144996	439.106	290.395	371.099	138.105	1006.69	976.81	1151.44	678.611
CL.12809	evm.model.group2.1487	-0.503537	4,93537143429251e-05	0.00147472	26047.7	32185.8	31739.8	33256.3	18722.3	23463.2	21141.9	23597
CL.15654	evm.model.group3.1146	-1.68283	4,99343804596917e-05	0.00149096	243.768	418.511	524.177	302.169	176.214	114.678	73.2606	99.1968
CL.12695	evm.model.group2.1430	-3.94678	5,00161099620245e-05	0.00149229	521.438	193.241	430.629	204.561	3.48938	2.73043	56.6733	25.6204
CL.10693	evm.model.group2.26	-1.37411	5,03203872603653e-05	0.00150025	634.444	929.905	572.884	832.782	299.215	363.147	156.197	324.524
CL.23735	CL.23735.1	10.1942	5,05157579759632e-05	0.00150496	0	0	0	0	536.493	0	111.964	286.422
CL.33469	evm.model.utg2548_775470_1020096__.5	0.538223	5,07562946814635e-05	0.001511	5186.94	4718.92	4757.8	4416.24	6268.68	5888.17	7731.07	7818.81
CL.23403	CL.23403.1	0.883905	5,08654420631176e-05	0.00151312	1593.37	1286.49	1176.69	915.853	2230.59	2122.22	2803.26	2016.12
CL.17351	CL.17351.1	10.1802	5,2797395569448e-05	0.00156943	0	0	0	0	0	262.121	579.174	84.7442
CL.12718	CL.12718.1	1.3635	5,30189390291815e-05	0.00157485	88.7898	116.372	82.7241	69.5716	299.215	265.534	171.402	181.97
CL.14808	CL.14808.1	-10.1945	5,31099231382006e-05	0.00157638	493.994	141.995	103.598	0	0	0	0	0
CL.22369	evm.model.group5.1042	-1.15743	5,31495925851744e-05	0.00157639	1940.46	1447.71	1190.61	1152.6	479.79	683.289	534.941	867.807
CL.3110	evm.model.group1.2500	-6.27794	5,33663679738455e-05	0.00158165	1919.47	2190.78	4736.92	686.37	0	0	106.435	17.0802
CL.5319	evm.model.group10.548	1.05768	5,40239336325934e-05	0.00159995	182.423	125.98	204.877	160.949	307.938	405.468	403.625	288.393
CL.21212	CL.21212.1	10.1565	5,42453524857282e-05	0.00160533	0	0	0	0	569.642	0	190.754	150.437
CL.17048	evm.model.group3.2300	-1.33388	5,43729012730847e-05	0.00160791	797.494	669.404	476.243	452.734	266.938	174.747	187.99	318.612
CL.13770	CL.13770.1	-1.34955	5,44337678140442e-05	0.00160853	413.276	974.746	694.264	610.569	193.661	259.391	301.336	303.503
CL.11980	CL.11980.1	1.14824	5,50081608794517e-05	0.0016243	1875.89	903.214	1615.05	1115.22	2357.08	3128.39	3017.51	3703.13
CL.1935	CL.1935.1	10.0268	5,56357983012549e-05	0.00164042	0	0	0	0	197.15	249.834	385.655	0
CL.33103	CL.33103.1	1.30841	5,56348601385848e-05	0.00164042	1808.08	790.046	899.914	889.893	2740.91	3195.97	2026.42	2892.47
CL.27428	CL.27428.1	-3.34338	5,57660032275746e-05	0.00164184	87.1755	44.8404	50.253	99.6847	4.36173	1.36521	16.5873	6.56932
CL.3246	CL.3246.1	8.23687	5,57503600966199e-05	0.00164184	0	0	0	0	155.278	8.87389	5.52911	70.9487
CL.28937	evm.model.group7.1891	0.810518	5,58941464281032e-05	0.0016444	857.225	576.52	908.419	640.682	1192.5	1307.87	1451.39	1280.36
CL.34387	evm.model.utg622_4137541_4295289__.2	-1.20716	5,61117446297323e-05	0.00164959	2733.11	1285.43	2204.95	3184.72	855.771	1065.55	1068.5	1084.59
CL.11818	CL.11818.1	7.95337	5,62632926048497e-05	0.00165284	0	0	0	0	62.8089	83.278	49.7619	1.9708
CL.24618	evm.model.group6.635	-1.02206	5,68898624806488e-05	0.00167002	1023.5	1281.16	1075.41	909.623	466.705	395.912	740.9	513.064
CL.33456	CL.33456.1	10.0939	5,69334324774164e-05	0.00167008	0	0	0	0	0	153.587	572.262	146.496
CL.14174	CL.14174.1	0.53023	5,75841949367696e-05	0.00168793	900.813	1004.64	991.143	945.966	1206.45	1546.1	1273.08	1522.11
CL.23919	CL.23919.1	2.98811	5,78352548759048e-05	0.00169405	11.3005	8.54103	1.54624	8.30705	54.0854	38.9086	91.2302	45.3283
CL.8367	CL.8367.1	-0.744852	5,80720136343111e-05	0.00169974	10231.8	16209.8	14155.9	12721.2	6565.27	8275.93	7613.58	9362.6
CL.2551	CL.2551.1	-1.91617	5,81981843775503e-05	0.00170219	537.582	689.688	529.589	408.084	164.001	64.165	98.1416	246.35
CL.2477	CL.2477.1	1.88159	5,84612065565172e-05	0.00170864	258.298	399.293	409.755	138.105	724.919	919.471	1855.01	947.296
CL.20351	CL.20351.1	-1.50852	5,89939393139671e-05	0.00172295	1372.21	1683.65	2158.56	1886.74	443.152	331.064	858.394	865.18
CL.4094	CL.4094.1	1.11838	5,91108476970907e-05	0.00172511	101.705	148.4	126.019	123.567	251.236	360.416	266.779	208.904
CL.33772	CL.33772.1	6.34134	5,9733812958909e-05	0.00174202	0	0	0	13.499	375.981	403.421	226.693	97.8829
CL.11543	CL.11543.4	-9.97683	5,98299941196501e-05	0.00174355	326.101	159.077	150.759	0	0	0	0	0
CL.30988	CL.30988.1	9.77206	6,01785210835552e-05	0.00175116	0	0	0	0	137.831	333.112	0	226.642
CL.26986	evm.model.group7.663	0.547369	6,01562241630651e-05	0.00175116	264.755	289.328	290.694	259.595	400.407	390.451	452.004	378.393
CL.6949	CL.6949.1	10.4097	6,11240745884772e-05	0.00177739	0	0	0	0	484.152	36.1782	565.351	0
CL.18271	evm.model.group4.388	-0.579491	6,13909419029231e-05	0.00178385	64020.7	59556.6	77876.6	75419.8	41228.8	41905.9	47231	54920.2
CL.17641	CL.17641.1	10.0466	6,17159919269644e-05	0.001792	0	0	0	0	431.811	0	286.131	126.131
CL.6116	CL.6116.1	-2.05386	6,20516378958054e-05	0.00180044	258.298	129.183	106.691	106.953	46.2343	19.7956	44.2328	34.8174
CL.6274	CL.6274.3	-9.74524	6,22440977094807e-05	0.00180472	0	172.956	206.424	161.988	0	0	0	0
CL.7058	CL.7058.1	0.559878	6,256930850917e-05	0.00181274	619.914	732.394	596.85	611.607	921.197	838.241	1068.5	951.238
CL.5526	evm.model.group10.718	-5.28866	6,2611237374936e-05	0.00181274	33.9016	162.28	176.272	223.252	4.36173	0	0	10.5109
CL.17736	CL.17736.1	-1.40647	6,29205133067771e-05	0.00182038	90.4042	131.318	112.103	77.8786	34.8938	31.3999	41.4683	47.956
CL.23205	CL.23205.1	0.503547	6,31629826370995e-05	0.00182608	3792.13	3343.81	3363.08	3394.47	4206.45	4916.82	4770.24	5794.14
CL.14945	evm.model.group3.567	0.406051	6,35596537486973e-05	0.00183622	4680.03	5744.91	5352.33	4770.33	6744.98	7157.13	6263.09	7063.33
CL.7262	CL.7262.1	0.643911	6,41607163310529e-05	0.00185225	558.569	566.911	530.362	487.001	677.813	952.919	816.925	896.712
CL.29182	CL.29182.1	2.92428	6,50039190324938e-05	0.00187524	6.45744	12.8116	28.6055	6.23029	56.7025	86.6911	179.696	96.569
CL.27595	evm.model.group7.976	-1.70249	6,58813198043616e-05	0.00189918	345.473	179.362	248.945	134.99	78.5111	47.0999	67.7315	85.4012
CL.12686	CL.12686.1	10.1581	6,73522076965496e-05	0.00193898	0	0	0	0	362.023	71.6737	478.268	0
CL.13838	CL.13838.1	1.42044	6,73587675988473e-05	0.00193898	62.9601	80.0722	106.691	63.3413	201.512	147.443	208.724	284.452
CL.8274	CL.8274.1	10.5107	6,74406057507226e-05	0.00193995	0	0	0	0	0	87.3737	1017.36	59.7808
CL.18527	CL.18527.2	-2.06307	6,76077275745586e-05	0.0019431	217.939	87.5456	74.9929	115.26	20.064	35.4956	35.9392	26.9342
CL.13563	evm.model.group2.1927	-2.40504	6,76473825342336e-05	0.0019431	113.005	269.043	174.726	350.973	28.7874	64.165	60.8202	18.3941
CL.27976	CL.27976.1	0.648582	6,86513296637995e-05	0.00197053	4993.22	6137.8	4429.22	4919.85	9725.78	7960.56	6784.21	7630.27
CL.4588	evm.model.group1.3448	-2.66323	6,88441664646854e-05	0.00197465	83.9467	101.425	76.5391	57.111	17.4469	14.3347	16.5873	2.62773
CL.32921	evm.model.group9.1255	5.99584	6,91792345298332e-05	0.00198284	0	0	0	2.07676	50.5961	39.5912	11.0582	39.4159
CL.34698	CL.34698.1	9.92698	6,93687638678413e-05	0.00198685	0	0	0	0	371.619	0	197.666	207.591
CL.23865	CL.23865.1	0.836675	6,96309859237298e-05	0.00199152	258.298	275.448	239.668	208.715	410.875	527.655	351.098	459.196
CL.29715	CL.29715.1	-1.49568	6,96141580962192e-05	0.00199152	248.611	330.965	447.638	436.12	174.469	105.804	80.172	157.664
CL.14711	evm.model.group3.379	9.96374	6,99473976392103e-05	0.00199914	0	0	0	0	418.726	0	154.815	223.357
CL.4680	evm.model.group1.3518	0.974879	7,02616819677989e-05	0.00200669	636.058	768.693	484.748	798.516	1500.43	1395.93	962.064	1420.29
CL.30034	evm.model.group8.774	-1.14384	7,08331828952614e-05	0.00202157	1038.03	1640.95	1158.14	1138.07	401.279	653.255	449.24	745.618
CL.13563	CL.13563.1	-1.36432	7,13730662680725e-05	0.00203264	555.34	629.901	568.245	532.69	287.002	275.773	109.2	213.503
CL.15061	CL.15061.1	-1.69049	7,13021448193862e-05	0.00203264	72.6462	129.183	88.9091	112.145	29.6598	19.7956	45.6151	31.5327
CL.25015	CL.25015.1	0.724286	7,13379411586899e-05	0.00203264	2050.24	1896.11	1711.69	1607.42	3491.13	3081.97	3209.65	2218.46
CL.3400	CL.3400.2	1.34263	7,18850327710795e-05	0.00204576	61.3457	82.2075	95.8672	122.529	217.214	308.538	205.959	189.853
CL.30643	CL.30643.1	10.162	7,30404998921596e-05	0.00207717	0	0	0	0	238.15	76.452	599.908	0
CL.4267	evm.model.group1.3235	0.308615	7,31066792289623e-05	0.00207758	3254.55	3340.61	3518.48	3051.8	4119.22	3959.12	4347.26	3893.64
CL.32527	CL.32527.1	0.941965	7,34618769493045e-05	0.00208619	142.064	154.806	127.565	121.491	198.895	286.695	308.248	254.89
CL.15263	evm.model.group3.816	1.02275	7,41291632922519e-05	0.00210365	736.148	1006.77	1021.29	682.217	1279.73	1970	1527.42	2227
CL.25898	CL.25898.1	9.66876	7,42643294078484e-05	0.002106	0	0	0	0	199.767	304.443	0	145.182
CL.7412	CL.7412.1	10.1999	7,47130257572287e-05	0.00211722	0	0	0	0	781.622	68.9433	0	88.0289
CL.5311	CL.5311.1	8.19598	7,51605450785051e-05	0.0021284	0	0	0	0	179.703	37.5434	5.52911	11.1678
CL.14105	CL.14105.1	1.58182	7,54075743826908e-05	0.00213389	9371.36	3763.39	15331	9246.79	23999.1	21252.3	36559.8	31084.7
CL.30197	evm.model.group8.846	-1.5064	7,64036452246509e-05	0.00216055	19761.4	10367.7	7943.06	13069.1	6860.13	2789.13	3331.29	5018.96
CL.11584	CL.11584.1	-1.69464	7,87821088084463e-05	0.00222623	1720.91	4403.97	4214.29	2331.17	1165.45	1413.68	529.412	804.742
CL.7634	CL.7634.1	-2.71941	7,90871724118924e-05	0.00223328	80.718	89.6809	119.834	191.062	7.85111	10.9217	41.4683	14.4525
CL.21528	CL.21528.1	7.70748	7,92485453317286e-05	0.00223626	0	0	0	0	62.8089	30.7173	2.76455	70.2917
CL.21931	CL.21931.1	10.0563	8,02040974356407e-05	0.00226163	0	0	0	0	575.748	0	120.258	153.722
CL.28134	CL.28134.1	1.12804	8,09971501739414e-05	0.00228239	3359.48	1927.07	2157.01	1570.03	3853.15	5399.42	6148.37	4293.05
CL.33373	CL.33373.1	3.1714	8,21146096306229e-05	0.00231225	0	4.27052	7.73122	7.26867	34.8938	62.7998	33.1746	50.5838
CL.6369	CL.6369.1	0.996327	8,24274045384016e-05	0.00231943	6409.01	8869.86	7645.41	5207.49	12137.8	10706.7	19620	13662.2
CL.13500	CL.13500.1	-0.451542	8,35004329079006e-05	0.00234719	1081.62	1218.16	1059.18	1048.77	806.92	761.107	754.723	896.712
CL.9899	CL.9899.1	-1.21026	8,35312533169349e-05	0.00234719	657.045	713.176	436.814	575.264	255.597	357.686	172.785	240.437
CL.16542	CL.16542.1	1.78665	8,41596710050089e-05	0.00236317	151.75	92.8837	196.373	56.0726	313.172	439.599	508.678	454.597
CL.19763	CL.19763.1	8.23563	8,42176259284925e-05	0.00236317	0	0	0	0	129.107	6.14346	100.906	4.59852
CL.17624	CL.17624.1	-2.30507	8,47712411579903e-05	0.00237704	166.279	95.019	78.0854	46.7272	30.5321	14.3347	16.5873	16.4233
CL.4934	CL.4934.1	1.1484	8,51639762301811e-05	0.00238638	95.2473	89.6809	102.825	72.6867	218.959	159.047	258.486	165.547
CL.5724	CL.5724.1	-3.22307	8,56823983807698e-05	0.00239923	1104.22	756.949	505.622	171.333	103.809	13.6521	125.787	29.5619
CL.5870	CL.5870.3	1.26039	8,58214966969791e-05	0.00240144	435.877	300.004	249.719	425.737	790.345	1204.12	769.928	610.947
CL.19748	CL.19748.1	9.84932	8,59801694714539e-05	0.0024042	0	0	0	0	0	181.573	429.888	124.817
CL.18178	CL.18178.1	1.25493	8,61297952842418e-05	0.00240671	80.718	155.874	90.4553	80.9938	240.767	236.182	221.164	276.568
CL.6680	CL.6680.1	0.379301	8,67336076576659e-05	0.00242189	2080.91	1741.3	1932.81	2043.54	2554.23	2620.53	2322.22	2634.95
CL.18688	CL.18688.1	-0.651472	8,87205074208757e-05	0.00247565	1987.28	1722.09	1413.27	1419.47	1013.67	963.841	1179.08	1007.73
CL.11777	evm.model.group2.687	0.610383	8,9214132307803e-05	0.00248769	3317.51	2256.97	2533.52	2514.96	3557.43	4091.55	4344.49	4215.53
CL.29186	CL.29186.2	1.55552	8,9665685856052e-05	0.00249681	106.548	124.913	143.801	95.5311	417.854	385.673	420.212	163.576
CL.31088	CL.31088.2	-2.3427	8,96451619382818e-05	0.00249681	195.338	155.874	201.012	188.986	7.85111	36.8608	52.5265	49.2699
CL.18379	evm.model.group4.456	1.6699	9,11095425827836e-05	0.00253525	251.84	122.777	295.333	134.99	530.386	429.36	916.449	686.494
CL.14620	CL.14620.1	-1.53433	9,12454142729799e-05	0.00253727	695.789	397.158	351.771	347.858	223.321	103.074	158.962	133.357
CL.15193	CL.15193.1	-0.95631	9,2489806904785e-05	0.00256831	329.33	406.767	438.36	457.926	227.682	222.53	146.521	242.408
CL.23331	CL.23331.1	-1.24373	9,24758285484505e-05	0.00256831	113.005	158.009	129.111	133.951	73.277	40.2738	51.1442	61.0947
CL.27724	CL.27724.1	-1.1114	9,3102798549698e-05	0.00258175	1023.5	1503.22	1073.87	1422.58	587.961	709.229	355.245	669.414
CL.9807	CL.9807.2	10.0706	9,30880461508634e-05	0.00258175	0	0	0	0	313.172	25.2565	0	519.633
CL.24046	CL.24046.1	-1.52149	9,33416779052292e-05	0.00258658	456.864	304.274	335.535	193.139	121.256	71.6737	113.347	142.554
CL.2519	CL.2519.1	0.857868	9,35769487816407e-05	0.00259131	1026.73	632.037	722.869	691.562	1322.48	1221.87	1702.96	1317.81
CL.8699	CL.8699.1	-0.744766	9,57604712240184e-05	0.00264995	976.688	1134.89	814.098	836.936	635.94	613.664	523.883	470.363
CL.5471	CL.5471.1	9.7912	9,64267425642241e-05	0.00266654	0	0	0	0	313.172	164.508	229.458	0
CL.26551	CL.26551.1	-2.31289	9,66363663363531e-05	0.0026705	179.194	129.183	144.574	137.066	6.97877	36.8608	30.4101	44.0145
CL.18250	CL.18250.1	-1.01673	9,76248014267174e-05	0.0026931	74404.3	145446	135357	105441	50171.2	45264.3	56228.2	76006.4
CL.4083	CL.4083.2	-9.63447	9,76558996562882e-05	0.0026931	0	162.28	95.0941	244.02	0	0	0	0
CL.13	evm.model.group1.16	-1.11653	9,75962075554095e-05	0.0026931	2298.85	3178.33	3064.66	3921.97	1305.9	1830.75	894.333	1714.59
CL.28000	CL.28000.1	-9.56168	9,77665795992902e-05	0.0026943	0	176.159	153.078	147.45	0	0	0	0
CL.11756	CL.11756.1	-9.94771	9,8038968080592e-05	0.00269995	422.962	92.8837	107.464	0	0	0	0	0
CL.27247	CL.27247.1	9.89561	9,8160327715281e-05	0.00270009	0	0	0	0	456.237	122.869	181.078	0
CL.29754	CL.29754.3	9.61181	9,81791151454726e-05	0.00270009	0	0	0	0	348.066	148.126	0	128.102
CL.21422	CL.21422.1	-9.98263	9,87135298893832e-05	0.00271293	0	487.907	94.3209	56.0726	0	0	0	0
CL.1962	CL.1962.2	-2.13894	9,91504952868836e-05	0.00272307	1819.38	5345.62	1955.23	3052.84	1178.54	742.676	226.693	614.888
CL.20863	CL.20863.3	-1.48263	0.00010012	0.00274782	379.375	211.391	297.652	241.943	149.171	94.8824	96.7593	63.7224
CL.18436	evm.model.group4.489	-9.953	0.00010188	0.0027942	301.885	254.096	0	69.5716	0	0	0	0
CL.22885	CL.22885.1	0.892945	0.000102491	0.00280904	301.885	475.095	507.941	570.072	833.09	832.78	895.715	891.457
CL.34312	CL.34312.1	-1.66263	0.000103234	0.00282695	72.6462	111.033	112.876	66.4564	20.9363	32.0825	40.086	22.9926
CL.6671	CL.6671.1	10.0267	0.000103286	0.00282695	0	0	0	0	401.279	51.1955	380.126	0
CL.2781	CL.2781.1	0.635717	0.000103557	0.00283246	547.268	481.501	446.865	549.304	768.537	932.441	685.609	751.53
CL.6529	CL.6529.1	-10.0572	0.000103696	0.00283432	41.9734	451.607	178.591	0	0	0	0	0
CL.370	CL.370.2	-10.0425	0.000104251	0.00284752	374.532	240.217	0	50.8807	0	0	0	0
CL.27625	CL.27625.1	1.00177	0.000104365	0.00284871	340.63	355.521	405.889	503.615	559.174	982.954	899.862	776.494
CL.46	CL.46.1	-1.85124	0.000105706	0.00288335	440.72	577.587	310.022	153.681	102.064	105.804	129.934	73.5764
CL.19742	CL.19742.1	9.66943	0.000106085	0.00289173	0	0	0	0	0	153.587	190.754	305.473
CL.26765	CL.26765.1	0.555171	0.000106585	0.00290338	1068.71	1521.37	1432.6	1490.08	2041.29	1985.7	1979.42	2102.84
CL.25152	CL.25152.2	-2.37099	0.000108424	0.00295147	343.859	336.303	432.949	287.632	123.873	15.7	78.7898	53.2115
CL.20439	CL.20439.1	-2.00728	0.000108818	0.00296017	267.984	851.968	578.296	414.314	100.32	213.656	69.1138	141.24
CL.27407	CL.27407.1	-1.17921	0.00010954	0.0029778	326.101	571.182	448.411	729.982	239.023	201.369	230.84	246.35
CL.751	CL.751.7	8.34203	0.000109664	0.00297915	0	0	0	0	150.916	90.1041	1.38228	16.4233
CL.33103	CL.33103.3	1.48023	0.000109766	0.0029799	962.159	276.516	598.397	564.88	1756.03	1969.32	1620.03	1349.34
CL.13751	CL.13751.1	1.0784	0.00010998	0.00298167	413.276	497.515	448.411	694.677	783.367	1324.94	1284.13	947.953
CL.22515	CL.22515.1	0.844352	0.000109959	0.00298167	222.782	318.154	247.399	341.628	462.343	557.007	559.822	453.94
CL.13518	CL.13518.1	-0.612314	0.00011028	0.00298777	616.686	560.505	627.002	735.174	362.896	461.442	428.506	408.612
CL.672	CL.672.1	0.376896	0.000110522	0.0029923	1265.66	1162.65	1361.47	1183.76	1647.86	1486.72	1671.17	1658.1
CL.6345	CL.6345.1	9.72693	0.000110597	0.00299231	0	0	0	0	198.895	0	316.541	160.948
CL.22711	evm.model.group5.1377	0.939598	0.000111165	0.00300566	576.327	300.004	414.394	501.538	870.601	940.632	826.601	793.574
CL.7859	CL.7859.1	9.45668	0.000111794	0.00302061	0	0	0	0	209.363	186.352	0	164.89
CL.8479	evm.model.group12.669	-0.480396	0.000112779	0.00304519	3154.46	3573.36	3315.92	3031.04	1940.97	2481.96	2515.74	2435.25
CL.24814	evm.model.group6.765	-2.05387	0.000113209	0.00305474	1344.76	2152.34	4017.14	2354.01	274.789	307.856	812.779	982.114
CL.11136	CL.11136.2	0.945229	0.000113459	0.00305941	695.789	1147.7	1141.9	740.366	1646.12	1524.94	1895.1	2114.66
CL.26909	CL.26909.1	-2.38587	0.000114025	0.00307054	1717.68	431.322	415.167	295.939	103.809	146.76	161.726	134.671
CL.8553	CL.8553.1	-0.875857	0.000114008	0.00307054	787.808	616.022	599.943	571.11	285.257	449.838	355.245	310.729
CL.6995	CL.6995.1	1.35743	0.000114213	0.00307355	38.7446	67.2606	79.6316	45.6888	167.49	157.682	150.668	122.846
CL.3244	evm.model.group1.2629	2.24655	0.000115307	0.00310091	140.449	82.2075	112.876	62.3029	237.278	308.538	1010.44	331.094
CL.22578	CL.22578.1	6.48334	0.00011581	0.00311234	0	0	0	14.5373	760.686	79.1824	157.58	312.7
CL.12834	CL.12834.1	-1.13709	0.000118512	0.00318261	214.71	311.748	290.694	212.868	81.1282	119.456	131.316	137.299
CL.28099	CL.28099.2	9.53148	0.000118583	0.00318261	0	0	0	0	325.385	113.995	0	151.094
CL.31079	CL.31079.1	9.87421	0.000119242	0.00319573	0	0	0	0	567.897	131.061	0	49.9268
CL.31335	CL.31335.1	-2.08995	0.000119312	0.00319573	98.476	119.574	128.338	116.299	12.2128	15.7	38.7037	42.7006
CL.18608	evm.model.group4.559	1.4331	0.000119167	0.00319573	198.566	197.511	170.86	151.604	343.704	296.251	565.351	733.793
CL.34413	CL.34413.1	9.58942	0.000119542	0.00319975	0	0	0	0	0	234.134	218.4	162.262
CL.3217	CL.3217.1	3.58258	0.000119639	0.00320023	17.758	0	10.0506	9.34544	123.001	112.63	147.904	55.8392
CL.26817	CL.26817.1	1.85994	0.000121686	0.00325281	8.0718	18.1497	13.1431	13.499	61.0642	49.8303	48.3797	35.4743
CL.25104	evm.model.group6.939	1.36892	0.000122158	0.00326324	337.401	140.927	212.609	213.907	674.323	724.246	516.971	415.181
evm.TU.group2.1913	evm.model.group2.1913	9.97403	0.000122322	0.00326544	0	0	0	0	0	613.664	125.787	63.0655
CL.13406	CL.13406.1	7.48555	0.000124479	0.00332081	0	0	0	0	40.1279	19.113	80.172	3.94159
CL.26267	CL.26267.1	0.729866	0.000125438	0.00334195	9256.74	13866.4	9057.13	12599.7	20503.6	18812	15185.7	19764.5
CL.4711	CL.4711.2	-2.85786	0.000125361	0.00334195	80.718	766.558	371.099	503.615	101.192	71.6737	24.881	39.4159
CL.24825	CL.24825.1	1.47554	0.000125835	0.0033503	130.763	92.8837	133.75	250.25	486.769	321.508	475.503	407.955
CL.14560	CL.14560.1	9.85687	0.000126502	0.00336584	0	0	0	0	0	373.386	320.688	45.9852
CL.5423	evm.model.group10.597	1.1131	0.000126654	0.00336764	2121.27	918.161	1390.85	1396.62	2618.78	3624.64	3697.59	2657.29
CL.6353	CL.6353.2	-1.59469	0.000127555	0.00338934	130.763	182.565	346.359	154.719	75.0217	62.1172	66.3493	67.0071
CL.17083	CL.17083.2	-1.3265	0.000129142	0.00342924	707.09	728.123	545.051	614.722	230.299	227.991	158.962	414.524
CL.23842	CL.23842.2	-9.97155	0.000130762	0.00346995	0	456.945	151.532	24.9212	0	0	0	0
CL.4698	CL.4698.1	9.42512	0.000131958	0.00349938	0	0	0	0	213.725	114.678	0	220.072
CL.28684	evm.model.group7.1783	-0.430193	0.000132525	0.00351207	5359.68	6258.44	5401.81	5453.58	4306.77	3960.48	4714.94	3705.75
CL.11751	CL.11751.1	9.73371	0.000132667	0.00351354	0	0	0	0	164.001	0	396.713	118.905
CL.1039	CL.1039.5	-9.82576	0.000133876	0.0035432	387.446	114.236	71.1273	0	0	0	0	0
CL.33146	evm.model.utg1338_2327123_2484087__.3	-0.896044	0.000134224	0.00355006	824.938	567.979	864.351	646.912	369.002	341.986	353.863	494.013
CL.25744	CL.25744.1	-9.43824	0.000135369	0.00357798	0	169.753	151.532	116.299	0	0	0	0
CL.22345	evm.model.group5.964	1.24233	0.000136837	0.00361442	145.292	145.198	147.666	125.644	328.874	206.83	485.179	315.984
CL.14219	CL.14219.1	0.664466	0.000137431	0.00362718	376.146	285.057	354.09	276.21	498.982	464.855	541.852	539.341
CL.5946	CL.5946.4	-1.74978	0.000137501	0.00362718	184.037	276.516	109.01	134.99	42.7449	51.8781	38.7037	74.8903
CL.10847	CL.10847.1	10.1208	0.000139194	0.00366219	0	0	0	0	293.981	23.8912	570.88	0
CL.16539	CL.16539.1	9.6363	0.000139191	0.00366219	0	0	0	0	296.598	176.795	161.726	0
CL.32643	CL.32643.1	9.55836	0.000138935	0.00366219	0	0	0	0	386.449	96.2476	0	118.905
CL.4090	evm.model.group1.3133	-0.31486	0.000139112	0.00366219	14574.4	17413	17574.6	16476	13195.1	13287.6	12752.9	13860
CL.33749	CL.33749.1	9.92519	0.000139448	0.00366646	0	0	0	0	491.131	48.4651	236.369	0
CL.3480	CL.3480.1	1.50752	0.000140208	0.00368401	51.6595	148.4	112.876	97.6079	282.64	216.386	335.893	338.32
CL.15346	evm.model.group3.854	0.45818	0.000140434	0.00368755	1325.39	1313.18	1367.65	1221.14	1759.52	1528.36	1964.21	1934.01
CL.31967	CL.31967.1	10.3737	0.000140956	0.00369883	0	0	0	0	701.366	0	348.334	9.19705
CL.24029	evm.model.group6.334	-1.93414	0.000141259	0.00370436	715.162	603.211	438.36	212.868	168.363	126.282	158.962	62.4086
CL.2523	CL.2523.1	-10.1715	0.00014225	0.00372791	437.492	0	276.778	13.499	0	0	0	0
CL.12887	CL.12887.2	-4.66502	0.000143202	0.00375038	690.946	533.815	1321.27	711.292	4.36173	15.0174	0	108.394
CL.22913	evm.model.group5.1641	0.902551	0.0001433	0.00375051	34437.5	18515.9	21890.2	22027.2	41898.8	47406.4	35875.6	55894.4
CL.28981	evm.model.group7.1897	-1.69384	0.000144046	0.00376758	1619.2	1504.29	1384.66	793.324	445.769	252.565	709.108	233.868
CL.30811	evm.model.group8.1342	0.879158	0.000144761	0.0037838	58.117	75.8017	71.1273	67.4948	130.852	118.091	114.729	139.27
CL.20351	evm.model.group4.1738	-1.58074	0.000146915	0.00383761	5303.17	3163.39	6413.82	5648.8	925.559	1035.51	2721.7	2182.33
CL.29465	CL.29465.1	1.71965	0.000147931	0.00386162	40.359	35.2318	60.3035	56.0726	205.001	191.13	160.344	78.8319
CL.80	CL.80.1	-1.26669	0.000148858	0.0038833	1057.41	1000.37	939.344	1186.87	327.13	343.351	735.371	337.006
CL.17237	CL.17237.2	-1.58324	0.000149008	0.00388469	4633.21	5097.93	10445.7	5181.53	1227.39	1359.07	3042.39	2835.98
CL.32858	CL.32858.1	9.6319	0.000149483	0.00389452	0	0	0	0	215.469	0	305.483	112.335
CL.21715	CL.21715.1	9.66841	0.000149588	0.00389473	0	0	0	0	284.385	95.565	269.544	0
CL.3334	evm.model.group1.2703	-2.8987	0.000150031	0.00390374	35.5159	124.913	37.883	65.4181	7.85111	8.87389	2.76455	15.1094
CL.23554	CL.23554.1	9.69784	0.000150804	0.0039213	0	0	0	0	331.491	85.3259	246.045	0
CL.22669	CL.22669.1	-1.32747	0.00015134	0.00393268	519.824	649.119	591.439	301.131	208.491	227.308	134.081	249.634
CL.22948	CL.22948.1	-9.73299	0.000152806	0.00396551	0	41.6375	121.38	373.817	0	0	0	0
CL.8423	CL.8423.1	9.8878	0.0001529	0.00396551	0	0	0	0	593.195	31.3999	0	131.386
CL.23272	evm.model.group5.1799	1.66629	0.000152756	0.00396551	38.7446	49.1109	71.1273	61.2645	101.192	146.76	194.901	260.145
CL.29713	CL.29713.1	-7.68291	0.000153389	0.00397563	12.9149	3.20289	44.8411	68.5332	0	0	0	0
CL.17126	evm.model.group3.2338	9.80337	0.000153977	0.00398827	0	0	0	0	167.49	73.0389	472.739	0
CL.2501	evm.model.group1.2095	0.836513	0.000154869	0.00400879	2226.2	2986.16	3584.2	2150.49	4729.86	4068.34	5873.29	4886.92
CL.12336	CL.12336.1	10.1503	0.000155676	0.00402707	0	0	0	0	547.833	16.3826	342.805	0
CL.10692	CL.10692.1	0.631166	0.00015586	0.00402923	1092.92	1087.91	1249.37	1261.63	1643.5	1537.23	2266.93	1828.24
CL.26225	CL.26225.1	1.1006	0.00015663	0.00404653	88.7898	87.5456	113.649	70.61	178.831	189.082	250.192	159.635
CL.22487	evm.model.group5.1087	-1.8118	0.000159029	0.00410587	61.3457	147.333	141.481	96.5695	28.7874	41.639	37.3215	20.3649
CL.34024	CL.34024.1	-0.922684	0.000159653	0.00411931	1854.9	1181.87	1272.56	1796.4	974.41	763.837	616.495	862.552
evm.TU.group1.1769	evm.model.group1.1769	-9.37646	0.000160479	0.00413796	0	160.144	101.279	157.834	0	0	0	0
CL.25072	CL.25072.1	-0.749346	0.000161134	0.00415219	314.8	348.047	276.778	317.745	150.916	182.939	219.782	195.766
CL.14377	CL.14377.1	9.58651	0.000162177	0.00417637	0	0	0	0	0	87.3737	346.951	179.342
CL.27463	evm.model.group7.928	-9.53585	0.000163807	0.00421562	142.064	218.864	107.464	0	0	0	0	0
CL.12764	CL.12764.2	1.53474	0.000163964	0.00421618	542.425	191.106	200.239	309.438	1152.37	731.755	866.687	842.187
CL.21856	evm.model.group5.714	-1.36158	0.000164039	0.00421618	755.521	604.278	582.934	288.67	174.469	254.612	187.99	249.634
CL.25938	evm.model.group6.1506	-1.29851	0.000165977	0.00426326	322.872	383.279	415.167	411.199	191.044	98.2954	114.729	218.101
CL.16560	CL.16560.2	0.823689	0.000167473	0.00429773	598.928	1021.72	1052.22	815.13	1419.31	1499.69	1718.17	1546.42
CL.1171	evm.model.group1.927	-0.675388	0.000167533	0.00429773	669.96	876.524	812.552	655.219	396.045	515.368	467.209	509.122
CL.6483	CL.6483.1	-0.565835	0.000169822	0.00435366	2258.49	2094.69	2137.68	2295.86	1766.5	1606.86	1318.69	1241.6
CL.25006	CL.25006.1	-0.328289	0.000170775	0.0043725	6481.66	7155.25	6937.23	6310.25	4841.52	5378.94	5401.94	5791.51
CL.20785	evm.model.group5.122	0.735019	0.0001707	0.0043725	731.305	719.582	591.439	691.562	892.41	1436.2	1144.52	1072.77
CL.26073	CL.26073.6	-9.50591	0.000171247	0.00438177	0	249.825	54.1186	154.719	0	0	0	0
CL.14478	evm.model.group3.44	9.5247	0.000171923	0.00439627	0	0	0	0	152.661	238.912	196.283	0
CL.12234	CL.12234.1	-0.72662	0.000172509	0.00440845	1097.77	1516.03	1699.32	1439.2	765.047	786.363	917.832	1010.36
CL.33253	evm.model.utg166_5260943_5383503__.2	0.352011	0.000173235	0.00442417	666.731	668.336	688.079	738.29	847.048	903.089	937.183	844.158
CL.24151	CL.24151.1	1.0734	0.000174909	0.00446409	66.1888	51.2462	76.5391	77.8786	117.767	156.317	132.699	165.547
CL.33845	CL.33845.1	1.09552	0.000175466	0.00447544	62.9601	51.2462	48.7067	67.4948	127.362	143.347	93.9948	123.503
CL.7488	CL.7488.1	9.40411	0.000175697	0.00447563	0	0	0	0	170.107	294.886	0	75.5472
CL.16249	evm.model.group3.1673	9.74269	0.000175619	0.00447563	0	0	0	0	471.939	87.3737	124.405	0
CL.10639	CL.10639.1	1.26238	0.000176468	0.00449243	272.827	113.169	204.104	163.026	440.535	369.973	547.381	445.4
CL.20267	CL.20267.5	1.25545	0.000176867	0.00449973	166.279	141.995	197.146	290.747	636.812	365.195	467.209	434.232
CL.4991	evm.model.group10.361	-9.58319	0.000178019	0.00452617	111.391	282.922	89.6822	0	0	0	0	0
CL.19741	evm.model.group4.1345	1.80187	0.000179191	0.00455306	133.992	150.536	275.232	120.452	906.367	270.312	532.176	667.443
CL.16775	CL.16775.2	0.656555	0.000179331	0.00455373	5374.21	5353.09	5024.52	4811.86	6603.66	6821.29	10470.7	8523.04
CL.16360	CL.16360.1	8.02892	0.000179929	0.00456603	0	0	0	0	81.1282	4.77825	118.876	3.94159
CL.13793	CL.13793.5	1.88838	0.000181061	0.00459185	271.213	48.0433	147.666	157.834	566.152	606.155	627.553	507.152
CL.23425	CL.23425.2	1.45565	0.000182758	0.00463196	87.1755	264.772	177.818	236.751	647.281	511.273	452.004	496.641
CL.22318	evm.model.group5.956	-1.10499	0.000183149	0.00463893	2461.9	2156.61	1672.26	2099.61	1194.24	933.806	547.381	1221.24
CL.17090	CL.17090.1	9.73623	0.000183344	0.00464092	0	0	0	0	425.705	57.339	197.666	0
CL.17709	CL.17709.1	9.73952	0.000185159	0.00468392	0	0	0	0	268.682	0	367.686	45.9852
CL.11032	CL.11032.3	5.72995	0.000185522	0.00469013	8.0718	0	0	0	68.043	118.774	110.582	88.6858
CL.24275	CL.24275.1	9.38194	0.000185984	0.00469885	0	0	0	0	313.172	133.108	0	86.0581
CL.7779	CL.7779.3	-0.74843	0.000186338	0.00470482	321.258	261.569	262.862	257.519	150.916	150.174	154.815	197.737
CL.24400	CL.24400.1	-2.25188	0.000187124	0.00472171	290.585	393.955	101.279	104.877	36.6385	45.7347	67.7315	37.4451
CL.27475	CL.27475.1	-1.05166	0.000187719	0.00473373	552.111	863.712	726.735	896.124	243.384	367.242	427.123	429.634
CL.162	CL.162.1	-9.80216	0.000187875	0.00473469	416.505	101.425	45.6142	0	0	0	0	0
CL.8564	CL.8564.1	9.85029	0.000188034	0.00473555	0	0	0	0	534.748	45.7347	156.197	0
CL.31447	evm.model.group9.85	-0.67231	0.000188146	0.00473555	595.699	886.132	769.257	653.142	466.705	417.073	458.916	482.188
CL.20342	CL.20342.4	7.77608	0.000189024	0.00475468	0	0	0	0	7.85111	107.852	55.2911	3.94159
CL.3939	CL.3939.2	9.61019	0.000189463	0.00476272	0	0	0	0	373.364	95.565	154.815	0
CL.2034	evm.model.group1.1808	0.797222	0.000190183	0.00477782	624.757	512.462	436.041	400.815	696.132	965.889	905.391	855.983
CL.29964	evm.model.group8.687	-2.1949	0.000190485	0.00478241	10546.6	9024.67	12570.2	5111.95	718.813	772.028	4112.27	2535.1
CL.4091	CL.4091.7	-9.76159	0.000190672	0.00478411	319.643	0	30.9249	197.293	0	0	0	0
CL.18881	evm.model.group4.846	-1.15579	0.000192381	0.00482397	690.946	1106.06	1022.07	736.213	290.491	340.621	581.938	386.276
CL.9262	CL.9262.1	0.687784	0.000192898	0.0048339	1157.5	1112.47	1054.54	758.019	1607.73	1540.64	1908.92	1518.83
CL.19270	CL.19270.1	9.69182	0.000193285	0.00484057	0	0	0	0	478.918	149.491	0	31.5327
CL.14010	CL.14010.1	9.9309	0.000193517	0.00484336	0	0	0	0	388.194	21.8434	369.068	0
CL.27428	CL.27428.2	-3.01286	0.000194417	0.00486286	98.476	79.0046	77.3122	56.0726	24.4257	2.73043	6.91138	4.59852
CL.13370	CL.13370.1	-9.52479	0.000194898	0.00487184	256.683	82.2075	126.019	0	0	0	0	0
CL.27337	CL.27337.1	9.84652	0.000196207	0.00490151	0	0	0	0	561.791	19.7956	0	153.065
CL.5253	CL.5253.1	9.5475	0.000196976	0.00491765	0	0	0	0	281.768	34.1303	0	281.167
CL.13215	CL.13215.1	-9.42163	0.000197986	0.00493477	145.292	167.618	119.834	0	0	0	0	0
CL.12506	evm.model.group2.1265	-0.708355	0.000198031	0.00493477	6786.77	9602.26	11065.7	10472.1	5255.88	5371.43	5659.04	6928.01
CL.21877	evm.model.group5.724	-0.855978	0.000197814	0.00493477	234.082	220.999	196.373	246.097	144.809	133.108	92.6125	122.189
CL.16291	CL.16291.1	7.64949	0.000198441	0.00494191	0	0	0	0	6.10642	6.14346	102.288	45.9852
CL.28562	evm.model.group7.1727	-1.42322	0.000200394	0.00498745	309.957	392.888	662.566	704.023	243.384	133.791	212.871	183.284
CL.17194	CL.17194.2	1.34689	0.000202425	0.00503487	79.1037	99.2895	44.068	86.1857	218.959	231.404	161.726	169.488
CL.20738	CL.20738.4	-0.87888	0.000205078	0.00509769	602.156	481.501	586.027	472.464	247.746	232.769	306.865	377.079
CL.24448	CL.24448.1	9.4821	0.000206176	0.00512181	0	0	0	0	251.236	0	218.4	101.168
CL.7952	evm.model.group12.130	0.620854	0.000206623	0.00512973	1046.11	1253.4	1438.78	1230.48	1640.88	1750.89	2257.26	2002.99
CL.6872	evm.model.group11.423	0.430262	0.000207295	0.00514322	8364	9106.88	9734.38	10922.7	13692.3	11387.2	13135.8	13171.5
CL.10760	evm.model.group2.43	-1.2827	0.000208081	0.00515953	690.946	1481.87	1272.56	1456.85	337.598	525.607	463.063	688.465
CL.6406	CL.6406.1	10.0596	0.000208424	0.00516485	0	0	0	0	700.494	127.647	23.4987	0
CL.27453	CL.27453.1	-0.989206	0.000215166	0.00532862	658.659	749.476	466.966	747.635	416.109	305.808	246.045	350.802
CL.1132	CL.1132.3	1.56181	0.000215314	0.00532899	124.306	288.26	281.417	238.828	658.621	419.803	1090.62	592.553
CL.17485	CL.17485.1	9.75456	0.000215999	0.00534263	0	0	0	0	0	36.8608	511.442	141.24
CL.30961	CL.30961.1	-1.41089	0.000220707	0.00545574	201.795	317.086	168.541	319.822	59.3195	113.313	103.671	102.481
CL.12716	CL.12716.1	0.602629	0.000221439	0.00547045	271.213	320.289	299.971	328.129	472.811	411.612	541.852	433.575
CL.28861	CL.28861.5	-2.54143	0.000221708	0.00547372	665.116	88.6132	213.382	261.672	70.66	67.5781	44.2328	28.2481
CL.11148	CL.11148.1	0.868439	0.000222988	0.00550192	222.782	171.888	155.398	186.909	254.725	378.164	341.422	365.254
CL.20738	evm.model.group5.93	-0.994678	0.000223339	0.00550721	8724	16027.3	18163.7	13263.3	5931.08	5996.7	6933.5	9333.03
CL.19631	CL.19631.1	9.78425	0.000223587	0.00550993	0	0	0	0	398.662	28.6695	276.455	0
CL.11283	CL.11283.1	9.43586	0.000224622	0.00553201	0	0	0	0	102.937	0	208.724	241.094
CL.7837	CL.7837.1	5.36389	0.000225037	0.00553883	0	3.20289	0	4.15353	212.852	22.526	16.5873	54.5254
CL.4996	CL.4996.1	-1.90076	0.000225237	0.00554036	915.342	302.139	344.813	221.175	114.277	130.378	132.699	99.8537
CL.31749	CL.31749.3	-9.47976	0.000225445	0.00554207	267.984	0	81.951	100.723	0	0	0	0
CL.1923	evm.model.group1.1693	1.1918	0.000226466	0.00556376	2841.27	1372.97	1231.58	1667.64	4267.52	5045.83	2887.58	4037.5
CL.1408	CL.1408.1	-1.37659	0.000230154	0.00564654	3998.77	8074.48	6298.63	8022.54	1740.33	2736.57	1607.59	4078.89
CL.27499	CL.27499.1	9.39203	0.000229987	0.00564654	0	0	0	0	347.194	131.743	0	57.1531
CL.8240	CL.8240.1	1.20598	0.000230258	0.00564654	887.898	643.78	645.557	393.547	1072.99	1914.71	1217.79	1718.53
CL.21355	CL.21355.2	5.09149	0.000230978	0.00566073	0	5.33815	29.3787	0	105.554	244.373	467.209	388.247
CL.32138	CL.32138.1	-0.704808	0.000233526	0.00571968	447.178	468.689	381.149	364.472	266.065	276.456	270.926	206.277
CL.11038	CL.11038.1	0.914014	0.000236325	0.00578117	5054.56	4417.85	4306.29	2729.91	6094.21	6693.64	9801.72	8515.81
CL.4742	evm.model.group1.3544	-9.49072	0.000236292	0.00578117	119.463	233.811	0	100.723	0	0	0	0
CL.23700	CL.23700.4	-9.23656	0.000239225	0.00584853	0	106.763	88.9091	184.832	0	0	0	0
CL.18800	evm.model.group4.748	-0.51058	0.000240945	0.00588698	824.938	965.137	905.326	889.893	629.834	679.876	521.118	681.239
CL.23914	CL.23914.4	-9.2413	0.000241534	0.00589779	0	180.429	124.473	76.8403	0	0	0	0
CL.23671	evm.model.group6.127	0.842224	0.000242556	0.00591914	188.88	230.608	174.726	155.757	300.959	357.003	399.478	288.393
CL.28634	CL.28634.2	-1.11536	0.00024389	0.00594806	602.156	454.81	483.975	328.129	191.044	159.73	230.84	280.51
CL.9048	CL.9048.3	-9.46012	0.000244095	0.00594945	185.651	87.5456	0	171.333	0	0	0	0
CL.34804	CL.34804.1	-1.27058	0.000245111	0.00597058	348.702	634.172	497.118	625.106	142.192	226.625	197.666	305.473
CL.12923	CL.12923.4	1.65066	0.00024847	0.00604768	17.758	42.7052	31.698	18.6909	98.5751	91.4693	93.9948	67.664
CL.7191	CL.7191.1	9.93464	0.000248578	0.00604768	0	0	0	0	672.579	64.165	44.2328	0
CL.27386	CL.27386.1	5.90213	0.000248807	0.00604957	0	18.1497	0	0	270.427	255.978	341.422	222.043
CL.3036	CL.3036.1	9.44251	0.000249055	0.00605194	0	0	0	0	310.555	103.756	140.992	0
CL.14376	CL.14376.1	9.24411	0.000250116	0.00607403	0	0	0	0	273.044	137.204	0	73.5764
CL.10936	CL.10936.1	-9.1931	0.000250727	0.00608518	0	159.077	89.6822	120.452	0	0	0	0
CL.26814	CL.26814.1	0.996199	0.000251259	0.00609439	96.8616	100.357	134.523	139.143	275.661	270.312	194.901	201.021
CL.15415	CL.15415.1	5.92407	0.000255009	0.00618162	0	2.13526	0	0	54.9578	18.4304	53.9088	9.19705
CL.3507	CL.3507.1	9.48607	0.000255885	0.0061991	0	0	0	0	430.066	94.1997	0	47.956
CL.11683	CL.11683.2	-1.25899	0.000257013	0.00622266	695.789	306.41	441.453	310.476	177.959	170.652	196.283	187.226
CL.23744	CL.23744.1	9.47402	0.00025717	0.00622271	0	0	0	0	191.044	0	309.63	67.0071
CL.18506	CL.18506.1	9.4237	0.000258396	0.00624861	0	0	0	0	374.236	131.061	0	42.7006
CL.28301	CL.28301.1	9.92193	0.00025963	0.00627465	0	0	0	0	662.11	0	33.1746	78.8319
CL.33204	CL.33204.1	-1.08091	0.000260325	0.00628766	363.231	425.984	366.46	339.551	139.575	126.282	193.519	247.663
CL.20098	CL.20098.1	0.692657	0.000263079	0.00635035	912.114	992.895	876.721	863.934	1106.13	1355.66	1690.52	1740.87
CL.32605	CL.32605.1	-3.09118	0.000263354	0.00635315	650.587	3311.79	4962.67	1946.97	89.8516	344.034	67.7315	773.209
CL.33824	CL.33824.1	-0.838381	0.000265766	0.00640748	10598.3	9776.28	7854.15	8763.94	3700.49	4249.23	6777.3	5963.63
CL.5630	CL.5630.1	-6.57038	0.00026688	0.00643047	448.792	260.502	108.237	13.499	8.72346	0	0	0
CL.17507	CL.17507.1	0.766538	0.000267275	0.00643612	558.569	468.689	664.885	566.957	717.068	974.08	1043.62	1110.87
CL.6294	CL.6294.1	-1.11237	0.000267478	0.00643713	1170.41	1525.64	1091.65	1665.56	577.493	917.424	407.772	616.859
CL.19049	CL.19049.1	0.587543	0.000268245	0.00645173	10759.7	9949.24	8964.35	8176.22	14767.1	11007.7	16438	14662.1
CL.7215	CL.7215.1	0.872534	0.000268423	0.00645214	637.672	857.306	797.089	526.46	1176.79	1084.66	1660.11	1244.89
CL.15551	CL.15551.1	9.62268	0.000269219	0.00646351	0	0	0	0	266.065	0	330.364	32.8466
CL.26889	CL.26889.6	-9.5947	0.000269079	0.00646351	332.558	67.2606	0	88.2625	0	0	0	0
CL.10554	CL.10554.1	9.50416	0.000270212	0.00648347	0	0	0	0	331.491	57.339	190.754	0
CL.29550	CL.29550.1	-9.83167	0.000270813	0.006494	0	436.66	126.792	11.4222	0	0	0	0
CL.33611	CL.33611.1	9.65401	0.000271676	0.0065108	0	0	0	0	460.599	0	140.992	41.3867
CL.4664	CL.4664.1	0.724496	0.000272008	0.00651485	175.965	122.777	135.296	142.258	250.363	251.199	226.693	218.101
CL.3980	CL.3980.1	-9.74777	0.000272513	0.00652057	434.263	73.6664	34.7905	0	0	0	0	0
CL.28571	evm.model.group7.1732	0.49398	0.000272572	0.00652057	2192.3	2808.93	2856.69	2610.49	3404.77	3427.37	3678.24	4240.5
CL.2773	evm.model.group1.2255	0.769582	0.000272752	0.00652098	137.221	172.956	189.415	194.177	283.512	276.456	273.691	352.773
CL.4782	evm.model.group10.68	1.41361	0.000273033	0.00652382	192.109	287.192	281.417	160.949	593.195	980.906	428.506	453.94
CL.21654	CL.21654.3	0.316778	0.000275784	0.00658561	1811.31	1502.15	1608.09	1682.18	1969.76	2090.82	2081.71	2073.28
CL.34193	CL.34193.1	9.40762	0.000276593	0.00660101	0	0	0	0	217.214	0	70.4961	254.233
CL.5159	evm.model.group10.455	-0.712135	0.000276822	0.00660218	18910.6	23650.1	17731.6	21361.6	16380.9	11813.9	9421.6	12223.5
CL.31713	evm.model.group9.192	1.4512	0.000276972	0.00660218	269.598	206.052	201.012	217.022	784.239	705.133	696.667	256.204
CL.25499	evm.model.group6.1119	1.19919	0.000279611	0.00666112	171.122	129.183	150.759	161.988	340.215	420.486	199.048	443.429
CL.17600	evm.model.group3.2632	0.904833	0.000281425	0.00669637	240.54	325.627	320.846	373.817	531.259	788.411	528.03	515.692
CL.22175	evm.model.group5.865	-1.76162	0.000281357	0.00669637	2507.1	958.731	746.063	701.946	451.875	400.008	264.015	331.751
CL.21275	evm.model.group5.371	-0.604803	0.000282219	0.00671128	4810.79	7314.33	6946.5	6884.47	4194.24	4552.99	3737.68	4583.42
CL.30537	CL.30537.7	-9.1193	0.000283102	0.0067283	0	135.589	108.237	106.953	0	0	0	0
CL.11257	CL.11257.1	-1.34515	0.000283822	0.00674139	221.167	167.618	183.23	100.723	63.6812	70.3085	81.5543	49.9268
CL.30869	CL.30869.1	-4.88356	0.000285004	0.00676546	59.7313	25.6231	115.968	126.683	0	0	6.91138	4.59852
CL.2738	CL.2738.3	-2.68126	0.000285765	0.00677953	62.9601	449.472	347.132	451.696	93.341	35.4956	20.7341	54.5254
CL.13032	CL.13032.1	9.60158	0.000287417	0.00681064	0	0	0	0	362.023	34.1303	223.929	0
CL.24300	CL.24300.4	-9.11243	0.000287295	0.00681064	0	99.2895	131.431	118.376	0	0	0	0
CL.27838	CL.27838.1	9.07472	0.000287995	0.00682031	0	0	0	0	188.427	105.121	0	136.642
CL.25054	CL.25054.1	-0.706667	0.000290585	0.00687757	29198.9	31399	34493.6	35748.4	18266	14153.9	24194	23560.9
CL.26149	CL.26149.1	9.8043	0.00029142	0.00689328	0	0	0	0	539.11	164.508	0	9.85398
CL.12501	CL.12501.1	9.22871	0.000293808	0.00694566	0	0	0	0	277.406	146.76	0	54.5254
CL.29450	CL.29450.2	-1.14259	0.000295817	0.00698904	637.672	574.385	567.472	697.793	280.895	308.538	152.05	377.079
CL.17057	CL.17057.3	-9.30502	0.000296237	0.00699483	182.423	0	67.2616	149.527	0	0	0	0
CL.20741	CL.20741.1	-9.39448	0.000299354	0.00706426	226.01	92.8837	0	105.915	0	0	0	0
CL.7985	CL.7985.1	-0.746378	0.000300835	0.00709503	5627.66	7412.55	5884.23	7029.85	3607.15	5208.29	3007.83	3644.66
CL.3034	CL.3034.1	1.36162	0.000302025	0.00711718	229.239	125.98	127.565	130.836	238.15	389.769	409.154	533.429
CL.3492	CL.3492.1	1.63089	0.000302129	0.00711718	129.149	89.6809	97.4134	35.305	256.47	257.343	346.951	225.328
CL.726	CL.726.1	9.39872	0.000303392	0.00714273	0	0	0	0	281.768	64.8477	192.136	0
CL.32924	CL.32924.1	9.14845	0.000305101	0.00717873	0	0	0	0	262.576	79.1824	0	111.022
CL.13127	CL.13127.5	-1.49358	0.000306461	0.0072065	132.378	179.362	278.324	344.743	63.6812	100.343	78.7898	89.3428
CL.17977	evm.model.group4.159	-0.483981	0.000307943	0.00723712	11613.7	15758.2	15185.7	13392	9807.78	9188.57	9635.85	11374.8
CL.915	CL.915.1	9.55559	0.000308863	0.00725447	0	0	0	0	371.619	36.8608	192.136	0
CL.34713	CL.34713.1	9.72025	0.000309534	0.00726599	0	0	0	0	271.3	0	384.273	17.7372
CL.28419	CL.28419.1	-3.22815	0.000310207	0.00727751	7582.65	4131.73	3627.49	869.126	281.768	194.543	1202.58	52.5546
CL.3787	evm.model.group1.2924	-1.49062	0.000311978	0.00731477	9182.48	19238.7	28786.4	19578.7	3684.79	5893.63	7237.6	10509.6
CL.19834	CL.19834.1	3.53752	0.000312898	0.00733206	0	19.2173	10.0506	9.34544	35.7662	119.456	205.959	93.9413
CL.34406	CL.34406.1	1.17655	0.000313674	0.00734595	607	1046.28	903.78	423.66	1387.9	1606.17	2059.59	1688.32
CL.20512	CL.20512.1	1.78587	0.00031651	0.00740804	222.782	190.038	349.451	235.713	546.088	385.673	953.771	1558.24
CL.28951	CL.28951.1	9.07049	0.000317353	0.00742342	0	0	0	0	221.576	98.978	0	108.394
CL.13495	CL.13495.1	9.9578	0.000320211	0.00748156	0	0	0	0	693.515	0	17.9696	82.1165
CL.15445	CL.15445.1	9.84915	0.000320048	0.00748156	0	0	0	0	442.279	0	283.367	10.5109
CL.14371	CL.14371.1	-0.873413	0.000322231	0.00752436	870.14	689.688	803.274	1219.06	522.535	413.66	454.769	563.648
CL.14872	CL.14872.1	1.54423	0.000324942	0.00758316	258.298	95.019	202.558	125.644	575.748	427.312	655.199	327.152
CL.22227	CL.22227.3	-1.71206	0.000325128	0.00758316	322.872	434.525	569.791	317.745	156.15	70.3085	204.577	73.5764
CL.20718	CL.20718.1	9.27837	0.000325525	0.00758801	0	0	0	0	0	176.795	257.103	61.7516
CL.29714	CL.29714.1	9.35431	0.000325883	0.00759195	0	0	0	0	322.768	0	103.671	95.9121
CL.12223	CL.12223.1	-0.776207	0.000326202	0.00759496	4989.99	5127.82	5357.74	3890.82	2094.5	2748.86	2691.29	3771.45
CL.15740	CL.15740.1	1.36719	0.000327393	0.00761826	54.8883	60.8549	123.7	83.0705	155.278	235.499	215.635	231.24
CL.6981	CL.6981.1	9.14738	0.000327811	0.00762356	0	0	0	0	203.257	197.273	0	51.8976
CL.20251	CL.20251.3	-1.1373	0.000328679	0.00763881	235.697	358.723	259.769	435.082	123.873	190.447	134.081	137.299
CL.21353	CL.21353.1	9.235	0.000328848	0.00763881	0	0	0	0	170.107	0	201.812	109.051
CL.17350	CL.17350.4	0.883367	0.000329969	0.00765597	926.643	621.36	558.194	603.3	1182.9	1597.3	1046.38	1161.46
CL.18351	CL.18351.1	-9.16833	0.000329892	0.00765597	0	52.3138	126.792	183.794	0	0	0	0
CL.26316	CL.26316.1	-1.88341	0.000334844	0.00776228	174.351	500.718	418.259	333.321	68.043	56.6564	174.167	89.9997
CL.15580	evm.model.group3.1036	-9.29883	0.000334938	0.00776228	163.05	144.13	0	90.3392	0	0	0	0
CL.34375	CL.34375.1	0.429051	0.000338869	0.00784883	540.811	513.53	480.882	532.69	632.451	673.733	703.579	769.268
CL.20342	CL.20342.5	1.78817	0.000340138	0.00787368	129.149	68.3283	34.7905	111.107	292.236	290.108	396.713	201.678
CL.9419	evm.model.group13.213	-1.39605	0.00034138	0.00789785	246.997	702.5	696.583	732.059	242.512	229.356	199.048	233.211
CL.20267	CL.20267.4	0.772965	0.000342199	0.00791225	544.039	715.312	605.355	395.623	997.964	1002.07	952.388	911.165
CL.7441	CL.7441.1	9.65909	0.000343224	0.00793135	0	0	0	0	497.237	0	29.0278	118.905
CL.318	CL.318.1	9.27009	0.000344244	0.00795036	0	0	0	0	0	107.169	306.865	78.8319
CL.23028	CL.23028.1	9.15981	0.000344539	0.00795258	0	0	0	0	0	97.6128	217.017	141.897
CL.16558	CL.16558.1	1.04778	0.000345075	0.00796038	88.7898	65.1254	102.052	105.915	209.363	181.573	215.635	144.525
CL.19707	evm.model.group4.1328	0.951819	0.000350205	0.00807407	174.351	175.091	155.398	136.028	266.065	427.312	275.073	268.028
CL.22071	evm.model.group5.829	-0.864326	0.000350639	0.00807942	3294.91	2307.15	1795.19	1940.74	1540.56	1245.76	1179.08	1160.8
CL.10664	evm.model.group2.21	-9.04646	0.000352375	0.00811475	0	82.2075	105.918	145.373	0	0	0	0
CL.1702	CL.1702.1	2.08043	0.00035402	0.00814327	38.7446	8.54103	23.1937	21.806	107.299	116.726	106.435	55.8392
CL.28277	CL.28277.3	0.965511	0.000353963	0.00814327	443.949	746.273	943.982	690.524	1302.41	1169.31	1401.63	1650.87
CL.10574	evm.model.group16.372	-9.03054	0.000354515	0.00814999	0	97.1543	93.5478	139.143	0	0	0	0
CL.34000	evm.model.utg548_230440_521065__.6	-9.36636	0.000355327	0.00816397	54.8883	159.077	0	202.484	0	0	0	0
CL.15762	CL.15762.1	9.51294	0.000355607	0.00816572	0	0	0	0	382.96	0	33.1746	166.861
CL.12506	CL.12506.1	-0.902845	0.000356374	0.00817396	979.917	1500.02	1397.81	1475.54	674.323	583.629	620.642	984.084
CL.6191	evm.model.group10.1348	-0.689605	0.00035626	0.00817396	1270.5	762.287	1036.76	1118.34	656.876	645.746	678.698	614.232
CL.27581	CL.27581.1	9.08872	0.000357626	0.00819798	0	0	0	0	260.831	91.4693	0	82.1165
CL.24746	CL.24746.3	9.12361	0.000357856	0.00819857	0	0	0	0	0	184.304	160.344	100.511
CL.20388	CL.20388.1	1.71546	0.000359238	0.00822067	471.393	667.268	635.507	1252.29	3258.21	3523.62	959.3	2198.75
CL.24073	CL.24073.1	0.681285	0.000359146	0.00822067	461.707	466.554	586.027	539.959	721.43	961.11	926.125	691.75
CL.31431	CL.31431.5	-9.31194	0.000359436	0.00822067	109.777	210.323	0	80.9938	0	0	0	0
CL.13050	CL.13050.1	-1.21709	0.000361371	0.00826021	187.266	154.806	189.415	245.058	53.2131	107.169	77.4075	95.2552
CL.12743	CL.12743.1	-1.20113	0.000361947	0.00826866	290.585	240.217	229.617	185.87	91.5963	132.426	63.5847	120.876
CL.5968	CL.5968.6	1.59261	0.000362155	0.00826869	30.6728	62.9901	53.3454	30.1131	148.299	151.539	156.197	82.1165
CL.9076	CL.9076.3	-9.494	0.000365116	0.00833154	343.859	44.8404	66.4885	0	0	0	0	0
CL.16096	CL.16096.1	-1.23215	0.000365472	0.00833235	468.165	493.245	443.772	696.754	156.15	281.917	154.815	299.561
CL.19638	CL.19638.1	9.31019	0.000365567	0.00833235	0	0	0	0	57.5748	0	261.25	187.883
CL.19118	CL.19118.1	1.41839	0.000368601	0.00839054	71.0319	70.4635	41.7486	47.7656	94.2133	163.143	203.195	154.379
CL.26414	CL.26414.2	-0.782056	0.000368748	0.00839054	778.122	724.92	582.934	483.886	383.832	371.338	417.447	321.897
CL.1904	evm.model.group1.1485	-0.881362	0.00036846	0.00839054	7416.37	8173.77	4579.98	6120.22	2902.29	3587.78	4716.33	3067.22
CL.14538	CL.14538.1	9.59294	0.000370684	0.0084298	0	0	0	0	0	216.386	384.273	15.7664
CL.7171	evm.model.group11.626	-1.18974	0.000371308	0.00843921	970.231	783.64	522.631	468.31	266.065	382.26	323.453	230.583
CL.8784	evm.model.group12.941	3.61876	0.000373349	0.00848077	0	4.27052	26.2862	12.4606	118.639	83.9606	237.752	99.8537
CL.1964	evm.model.group1.1770	-1.46993	0.00037439	0.00849962	7968.48	15226.5	6801.93	9666.3	5164.29	4522.27	1578.56	3051.45
CL.32860	CL.32860.1	8.99192	0.000374819	0.00850453	0	0	0	0	204.129	115.361	0	86.715
CL.15668	evm.model.group3.1155	0.707534	0.000376838	0.00854549	794.265	646.983	572.111	817.207	1312.88	1229.37	1154.2	921.676
CL.24672	CL.24672.1	0.397339	0.000378289	0.00857356	928.257	909.62	949.394	804.746	1265.77	1062.14	1203.96	1200.87
CL.5783	CL.5783.1	9.62504	0.000380213	0.00861228	0	0	0	0	472.811	132.426	24.881	0
CL.11910	CL.11910.2	-9.18593	0.000381232	0.0086305	0	223.135	42.5217	101.761	0	0	0	0
CL.34814	evm.model.utg87_2701784_3545125__.8	-1.37168	0.000383021	0.00866609	1196.24	2331.7	1853.17	2111.03	774.643	1051.9	344.187	722.625
CL.34754	evm.model.utg830_3124181_3822791__.13	-1.10963	0.000384453	0.00869358	592.47	690.756	870.536	600.185	463.216	324.238	208.724	279.196
CL.20707	CL.20707.1	-1.95581	0.000387495	0.00874754	351.931	282.922	497.891	310.476	93.341	29.3521	165.873	85.4012
CL.4120	evm.model.group1.3148	-1.44905	0.000387712	0.00874754	284.127	314.951	129.885	198.331	81.1282	72.3563	117.493	69.6348
CL.14202	evm.model.group2.2458	3.28618	0.000387637	0.00874754	0	42.7052	13.1431	23.8828	235.533	211.608	170.02	165.547
CL.27723	evm.model.group7.1034	-1.45933	0.000387672	0.00874754	261.526	182.565	174.726	150.565	68.9153	60.0694	41.4683	107.08
CL.16447	evm.model.group3.1832	0.513048	0.000388335	0.00875666	2079.3	2097.89	2427.6	1964.62	2984.29	2527.69	3188.91	3532.98
CL.22190	CL.22190.1	-8.97499	0.000391345	0.00881957	0	99.2895	102.825	115.26	0	0	0	0
[truncated: 72,390 more rows]

## Sheet: Table S8
Table S8. Transcript-level functional annotations
[truncated: 202 more rows]

## Sheet: Table S9
Table S9. Methylation sites identified in the water form of Riccia fluitans
[truncated: 174 more rows]

[truncated: 9 more sheets: Table S10, Table S11, Table S12, Table S13, Table S14, Table S15, Table S16, Table S17, Table S18]
